# Supplementary material for: T cell proliferation-related subtypes, prognosis model and characterization of tumor microenvironment in head and neck squamous cell carcinoma
Source: Research Square preprint supplement (doi:10.21203/rs.3.rs-2684988/v1), 2023-03-17
Supplement: Supplementary file 1 [file 0b7b109202ef052c9d9592f0.xlsx]

## Sheet: Sheet1
Table S4: The activation states of biological functions and pathways in distinct TRG subtypes by GSVA enrichment analysis.
id	logFC	AveExpr	t	P.Value	adj.P.Val	B		id	logFC	AveExpr	t	P.Value	adj.P.Val	B
GOBP_REGULATION_OF_B_CELL_RECEPTOR_SIGNALING_PATHWAY	0.583042	-0.00231104	27.6255	1.48e-117	9.44e-114	257.628		KEGG_INTESTINAL_IMMUNE_NETWORK_FOR_IGA_PRODUCTION	0.501187	0.000966257	21.517	5.83e-81	1.07e-78	173.742
GOBP_B_CELL_RECEPTOR_SIGNALING_PATHWAY	0.509309	-0.00466329	25.7301	4.42e-106	1.41e-102	231.328		KEGG_CELL_ADHESION_MOLECULES_CAMS	0.340777	0.0111138	20.0232	2.86e-72	2.61e-70	153.834
GOBP_NEGATIVE_REGULATION_OF_B_CELL_ACTIVATION	0.442028	0.00559255	24.9452	2.41e-101	4.84e-98	220.472		KEGG_ASTHMA	0.506286	0.00661585	18.9319	4.77e-66	2.91e-64	139.579
GOBP_REGULATION_OF_B_CELL_DIFFERENTIATION	0.455769	-0.00383936	24.9285	3.04e-101	4.84e-98	220.241		KEGG_PRIMARY_IMMUNODEFICIENCY	0.459418	-0.00776176	18.8401	1.57e-65	7.2e-64	138.393
GOBP_NEGATIVE_REGULATION_OF_INTERLEUKIN_6_PRODUCTION	0.429446	0.00271835	24.7635	2.99e-100	3.81e-97	217.965		KEGG_SYSTEMIC_LUPUS_ERYTHEMATOSUS	0.433855	0.000813338	18.2457	3.37e-62	1.23e-60	130.765
GOBP_REGULATION_OF_B_CELL_ACTIVATION	0.364643	-0.00124277	23.8185	1.42e-94	1.5e-91	204.956		KEGG_HEMATOPOIETIC_CELL_LINEAGE	0.333703	0.0101575	16.8767	1.07e-54	3.26e-53	113.586
GOBP_DENDRITIC_CELL_APOPTOTIC_PROCESS	0.574762	0.00304475	23.7529	3.5e-94	3.18e-91	204.055		KEGG_B_CELL_RECEPTOR_SIGNALING_PATHWAY	0.23671	-0.00290549	15.9422	9.9e-50	2.59e-48	102.218
GOBP_NEGATIVE_REGULATION_OF_B_CELL_PROLIFERATION	0.494517	0.00554781	23.3216	1.32e-91	1.05e-88	198.146		KEGG_CHEMOKINE_SIGNALING_PATHWAY	0.234691	0.00327335	15.5403	1.23e-47	2.8e-46	97.4289
GOMF_G_PROTEIN_COUPLED_CHEMOATTRACTANT_RECEPTOR_ACTIVITY	0.561627	0.000532641	22.7784	2.28e-88	1.61e-85	190.73		KEGG_AUTOIMMUNE_THYROID_DISEASE	0.446995	0.00343222	15.5077	1.81e-47	3.67e-46	97.0429
GOBP_NEGATIVE_T_CELL_SELECTION	0.601112	0.00928654	22.6672	1.04e-87	6.64e-85	189.216		KEGG_LEISHMANIA_INFECTION	0.311202	0.00129953	15.3383	1.35e-46	2.47e-45	95.0457
GOBP_REGULATION_OF_B_CELL_PROLIFERATION	0.393863	6.57e-05	22.6567	1.2e-87	6.97e-85	189.073		KEGG_ALLOGRAFT_REJECTION	0.453042	0.00224458	14.661	3.7e-43	6.15e-42	87.1796
GOBP_MATURE_B_CELL_DIFFERENTIATION	0.45472	0.00167338	22.5696	3.95e-87	2.1e-84	187.889		KEGG_TYPE_I_DIABETES_MELLITUS	0.384	0.00704086	14.102	2.19e-40	3.33e-39	80.8406
GOBP_POSITIVE_REGULATION_OF_B_CELL_DIFFERENTIATION	0.45754	-0.00962555	22.4644	1.66e-86	8.15e-84	186.459		KEGG_CYTOKINE_CYTOKINE_RECEPTOR_INTERACTION	0.241263	0.00978594	14.0861	2.62e-40	3.68e-39	80.6626
GOBP_REGULATION_OF_GRANULOCYTE_DIFFERENTIATION	0.419951	0.00477447	22.4581	1.81e-86	8.22e-84	186.374		KEGG_T_CELL_RECEPTOR_SIGNALING_PATHWAY	0.215081	-0.000744043	13.9277	1.55e-39	2.03e-38	78.8932
GOMF_CYCLIC_NUCLEOTIDE_PHOSPHODIESTERASE_ACTIVITY	0.393151	0.0088603	22.4532	1.94e-86	8.22e-84	186.307		KEGG_VIRAL_MYOCARDITIS	0.266974	0.00416084	13.6942	2.1e-38	2.56e-37	76.3079
GOBP_B_CELL_ACTIVATION	0.311063	-0.000853489	22.419	3.09e-86	1.23e-83	185.843		KEGG_NATURAL_KILLER_CELL_MEDIATED_CYTOTOXICITY	0.23109	0.000535834	13.6242	4.56e-38	5.22e-37	75.5382
GOBP_CD8_POSITIVE_ALPHA_BETA_T_CELL_DIFFERENTIATION	0.516865	-0.00175298	22.2751	2.19e-85	8.22e-83	183.891		KEGG_LEUKOCYTE_TRANSENDOTHELIAL_MIGRATION	0.190939	0.00831801	13.1717	6.46e-36	6.96e-35	70.6208
GOBP_LEUKOCYTE_TETHERING_OR_ROLLING	0.403892	0.00352895	22.1943	6.6e-85	2.33e-82	182.795		KEGG_GLYCOSPHINGOLIPID_BIOSYNTHESIS_GANGLIO_SERIES	0.268355	-0.00224194	12.8926	1.3e-34	1.33e-33	67.6396
GOBP_T_CELL_SELECTION	0.457876	0.00337702	22.1568	1.1e-84	3.68e-82	182.287		KEGG_STEROID_BIOSYNTHESIS	-0.27161	-0.000507437	-12.814	3.01e-34	2.9e-33	66.8086
GOBP_B_CELL_PROLIFERATION	0.378996	0.00220034	22.0075	8.36e-84	2.66e-81	180.267		KEGG_GRAFT_VERSUS_HOST_DISEASE	0.372508	0.00306191	11.9332	2.88e-30	2.64e-29	57.7175
GOCC_PLASMA_MEMBRANE_SIGNALING_RECEPTOR_COMPLEX	0.266855	0.00451923	21.9475	1.89e-83	5.73e-81	179.455		KEGG_VASCULAR_SMOOTH_MUSCLE_CONTRACTION	0.146027	0.000325634	11.4368	4.15e-28	3.62e-27	52.7912
GOMF_CORECEPTOR_ACTIVITY	0.398999	0.00497146	21.8472	7.37e-83	2.13e-80	178.101		KEGG_DRUG_METABOLISM_OTHER_ENZYMES	-0.165467	0.0175769	-10.9486	4.77e-26	3.97e-25	48.093
GOBP_B_CELL_DIFFERENTIATION	0.306197	0.000524866	21.579	2.78e-81	7.7e-79	174.486		KEGG_GLYCOSYLPHOSPHATIDYLINOSITOL_GPI_ANCHOR_BIOSYNTHESIS	-0.196223	-0.00956675	-10.8592	1.12e-25	8.9e-25	47.2488
GOBP_REGULATION_OF_ANTIGEN_RECEPTOR_MEDIATED_SIGNALING_PATHWAY	0.400214	-0.00178792	21.486	9.78e-81	2.6e-78	173.235		KEGG_FC_EPSILON_RI_SIGNALING_PATHWAY	0.13704	-0.00147112	10.7931	2.1e-25	1.6e-24	46.627
GOMF_C_C_CHEMOKINE_BINDING	0.539421	0.00297838	21.4023	3.03e-80	7.72e-78	172.11		KEGG_RNA_POLYMERASE	-0.216055	-0.0228343	-10.7423	3.39e-25	2.48e-24	46.1522
GOBP_B_CELL_ACTIVATION_INVOLVED_IN_IMMUNE_RESPONSE	0.317273	-0.00265948	21.3604	5.33e-80	1.31e-77	171.547		KEGG_TOLL_LIKE_RECEPTOR_SIGNALING_PATHWAY	0.162154	0.00225915	10.7215	4.12e-25	2.9e-24	45.9576
GOBP_IMMUNOLOGICAL_SYNAPSE_FORMATION	0.485441	0.0102107	21.1845	5.7e-79	1.34e-76	169.189		KEGG_TERPENOID_BACKBONE_BIOSYNTHESIS	-0.262197	-0.0112522	-10.6869	5.71e-25	3.87e-24	45.6361
GOBP_ANTIGEN_RECEPTOR_MEDIATED_SIGNALING_PATHWAY	0.351426	-0.00239113	21.1412	1.02e-78	2.32e-76	168.609		KEGG_COMPLEMENT_AND_COAGULATION_CASCADES	0.198573	0.0145065	10.5839	1.5e-24	9.79e-24	44.6806
GOBP_RESPONSE_TO_PROSTAGLANDIN_E	0.367295	0.00356432	21.0596	3.05e-78	6.71e-76	167.518		KEGG_ANTIGEN_PROCESSING_AND_PRESENTATION	0.270566	-0.00216591	10.5519	2.02e-24	1.27e-23	44.3851
GOBP_POSITIVE_REGULATION_OF_B_CELL_ACTIVATION	0.307087	-0.00415526	20.9988	6.91e-78	1.47e-75	166.705		KEGG_BASAL_TRANSCRIPTION_FACTORS	-0.191193	-0.00164325	-10.4616	4.67e-24	2.85e-23	43.556
GOBP_GAMMA_DELTA_T_CELL_DIFFERENTIATION	0.399847	-0.00428213	20.8976	2.69e-77	5.52e-75	165.353		KEGG_TRYPTOPHAN_METABOLISM	0.156491	-0.000887215	10.2816	2.44e-23	1.44e-22	41.9186
GOBP_T_CELL_ACTIVATION_VIA_T_CELL_RECEPTOR_CONTACT_WITH_ANTIGEN_BOUND_TO_MHC_MOLECULE_ON_ANTIGEN_PRESENTING_CELL	0.602125	0.00217829	20.8892	3.01e-77	5.99e-75	165.241		KEGG_OOCYTE_MEIOSIS	-0.120007	-0.00048365	-9.78232	2.15e-21	1.2e-20	37.4901
GOBP_CD4_POSITIVE_OR_CD8_POSITIVE_ALPHA_BETA_T_CELL_LINEAGE_COMMITMENT	0.473448	0.0086711	20.8399	5.83e-77	1.12e-74	164.583		KEGG_PROTEASOME	-0.254618	-0.0144212	-9.78195	2.16e-21	1.2e-20	37.4869
GOCC_T_CELL_RECEPTOR_COMPLEX	0.656149	-0.0011029	20.8315	6.52e-77	1.22e-74	164.472		KEGG_GLYCEROPHOSPHOLIPID_METABOLISM	-0.112401	-0.00579667	-9.727	3.5e-21	1.88e-20	37.01
GOBP_POSITIVE_T_CELL_SELECTION	0.468666	0.00456633	20.8275	6.88e-77	1.25e-74	164.418		KEGG_TASTE_TRANSDUCTION	0.146662	0.00729084	9.50356	2.44e-20	1.27e-19	35.0927
GOMF_CHEMOKINE_BINDING	0.438034	0.00664585	20.7387	2.26e-76	3.99e-74	163.235		KEGG_PYRIMIDINE_METABOLISM	-0.143251	-0.0150075	-9.41753	5.1e-20	2.59e-19	34.3639
GOBP_THYMIC_T_CELL_SELECTION	0.456436	0.00331078	20.5665	2.26e-75	3.88e-73	160.944		KEGG_JAK_STAT_SIGNALING_PATHWAY	0.13855	0.00949626	9.39347	6.26e-20	3.1e-19	34.1609
GOMF_HYDROLASE_ACTIVITY_ACTING_ON_GLYCOSYL_BONDS	0.205508	-0.00228036	20.5252	3.91e-75	6.56e-73	160.395		KEGG_NEUROACTIVE_LIGAND_RECEPTOR_INTERACTION	0.128843	0.0186258	9.38252	6.87e-20	3.31e-19	34.0687
GOBP_NEGATIVE_REGULATION_OF_PRODUCTION_OF_MOLECULAR_MEDIATOR_OF_IMMUNE_RESPONSE	0.358913	0.00810838	20.3166	6.3e-74	1.03e-71	157.629		KEGG_LYSOSOME	0.133722	-0.00957329	8.92254	3.21e-18	1.51e-17	30.2738
GOBP_CELLULAR_EXTRAVASATION	0.33275	0.0063241	20.1725	4.27e-73	6.81e-71	155.724		KEGG_BLADDER_CANCER	-0.119119	-0.00362594	-8.87057	4.92e-18	2.25e-17	29.8548
GOBP_LYMPHOCYTE_ACTIVATION_INVOLVED_IN_IMMUNE_RESPONSE	0.318037	0.00119983	20.1597	5.06e-73	7.8e-71	155.555		KEGG_CALCIUM_SIGNALING_PATHWAY	0.10122	0.00915459	8.77898	1.03e-17	4.62e-17	29.1212
GOBP_REGULATION_OF_LYMPHOCYTE_DIFFERENTIATION	0.301397	0.00228544	20.1585	5.15e-73	7.8e-71	155.54		KEGG_PRION_DISEASES	0.133801	0.00174928	8.68191	2.26e-17	9.85e-17	28.3504
GOBP_NEGATIVE_REGULATION_OF_ANTIGEN_RECEPTOR_MEDIATED_SIGNALING_PATHWAY	0.402561	0.00417189	20.1282	7.69e-73	1.14e-70	155.139		KEGG_PENTOSE_PHOSPHATE_PATHWAY	-0.158098	-0.00669533	-8.55563	6.19e-17	2.63e-16	27.3583
GOBP_T_CELL_LINEAGE_COMMITMENT	0.427037	0.00590076	20.0895	1.28e-72	1.86e-70	154.629		KEGG_OTHER_GLYCAN_DEGRADATION	0.199382	-0.0100898	8.32787	3.69e-16	1.53e-15	25.5996
GOBP_REGULATION_OF_GLIAL_CELL_MIGRATION	0.437024	0.0115677	20.0473	2.25e-72	3.18e-70	154.073		KEGG_AMINOACYL_TRNA_BIOSYNTHESIS	-0.18496	-0.0124176	-8.17095	1.23e-15	5.02e-15	24.4109
GOBP_REGULATION_OF_DENDRITIC_CELL_CHEMOTAXIS	0.490003	-0.00127575	20.0185	3.29e-72	4.55e-70	153.694		KEGG_CITRATE_CYCLE_TCA_CYCLE	-0.157608	-0.0146359	-7.89143	1.01e-14	4.03e-14	22.3409
GOBP_IMMUNE_RESPONSE_REGULATING_CELL_SURFACE_RECEPTOR_SIGNALING_PATHWAY	0.334198	0.000756938	20.0038	4e-72	5.42e-70	153.499		KEGG_GLYCOSPHINGOLIPID_BIOSYNTHESIS_GLOBO_SERIES	0.154736	-0.00567943	7.82594	1.64e-14	6.4e-14	21.8648
GOBP_ALPHA_BETA_T_CELL_ACTIVATION	0.34244	0.00317071	19.8598	2.68e-71	3.56e-69	151.605		KEGG_FC_GAMMA_R_MEDIATED_PHAGOCYTOSIS	0.104561	0.00439749	7.76336	2.6e-14	9.92e-14	21.413
GOBP_REGULATION_OF_CELLULAR_EXTRAVASATION	0.338454	0.00581879	19.8456	3.24e-71	4.21e-69	151.418		KEGG_PRIMARY_BILE_ACID_BIOSYNTHESIS	0.16226	0.00388936	7.71141	3.8e-14	1.42e-13	21.0403
GOBP_ALPHA_BETA_T_CELL_DIFFERENTIATION	0.337829	0.0037697	19.8288	4.04e-71	5.15e-69	151.197		KEGG_GLYOXYLATE_AND_DICARBOXYLATE_METABOLISM	-0.155	-0.0117825	-7.4566	2.37e-13	8.67e-13	19.2434
GOBP_POSITIVE_REGULATION_OF_LYMPHOCYTE_DIFFERENTIATION	0.322126	0.00307333	19.8212	4.46e-71	5.57e-69	151.098		KEGG_FRUCTOSE_AND_MANNOSE_METABOLISM	-0.116228	-0.00898332	-7.26276	9.21e-13	3.3e-12	17.9116
GOBP_POSITIVE_THYMIC_T_CELL_SELECTION	0.511018	0.000889436	19.8198	4.55e-71	5.57e-69	151.079		KEGG_NUCLEOTIDE_EXCISION_REPAIR	-0.147348	-0.0165967	-7.15422	1.94e-12	6.84e-12	17.1792
GOCC_EXTERNAL_SIDE_OF_PLASMA_MEMBRANE	0.332091	0.00683759	19.7948	6.32e-71	7.6e-69	150.751		KEGG_SULFUR_METABOLISM	0.145735	-0.00598187	7.1415	2.12e-12	7.32e-12	17.094
GOBP_DENDRITIC_CELL_MIGRATION	0.399825	0.00500367	19.7876	6.95e-71	8.2e-69	150.657		KEGG_RIBOFLAVIN_METABOLISM	0.123357	-0.00709006	7.09875	2.84e-12	9.61e-12	16.8086
GOMF_3_5_CYCLIC_GMP_PHOSPHODIESTERASE_ACTIVITY	0.406176	0.0069429	19.6754	3.05e-70	3.53e-68	149.185		KEGG_CELL_CYCLE	-0.129537	-0.011328	-7.01962	4.84e-12	1.58e-11	16.2844
GOBP_POSITIVE_REGULATION_OF_ANTIGEN_RECEPTOR_MEDIATED_SIGNALING_PATHWAY	0.38605	-0.0059138	19.6702	3.27e-70	3.71e-68	149.117		KEGG_ABC_TRANSPORTERS	0.108018	0.00529859	6.98408	6.15e-12	1.97e-11	16.0506
GOBP_ACTIVATION_OF_IMMUNE_RESPONSE	0.304623	0.00124734	19.6383	4.97e-70	5.56e-68	148.699		KEGG_ACUTE_MYELOID_LEUKEMIA	0.100827	0.00148997	6.96029	7.21e-12	2.28e-11	15.8948
GOBP_CD4_POSITIVE_ALPHA_BETA_T_CELL_DIFFERENTIATION	0.349727	0.00286329	19.6245	5.96e-70	6.55e-68	148.518		KEGG_GALACTOSE_METABOLISM	-0.128637	-0.00595402	-6.91073	1e-11	3.11e-11	15.5715
GOBP_CALCIUM_ION_IMPORT_INTO_CYTOSOL	0.325277	0.00532533	19.6074	7.47e-70	8.06e-68	148.294		KEGG_ALDOSTERONE_REGULATED_SODIUM_REABSORPTION	0.10599	0.0092443	6.86763	1.33e-11	4.07e-11	15.292
GOBP_POSITIVE_REGULATION_OF_INFLAMMATORY_RESPONSE_TO_ANTIGENIC_STIMULUS	0.468233	-0.00128781	19.5474	1.64e-69	1.74e-67	147.509		KEGG_RNA_DEGRADATION	-0.12357	-0.0142975	-6.7156	3.61e-11	1.07e-10	14.3186
GOBP_CD8_POSITIVE_ALPHA_BETA_T_CELL_ACTIVATION	0.440876	0.00545945	19.5452	1.69e-69	1.75e-67	147.481		KEGG_DILATED_CARDIOMYOPATHY	0.128877	0.000348563	6.62964	6.29e-11	1.83e-10	13.7769
GOBP_LYMPHOCYTE_COSTIMULATION	0.384022	0.000151209	19.5448	1.7e-69	1.75e-67	147.476		KEGG_SPLICEOSOME	-0.135658	-0.0136095	-6.28884	5.33e-10	1.46e-09	11.6906
GOBP_MONONUCLEAR_CELL_DIFFERENTIATION	0.271535	0.00205863	19.5104	2.67e-69	2.7e-67	147.026		KEGG_GLYCOSAMINOGLYCAN_BIOSYNTHESIS_CHONDROITIN_SULFATE	0.154711	-0.00574791	6.2822	5.55e-10	1.49e-09	11.6509
GOBP_DENDRITIC_CELL_CHEMOTAXIS	0.425964	0.00064495	19.4969	3.19e-69	3.17e-67	146.849		KEGG_ONE_CARBON_POOL_BY_FOLATE	-0.132292	-0.00489432	-6.12501	1.44e-09	3.71e-09	10.723
GOBP_CELL_ACTIVATION_INVOLVED_IN_IMMUNE_RESPONSE	0.306389	0.00285677	19.4897	3.5e-69	3.43e-67	146.756		KEGG_HUNTINGTONS_DISEASE	-0.102434	-0.0209797	-6.09066	1.77e-09	4.49e-09	10.5231
GOBP_NEGATIVE_REGULATION_OF_IMMUNOGLOBULIN_PRODUCTION	0.363676	0.00776554	19.4825	3.85e-69	3.72e-67	146.661		KEGG_PANTOTHENATE_AND_COA_BIOSYNTHESIS	0.100896	0.00514807	5.81956	8.62e-09	2.1e-08	8.98121
GOMF_IMMUNOGLOBULIN_BINDING	0.454238	0.0163882	19.374	1.6e-68	1.52e-66	145.246		KEGG_STEROID_HORMONE_BIOSYNTHESIS	-0.11832	0.0182161	-5.74581	1.31e-08	3.16e-08	8.57291
GOBP_CALCIUM_MEDIATED_SIGNALING	0.239339	0.00312981	19.3499	2.19e-68	2.05e-66	144.932		KEGG_HYPERTROPHIC_CARDIOMYOPATHY_HCM	0.108776	-0.00318951	5.36739	1.05e-07	2.38e-07	6.55328
GOBP_NEGATIVE_REGULATION_OF_LYMPHOCYTE_MIGRATION	0.39884	0.00583857	19.2849	5.13e-68	4.73e-66	144.085		KEGG_FOLATE_BIOSYNTHESIS	-0.108894	-0.00649497	-5.33497	1.25e-07	2.76e-07	6.38619
GOBP_POSITIVE_REGULATION_OF_LEUKOCYTE_CELL_CELL_ADHESION	0.326688	0.00247117	19.2551	7.57e-68	6.88e-66	143.698		KEGG_PROTEIN_EXPORT	-0.107924	-0.0184398	-4.8298	1.65e-06	3.5e-06	3.90482
GOBP_CALCIUM_ION_TRANSPORT_INTO_CYTOSOL	0.22894	0.00493791	19.2515	7.93e-68	7.12e-66	143.651		KEGG_OXIDATIVE_PHOSPHORYLATION	-0.111136	-0.0302938	-4.7764	2.13e-06	4.38e-06	3.65604
GOBP_LOCOMOTORY_EXPLORATION_BEHAVIOR	0.35606	0.00565796	19.2068	1.42e-67	1.26e-65	143.07		KEGG_PARKINSONS_DISEASE	-0.103224	-0.0263292	-4.56034	5.93e-06	1.19e-05	2.67619
GOBP_T_HELPER_17_CELL_LINEAGE_COMMITMENT	0.490956	0.00951651	19.195	1.66e-67	1.44e-65	142.917		KEGG_RIBOSOME	-0.103404	-0.0343955	-3.0559	0.00232041	0.00353862	-2.93657
GOMF_IMMUNE_RECEPTOR_ACTIVITY	0.404773	0.00869088	19.1941	1.68e-67	1.44e-65	142.905
GOBP_POSITIVE_REGULATION_OF_B_CELL_PROLIFERATION	0.323441	-0.000949972	19.1874	1.83e-67	1.55e-65	142.819
GOBP_T_CELL_DIFFERENTIATION	0.284107	0.00213744	19.1804	2.01e-67	1.68e-65	142.727
GOBP_LEUKOCYTE_HOMEOSTASIS	0.2726	0.000668538	19.1534	2.85e-67	2.35e-65	142.377
GOBP_IMMUNOLOGICAL_MEMORY_PROCESS	0.404187	0.00617639	19.1529	2.87e-67	2.35e-65	142.37
GOMF_SH2_DOMAIN_BINDING	0.31708	-0.000343417	19.1222	4.29e-67	3.46e-65	141.971
GOBP_NEGATIVE_REGULATION_OF_MAST_CELL_ACTIVATION	0.408792	0.0100745	19.1137	4.79e-67	3.82e-65	141.861
GOBP_ANTIGEN_PROCESSING_AND_PRESENTATION_OF_EXOGENOUS_PEPTIDE_ANTIGEN_VIA_MHC_CLASS_II	0.524285	0.00184989	19.1082	5.15e-67	4.05e-65	141.79
GOBP_REGULATION_OF_LEUKOCYTE_DIFFERENTIATION	0.274387	0.00441636	19.1044	5.41e-67	4.2e-65	141.741
GOBP_LEUKOCYTE_ADHESION_TO_VASCULAR_ENDOTHELIAL_CELL	0.320133	0.00549022	19.0995	5.77e-67	4.42e-65	141.677
GOBP_CYTOSOLIC_CALCIUM_ION_TRANSPORT	0.213935	0.00507986	19.083	7.15e-67	5.42e-65	141.463
GOBP_REGULATION_OF_B_CELL_MEDIATED_IMMUNITY	0.273594	0.00295438	19.0721	8.24e-67	6.18e-65	141.321
GOBP_B_CELL_MEDIATED_IMMUNITY	0.340505	0.00145021	19.0499	1.1e-66	8.15e-65	141.034
GOBP_REGULATION_OF_T_CELL_DIFFERENTIATION	0.291014	0.00305657	19.0186	1.65e-66	1.21e-64	140.628
GOBP_REGULATION_OF_LEUKOCYTE_TETHERING_OR_ROLLING	0.415144	0.00263287	18.9496	4.06e-66	2.93e-64	139.736
GOBP_REGULATION_OF_LYMPHOCYTE_ACTIVATION	0.27639	0.00325958	18.939	4.65e-66	3.33e-64	139.599
GOBP_POSITIVE_REGULATION_OF_CELL_CELL_ADHESION	0.29465	0.00360491	18.894	8.35e-66	5.91e-64	139.017
GOBP_MHC_CLASS_II_BIOSYNTHETIC_PROCESS	0.429233	-0.00523261	18.8498	1.48e-65	1.04e-63	138.447
GOBP_POSITIVE_REGULATION_OF_CELL_ACTIVATION	0.2973	0.00250727	18.8359	1.77e-65	1.23e-63	138.268
GOBP_POSITIVE_REGULATION_OF_HEMOPOIESIS	0.285896	0.00378093	18.8222	2.12e-65	1.45e-63	138.09
GOBP_RESPONSE_TO_HYDROPEROXIDE	0.336901	-0.00174262	18.7106	9e-65	6.09e-63	136.652
GOBP_LEUKOCYTE_DIFFERENTIATION	0.246267	0.00326737	18.6932	1.13e-64	7.55e-63	136.428
GOBP_NEGATIVE_REGULATION_OF_MYELOID_LEUKOCYTE_MEDIATED_IMMUNITY	0.450554	0.0106611	18.6899	1.18e-64	7.8e-63	136.385
GOBP_REGULATION_OF_CYTOSOLIC_CALCIUM_ION_CONCENTRATION	0.228492	0.00756525	18.6481	2.02e-64	1.32e-62	135.849
GOBP_NEGATIVE_REGULATION_OF_CELL_ACTIVATION	0.273091	0.00785215	18.6288	2.59e-64	1.68e-62	135.6
GOBP_T_CELL_HOMEOSTASIS	0.280222	-0.00382142	18.5938	4.07e-64	2.61e-62	135.151
GOMF_HYDROLASE_ACTIVITY_HYDROLYZING_N_GLYCOSYL_COMPOUNDS	0.23694	-0.00209436	18.5575	6.49e-64	4.13e-62	134.685
