# Supplementary material for: T cell proliferation-related subtypes, prognosis model and characterization of tumor microenvironment in head and neck squamous cell carcinoma
Source: Research Square preprint supplement (doi:10.21203/rs.3.rs-2684988/v1), 2023-03-17
Supplement: Supplementary file 1 [file 33f29b8a756da52417e1a725.docx]

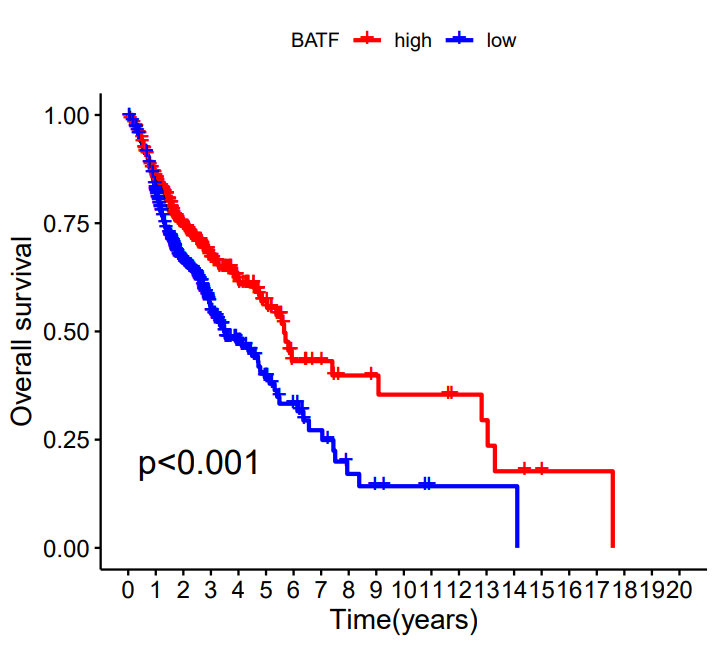

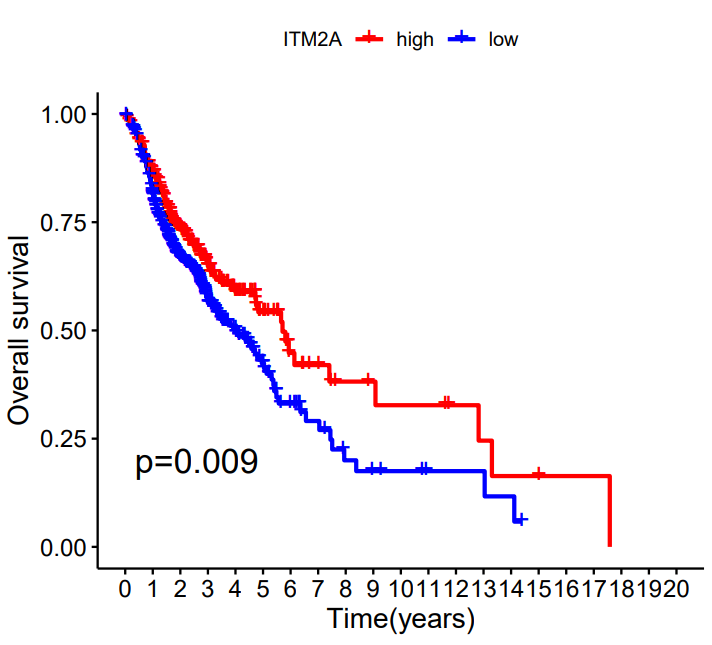

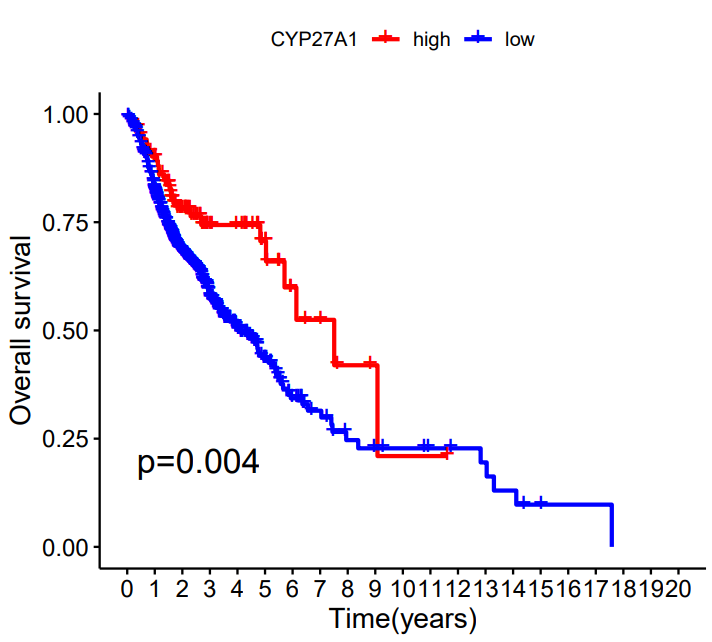

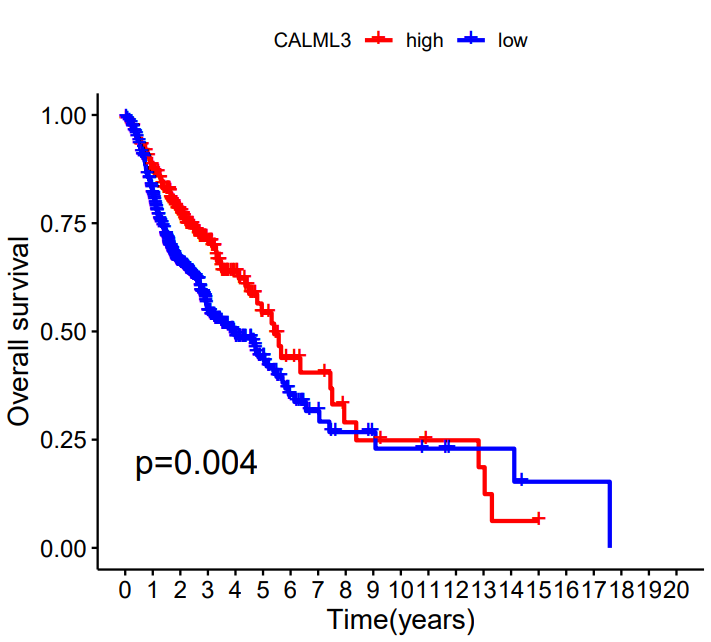

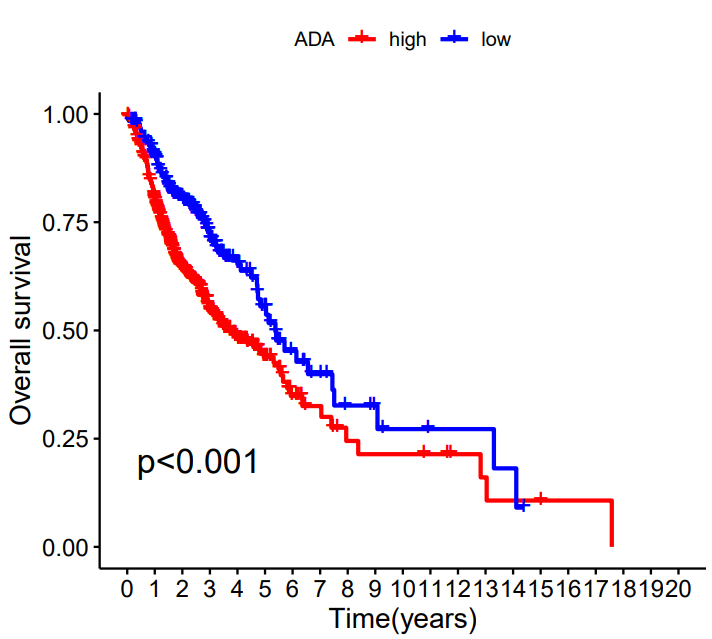

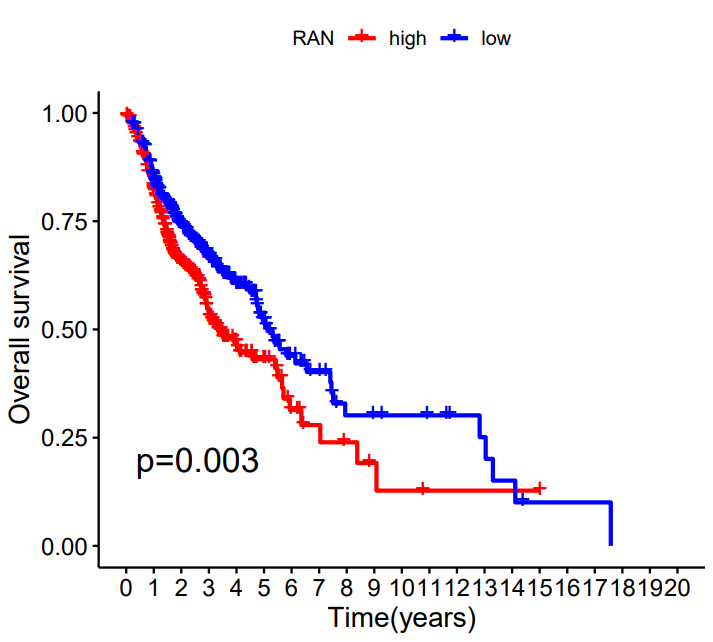

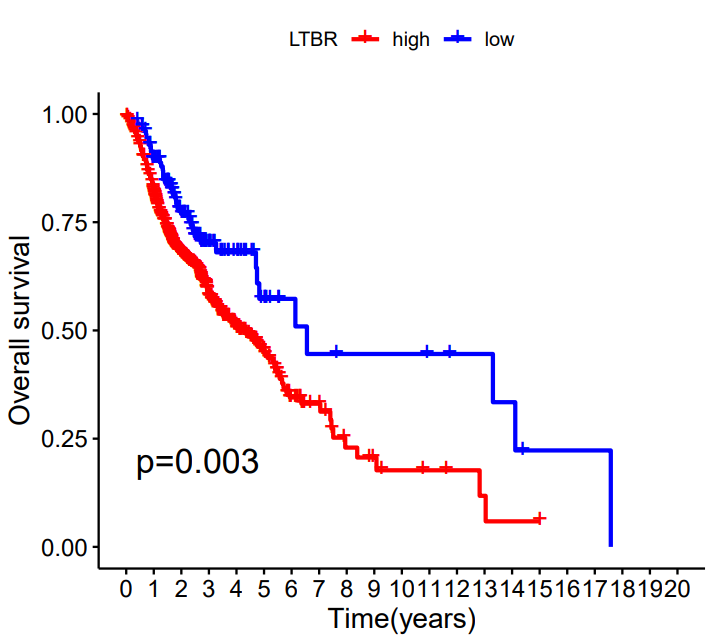

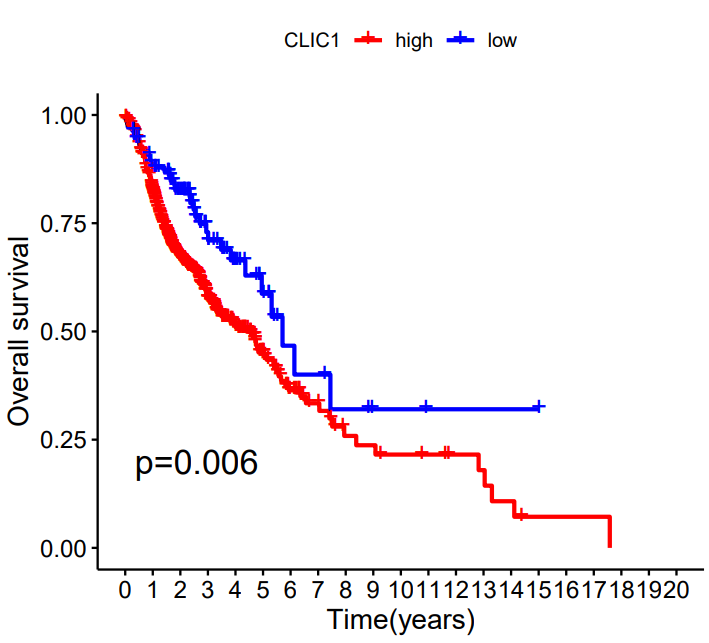

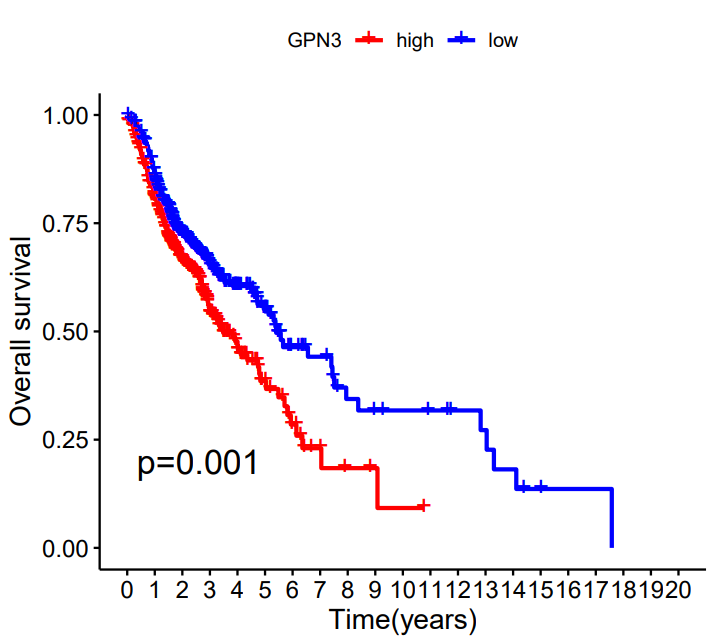


**Fig. S2** Kaplan Meier analysis revealed the prognostic values of Different expression levels of TRGs in patients with HNSC, and p < 0.05 was selected as the threshold for filtering.
