# Supplementary material for: T cell proliferation-related subtypes, prognosis model and characterization of tumor microenvironment in head and neck squamous cell carcinoma
Source: Research Square preprint supplement (doi:10.21203/rs.3.rs-2684988/v1), 2023-03-17
Supplement: Supplementary file 3 [file 5964ed2350ced3dc67aab714.docx]

HNSC samples from two datasets

（n=771）

Validation of risk score

Characteristics of TME in distinct subtypes

Identification of T cell proliferation-related subtypes

Development of a prognostic nomogram

Unsupervised clustering for T cell proliferation-related genes

Identification of T cell proliferation-related genes

Correlation of risk score with TME and immune checkpoint

Correlation of risk score with overall survival

Correlation of risk score with CSC index

Correlation of risk score with mutation and drug sensitivity

LASSO and multivariate Cox regression analyses for quantifying T cell proliferation-related pattern

Gene subtypeA

SubtypeB

Gene subtypeB

Gene subtypeC

SubtypeA

**Fig. S1** Flow chart of the study.
