# Supplementary material for: T cell proliferation-related subtypes, prognosis model and characterization of tumor microenvironment in head and neck squamous cell carcinoma
Source: Research Square preprint supplement (doi:10.21203/rs.3.rs-2684988/v1), 2023-03-17
Supplement: Supplementary file 4 [file 5666ad53f448bcbfc728b12c.xlsx]

## Sheet: Sheet1
Table S6: Functional annotation of the differentially expressed genes between the two TRG subypes.
ONTOLOGY	ID	Description	GeneRatio	BgRatio	pvalue	p.adjust	qvalue	geneID	Count		ID	Description	GeneRatio	BgRatio	pvalue	p.adjust	qvalue	geneID	Count
BP	GO:0007159	leukocyte cell-cell adhesion	116/1211	381/18800	8.56e-48	4.35e-44	3.13e-44	NCKAP1L/SLAMF1/CD5/ITGB2/FERMT3/ITGAL/SASH3/CD4/CD28/VCAM1/CD27/CORO1A/CCR7/RASAL3/CCR2/ALOX5/CD6/LAPTM5/FCGR2B/SELL/CCL19/FGL2/PTPRC/HLA-DMB/CLECL1/RHOH/VAV1/CD3E/ZAP70/HLA-DQA1/HLA-DOA/SIRPG/DOCK8/SELPLG/PIK3R6/HLA-DPB1/LILRB4/CD40LG/FYN/IL4I1/LAX1/ICOS/AIF1/LCK/SKAP1/CTLA4/IL2RA/HAVCR2/CD74/HLA-DPA1/PECAM1/TNFRSF14/LILRB1/EBI3/TNFAIP8L2/TIGIT/TNFSF13B/CD300A/HLA-DRA/ITGB7/CX3CR1/PTPN22/SPN/HLA…	116		hsa04640	Hematopoietic cell lineage	45/672	99/8170	1.84e-23	5.56e-21	4.43e-21	CD37/CD5/CD4/CD2/HLA-DMB/CD3E/CD3G/HLA-DQA1/ITGAM/HLA-DOA/CSF1R/HLA-DPB1/CD3D/IL2RA/HLA-DPA1/HLA-DRA/CD19/CD8B/HLA-DMA/CD7/CD8A/MS4A1/CD22/CD1C/CD1E/KIT/FCGR1A/HLA-DQB1/CD14/ITGA4/IL11RA/HLA-DOB/CD34/CD1B/CSF1/HLA-DQA2/CSF3R/HLA-DRB1/CR2/IL7R/IL1A/HLA-DRB5/ITGA6/CD1A/CSF2	45
BP	GO:0070661	leukocyte proliferation	105/1211	330/18800	2.73e-45	6.95e-42	5e-42	BTK/DOCK2/NCKAP1L/SLAMF1/SASH3/CD28/VCAM1/PLCL2/PIK3CG/CORO1A/RASAL3/CCR2/CD6/FCGR2B/TNFRSF1B/CCL19/PTPRC/HLA-DMB/CLECL1/FCRL3/CD3E/ZAP70/LST1/DOCK8/INPP5D/CSF1R/HLA-DPB1/LILRB4/CD40LG/FYN/IL4I1/AIF1/TNFSF8/GAPT/TYROBP/CTLA4/IL2RA/HAVCR2/CD74/HLA-DPA1/BCL2/TLR4/TNFRSF14/LILRB1/EBI3/TNFSF13B/CD300A/IKZF3/GPR183/CD19/TNFRSF13B/CD79A/ST6GAL1/PTPN22/SPN/CSF2RB/LGALS9/CD86/TNFRSF4/PLA2G2D/MNDA/CD180/I…	105		hsa04514	Cell adhesion molecules	56/672	157/8170	1.36e-22	2.06e-20	1.64e-20	ITGB2/ITGAL/CD4/CD28/VCAM1/ICAM3/CD6/ICAM2/SELL/CD2/PTPRC/HLA-DMB/HLA-DQA1/ITGAM/HLA-DOA/SELPLG/HLA-DPB1/CD40LG/ICOS/CTLA4/PDCD1/HLA-DPA1/PECAM1/TIGIT/HLA-DRA/ITGB7/CD8B/SPN/HLA-DMA/CD86/CD8A/JAM2/CD22/SELP/ITGA9/HLA-DQB1/ITGA4/HLA-DOB/PTPRM/CD34/CD40/HLA-DQA2/SELE/HLA-DRB1/ICAM1/CADM1/CDH5/JAM3/CLDN10/HLA-DRB5/ITGA6/CLDN5/CDH3/VCAN/CLDN3/SDC2	56
BP	GO:0050863	regulation of T cell activation	103/1211	342/18800	5.54e-42	9.39e-39	6.76e-39	NCKAP1L/SLAMF1/CD5/SASH3/CD4/CD28/VCAM1/CD27/CORO1A/CCR7/RASAL3/CCR2/CD6/LAPTM5/FCGR2B/TNFRSF1B/CCL19/FGL2/CD2/PTPRC/HLA-DMB/CLECL1/RHOH/VAV1/CD3E/ZAP70/HLA-DQA1/HLA-DOA/SIRPG/DOCK8/IRF4/PIK3R6/HLA-DPB1/LILRB4/CD40LG/FYN/IL4I1/LAX1/ICOS/AIF1/TNFSF8/LCK/CTLA4/IL2RA/HAVCR2/CD74/HLA-DPA1/TNFRSF14/LILRB1/EBI3/TNFAIP8L2/TIGIT/SIT1/TNFSF13B/CD300A/HLA-DRA/PTPN22/SPN/HLA-DMA/LGALS9/CD86/PLA2G2D/IL12RB1/…	103		hsa04060	Cytokine-cytokine receptor interaction	75/672	295/8170	9.42e-20	9.52e-18	7.57e-18	IL10RA/CD4/IL16/CD27/CXCR4/LTA/CCR7/IL21R/CCR2/IL2RG/LTB/TNFRSF1B/CXCR3/CCL19/TNFSF12/CSF1R/CD40LG/IL2RB/TNFSF8/CCR4/IL2RA/CXCR6/TNFRSF14/EBI3/TNFSF13B/TNFRSF9/TNFRSF13B/CX3CR1/CSF2RB/TNFRSF17/TNFRSF4/IL12RB1/CXCL12/CXCL13/CCR1/CCL18/IL18R1/IL18RAP/ACVRL1/IL11RA/CCL2/FASLG/TNFSF4/CCR8/CD40/IL34/FAS/LIFR/CSF1/CCL22/TGFB3/CCL5/IL27RA/TNFRSF13C/CCL4L2/CSF3R/CXCL9/IL32/CCL21/IL17RB/IFNG/CCL17/IL7R/CC…	75
BP	GO:1903037	regulation of leukocyte cell-cell adhesion	103/1211	344/18800	9.99e-42	1.27e-38	9.15e-39	NCKAP1L/SLAMF1/CD5/ITGB2/SASH3/CD4/CD28/VCAM1/CD27/CORO1A/CCR7/RASAL3/CCR2/ALOX5/CD6/LAPTM5/FCGR2B/CCL19/FGL2/PTPRC/HLA-DMB/CLECL1/RHOH/VAV1/CD3E/ZAP70/HLA-DQA1/HLA-DOA/SIRPG/DOCK8/PIK3R6/HLA-DPB1/LILRB4/CD40LG/FYN/IL4I1/LAX1/ICOS/AIF1/LCK/SKAP1/CTLA4/IL2RA/HAVCR2/CD74/HLA-DPA1/TNFRSF14/LILRB1/EBI3/TNFAIP8L2/TIGIT/TNFSF13B/CD300A/HLA-DRA/PTPN22/SPN/HLA-DMA/LGALS9/CD86/PLA2G2D/IL12RB1/CXCL12/CD83/…	103		hsa05150	Staphylococcus aureus infection	39/672	96/8170	2.31e-18	1.75e-16	1.39e-16	ITGB2/ITGAL/FCGR2B/HLA-DMB/HLA-DQA1/ITGAM/HLA-DOA/SELPLG/HLA-DPB1/HLA-DPA1/HLA-DRA/HLA-DMA/C3AR1/C1QC/C1QA/C1QB/FPR3/FCGR1A/SELP/HLA-DQB1/C2/HLA-DOB/C3/KRT17/FPR1/HLA-DQA2/FCGR3A/C5AR1/HLA-DRB1/ICAM1/KRT14/FCGR2A/HLA-DRB5/KRT16/KRT9/DSG1/KRT15/KRT10/KRT19	39
BP	GO:0022407	regulation of cell-cell adhesion	118/1211	456/18800	1.19e-40	1.21e-37	8.71e-38	NCKAP1L/SLAMF1/CD5/ITGB2/FERMT3/SASH3/CD4/CD28/VCAM1/CD27/CORO1A/CCR7/RASAL3/CCR2/ALOX5/CD6/LAPTM5/FCGR2B/AKNA/CCL19/FGL2/PTPRC/HLA-DMB/CLECL1/RHOH/VAV1/CD3E/SPI1/ZAP70/HLA-DQA1/HLA-DOA/SIRPG/DOCK8/PIK3R6/HLA-DPB1/LILRB4/CD40LG/FYN/IL4I1/LAX1/ICOS/AIF1/LCK/SKAP1/CTLA4/IL2RA/HAVCR2/CD74/HLA-DPA1/TNFRSF14/LILRB1/EBI3/TNFAIP8L2/TIGIT/TNFSF13B/CD300A/HLA-DRA/PTPN22/SPN/HLA-DMA/LGALS9/CD86/PLA2G2D/IL1…	118		hsa04061	Viral protein interaction with cytokine and cytokine receptor	39/672	100/8170	1.26e-17	7.65e-16	6.09e-16	IL10RA/CXCR4/LTA/CCR7/CCR2/IL2RG/TNFRSF1B/CXCR3/CCL19/CSF1R/IL2RB/CCR4/IL2RA/TNFRSF14/CX3CR1/CXCL12/CXCL13/CCR1/CCL18/IL18R1/IL18RAP/CCL2/CCR8/IL34/CSF1/CCL22/CCL5/CCL4L2/CXCL9/CCL21/CCL17/CCL13/IL20RB/CX3CL1/CCL8/CXCL10/IL24/CXCL14/CXCL11	39
BP	GO:0070663	regulation of leukocyte proliferation	87/1211	254/18800	1.8e-40	1.52e-37	1.1e-37	BTK/NCKAP1L/SLAMF1/SASH3/CD28/VCAM1/CORO1A/RASAL3/CCR2/CD6/FCGR2B/TNFRSF1B/CCL19/PTPRC/HLA-DMB/CLECL1/FCRL3/CD3E/ZAP70/LST1/INPP5D/CSF1R/HLA-DPB1/LILRB4/CD40LG/IL4I1/AIF1/TNFSF8/TYROBP/CTLA4/IL2RA/HAVCR2/CD74/HLA-DPA1/BCL2/TLR4/TNFRSF14/LILRB1/EBI3/TNFSF13B/CD300A/IKZF3/GPR183/TNFRSF13B/ST6GAL1/PTPN22/SPN/CSF2RB/LGALS9/CD86/TNFRSF4/PLA2G2D/MNDA/IL12RB1/PTPN6/CD22/GSTP1/MEF2C/LILRB2/BTN2A2/FOXP3/P…	87		hsa04672	Intestinal immune network for IgA production	26/672	49/8170	3.72e-16	1.88e-14	1.49e-14	CD28/CXCR4/HLA-DMB/HLA-DQA1/HLA-DOA/HLA-DPB1/CD40LG/ICOS/HLA-DPA1/TNFSF13B/HLA-DRA/ITGB7/TNFRSF13B/HLA-DMA/TNFRSF17/CD86/CXCL12/MAP3K14/HLA-DQB1/ITGA4/HLA-DOB/CD40/TNFRSF13C/HLA-DQA2/HLA-DRB1/HLA-DRB5	26
BP	GO:1903131	mononuclear cell differentiation	114/1211	433/18800	4.54e-40	3.3e-37	2.37e-37	ITM2A/BTK/DOCK2/NCKAP1L/IRF8/SLAMF1/SASH3/CD4/SLAMF6/CD28/IKZF1/VCAM1/ITK/PLCL2/CD27/CCR7/CCR2/BATF/LY9/FCGR2B/TMEM176A/CCL19/FGL2/PREX1/CD2/PTPRC/CD79B/RHOH/VAV1/FCRL3/CD3E/SPI1/ZAP70/CD3G/TMEM176B/HLA-DOA/DOCK10/INPP5D/IRF4/PIK3R6/CSF1R/LILRB4/CD3D/CD40LG/IL4I1/GPR18/TNFSF8/LCK/CTLA4/IL2RA/LYL1/CD74/BCL2/LILRB1/TNFSF13B/SLAMF8/HLA-DRA/IKZF3/GPR183/CD19/CD79A/PTPN22/SPN/FCER1G/LGALS9/CD86/EOMES/…	114		hsa05416	Viral myocarditis	28/672	60/8170	2.03e-15	8.8e-14	7e-14	ITGB2/ITGAL/CD28/HLA-DMB/HLA-DQA1/HLA-DOA/HLA-DPB1/CD40LG/FYN/HLA-DPA1/HLA-DRA/HLA-DMA/CD86/HLA-DQB1/HLA-DOB/CD40/PRF1/DMD/HLA-DQA2/RAC2/HLA-DRB1/ICAM1/HLA-DRB5/LAMA2/SGCD/CAV1/SGCA/MYH7	28
BP	GO:0032943	mononuclear cell proliferation	94/1211	300/18800	5.79e-40	3.68e-37	2.65e-37	BTK/DOCK2/NCKAP1L/SLAMF1/SASH3/CD28/VCAM1/PLCL2/PIK3CG/CORO1A/RASAL3/CCR2/CD6/FCGR2B/TNFRSF1B/CCL19/PTPRC/HLA-DMB/CLECL1/FCRL3/CD3E/ZAP70/LST1/DOCK8/INPP5D/HLA-DPB1/LILRB4/CD40LG/FYN/IL4I1/AIF1/TNFSF8/GAPT/TYROBP/CTLA4/IL2RA/HAVCR2/CD74/HLA-DPA1/BCL2/TLR4/TNFRSF14/LILRB1/EBI3/TNFSF13B/CD300A/IKZF3/GPR183/CD19/TNFRSF13B/CD79A/ST6GAL1/PTPN22/SPN/LGALS9/CD86/TNFRSF4/PLA2G2D/MNDA/CD180/IL12RB1/MS4A1/…	94		hsa04940	Type I diabetes mellitus	23/672	43/8170	1.55e-14	5.86e-13	4.66e-13	CD28/LTA/HLA-DMB/HLA-DQA1/HLA-DOA/HLA-DPB1/HLA-DPA1/HLA-DRA/HLA-DMA/CD86/HLA-DQB1/HLA-DOB/FASLG/ICA1/FAS/PRF1/GZMB/HLA-DQA2/HLA-DRB1/IFNG/IL1A/HLA-DRB5/CPE	23
BP	GO:0022409	positive regulation of cell-cell adhesion	92/1211	291/18800	1.74e-39	9.85e-37	7.09e-37	NCKAP1L/SLAMF1/CD5/ITGB2/SASH3/CD4/CD28/VCAM1/CD27/CORO1A/CCR7/RASAL3/CCR2/ALOX5/CD6/CCL19/PTPRC/HLA-DMB/CLECL1/RHOH/VAV1/CD3E/ZAP70/HLA-DQA1/HLA-DOA/SIRPG/DOCK8/PIK3R6/HLA-DPB1/LILRB4/CD40LG/FYN/IL4I1/ICOS/AIF1/LCK/SKAP1/IL2RA/HAVCR2/CD74/HLA-DPA1/TNFRSF14/LILRB1/EBI3/TNFSF13B/HLA-DRA/PTPN22/HLA-DMA/LGALS9/CD86/IL12RB1/CXCL13/CD83/PTPN6/SELP/LILRB2/HLA-DQB1/ITGA4/HLA-DOB/BTN2A2/FUT7/RUNX3/CCL2/F…	92		hsa05330	Allograft rejection	21/672	38/8170	9.25e-14	3.11e-12	2.48e-12	CD28/HLA-DMB/HLA-DQA1/HLA-DOA/HLA-DPB1/CD40LG/HLA-DPA1/HLA-DRA/HLA-DMA/CD86/HLA-DQB1/HLA-DOB/FASLG/CD40/FAS/PRF1/GZMB/HLA-DQA2/HLA-DRB1/IFNG/HLA-DRB5	21
BP	GO:0050900	leukocyte migration	106/1211	384/18800	2.54e-39	1.29e-36	9.3e-37	NCKAP1L/SLAMF1/ITGB2/ITGAL/GPSM3/VCAM1/IL16/CXCR4/PIK3CG/CORO1A/CCR7/CCR2/ALOX5/SELL/CXCR3/CCL19/PREX1/RHOH/VAV1/SPI1/ZAP70/DOCK8/SELPLG/CSF1R/FYN/AIF1/GPR18/LCK/CD74/PECAM1/TNFRSF14/SLAMF8/CD300A/GPR183/ITGB7/STAP1/CX3CR1/SPN/FCER1G/CMKLR1/LGALS9/CD200/CXCL12/CXCL13/CCR1/MCOLN2/JAM2/PDE4B/C3AR1/HCK/S1PR1/CCL18/PLA2G7/KIT/SELP/ITGA9/ITGA4/PTGER4/FUT7/CCL2/RARRES2/CD34/IL34/CSF1/THBS4/CCL22/CCL5/A…	106		hsa04062	Chemokine signaling pathway	49/672	192/8170	2.65e-13	8.02e-12	6.38e-12	DOCK2/WAS/PRKCB/ITK/CXCR4/PIK3CG/CCR7/CCR2/PLCB2/FGR/CXCR3/CCL19/PREX1/VAV1/PIK3R6/GNG7/CCR4/GNG2/RASGRP2/CXCR6/CX3CR1/GNGT2/PIK3R5/CXCL12/CXCL13/CCR1/HCK/ARRB1/CCL18/NCF1/CCL2/ELMO1/CCR8/CCL22/PIK3R1/CCL5/JAK2/CCL4L2/RAC2/CXCL9/CCL21/ADCY6/CCL17/CCL13/CX3CL1/CCL8/CXCL10/CXCL14/CXCL11	49
BP	GO:1903039	positive regulation of leukocyte cell-cell adhesion	84/1211	245/18800	3.86e-39	1.79e-36	1.29e-36	NCKAP1L/SLAMF1/CD5/ITGB2/SASH3/CD4/CD28/VCAM1/CD27/CORO1A/CCR7/RASAL3/CCR2/ALOX5/CD6/CCL19/PTPRC/HLA-DMB/CLECL1/RHOH/VAV1/CD3E/ZAP70/HLA-DQA1/HLA-DOA/SIRPG/DOCK8/PIK3R6/HLA-DPB1/LILRB4/CD40LG/FYN/IL4I1/ICOS/AIF1/LCK/SKAP1/IL2RA/HAVCR2/CD74/HLA-DPA1/TNFRSF14/LILRB1/EBI3/TNFSF13B/HLA-DRA/PTPN22/HLA-DMA/LGALS9/CD86/IL12RB1/CD83/PTPN6/SELP/LILRB2/HLA-DQB1/ITGA4/HLA-DOB/BTN2A2/FUT7/RUNX3/CCL2/FOXP3/TN…	84		hsa05140	Leishmaniasis	29/672	77/8170	5.75e-13	1.58e-11	1.26e-11	ITGB2/PRKCB/NCF4/HLA-DMB/CYBB/HLA-DQA1/ITGAM/HLA-DOA/HLA-DPB1/HLA-DPA1/TLR4/HLA-DRA/HLA-DMA/PTPN6/FCGR1A/HLA-DQB1/ITGA4/NCF1/HLA-DOB/C3/TGFB3/JAK2/HLA-DQA2/FCGR3A/HLA-DRB1/IFNG/IL1A/FCGR2A/HLA-DRB5	29
BP	GO:0046651	lymphocyte proliferation	92/1211	296/18800	8.37e-39	3.55e-36	2.55e-36	BTK/DOCK2/NCKAP1L/SLAMF1/SASH3/CD28/VCAM1/PLCL2/PIK3CG/CORO1A/RASAL3/CCR2/CD6/FCGR2B/TNFRSF1B/CCL19/PTPRC/HLA-DMB/CLECL1/FCRL3/CD3E/ZAP70/LST1/DOCK8/INPP5D/HLA-DPB1/LILRB4/CD40LG/FYN/IL4I1/AIF1/TNFSF8/GAPT/TYROBP/CTLA4/IL2RA/HAVCR2/CD74/HLA-DPA1/BCL2/TLR4/TNFRSF14/LILRB1/EBI3/TNFSF13B/CD300A/IKZF3/GPR183/CD19/TNFRSF13B/CD79A/PTPN22/SPN/LGALS9/CD86/TNFRSF4/PLA2G2D/MNDA/CD180/IL12RB1/MS4A1/PTPN6/CD…	92		hsa05323	Rheumatoid arthritis	32/672	93/8170	6.6e-13	1.67e-11	1.32e-11	ITGB2/ITGAL/CD28/LTB/HLA-DMB/HLA-DQA1/HLA-DOA/HLA-DPB1/CTLA4/HLA-DPA1/TLR4/TNFSF13B/HLA-DRA/HLA-DMA/CD86/CXCL12/HLA-DQB1/HLA-DOB/CCL2/ATP6V0E2/CSF1/TGFB3/CCL5/TEK/HLA-DQA2/HLA-DRB1/ICAM1/IFNG/IL1A/CTSK/HLA-DRB5/CSF2	32
BP	GO:0030098	lymphocyte differentiation	104/1211	382/18800	5.35e-38	1.99e-35	1.43e-35	ITM2A/BTK/DOCK2/NCKAP1L/IRF8/SLAMF1/SASH3/CD4/SLAMF6/CD28/IKZF1/VCAM1/ITK/PLCL2/CD27/CCR7/CCR2/BATF/LY9/FCGR2B/CCL19/FGL2/PREX1/CD2/PTPRC/CD79B/RHOH/VAV1/FCRL3/CD3E/SPI1/ZAP70/CD3G/HLA-DOA/DOCK10/INPP5D/IRF4/PIK3R6/LILRB4/CD3D/CD40LG/IL4I1/GPR18/TNFSF8/LCK/CTLA4/IL2RA/LYL1/CD74/BCL2/TNFSF13B/SLAMF8/HLA-DRA/IKZF3/GPR183/CD19/CD79A/PTPN22/SPN/FCER1G/LGALS9/CD86/EOMES/CD8A/PLA2G2D/POU2AF1/IL12RB1/CD…	104		hsa05340	Primary immunodeficiency	20/672	38/8170	1.25e-12	2.91e-11	2.31e-11	BTK/CD4/IL2RG/PTPRC/CD3E/ZAP70/CD3D/CD40LG/ICOS/LCK/CD19/CD8B/TNFRSF13B/CIITA/CD79A/CD8A/CD40/TNFRSF13C/IGLL1/IL7R	20
BP	GO:0045785	positive regulation of cell adhesion	113/1211	446/18800	5.47e-38	1.99e-35	1.43e-35	SPOCK2/NCKAP1L/SLAMF1/APBB1IP/CD5/ITGB2/SASH3/CD4/CD28/VCAM1/CD27/CORO1A/CCR7/RASAL3/CCR2/ALOX5/CD6/CCL19/PREX1/PTPRC/HLA-DMB/CLECL1/RHOH/VAV1/CD3E/ZAP70/HLA-DQA1/HLA-DOA/SIRPG/DOCK8/PIK3R6/HLA-DPB1/LILRB4/CD40LG/FYN/IL4I1/ICOS/AIF1/LCK/SKAP1/IL2RA/HAVCR2/CD74/HLA-DPA1/ABI3BP/TNFRSF14/LILRB1/EBI3/TNFSF13B/HLA-DRA/PTPN22/HLA-DMA/LGALS9/CD86/IL12RB1/CXCL12/CXCL13/CD83/PTPN6/SELP/LILRB2/HLA-DQB1/ITG…	113		hsa05332	Graft-versus-host disease	20/672	42/8170	1.39e-11	3.01e-10	2.39e-10	CD28/HLA-DMB/HLA-DQA1/HLA-DOA/HLA-DPB1/HLA-DPA1/HLA-DRA/HLA-DMA/CD86/HLA-DQB1/HLA-DOB/FASLG/FAS/PRF1/GZMB/HLA-DQA2/HLA-DRB1/IFNG/IL1A/HLA-DRB5	20
BP	GO:0002443	leukocyte mediated immunity	113/1211	457/18800	6.63e-37	2.25e-34	1.62e-34	BTK/NCKAP1L/WAS/SLAMF1/ITGB2/SASH3/SH2D1A/SLAMF6/CD28/CD27/PIK3CG/CORO1A/LTA/IL21R/CCR2/CD84/BATF/FCGR2B/TNFRSF1B/FGR/PTPRC/HLA-DMB/CD96/VAV1/SPI1/HLA-DQA1/ITGAM/HLA-DOA/LAT2/INPP5D/PIK3R6/HLA-DPB1/LILRB4/CD40LG/IL4I1/GAPT/SLA2/GZMM/TYROBP/HAVCR2/CD74/TLR8/HLA-DPA1/TLR4/LILRB1/CD300A/HLA-DRA/CD19/STAP1/CX3CR1/PRAM1/FCER1G/CSF2RB/NCR3/HLA-DMA/LGALS9/NKG7/CD8A/SLAMF7/ARID5A/IL12RB1/C1QC/PTPN6/PTGDS…	113		hsa04659	Th17 cell differentiation	32/672	108/8170	6.17e-11	1.25e-09	9.92e-10	CD4/IL21R/IL2RG/CD247/HLA-DMB/CD3E/ZAP70/CD3G/HLA-DQA1/HLA-DOA/IRF4/HLA-DPB1/CD3D/IL2RB/LCK/IL2RA/HLA-DPA1/EBI3/HLA-DRA/HLA-DMA/STAT5A/IL12RB1/HLA-DQB1/HLA-DOB/FOXP3/NFKBIE/JAK2/IL27RA/HLA-DQA2/HLA-DRB1/IFNG/HLA-DRB5	32
BP	GO:0032944	regulation of mononuclear cell proliferation	79/1211	233/18800	1.84e-36	5.66e-34	4.07e-34	BTK/NCKAP1L/SLAMF1/SASH3/CD28/VCAM1/CORO1A/RASAL3/CCR2/CD6/FCGR2B/TNFRSF1B/CCL19/PTPRC/HLA-DMB/CLECL1/FCRL3/CD3E/ZAP70/LST1/INPP5D/HLA-DPB1/LILRB4/CD40LG/IL4I1/AIF1/TNFSF8/TYROBP/CTLA4/IL2RA/HAVCR2/CD74/HLA-DPA1/BCL2/TLR4/TNFRSF14/LILRB1/EBI3/TNFSF13B/CD300A/IKZF3/GPR183/TNFRSF13B/ST6GAL1/PTPN22/SPN/LGALS9/CD86/TNFRSF4/PLA2G2D/MNDA/IL12RB1/PTPN6/CD22/MEF2C/LILRB2/BTN2A2/FOXP3/PKN1/TNFSF4/BLK/CD40…	79		hsa04658	Th1 and Th2 cell differentiation	29/672	92/8170	9.37e-11	1.77e-09	1.41e-09	CD4/IL2RG/CD247/HLA-DMB/CD3E/ZAP70/CD3G/HLA-DQA1/HLA-DOA/HLA-DPB1/CD3D/IL2RB/LCK/IL2RA/HLA-DPA1/HLA-DRA/HLA-DMA/STAT5A/IL12RB1/STAT4/HLA-DQB1/HLA-DOB/RUNX3/NFKBIE/JAK2/HLA-DQA2/HLA-DRB1/IFNG/HLA-DRB5	29
BP	GO:0002683	negative regulation of immune system process	108/1211	425/18800	1.89e-36	5.66e-34	4.07e-34	BTK/NCKAP1L/SLAMF1/SH2D1A/PLCL2/TBC1D10C/CCR2/LAPTM5/CD84/FCGR2B/TMEM176A/FGR/FGL2/PTPRC/UBASH3A/CD96/FCRL3/SPI1/SYT11/CST7/TMEM176B/HLA-DOA/LST1/INPP5D/NLRC3/LILRB4/SAMSN1/FYN/IL4I1/LPXN/LAX1/GPR18/SLA2/CD300LF/TYROBP/CTLA4/IL2RA/HAVCR2/PDCD1/CD74/TLR4/TNFRSF14/LILRB1/TNFAIP8L2/TIGIT/SLAMF8/CD300A/STAP1/TNFRSF13B/CX3CR1/PTPN22/SPN/LGALS9/CD86/CD200/NR1H3/PLA2G2D/MNDA/CXCL12/A2M/C1QC/HCK/PTPN6/CD…	108		hsa05320	Autoimmune thyroid disease	21/672	53/8170	3.11e-10	5.55e-09	4.42e-09	CD28/HLA-DMB/HLA-DQA1/HLA-DOA/HLA-DPB1/CD40LG/CTLA4/HLA-DPA1/HLA-DRA/HLA-DMA/CD86/HLA-DQB1/HLA-DOB/FASLG/CD40/FAS/PRF1/GZMB/HLA-DQA2/HLA-DRB1/HLA-DRB5	21
BP	GO:0050870	positive regulation of T cell activation	76/1211	223/18800	2.75e-35	7.76e-33	5.59e-33	NCKAP1L/SLAMF1/CD5/SASH3/CD4/CD28/VCAM1/CD27/CORO1A/CCR7/RASAL3/CCR2/CD6/CCL19/PTPRC/HLA-DMB/CLECL1/RHOH/VAV1/CD3E/ZAP70/HLA-DQA1/HLA-DOA/SIRPG/DOCK8/PIK3R6/HLA-DPB1/LILRB4/CD40LG/FYN/IL4I1/ICOS/AIF1/LCK/IL2RA/HAVCR2/CD74/HLA-DPA1/TNFRSF14/LILRB1/EBI3/TNFSF13B/HLA-DRA/PTPN22/HLA-DMA/LGALS9/CD86/IL12RB1/CD83/PTPN6/LILRB2/HLA-DQB1/HLA-DOB/BTN2A2/RUNX3/CCL2/FOXP3/TNFSF4/CD209/HLA-DQB2/CCL5/JAK2/IL27…	76		hsa05310	Asthma	16/672	31/8170	3.44e-10	5.79e-09	4.6e-09	HLA-DMB/HLA-DQA1/HLA-DOA/HLA-DPB1/CD40LG/HLA-DPA1/HLA-DRA/FCER1G/HLA-DMA/HLA-DQB1/HLA-DOB/CD40/HLA-DQA2/HLA-DRB1/HLA-DRB5/FCER1A	16
BP	GO:0050670	regulation of lymphocyte proliferation	77/1211	230/18800	4.01e-35	1.07e-32	7.73e-33	BTK/NCKAP1L/SLAMF1/SASH3/CD28/VCAM1/CORO1A/RASAL3/CCR2/CD6/FCGR2B/TNFRSF1B/CCL19/PTPRC/HLA-DMB/CLECL1/FCRL3/CD3E/ZAP70/LST1/INPP5D/HLA-DPB1/LILRB4/CD40LG/IL4I1/AIF1/TNFSF8/TYROBP/CTLA4/IL2RA/HAVCR2/CD74/HLA-DPA1/BCL2/TLR4/TNFRSF14/LILRB1/EBI3/TNFSF13B/CD300A/IKZF3/GPR183/TNFRSF13B/PTPN22/SPN/LGALS9/CD86/TNFRSF4/PLA2G2D/MNDA/IL12RB1/PTPN6/CD22/MEF2C/LILRB2/BTN2A2/FOXP3/PKN1/TNFSF4/BLK/CD40/CD209/C…	77		hsa05321	Inflammatory bowel disease	23/672	65/8170	6.39e-10	1.02e-08	8.1e-09	IL21R/IL2RG/HLA-DMB/HLA-DQA1/HLA-DOA/HLA-DPB1/HLA-DPA1/TLR4/HLA-DRA/HLA-DMA/IL12RB1/IL18R1/IL18RAP/STAT4/HLA-DQB1/HLA-DOB/FOXP3/TGFB3/HLA-DQA2/HLA-DRB1/IFNG/IL1A/HLA-DRB5	23
BP	GO:0002697	regulation of immune effector process	93/1211	353/18800	8.35e-33	2.12e-30	1.53e-30	BTK/NCKAP1L/WAS/SLAMF1/ITGB2/SASH3/SH2D1A/SLAMF6/CD28/LTA/CCR2/LAPTM5/CD84/FCGR2B/TNFRSF1B/FGR/CCL19/FGL2/PTPRC/HLA-DMB/CD96/VAV1/FCRL3/SPI1/ITGAM/IRF4/PIK3R6/LILRB4/CD40LG/IL4I1/TYROBP/HAVCR2/CD74/TLR4/TNFRSF14/LILRB1/SLAMF8/CD300A/HLA-DRA/STAP1/CX3CR1/PTPN22/PRAM1/NCR3/LGALS9/CD86/TNFRSF4/ARID5A/IL12RB1/A2M/PTPN6/CD22/CD1C/CD1E/IL18R1/KIT/FES/FCN1/NCF1/FUT7/FOXP3/C3/PKN1/LAG3/TNFSF4/BLK/CD40/CD…	93		hsa05145	Toxoplasmosis	31/672	112/8170	8.16e-10	1.24e-08	9.83e-09	IL10RA/PIK3CG/ALOX5/HLA-DMB/HLA-DQA1/HLA-DOA/PIK3R6/HLA-DPB1/CD40LG/HLA-DPA1/BCL2/TLR4/HLA-DRA/CIITA/HLA-DMA/PIK3R5/HLA-DQB1/HLA-DOB/CD40/TGFB3/BIRC3/JAK2/LY96/HLA-DQA2/HLA-DRB1/IFNG/HLA-DRB5/ITGA6/LAMA2/LAMC2/LAMA3	31
BP	GO:0060326	cell chemotaxis	87/1211	315/18800	2.1e-32	5.08e-30	3.66e-30	NCKAP1L/SLAMF1/ITGB2/GPSM3/VCAM1/IL16/CXCR4/PIK3CG/CORO1A/CCR7/CCR2/ALOX5/BIN2/CXCR3/CCL19/PREX1/VAV1/SPI1/CSF1R/AIF1/GPR18/CCR4/CXCR6/CD74/SLAMF8/GPR183/CCRL2/STAP1/CX3CR1/FCER1G/CMKLR1/LGALS9/CXCL12/CXCL13/CCR1/PDE4B/C3AR1/S1PR1/CCL18/PLA2G7/KIT/ITGA9/CCL2/RARRES2/CCR8/IL34/CSF1/PRKD1/THBS4/CCL22/PDGFRA/CCL5/F2RL1/PDGFD/NINJ1/MPP1/CH25H/LEF1/RAC2/CSF3R/PADI2/SMOC2/CXCL9/CCL21/FGF2/FGFR1/C5AR1/C…	87		hsa04145	Phagosome	37/672	152/8170	1.02e-09	1.47e-08	1.17e-08	ITGB2/NCF4/CORO1A/FCGR2B/CTSS/HLA-DMB/CYBB/HLA-DQA1/ITGAM/HLA-DOA/HLA-DPB1/HLA-DPA1/TLR4/HLA-DRA/HLA-DMA/FCGR1A/HLA-DQB1/CD14/NCF1/HLA-DOB/COLEC12/ATP6V0E2/C3/THBS4/CD209/HLA-DQA2/FCGR3A/TUBB6/TUBA4A/HLA-DRB1/MARCO/TUBB2A/FCGR2A/HLA-DRB5/MSR1/COMP/TUBB2B	37
BP	GO:0050867	positive regulation of cell activation	103/1211	436/18800	7.3e-32	1.69e-29	1.22e-29	BTK/NCKAP1L/SLAMF1/CD5/ITGB2/SASH3/CD4/CD28/VCAM1/CD27/CORO1A/CCR7/RASAL3/CCR2/CD6/PLEK/FGR/CCL19/CD2/PTPRC/HLA-DMB/CLECL1/RHOH/VAV1/FCRL3/CD3E/ZAP70/HLA-DQA1/ITGAM/HLA-DOA/SIRPG/DOCK8/INPP5D/PIK3R6/HLA-DPB1/LILRB4/CD40LG/FYN/IL4I1/ICOS/AIF1/LCK/TYROBP/IL2RA/HAVCR2/CD74/HLA-DPA1/BCL2/TLR4/TNFRSF14/LILRB1/EBI3/TNFSF13B/HLA-DRA/GPR183/STAP1/PTPN22/HLA-DMA/LGALS9/CD86/TNFRSF4/IL12RB1/CD83/PTPN6/MEF2…	103		hsa05144	Malaria	19/672	50/8170	5.06e-09	6.97e-08	5.55e-08	GYPC/ITGB2/ITGAL/VCAM1/KLRB1/CD40LG/TLR4/PECAM1/SELP/CCL2/CD40/THBS4/TGFB3/SELE/ICAM1/IFNG/MET/COMP/SDC2	19
BP	GO:0001819	positive regulation of cytokine production	107/1211	475/18800	3.71e-31	8.2e-29	5.9e-29	IRF8/SLAMF1/SASH3/GPSM3/CD4/SLAMF6/CD28/ITK/IL16/PIK3CG/LTA/CCR7/CCR2/CD6/LAPTM5/CD84/BATF/LY9/LTB/TLR7/FGR/CCL19/CD2/PTPRC/CLECL1/CYBB/CD3E/PYHIN1/IRF4/CSF1R/HLA-DPB1/CD40LG/CARD8/AIF1/TYROBP/HAVCR2/CD74/TLR8/HLA-DPA1/TLR4/TNFRSF14/LILRB1/EBI3/TIGIT/PTPN22/SPN/FCER1G/LGALS9/CD86/CD200/TLR1/ARID5A/POU2AF1/MNDA/IL12RB1/MCOLN2/CD83/PDE4B/C3AR1/CHI3L1/NFAM1/IL18R1/KIT/LILRB2/FCN1/CD14/ADRA2A/PTGER4/…	107		hsa04064	NF-kappa B signaling pathway	28/672	104/8170	1.06e-08	1.4e-07	1.12e-07	BTK/PRKCB/VCAM1/LTA/LTB/CCL19/ZAP70/CD40LG/LCK/TRAF1/BCL2/TLR4/TNFSF13B/CXCL12/MAP3K14/CD14/CD40/BIRC3/TNFRSF13C/LY96/BCL2A1/CCL4L2/CCL21/ICAM1/CCL13/CARD10/GADD45G/CARD11	28
BP	GO:0032103	positive regulation of response to external stimulus	102/1211	442/18800	1.19e-30	2.51e-28	1.81e-28	BTK/NCKAP1L/SLAMF1/GPSM3/SH2D1A/SLAMF6/CD28/IL16/CXCR4/PIK3CG/LTA/CCR7/CCR2/TLR7/CCL19/LY86/VAV1/SPI1/PYHIN1/CSF1R/FYN/AIF1/CCR4/ALOX5AP/TYROBP/HAVCR2/CD74/TLR8/TLR10/TLR4/STAP1/CX3CR1/NCR3/CMKLR1/LGALS9/NKG7/MNDA/CD180/CXCL12/CXCL13/CCR1/C3AR1/HCK/S1PR1/PLA2G7/FCN1/PTGER4/CARD9/C3/LAG3/RARRES2/TNFSF4/ZBP1/IL34/EMILIN2/CSF1/PRKD1/THBS4/LPL/CCL5/ETS1/F2RL1/ARTN/JAK2/PDGFD/NINJ1/LY96/RAC2/SMOC2/CCL…	102		hsa04660	T cell receptor signaling pathway	27/672	104/8170	4.52e-08	5.71e-07	4.54e-07	CD4/CD28/ITK/CD247/PTPRC/VAV1/GRAP2/CD3E/ZAP70/CD3G/CD3D/CD40LG/FYN/ICOS/LCK/CTLA4/PDCD1/CD8B/LCP2/CD8A/PTPN6/MAP3K14/NFKBIE/PIK3R1/IFNG/CARD11/CSF2	27
BP	GO:0002449	lymphocyte mediated immunity	91/1211	365/18800	3.99e-30	8.11e-28	5.84e-28	BTK/NCKAP1L/WAS/SLAMF1/SASH3/SH2D1A/SLAMF6/CD28/CD27/CORO1A/LTA/IL21R/CCR2/BATF/FCGR2B/TNFRSF1B/PTPRC/HLA-DMB/CD96/VAV1/HLA-DQA1/HLA-DOA/INPP5D/PIK3R6/HLA-DPB1/LILRB4/CD40LG/IL4I1/GAPT/SLA2/GZMM/HAVCR2/CD74/TLR8/HLA-DPA1/LILRB1/HLA-DRA/CD19/FCER1G/CSF2RB/NCR3/HLA-DMA/LGALS9/NKG7/CD8A/SLAMF7/ARID5A/IL12RB1/C1QC/PTPN6/C1QA/C1QB/CD1C/CD1E/IL18R1/FCGR1A/HLA-DQB1/C2/HLA-DOB/CARD9/FUT7/C7/FOXP3/C3/LAG3…	91		hsa04670	Leukocyte transendothelial migration	28/672	114/8170	9.25e-08	1.12e-06	8.92e-07	ITGB2/ITGAL/PRKCB/VCAM1/ITK/NCF4/CXCR4/RHOH/VAV1/CYBB/ITGAM/PECAM1/CXCL12/JAM2/ITGA4/NCF1/PIK3R1/RAC2/ICAM1/CDH5/THY1/JAM3/CLDN10/CLDN5/MMP9/CLDN3/MYL2/MYLPF	28
BP	GO:0002696	positive regulation of leukocyte activation	98/1211	421/18800	8.49e-30	1.66e-27	1.2e-27	BTK/NCKAP1L/SLAMF1/CD5/ITGB2/SASH3/CD4/CD28/VCAM1/CD27/CORO1A/CCR7/RASAL3/CCR2/CD6/FGR/CCL19/CD2/PTPRC/HLA-DMB/CLECL1/RHOH/VAV1/FCRL3/CD3E/ZAP70/HLA-DQA1/ITGAM/HLA-DOA/SIRPG/DOCK8/INPP5D/PIK3R6/HLA-DPB1/LILRB4/CD40LG/FYN/IL4I1/ICOS/AIF1/LCK/TYROBP/IL2RA/HAVCR2/CD74/HLA-DPA1/BCL2/TLR4/TNFRSF14/LILRB1/EBI3/TNFSF13B/HLA-DRA/GPR183/STAP1/PTPN22/HLA-DMA/LGALS9/CD86/TNFRSF4/IL12RB1/CD83/PTPN6/MEF2C/LIL…	98		hsa04662	B cell receptor signaling pathway	23/672	82/8170	9.71e-08	1.13e-06	9e-07	BTK/PRKCB/RASGRP3/FCGR2B/CD79B/VAV1/INPP5D/LILRB4/LILRB1/CD72/CD19/CD79A/PIK3AP1/PTPN6/CD22/LILRB3/LILRB2/NFKBIE/PIK3R1/LILRA6/RAC2/CR2/CARD11	23
BP	GO:0051251	positive regulation of lymphocyte activation	91/1211	371/18800	1.51e-29	2.84e-27	2.05e-27	BTK/NCKAP1L/SLAMF1/CD5/SASH3/CD4/CD28/VCAM1/CD27/CORO1A/CCR7/RASAL3/CCR2/CD6/CCL19/PTPRC/HLA-DMB/CLECL1/RHOH/VAV1/FCRL3/CD3E/ZAP70/HLA-DQA1/HLA-DOA/SIRPG/DOCK8/INPP5D/PIK3R6/HLA-DPB1/LILRB4/CD40LG/FYN/IL4I1/ICOS/AIF1/LCK/TYROBP/IL2RA/HAVCR2/CD74/HLA-DPA1/BCL2/TLR4/TNFRSF14/LILRB1/EBI3/TNFSF13B/HLA-DRA/GPR183/PTPN22/HLA-DMA/LGALS9/CD86/TNFRSF4/IL12RB1/CD83/PTPN6/MEF2C/LILRB2/HLA-DQB1/SH3KBP1/HLA-D…	91		hsa05146	Amoebiasis	26/672	102/8170	1.2e-07	1.35e-06	1.07e-06	ITGB2/PRKCB/PLCB2/ITGAM/TLR4/COL4A4/CD1C/CD1E/CD14/CD1B/PIK3R1/TGFB3/IFNG/LAMA2/CTSG/C8G/COL4A6/CD1A/LAMC2/SERPINB3/LAMA3/SERPINB13/COL3A1/CSF2/SERPINB4/COL1A2	26
BP	GO:0002460	adaptive immune response based on somatic recombination of immune receptors built from immunoglobulin superfamily domains	90/1211	370/18800	6.1e-29	1.11e-26	7.98e-27	BTK/NCKAP1L/WAS/SLAMF1/SASH3/CD4/SLAMF6/CD28/CD27/LTA/IL21R/CCR2/BATF/LY9/FCGR2B/TNFRSF1B/CCL19/PTPRC/HLA-DMB/HLA-DQA1/HLA-DOA/INPP5D/IRF4/HLA-DPB1/LILRB4/CD40LG/IL4I1/GAPT/SLA2/GZMM/HAVCR2/CD74/TLR8/HLA-DPA1/TLR4/LILRB1/EBI3/KLHL6/TNFSF13B/HLA-DRA/CD19/SPN/FCER1G/CSF2RB/HLA-DMA/CD8A/ARID5A/IL12RB1/CXCL13/C1QC/PTPN6/C1QA/C1QB/IL18BP/CD1C/CD1E/IL18R1/MEF2C/FCGR1A/HLA-DQB1/C2/HLA-DOB/CARD9/FUT7/C7/…	90		hsa05152	Tuberculosis	37/672	180/8170	1.28e-07	1.39e-06	1.1e-06	IL10RA/ITGB2/CORO1A/FCGR2B/CTSS/HLA-DMB/HLA-DQA1/ITGAM/HLA-DOA/HLA-DPB1/CD74/HLA-DPA1/BCL2/TLR4/HLA-DRA/CIITA/FCER1G/HLA-DMA/TLR1/ITGAX/FCGR1A/HLA-DQB1/CD14/HLA-DOB/CARD9/C3/CD209/TGFB3/JAK2/LSP1/HLA-DQA2/FCGR3A/HLA-DRB1/IFNG/IL1A/FCGR2A/HLA-DRB5	37
BP	GO:0002764	immune response-regulating signaling pathway	103/1211	482/18800	5.13e-28	9e-26	6.48e-26	BTK/NCKAP1L/SH2D1A/PRKCB/CD28/ITK/PLCL2/CCR7/BTLA/LAPTM5/FCGR2B/TLR7/FGR/CTSS/TRAT1/CD247/PTPRC/UBASH3A/CD79B/VAV1/FCRL3/ZAP70/LAT2/INPP5D/IRF4/HLA-DPB1/LILRB4/FYN/LPXN/LAX1/LCK/SLA2/SKAP1/CD300LF/TYROBP/CTLA4/HAVCR2/TLR8/TLR10/BCL2/TLR4/LILRB1/KLHL6/CD300A/CD19/STAP1/CD8B/CD79A/PTPN22/PRAM1/LCP2/FCER1G/PIK3AP1/NCR3/CMKLR1/NR1H3/CD8A/TLR1/MNDA/PDE4B/C3AR1/MS4A1/HCK/PTPN6/FPR3/CD22/NFAM1/KIT/MEF2C…	103		hsa04650	Natural killer cell mediated cytotoxicity	30/672	131/8170	1.73e-07	1.8e-06	1.43e-06	CD48/ITGB2/ITGAL/SH2D1A/PRKCB/ICAM2/CD247/VAV1/ZAP70/FYN/LCK/TYROBP/HCST/LCP2/FCER1G/NCR3/PTPN6/FASLG/FAS/PIK3R1/PRF1/GZMB/RAC2/FCGR3A/ULBP2/ICAM1/IFNG/RAET1G/RAET1L/CSF2	30
BP	GO:0050866	negative regulation of cell activation	66/1211	216/18800	1.29e-27	2.19e-25	1.58e-25	BTK/NCKAP1L/TBC1D10C/CCR2/LAPTM5/CD84/FCGR2B/FGR/FGL2/PTPRC/SPI1/SYT11/CST7/LST1/INPP5D/LILRB4/SAMSN1/IL4I1/LAX1/CD300LF/TYROBP/CTLA4/IL2RA/HAVCR2/CD74/TNFRSF14/LILRB1/TNFAIP8L2/TIGIT/CD300A/TNFRSF13B/PTPN22/SPN/LGALS9/CD86/CD200/NR1H3/PLA2G2D/MNDA/PTPN6/APOE/SH2B3/LILRB2/ID2/BTN2A2/RUNX3/FOXP3/PKN1/LAG3/TNFSF4/BLK/PDGFRA/MERTK/FOXF1/HLA-DRB1/VSIG4/EMILIN1/IL20RB/IRF1/LRRC32/CX3CL1/AXL/CTSG/IDO1/…	66		hsa04610	Complement and coagulation cascades	23/672	86/8170	2.52e-07	2.55e-06	2.03e-06	ITGB2/ITGAM/F5/ITGAX/A2M/C3AR1/C1QC/C1QA/C1QB/C2/C7/C3/SERPINA1/TFPI/C5AR1/VSIG4/CR2/SERPING1/F13A1/VWF/C8G/F3/SERPINB2	23
BP	GO:0030595	leukocyte chemotaxis	69/1211	236/18800	1.57e-27	2.58e-25	1.85e-25	NCKAP1L/SLAMF1/ITGB2/GPSM3/IL16/CXCR4/PIK3CG/CORO1A/CCR7/CCR2/ALOX5/CCL19/PREX1/VAV1/SPI1/CSF1R/AIF1/GPR18/CD74/SLAMF8/GPR183/STAP1/CX3CR1/FCER1G/CMKLR1/LGALS9/CXCL12/CXCL13/CCR1/PDE4B/C3AR1/S1PR1/CCL18/PLA2G7/KIT/ITGA9/CCL2/RARRES2/IL34/CSF1/THBS4/CCL22/CCL5/F2RL1/NINJ1/MPP1/CH25H/RAC2/CSF3R/PADI2/CXCL9/CCL21/C5AR1/CCL17/CCL13/JAM3/SLIT2/CX3CL1/S100A12/CTSG/S100A14/CCL8/PTN/C10orf99/CXCL10/S100A…	69		hsa04380	Osteoclast differentiation	28/672	128/8170	1.2e-06	1.17e-05	9.32e-06	BTK/NCF4/FCGR2B/SPI1/SIRPG/CSF1R/LILRB4/FYN/LCK/TYROBP/LILRB1/LCP2/LILRB3/FCGR1A/LILRB2/MAP3K14/NCF1/MITF/CSF1/PIK3R1/OSCAR/LILRA6/FCGR3A/FOSL1/IFNG/IL1A/CTSK/FCGR2A	28
BP	GO:0002695	negative regulation of leukocyte activation	62/1211	193/18800	2.35e-27	3.74e-25	2.69e-25	BTK/NCKAP1L/TBC1D10C/CCR2/LAPTM5/CD84/FCGR2B/FGR/FGL2/PTPRC/SPI1/SYT11/CST7/LST1/INPP5D/LILRB4/SAMSN1/IL4I1/LAX1/CD300LF/TYROBP/CTLA4/IL2RA/HAVCR2/CD74/TNFRSF14/LILRB1/TNFAIP8L2/TIGIT/CD300A/TNFRSF13B/PTPN22/SPN/LGALS9/CD86/CD200/NR1H3/PLA2G2D/MNDA/PTPN6/LILRB2/ID2/BTN2A2/RUNX3/FOXP3/PKN1/LAG3/TNFSF4/BLK/MERTK/FOXF1/HLA-DRB1/VSIG4/IL20RB/IRF1/LRRC32/CX3CL1/AXL/CTSG/IDO1/LGALS7B/SFRP1	62		hsa05166	Human T-cell leukemia virus 1 infection	39/672	222/8170	3.93e-06	3.72e-05	2.96e-05	ITGB2/ITGAL/CD4/LTA/IL2RG/HLA-DMB/CD3E/SPI1/CD3G/HLA-DQA1/HLA-DOA/HLA-DPB1/CD3D/IL2RB/LCK/IL2RA/HLA-DPA1/HLA-DRA/HLA-DMA/STAT5A/MAP3K14/HLA-DQB1/HLA-DOB/CD40/PIK3R1/TGFB3/SLC2A1/ETS1/TNFRSF13C/HLA-DQA2/HLA-DRB1/ICAM1/ADCY6/FOSL1/HLA-DRB5/EGR2/MMP7/CCNA1/CSF2	39
BP	GO:0002366	leukocyte activation involved in immune response	76/1211	285/18800	2.43e-27	3.75e-25	2.7e-25	ITM2A/BTK/DOCK2/NCKAP1L/IRF8/SLAMF1/APBB1IP/ITGB2/ITGAL/SLAMF6/CD28/PLCL2/PIK3CG/CORO1A/CCR2/CD84/BATF/LY9/FCGR2B/FGR/CCL19/FGL2/PTPRC/HLA-DMB/SPI1/LCP1/ITGAM/DOCK10/LAT2/IRF4/CD40LG/GAPT/TYROBP/HAVCR2/CD74/TLR4/LILRB1/CD300A/HLA-DRA/GPR183/CD19/CX3CR1/PRAM1/SPN/FCER1G/LGALS9/CD86/EOMES/NKG7/POU2AF1/CD180/IL12RB1/PTPN6/PTGDS/MFNG/CD1C/IL18R1/KIT/FES/PTGER4/FOXP3/TNFSF4/BLK/CD40/F2RL1/IL27RA/FOXF1…	76		hsa05322	Systemic lupus erythematosus	28/672	136/8170	4.25e-06	3.9e-05	3.1e-05	CD28/HLA-DMB/HLA-DQA1/HLA-DOA/HLA-DPB1/CD40LG/HLA-DPA1/HLA-DRA/HLA-DMA/CD86/C1QC/C1QA/C1QB/FCGR1A/HLA-DQB1/C2/HLA-DOB/C7/C3/CD40/HLA-DQA2/FCGR3A/HLA-DRB1/IFNG/FCGR2A/HLA-DRB5/CTSG/C8G	28
BP	GO:0002263	cell activation involved in immune response	76/1211	289/18800	6.48e-27	9.69e-25	6.98e-25	ITM2A/BTK/DOCK2/NCKAP1L/IRF8/SLAMF1/APBB1IP/ITGB2/ITGAL/SLAMF6/CD28/PLCL2/PIK3CG/CORO1A/CCR2/CD84/BATF/LY9/FCGR2B/FGR/CCL19/FGL2/PTPRC/HLA-DMB/SPI1/LCP1/ITGAM/DOCK10/LAT2/IRF4/CD40LG/GAPT/TYROBP/HAVCR2/CD74/TLR4/LILRB1/CD300A/HLA-DRA/GPR183/CD19/CX3CR1/PRAM1/SPN/FCER1G/LGALS9/CD86/EOMES/NKG7/POU2AF1/CD180/IL12RB1/PTPN6/PTGDS/MFNG/CD1C/IL18R1/KIT/FES/PTGER4/FOXP3/TNFSF4/BLK/CD40/F2RL1/IL27RA/FOXF1…	76		hsa04151	PI3K-Akt signaling pathway	53/672	354/8170	1.12e-05	9.96e-05	7.93e-05	PIK3CG/IL2RG/PIK3R6/CSF1R/IL2RB/GNG7/GNG2/IL2RA/BCL2/TLR4/ITGB7/CD19/COL4A4/PIK3AP1/GNGT2/PIK3R5/KIT/ITGA9/ITGA4/TCL1A/PKN1/FASLG/CSF1/THBS4/PDGFRA/PIK3R1/JAK2/FGF7/PDGFD/TEK/CSF3R/FGF2/FGFR1/TGFA/IL7R/MYB/LPAR3/ITGA6/LAMA2/PPP2R2C/VWF/MET/COMP/COL4A6/PDGFRB/COL9A2/LAMC2/EREG/COL6A2/COL6A3/COL6A1/LAMA3/COL1A2	53
BP	GO:0042098	T cell proliferation	63/1211	204/18800	1.06e-26	1.55e-24	1.11e-24	DOCK2/NCKAP1L/SLAMF1/SASH3/CD28/VCAM1/PIK3CG/CORO1A/RASAL3/CCR2/CD6/TNFRSF1B/CCL19/PTPRC/HLA-DMB/CLECL1/CD3E/ZAP70/DOCK8/HLA-DPB1/LILRB4/CD40LG/FYN/IL4I1/AIF1/TNFSF8/CTLA4/IL2RA/HAVCR2/HLA-DPA1/TNFRSF14/LILRB1/EBI3/TNFSF13B/PTPN22/SPN/LGALS9/CD86/TNFRSF4/PLA2G2D/IL12RB1/PTPN6/LILRB2/BTN2A2/FOXP3/TNFSF4/CD209/CCL5/JAK2/IL27RA/TNFRSF13C/RAC2/BTN3A1/HLA-DRB1/VSIG4/IL20RB/IL1A/IRF1/LRRC32/CARD11/IDO1…	63		hsa04612	Antigen processing and presentation	19/672	78/8170	1.23e-05	0.000106889	8.5e-05	CD4/CTSS/HLA-DMB/HLA-DQA1/HLA-DOA/HLA-DPB1/CD74/HLA-DPA1/HLA-DRA/CD8B/CIITA/HLA-DMA/CD8A/HLA-DQB1/HLA-DOB/HLA-DQA2/HLA-DRB1/IFNG/HLA-DRB5	19
BP	GO:0071674	mononuclear cell migration	61/1211	199/18800	1.08e-25	1.52e-23	1.09e-23	SLAMF1/ITGAL/CXCR4/PIK3CG/CCR7/CCR2/ALOX5/CCL19/SPI1/ZAP70/DOCK8/CSF1R/AIF1/PECAM1/TNFRSF14/SLAMF8/GPR183/ITGB7/CX3CR1/SPN/CMKLR1/LGALS9/CD200/CXCL12/CXCL13/CCR1/JAM2/C3AR1/S1PR1/CCL18/PLA2G7/ITGA4/FUT7/CCL2/RARRES2/IL34/CSF1/CCL22/CCL5/APOD/ARTN/PDGFD/IL27RA/CH25H/PADI2/CCL21/C5AR1/ICAM1/CCL17/CCL13/MYO1G/SLIT2/CX3CL1/S100A12/CTSG/S100A14/CCL8/C10orf99/CXCL10/S100A7/CXCL11	61		hsa04974	Protein digestion and absorption	22/672	103/8170	2.47e-05	0.000207904	0.000165398	SLC7A7/COL4A4/ELN/COL14A1/COL23A1/COL15A1/CPA3/COL4A6/COL8A2/COL9A2/ATP1A2/SLC7A8/COL22A1/COL6A2/COL6A3/COL8A1/COL6A1/COL17A1/COL3A1/COL1A2/COL10A1/PRSS3	22
BP	GO:0030217	T cell differentiation	70/1211	263/18800	3.27e-25	4.49e-23	3.23e-23	DOCK2/NCKAP1L/SASH3/CD4/SLAMF6/CD28/ITK/CD27/CCR7/CCR2/BATF/LY9/CCL19/FGL2/PREX1/CD2/PTPRC/RHOH/VAV1/CD3E/SPI1/ZAP70/CD3G/HLA-DOA/IRF4/PIK3R6/LILRB4/CD3D/IL4I1/GPR18/TNFSF8/LCK/CTLA4/IL2RA/CD74/BCL2/HLA-DRA/GPR183/PTPN22/SPN/FCER1G/LGALS9/CD86/EOMES/CD8A/PLA2G2D/IL12RB1/CD83/IL18R1/KIT/LILRB2/PTGER4/BTN2A2/FUT7/RUNX3/FOXP3/LAG3/TNFSF4/LEF1/ZEB1/ZNF683/TOX/HLA-DRB1/IFNG/IL7R/MYB/IL1A/IRF1/CARD11/N…	70		hsa05164	Influenza A	30/672	171/8170	5.25e-05	0.000430341	0.00034236	PRKCB/TLR7/HLA-DMB/HLA-DQA1/HLA-DOA/HLA-DPB1/HLA-DPA1/TLR4/HLA-DRA/CIITA/HLA-DMA/HLA-DQB1/HLA-DOB/CCL2/FASLG/FAS/PIK3R1/CCL5/JAK2/HLA-DQA2/HLA-DRB1/ICAM1/IFNG/TPSAB1/IL1A/HLA-DRB5/TPSB2/CXCL10/IL33/PRSS3	30
BP	GO:0042129	regulation of T cell proliferation	56/1211	174/18800	7.2e-25	9.63e-23	6.93e-23	NCKAP1L/SLAMF1/SASH3/CD28/VCAM1/CORO1A/RASAL3/CCR2/CD6/TNFRSF1B/CCL19/PTPRC/HLA-DMB/CLECL1/CD3E/ZAP70/HLA-DPB1/LILRB4/CD40LG/IL4I1/AIF1/TNFSF8/CTLA4/IL2RA/HAVCR2/HLA-DPA1/TNFRSF14/LILRB1/EBI3/TNFSF13B/PTPN22/SPN/LGALS9/CD86/PLA2G2D/IL12RB1/PTPN6/LILRB2/BTN2A2/FOXP3/TNFSF4/CD209/CCL5/JAK2/IL27RA/TNFRSF13C/RAC2/HLA-DRB1/VSIG4/IL20RB/IL1A/IRF1/LRRC32/CARD11/IDO1/LGALS7B	56		hsa05414	Dilated cardiomyopathy	20/672	96/8170	8.31e-05	0.000662556	0.000527099	ATP2A3/ITGB7/ITGA9/ITGA4/TGFB3/DMD/ADCY6/ITGA6/LAMA2/AGT/SGCD/ATP2A1/MYL3/SGCA/MYH7/TPM2/TNNC1/MYL2/DES/ACTC1	20
BP	GO:0002253	activation of immune response	86/1211	386/18800	7.71e-25	1.01e-22	7.24e-23	BTK/NCKAP1L/SH2D1A/PRKCB/CD28/ITK/PLCL2/CCR7/LAPTM5/FCGR2B/FGR/TRAT1/CD247/PTPRC/UBASH3A/CD79B/VAV1/FCRL3/ZAP70/LAT2/PYHIN1/INPP5D/HLA-DPB1/LILRB4/FYN/LPXN/LAX1/LCK/SLA2/SKAP1/TYROBP/CTLA4/BCL2/TLR4/KLHL6/CD300A/CD19/STAP1/CD8B/CD79A/PTPN22/PRAM1/LCP2/FCER1G/NCR3/CMKLR1/CD8A/MNDA/MFAP4/A2M/PDE4B/C3AR1/C1QC/MS4A1/HCK/PTPN6/C1QA/C1QB/FPR3/CD22/NFAM1/MEF2C/HLA-DQB1/FCN1/C2/BTN2A2/C7/FOXP3/C3/BLK/ZBP…	86		hsa05169	Epstein-Barr virus infection	33/672	202/8170	9.73e-05	0.000755608	0.000601126	BTK/ITGAL/CD247/HLA-DMB/ENTPD1/CD3E/CD3G/HLA-DQA1/HLA-DOA/HLA-DPB1/CD3D/HLA-DPA1/BCL2/HLA-DRA/CD19/HLA-DMA/MAP3K14/HLA-DQB1/HLA-DOB/RUNX3/CD40/NFKBIE/FAS/VIM/PIK3R1/HLA-DQA2/HLA-DRB1/ICAM1/CR2/HLA-DRB5/GADD45G/CXCL10/CCNA1	33
BP	GO:0019221	cytokine-mediated signaling pathway	98/1211	486/18800	1.16e-24	1.48e-22	1.07e-22	IL10RA/CD4/CXCR4/CCR7/IL21R/CCR2/LAPTM5/IL2RG/TNFRSF1B/CXCR3/CCL19/PTPRC/SPI1/CSF1R/LILRB4/CARD8/IL2RB/CCR4/CD300LF/IL2RA/CXCR6/CD74/TRAF1/TNFRSF14/LILRB1/EBI3/TNFSF13B/CCRL2/STAP1/CX3CR1/FCER1G/CSF2RB/STAT5A/CMKLR1/TNFRSF17/NR1H3/TNFRSF4/IL12RB1/CXCL12/CXCL13/CCR1/HCK/PTPN6/CCL18/SH2B3/LILRB3/IL18R1/KIT/GSTP1/IL18RAP/STAT4/LILRB2/IL11RA/CCL2/ZBP1/CCR8/IL34/FAS/LIFR/CSF1/SIGIRR/CCL22/CCL5/BIRC3/F…	98		hsa05410	Hypertrophic cardiomyopathy	19/672	90/8170	0.000103167	0.00078149	0.000621717	ATP2A3/ITGB7/ITGA9/ITGA4/TGFB3/DMD/ITGA6/LAMA2/AGT/SGCD/ATP2A1/MYL3/SGCA/MYH7/TPM2/TNNC1/MYL2/DES/ACTC1	19
BP	GO:0097529	myeloid leukocyte migration	64/1211	229/18800	2.03e-24	2.52e-22	1.81e-22	NCKAP1L/SLAMF1/ITGB2/PIK3CG/CCR7/CCR2/CCL19/PREX1/RHOH/VAV1/SPI1/CSF1R/AIF1/CD74/PECAM1/SLAMF8/CD300A/STAP1/CX3CR1/FCER1G/CMKLR1/CD200/CXCL12/CXCL13/CCR1/MCOLN2/PDE4B/C3AR1/CCL18/PLA2G7/KIT/ITGA9/PTGER4/FUT7/CCL2/RARRES2/IL34/CSF1/THBS4/CCL22/CCL5/PDGFD/MPP1/RAC2/CSF3R/CXCL9/CCL21/C5AR1/CCL17/EMILIN1/CCL13/JAM3/IL1A/SLIT2/CX3CL1/S100A12/CTSG/S100A14/CCL8/CXCL10/S100A7/S100A9/S100A8/CXCL11	64		hsa05412	Arrhythmogenic right ventricular cardiomyopathy	17/672	77/8170	0.000132551	0.000979582	0.00077931	ATP2A3/ITGB7/ITGA9/ITGA4/JUP/DMD/LEF1/ITGA6/LAMA2/DSP/SGCD/ATP2A1/DSC2/GJA1/SGCA/ACTN2/DES	17
BP	GO:0002685	regulation of leukocyte migration	62/1211	218/18800	3.86e-24	4.68e-22	3.37e-22	NCKAP1L/SLAMF1/GPSM3/CCR7/CCR2/CXCR3/CCL19/RHOH/SPI1/DOCK8/CSF1R/AIF1/GPR18/CD74/TNFRSF14/SLAMF8/CD300A/STAP1/CX3CR1/SPN/CMKLR1/LGALS9/CD200/CXCL12/CXCL13/CCR1/JAM2/C3AR1/PLA2G7/SELP/ITGA4/PTGER4/FUT7/CCL2/RARRES2/IL34/CSF1/THBS4/CCL5/APOD/F2RL1/PDGFD/IL27RA/MPP1/RAC2/SELE/PADI2/CCL21/C5AR1/ICAM1/THY1/EMILIN1/JAM3/IL1A/SLIT2/CX3CL1/S100A14/CCL8/PTN/C10orf99/CXCL10/S100A7	62		hsa04510	Focal adhesion	32/672	201/8170	0.000202291	0.00145938	0.00116102	PARVG/PRKCB/VAV1/FYN/BCL2/ITGB7/COL4A4/ITGA9/ITGA4/THBS4/PDGFRA/PIK3R1/BIRC3/PDGFD/RAC2/ITGA6/LAMA2/VWF/MET/COMP/COL4A6/PDGFRB/CAV1/COL9A2/LAMC2/COL6A2/COL6A3/COL6A1/LAMA3/COL1A2/MYL2/MYLPF	32
BP	GO:1902105	regulation of leukocyte differentiation	71/1211	283/18800	6.82e-24	8.07e-22	5.81e-22	RASSF2/EVI2B/BTK/NCKAP1L/SASH3/CD4/CD28/CD27/CCR2/FCGR2B/TMEM176A/CCL19/FGL2/CD2/PTPRC/RHOH/FCRL3/ZAP70/TMEM176B/HLA-DOA/HCLS1/INPP5D/IRF4/PIK3R6/LILRB4/IL4I1/TESC/TYROBP/CTLA4/IL2RA/CD74/TLR4/LILRB1/SLAMF8/HLA-DRA/IKZF3/LGALS9/CD86/IL12RB1/CCR1/CD83/C1QC/PTPN6/NFAM1/LILRB3/FES/LILRB2/ID2/BTN2A2/MITF/RUNX3/FOXP3/LAG3/TNFSF4/IL34/CSF1/PIK3R1/LEF1/ZEB1/ZNF683/TOX/HLA-DRB1/IFNG/IL7R/MYB/FBN1/IRF1/AX…	71		hsa05202	Transcriptional misregulation in cancer	31/672	193/8170	0.000215282	0.00151698	0.00120684	SPI1/FLI1/ITGAM/CSF1R/IL2RB/LYL1/TRAF1/ITGB7/CD86/MEF2C/FCGR1A/CD14/ID2/MITF/ETV6/HHEX/CD40/LMO2/BIRC3/JUP/MYCN/BCL2A1/GZMB/ARNT2/ZEB1/GADD45G/MET/MMP9/HMGA2/CCNA1/CSF2	31
BP	GO:0002768	immune response-regulating cell surface receptor signaling pathway	77/1211	328/18800	7.51e-24	8.68e-22	6.25e-22	BTK/NCKAP1L/SH2D1A/PRKCB/CD28/ITK/PLCL2/CCR7/BTLA/LAPTM5/FCGR2B/FGR/TRAT1/CD247/PTPRC/UBASH3A/CD79B/VAV1/FCRL3/ZAP70/LAT2/INPP5D/HLA-DPB1/LILRB4/FYN/LPXN/LAX1/LCK/SLA2/SKAP1/TYROBP/CTLA4/BCL2/LILRB1/KLHL6/CD300A/CD19/STAP1/CD8B/CD79A/PTPN22/PRAM1/LCP2/FCER1G/NCR3/CMKLR1/CD8A/MNDA/PDE4B/C3AR1/MS4A1/HCK/PTPN6/FPR3/CD22/NFAM1/KIT/MEF2C/LILRB2/HLA-DQB1/FCN1/BTN2A2/FOXP3/BLK/RFTN1/CD40/FPR1/FCGR3A/C5A…	77		hsa04664	Fc epsilon RI signaling pathway	15/672	68/8170	0.000328598	0.00226284	0.00180021	BTK/ALOX5/VAV1/INPP5D/FYN/ALOX5AP/LCP2/FCER1G/PLA2G4C/PIK3R1/RAC2/FCER1A/PLA2G4F/PLA2G4E/CSF2	15
BP	GO:0070665	positive regulation of leukocyte proliferation	52/1211	158/18800	1.08e-23	1.22e-21	8.78e-22	NCKAP1L/SLAMF1/SASH3/CD28/VCAM1/CORO1A/RASAL3/CCR2/CD6/CCL19/PTPRC/HLA-DMB/CLECL1/FCRL3/CD3E/ZAP70/CSF1R/HLA-DPB1/CD40LG/AIF1/IL2RA/HAVCR2/CD74/HLA-DPA1/BCL2/TLR4/EBI3/TNFSF13B/GPR183/ST6GAL1/PTPN22/CSF2RB/LGALS9/CD86/TNFRSF4/IL12RB1/MEF2C/LILRB2/FOXP3/TNFSF4/CD40/IL34/CSF1/CD209/CCL5/JAK2/IL27RA/TNFRSF13C/FCGR3A/IL1A/CARD11/CSF2	52		hsa04933	AGE-RAGE signaling pathway in diabetic complications	19/672	100/8170	0.000435296	0.002931	0.00233176	PRKCB/VCAM1/PLCB2/CYBB/BCL2/COL4A4/STAT5A/CCL2/PIK3R1/TGFB3/JAK2/SELE/ICAM1/IL1A/AGT/COL4A6/F3/COL3A1/COL1A2	19
BP	GO:0002703	regulation of leukocyte mediated immunity	64/1211	236/18800	1.24e-23	1.37e-21	9.88e-22	BTK/NCKAP1L/WAS/SLAMF1/ITGB2/SASH3/SH2D1A/SLAMF6/CD28/LTA/CCR2/CD84/FCGR2B/TNFRSF1B/FGR/PTPRC/CD96/VAV1/SPI1/ITGAM/PIK3R6/LILRB4/IL4I1/TYROBP/HAVCR2/TLR4/LILRB1/CD300A/HLA-DRA/STAP1/CX3CR1/PRAM1/NCR3/LGALS9/ARID5A/IL12RB1/PTPN6/CD1C/CD1E/IL18R1/KIT/FES/FUT7/FOXP3/C3/LAG3/TNFSF4/BLK/CD40/CD1B/F2RL1/IL27RA/FOXF1/RAC2/HLA-DRB1/ICAM1/CADM1/CR2/IL7R/IL20RB/RAET1G/CD1A/DNASE1L3/SERPINB4	64		hsa05143	African trypanosomiasis	10/672	37/8170	0.000596771	0.0039309	0.00312724	PRKCB/VCAM1/PLCB2/FASLG/FAS/F2RL1/SELE/ICAM1/IFNG/IDO1	10
BP	GO:0097530	granulocyte migration	51/1211	154/18800	2.11e-23	2.28e-21	1.64e-21	NCKAP1L/SLAMF1/ITGB2/PIK3CG/CCR7/CCL19/PREX1/RHOH/VAV1/CSF1R/CD74/PECAM1/SLAMF8/CD300A/FCER1G/CMKLR1/CXCL13/MCOLN2/PDE4B/C3AR1/CCL18/ITGA9/PTGER4/FUT7/CCL2/RARRES2/IL34/CSF1/THBS4/CCL22/CCL5/MPP1/RAC2/CSF3R/CXCL9/CCL21/C5AR1/CCL17/CCL13/JAM3/IL1A/SLIT2/CX3CL1/S100A12/S100A14/CCL8/CXCL10/S100A7/S100A9/S100A8/CXCL11	51		hsa04630	JAK-STAT signaling pathway	26/672	162/8170	0.000688874	0.00444104	0.00353309	IL10RA/IL21R/IL2RG/IL2RB/IL2RA/BCL2/CSF2RB/STAT5A/IL12RB1/PTPN6/STAT4/IL11RA/LIFR/PDGFRA/PIK3R1/JAK2/IL27RA/CSF3R/AOX1/IFNG/IL7R/IL20RB/PDGFRB/FHL1/IL24/CSF2	26
BP	GO:0046631	alpha-beta T cell activation	51/1211	158/18800	7.94e-23	8.41e-21	6.05e-21	DOCK2/NCKAP1L/SASH3/SLAMF6/CD28/ITK/WDFY4/RASAL3/CCR2/BATF/LY9/CCL19/PTPRC/CD3E/ZAP70/IRF4/LILRB4/GPR18/TNFSF8/BCL2/TNFRSF14/LILRB1/EBI3/CD300A/HLA-DRA/GPR183/PTPN22/SPN/LGALS9/CD86/EOMES/NKG7/PLA2G2D/IL12RB1/CD83/IL18R1/PTGER4/FUT7/RUNX3/FOXP3/TNFSF4/JAK2/LEF1/ZNF683/TOX/HLA-DRB1/IFNG/MYB/IRF1/NKX2-3/LGALS7B	51		hsa04512	ECM-receptor interaction	17/672	88/8170	0.000704759	0.00444879	0.00353925	ITGB7/COL4A4/ITGA9/ITGA4/THBS4/ITGA6/LAMA2/VWF/COMP/COL4A6/COL9A2/LAMC2/COL6A2/COL6A3/COL6A1/LAMA3/COL1A2	17
BP	GO:0050920	regulation of chemotaxis	61/1211	225/18800	1.42e-22	1.47e-20	1.06e-20	NCKAP1L/SLAMF1/GPSM3/IL16/CXCR4/CCR7/CCR2/CCL19/SPI1/CSF1R/AIF1/GPR18/CCR4/CD74/SLAMF8/GPR183/STAP1/CX3CR1/ST6GAL1/CMKLR1/LGALS9/CXCL12/CXCL13/CCR1/C3AR1/S1PR1/PLA2G7/CCL2/SEMA4D/RARRES2/IL34/CSF1/PRKD1/THBS4/SEMA3G/PDGFRA/CCL5/F2RL1/ARTN/PDGFD/MPP1/RAC2/PADI2/SMOC2/CCL21/FGF2/FGFR1/C5AR1/ROBO1/SEMA6A/JAM3/SLIT2/SEMA5A/MET/TUBB2B/S100A14/PDGFRB/PTN/CXCL10/S100A7/F3	61		hsa05221	Acute myeloid leukemia	14/672	67/8170	0.000915918	0.00566374	0.00450581	SPI1/ITGAM/CSF1R/PIM2/STAT5A/KIT/FCGR1A/CD14/PIK3R1/JUP/BCL2A1/LEF1/CCNA1/CSF2	14
BP	GO:0051250	negative regulation of lymphocyte activation	51/1211	161/18800	2.08e-22	2.12e-20	1.52e-20	BTK/NCKAP1L/TBC1D10C/LAPTM5/FCGR2B/FGR/FGL2/LST1/INPP5D/LILRB4/SAMSN1/IL4I1/LAX1/TYROBP/CTLA4/IL2RA/HAVCR2/CD74/TNFRSF14/LILRB1/TNFAIP8L2/TIGIT/CD300A/TNFRSF13B/PTPN22/SPN/LGALS9/CD86/PLA2G2D/MNDA/PTPN6/LILRB2/ID2/BTN2A2/RUNX3/FOXP3/PKN1/LAG3/TNFSF4/BLK/MERTK/HLA-DRB1/VSIG4/IL20RB/IRF1/LRRC32/AXL/CTSG/IDO1/LGALS7B/SFRP1	51		hsa04611	Platelet activation	21/672	124/8170	0.00109107	0.00661188	0.0052601	BTK/APBB1IP/FERMT3/PIK3CG/PLCB2/TBXAS1/PIK3R6/FYN/RASGRP2/LCP2/FCER1G/PLA2G4C/PIK3R5/PIK3R1/ADCY6/FCGR2A/VWF/PLA2G4F/PLA2G4E/COL3A1/COL1A2	21
BP	GO:0032946	positive regulation of mononuclear cell proliferation	48/1211	143/18800	2.17e-22	2.17e-20	1.56e-20	NCKAP1L/SLAMF1/SASH3/CD28/VCAM1/CORO1A/RASAL3/CCR2/CD6/CCL19/PTPRC/HLA-DMB/CLECL1/FCRL3/CD3E/ZAP70/HLA-DPB1/CD40LG/AIF1/IL2RA/HAVCR2/CD74/HLA-DPA1/BCL2/TLR4/EBI3/TNFSF13B/GPR183/ST6GAL1/PTPN22/LGALS9/CD86/TNFRSF4/IL12RB1/MEF2C/LILRB2/FOXP3/TNFSF4/CD40/CSF1/CD209/CCL5/JAK2/IL27RA/TNFRSF13C/FCGR3A/IL1A/CARD11	48		hsa00590	Arachidonic acid metabolism	13/672	61/8170	0.00114006	0.0067733	0.00538852	ALOX5/TBXAS1/PLA2G4C/PLA2G2D/PTGDS/PTGIS/GGT5/PLA2G2A/ALOXE3/PLA2G4F/PLA2G4E/AKR1C3/ALOX12B	13
BP	GO:0002429	immune response-activating cell surface receptor signaling pathway	71/1211	300/18800	2.7e-22	2.59e-20	1.86e-20	BTK/NCKAP1L/SH2D1A/PRKCB/CD28/ITK/PLCL2/CCR7/LAPTM5/FCGR2B/FGR/TRAT1/CD247/PTPRC/UBASH3A/CD79B/VAV1/FCRL3/ZAP70/LAT2/INPP5D/HLA-DPB1/LILRB4/FYN/LPXN/LAX1/LCK/SLA2/SKAP1/TYROBP/CTLA4/BCL2/KLHL6/CD300A/CD19/STAP1/CD8B/CD79A/PTPN22/PRAM1/LCP2/FCER1G/NCR3/CMKLR1/CD8A/MNDA/PDE4B/C3AR1/MS4A1/HCK/PTPN6/FPR3/CD22/NFAM1/MEF2C/HLA-DQB1/FCN1/BTN2A2/FOXP3/BLK/RFTN1/FPR1/C5AR1/BTN3A1/HLA-DRB1/BTNL9/IGLL1/THY1…	71		hsa05142	Chagas disease	18/672	102/8170	0.00149732	0.00872476	0.00694101	PLCB2/CD247/CD3E/CD3G/CD3D/TLR4/C1QC/C1QA/C1QB/CCL2/C3/FASLG/FAS/PIK3R1/TGFB3/CCL5/IFNG/PPP2R2C	18
BP	GO:0002757	immune response-activating signal transduction	71/1211	300/18800	2.7e-22	2.59e-20	1.86e-20	BTK/NCKAP1L/SH2D1A/PRKCB/CD28/ITK/PLCL2/CCR7/LAPTM5/FCGR2B/FGR/TRAT1/CD247/PTPRC/UBASH3A/CD79B/VAV1/FCRL3/ZAP70/LAT2/INPP5D/HLA-DPB1/LILRB4/FYN/LPXN/LAX1/LCK/SLA2/SKAP1/TYROBP/CTLA4/BCL2/KLHL6/CD300A/CD19/STAP1/CD8B/CD79A/PTPN22/PRAM1/LCP2/FCER1G/NCR3/CMKLR1/CD8A/MNDA/PDE4B/C3AR1/MS4A1/HCK/PTPN6/FPR3/CD22/NFAM1/MEF2C/HLA-DQB1/FCN1/BTN2A2/FOXP3/BLK/RFTN1/FPR1/C5AR1/BTN3A1/HLA-DRB1/BTNL9/IGLL1/THY1…	71		hsa04668	TNF signaling pathway	19/672	112/8170	0.00181315	0.0103658	0.00824652	VCAM1/LTA/TNFRSF1B/TRAF1/IL18R1/MAP3K14/CCL2/FAS/CSF1/PIK3R1/CCL5/BIRC3/SELE/ICAM1/IRF1/CX3CL1/MMP9/CXCL10/CSF2	19
BP	GO:0002274	myeloid leukocyte activation	61/1211	232/18800	8.01e-22	7.55e-20	5.43e-20	BTK/DOCK2/SLAMF1/ITGB2/PIK3CG/CCR2/CD84/BATF/FCGR2B/FGR/PREX1/CD2/PTPRC/RHOH/SPI1/SYT11/CST7/ITGAM/LAT2/IRF4/LILRB4/AIF1/CD300LF/TYROBP/HAVCR2/CD74/TLR4/CD300A/STAP1/CX3CR1/PRAM1/LCP2/FCER1G/LGALS9/CD200/NR1H3/TLR1/PTPN6/PTGDS/C1QA/KIT/FES/BLK/CSF1/CCL5/F2RL1/JAK2/FOXF1/RAC2/C5AR1/CD93/PLA2G2A/VSIG4/IFNG/NDRG1/CX3CL1/S100A12/CTSG/DNASE1L3/IL33/CSF2	61		hsa04015	Rap1 signaling pathway	30/672	210/8170	0.00193933	0.0108818	0.00865703	APBB1IP/ITGB2/ITGAL/PRKCB/RASGRP3/PLCB2/VAV1/ITGAM/CSF1R/SKAP1/RASGRP2/LCP2/EVL/KIT/CSF1/PRKD1/PDGFRA/PIK3R1/FGF7/PDGFD/TEK/FPR1/RAC2/FGF2/FGFR1/ADCY6/MRAS/LPAR3/MET/PDGFRB	30
BP	GO:0050921	positive regulation of chemotaxis	46/1211	140/18800	4.47e-21	4.14e-19	2.98e-19	NCKAP1L/SLAMF1/GPSM3/IL16/CXCR4/CCR7/CCR2/CCL19/SPI1/CSF1R/AIF1/CCR4/CD74/CX3CR1/CMKLR1/LGALS9/CXCL12/CXCL13/CCR1/C3AR1/S1PR1/PLA2G7/RARRES2/IL34/CSF1/PRKD1/THBS4/CCL5/F2RL1/ARTN/PDGFD/RAC2/SMOC2/CCL21/FGF2/FGFR1/C5AR1/SLIT2/SEMA5A/MET/S100A14/PDGFRB/PTN/CXCL10/S100A7/F3	46		hsa05235	PD-L1 expression and PD-1 checkpoint pathway in cancer	16/672	89/8170	0.00220565	0.0121511	0.00966689	CD4/CD28/BATF/CD247/CD3E/ZAP70/CD3G/CD3D/LCK/PDCD1/TLR4/PTPN6/NFKBIE/PIK3R1/JAK2/IFNG	16
BP	GO:0002237	response to molecule of bacterial origin	76/1211	354/18800	4.86e-21	4.42e-19	3.18e-19	IL10RA/IRF8/VCAM1/LTA/CCR7/CD6/FCGR2B/TNFRSF1B/LY86/CD96/SPI1/CARD8/HAVCR2/TLR4/LILRB1/STAP1/CX3CR1/PTPN22/CSF2RB/LGALS9/CD86/NR1H3/TLR1/ARID5A/CD180/CXCL13/PDE4B/HCK/IL18BP/GSTP1/MEF2C/SELP/LILRB2/CD14/PTGER2/PTGER4/C2/CARD9/CCL2/FOXP3/FASLG/TNFSF4/VIM/SIGIRR/CCL5/IRAK3/GJB6/JAK2/LY96/SELE/CXCL9/GJB2/C5AR1/FMO1/ADM/IL1A/LOXL1/CX3CL1/AXL/LTF/CTSG/LDOC1/IDO1/DIO2/S100A14/AKAP12/CXCL10/S100A7/MAOB/…	76		hsa05133	Pertussis	14/672	76/8170	0.00322919	0.0172489	0.0137224	IRF8/ITGB2/ITGAM/TLR4/C1QC/C1QA/C1QB/CD14/C2/C3/LY96/SERPING1/IL1A/IRF1	14
BP	GO:0050671	positive regulation of lymphocyte proliferation	46/1211	141/18800	6.23e-21	5.56e-19	4e-19	NCKAP1L/SLAMF1/SASH3/CD28/VCAM1/CORO1A/RASAL3/CCR2/CD6/CCL19/PTPRC/HLA-DMB/CLECL1/FCRL3/CD3E/ZAP70/HLA-DPB1/CD40LG/AIF1/IL2RA/HAVCR2/CD74/HLA-DPA1/BCL2/TLR4/EBI3/TNFSF13B/GPR183/PTPN22/LGALS9/CD86/TNFRSF4/IL12RB1/MEF2C/LILRB2/FOXP3/TNFSF4/CD40/CD209/CCL5/JAK2/IL27RA/TNFRSF13C/FCGR3A/IL1A/CARD11	46		hsa04014	Ras signaling pathway	32/672	236/8170	0.00324484	0.0172489	0.0137224	PRKCB/RASGRP3/RASAL3/ZAP70/CSF1R/PLA1A/GNG7/GNG2/RASGRP2/GNGT2/PLA2G4C/PLA2G2D/RGL1/KIT/FASLG/CSF1/PDGFRA/PIK3R1/ETS1/FGF7/PDGFD/TEK/RAC2/FGF2/FGFR1/PLA2G2A/MRAS/TGFA/MET/PLA2G4F/PDGFRB/PLA2G4E	32
BP	GO:0042113	B cell activation	73/1211	336/18800	1.44e-20	1.26e-18	9.08e-19	ITM2A/BTK/NCKAP1L/IRF8/SASH3/PRKCB/CD28/VCAM1/PLCL2/CD27/TBC1D10C/LAPTM5/BATF/FCGR2B/PTPRC/CD79B/FCRL3/SPI1/ZAP70/DOCK10/LAT2/INPP5D/CD40LG/SAMSN1/IL4I1/LAX1/GAPT/TYROBP/CTLA4/LYL1/CD74/BCL2/TLR4/TNFSF13B/SLAMF8/CD300A/IKZF3/GPR183/CD19/TNFRSF13B/CD79A/CD86/TNFRSF4/POU2AF1/MNDA/CD180/MS4A1/PTPN6/MFNG/CD22/NFAM1/KIT/MEF2C/ITGA4/ID2/SH3KBP1/FOXP3/PKN1/TNFSF4/CMTM7/BLK/HHEX/CD40/IL27RA/TNFRSF13C/LEF…	73		hsa04810	Regulation of actin cytoskeleton	30/672	218/8170	0.00344644	0.0180047	0.0143237	NCKAP1L/ITGB2/ARHGEF6/ITGAL/CXCR4/CYFIP2/VAV1/ITGAM/SPATA13/ITGB7/IQGAP2/ITGAX/CXCL12/PIP4K2A/ITGA9/ITGA4/FGD3/PDGFRA/PIK3R1/FGF7/PDGFD/RAC2/FGF2/FGFR1/ARHGEF4/MRAS/ITGA6/PDGFRB/MYL2/MYLPF	30
BP	GO:0071621	granulocyte chemotaxis	43/1211	128/18800	3.28e-20	2.83e-18	2.03e-18	NCKAP1L/SLAMF1/ITGB2/PIK3CG/CCR7/CCL19/PREX1/VAV1/CSF1R/CD74/FCER1G/CMKLR1/CXCL13/PDE4B/C3AR1/CCL18/ITGA9/CCL2/RARRES2/IL34/CSF1/THBS4/CCL22/CCL5/MPP1/RAC2/CSF3R/CXCL9/CCL21/C5AR1/CCL17/CCL13/JAM3/SLIT2/CX3CL1/S100A12/S100A14/CCL8/CXCL10/S100A7/S100A9/S100A8/CXCL11	43		hsa04666	Fc gamma R-mediated phagocytosis	16/672	97/8170	0.00535711	0.0275119	0.0218872	WAS/PRKCB/FCGR2B/PTPRC/VAV1/INPP5D/PLA2G4C/HCK/FCGR1A/NCF1/PIK3R1/RAC2/FCGR3A/FCGR2A/PLA2G4F/PLA2G4E	16
BP	GO:0032496	response to lipopolysaccharide	72/1211	333/18800	3.55e-20	3.01e-18	2.17e-18	IL10RA/IRF8/VCAM1/LTA/CCR7/CD6/TNFRSF1B/LY86/CD96/SPI1/CARD8/HAVCR2/TLR4/LILRB1/STAP1/CX3CR1/PTPN22/CSF2RB/LGALS9/CD86/NR1H3/ARID5A/CD180/CXCL13/PDE4B/HCK/IL18BP/GSTP1/MEF2C/SELP/LILRB2/CD14/PTGER2/PTGER4/C2/CCL2/FOXP3/FASLG/TNFSF4/VIM/SIGIRR/CCL5/IRAK3/GJB6/JAK2/LY96/SELE/CXCL9/GJB2/FMO1/ADM/IL1A/LOXL1/CX3CL1/AXL/LTF/CTSG/LDOC1/IDO1/DIO2/S100A14/AKAP12/CXCL10/S100A7/MAOB/S100A9/IL24/SLPI/CSF2/S1…	72		hsa00565	Ether lipid metabolism	10/672	50/8170	0.0066565	0.0336153	0.0267428	ENPP2/PLA2G4C/PLA2G2D/PLA2G7/CHPT1/PLD4/ENPP6/PLA2G2A/PLA2G4F/PLA2G4E	10
BP	GO:0002687	positive regulation of leukocyte migration	45/1211	141/18800	4.5e-20	3.76e-18	2.7e-18	NCKAP1L/SLAMF1/GPSM3/CCR7/CCR2/CCL19/SPI1/DOCK8/CSF1R/AIF1/CD74/TNFRSF14/CX3CR1/SPN/CMKLR1/LGALS9/CXCL12/CXCL13/CCR1/JAM2/C3AR1/PLA2G7/SELP/ITGA4/FUT7/RARRES2/IL34/CSF1/THBS4/CCL5/F2RL1/PDGFD/RAC2/CCL21/C5AR1/ICAM1/THY1/JAM3/IL1A/CX3CL1/S100A14/CCL8/PTN/CXCL10/S100A7	45		hsa05418	Fluid shear stress and atherosclerosis	20/672	139/8170	0.00955793	0.0474763	0.0377699	VCAM1/BCL2/PECAM1/KLF2/GSTP1/MEF2C/NCF1/CCL2/PIK3R1/RAC2/SELE/ICAM1/CDH5/IFNG/IL1A/NPPC/NQO1/MMP9/CAV1/SDC2	20
BP	GO:0002285	lymphocyte activation involved in immune response	54/1211	201/18800	6.27e-20	5.15e-18	3.71e-18	ITM2A/NCKAP1L/IRF8/APBB1IP/ITGAL/SLAMF6/CD28/PLCL2/CORO1A/BATF/LY9/FCGR2B/CCL19/FGL2/PTPRC/HLA-DMB/SPI1/LCP1/DOCK10/IRF4/CD40LG/GAPT/HAVCR2/CD74/TLR4/LILRB1/HLA-DRA/GPR183/CD19/SPN/FCER1G/LGALS9/CD86/EOMES/NKG7/POU2AF1/CD180/IL12RB1/MFNG/CD1C/IL18R1/PTGER4/FOXP3/TNFSF4/CD40/F2RL1/IL27RA/LEF1/ZNF683/HLA-DRB1/ICAM1/IFNG/MYB/NKX2-3	54		hsa04613	Neutrophil extracellular trap formation	25/672	190/8170	0.0125233	0.0612026	0.0486899	ITGB2/ITGAL/PRKCB/NCF4/PLCB2/TLR7/CYBB/ITGAM/SELPLG/TLR8/TLR4/SIGLEC9/FPR3/FCGR1A/SELP/NCF1/C3/PIK3R1/FPR1/RAC2/FCGR3A/C5AR1/FCGR2A/VWF/CTSG	25
BP	GO:0001909	leukocyte mediated cytotoxicity	43/1211	131/18800	9.06e-20	7.26e-18	5.23e-18	NCKAP1L/SH2D1A/SLAMF6/CORO1A/FCGR2B/PTPRC/VAV1/SPI1/ITGAM/PIK3R6/GZMM/TYROBP/HAVCR2/LILRB1/HLA-DRA/STAP1/CX3CR1/NCR3/LGALS9/NKG7/SLAMF7/IL12RB1/PTPN6/CD1C/CD1E/FCGR1A/LAG3/CD1B/PRF1/F2RL1/CTSH/GZMB/FCGR3A/ULBP2/HLA-DRB1/ICAM1/CADM1/IL7R/RAET1G/CTSG/CD1A/DNASE1L3/SERPINB4	43		hsa04210	Apoptosis	19/672	136/8170	0.0152989	0.0735807	0.0585373	CTSS/TRAF1/BCL2/CSF2RB/MAP3K14/CTSO/FASLG/FAS/PIK3R1/PRF1/BIRC3/CTSH/BCL2A1/GZMB/CTSW/CTSF/TUBA4A/CTSK/GADD45G	19
BP	GO:1903706	regulation of hemopoiesis	76/1211	371/18800	9.14e-20	7.26e-18	5.23e-18	RASSF2/EVI2B/BTK/NCKAP1L/SASH3/CD4/CD28/CD27/CCR2/FCGR2B/TMEM176A/CCL19/FGL2/CD2/PTPRC/RHOH/FCRL3/SPI1/ZAP70/TMEM176B/HLA-DOA/HCLS1/INPP5D/IRF4/PIK3R6/LILRB4/IL4I1/TESC/TYROBP/CTLA4/IL2RA/CD74/TLR4/LILRB1/SLAMF8/HLA-DRA/IKZF3/LGALS9/CD86/IL12RB1/CCR1/CD83/C1QC/PTPN6/NFAM1/LILRB3/MEF2C/FES/LILRB2/ID2/BTN2A2/MITF/RUNX3/FOXP3/LAG3/TNFSF4/IL34/CSF1/PIK3R1/ETS1/LEF1/ZEB1/ZNF683/CSF3R/TOX/HLA-DRB1/IFNG…	76		hsa04072	Phospholipase D signaling pathway	20/672	148/8170	0.018337	0.0868144	0.0690654	PIK3CG/PLCB2/CYTH4/PIK3R6/FYN/FCER1G/PLA2G4C/PIK3R5/KIT/PDGFRA/PIK3R1/PDGFD/ADCY6/MRAS/LPAR3/FCER1A/AGT/PLA2G4F/PDGFRB/PLA2G4E	20
BP	GO:0002699	positive regulation of immune effector process	60/1211	248/18800	1.57e-19	1.23e-17	8.84e-18	BTK/SLAMF1/ITGB2/SASH3/SH2D1A/SLAMF6/CD28/LTA/CCR2/LAPTM5/CD84/FGR/CCL19/PTPRC/HLA-DMB/VAV1/SPI1/ITGAM/TYROBP/CD74/TLR4/TNFRSF14/LILRB1/CD300A/HLA-DRA/STAP1/PTPN22/NCR3/LGALS9/CD86/TNFRSF4/ARID5A/IL12RB1/PTPN6/CD1C/CD1E/IL18R1/KIT/FES/FCN1/FOXP3/C3/LAG3/TNFSF4/BLK/CD40/CD1B/F2RL1/FOXF1/RAC2/SLC7A5/HLA-DRB1/CADM1/IFNG/MYB/RAET1G/GPRC5B/CD1A/KLK7/KLK5	60		hsa04620	Toll-like receptor signaling pathway	15/672	104/8170	0.022455	0.104675	0.0832745	TLR7/TLR8/TLR4/CD86/TLR1/CD14/CD40/PIK3R1/CCL5/LY96/CCL4L2/CXCL9/CTSK/CXCL10/CXCL11	15
BP	GO:0001906	cell killing	51/1211	185/18800	1.99e-19	1.54e-17	1.11e-17	NCKAP1L/SH2D1A/SLAMF6/CORO1A/FCGR2B/PTPRC/VAV1/SPI1/ITGAM/PIK3R6/GZMM/TYROBP/HAVCR2/LILRB1/HLA-DRA/STAP1/LYZ/CX3CR1/NCR3/LGALS9/NKG7/SLAMF7/IL12RB1/PTPN6/CD1C/CD1E/FCGR1A/C3/LAG3/CD1B/PRF1/F2RL1/CTSH/GZMB/FCGR3A/ULBP2/HLA-DRB1/ICAM1/CADM1/IFNG/IL7R/CCL13/RAET1G/LTF/S100A12/CTSG/CD1A/DNASE1L3/PGLYRP4/GNLY/SERPINB4	51		hsa04260	Cardiac muscle contraction	13/672	87/8170	0.0248159	0.113927	0.0906353	ATP2A3/COX7A1/ATP1A2/ATP2A1/MYL3/HRC/MYH7/COX6A2/TPM2/TNNC1/MYL2/CASQ2/ACTC1	13
BP	GO:0045619	regulation of lymphocyte differentiation	50/1211	181/18800	4.1e-19	3.11e-17	2.24e-17	BTK/NCKAP1L/SASH3/CD28/CD27/CCR2/CCL19/FGL2/CD2/PTPRC/RHOH/FCRL3/ZAP70/HLA-DOA/INPP5D/IRF4/PIK3R6/LILRB4/IL4I1/CTLA4/IL2RA/CD74/SLAMF8/HLA-DRA/IKZF3/LGALS9/CD86/IL12RB1/CD83/PTPN6/NFAM1/LILRB2/ID2/BTN2A2/RUNX3/FOXP3/LAG3/TNFSF4/LEF1/ZEB1/ZNF683/TOX/HLA-DRB1/IFNG/IL7R/MYB/IRF1/AXL/CARD11/SFRP1	50		hsa01521	EGFR tyrosine kinase inhibitor resistance	12/672	79/8170	0.0270481	0.122322	0.0973138	PRKCB/BCL2/PDGFRA/PIK3R1/JAK2/PDGFD/FGF2/TGFA/AXL/MET/NRG1/PDGFRB	12
BP	GO:0042102	positive regulation of T cell proliferation	37/1211	103/18800	1.06e-18	7.94e-17	5.72e-17	NCKAP1L/SLAMF1/SASH3/CD28/VCAM1/CORO1A/RASAL3/CCR2/CD6/CCL19/PTPRC/HLA-DMB/CLECL1/CD3E/ZAP70/HLA-DPB1/CD40LG/AIF1/IL2RA/HAVCR2/HLA-DPA1/EBI3/TNFSF13B/PTPN22/LGALS9/CD86/IL12RB1/LILRB2/FOXP3/TNFSF4/CD209/CCL5/JAK2/IL27RA/TNFRSF13C/IL1A/CARD11	37		hsa05162	Measles	18/672	139/8170	0.035573	0.158509	0.126103	SLAMF1/CD28/IL2RG/FCGR2B/TLR7/CD3E/CD3G/CD3D/IL2RB/IL2RA/BCL2/TLR4/STAT5A/FASLG/FAS/CD209/PIK3R1/IL1A	18
BP	GO:1990266	neutrophil migration	41/1211	128/18800	1.79e-18	1.32e-16	9.51e-17	NCKAP1L/ITGB2/PIK3CG/CCR7/CCL19/PREX1/RHOH/VAV1/CD74/PECAM1/SLAMF8/FCER1G/CXCL13/MCOLN2/PDE4B/C3AR1/CCL18/ITGA9/FUT7/CCL2/THBS4/CCL22/CCL5/MPP1/RAC2/CSF3R/CXCL9/CCL21/C5AR1/CCL17/CCL13/JAM3/IL1A/SLIT2/CX3CL1/S100A12/CCL8/CXCL10/S100A9/S100A8/CXCL11	41		hsa00360	Phenylalanine metabolism	4/672	16/8170	0.0371809	0.16094	0.128037	IL4I1/AOC3/MAOB/ALDH3B2	4
BP	GO:0042100	B cell proliferation	36/1211	100/18800	2.88e-18	2.09e-16	1.5e-16	BTK/NCKAP1L/SASH3/PLCL2/FCGR2B/PTPRC/FCRL3/INPP5D/CD40LG/GAPT/TYROBP/CTLA4/CD74/BCL2/TLR4/TNFSF13B/CD300A/IKZF3/GPR183/CD19/TNFRSF13B/CD79A/TNFRSF4/MNDA/CD180/MS4A1/CD22/MEF2C/PKN1/BLK/CD40/TNFRSF13C/LEF1/CR2/IL7R/CARD11	36		hsa00430	Taurine and hypotaurine metabolism	4/672	16/8170	0.0371809	0.16094	0.128037	CDO1/GGT5/FMO1/FMO2	4
BP	GO:0072676	lymphocyte migration	39/1211	119/18800	4.98e-18	3.56e-16	2.57e-16	ITGAL/PIK3CG/CCR7/CCR2/CCL19/ZAP70/DOCK8/AIF1/TNFRSF14/GPR183/ITGB7/SPN/CD200/CXCL12/CXCL13/JAM2/S1PR1/CCL18/ITGA4/FUT7/CCL2/CCL22/CCL5/APOD/ARTN/IL27RA/CH25H/PADI2/CCL21/ICAM1/CCL17/CCL13/MYO1G/CX3CL1/CCL8/C10orf99/CXCL10/S100A7/CXCL11	39		hsa04010	MAPK signaling pathway	33/672	294/8170	0.0404482	0.172617	0.137326	PRKCB/MAP4K1/RASGRP3/CSF1R/RASGRP2/PTPN7/PLA2G4C/ARRB1/KIT/MEF2C/MAP3K14/CD14/FASLG/FAS/CSF1/PDGFRA/TGFB3/FGF7/PDGFD/TEK/RAC2/FGF2/FGFR1/MRAS/TGFA/IL1A/GADD45G/MET/DUSP2/PLA2G4F/PDGFRB/PLA2G4E/EREG	33
BP	GO:0070664	negative regulation of leukocyte proliferation	34/1211	91/18800	6.49e-18	4.59e-16	3.3e-16	BTK/FCGR2B/LST1/INPP5D/LILRB4/IL4I1/TYROBP/CTLA4/IL2RA/HAVCR2/TNFRSF14/LILRB1/CD300A/TNFRSF13B/SPN/LGALS9/CD86/PLA2G2D/MNDA/PTPN6/GSTP1/LILRB2/BTN2A2/FOXP3/PKN1/BLK/HLA-DRB1/VSIG4/IL20RB/LRRC32/IDO1/CCL8/LGALS7B/IL33	34		hsa04360	Axon guidance	22/672	182/8170	0.0429256	0.17969	0.142953	CXCR4/FYN/PLXNC1/CXCL12/DPYSL2/FES/SEMA4D/RHOD/SEMA3G/PIK3R1/EPHA3/RAC2/SLIT3/ROBO1/SEMA6A/SLIT2/SEMA5A/NTN4/MET/NTN1/EPHB3/WNT5B	22
BP	GO:0050851	antigen receptor-mediated signaling pathway	57/1211	244/18800	7.38e-18	5.14e-16	3.7e-16	BTK/NCKAP1L/SH2D1A/PRKCB/CD28/ITK/PLCL2/CCR7/LAPTM5/FCGR2B/TRAT1/CD247/PTPRC/UBASH3A/CD79B/FCRL3/ZAP70/LAT2/INPP5D/HLA-DPB1/LILRB4/FYN/LPXN/LAX1/LCK/SLA2/SKAP1/CTLA4/BCL2/KLHL6/CD300A/CD19/STAP1/CD8B/CD79A/PTPN22/PRAM1/LCP2/CD8A/MNDA/PDE4B/MS4A1/PTPN6/CD22/NFAM1/MEF2C/HLA-DQB1/BTN2A2/FOXP3/BLK/RFTN1/BTN3A1/HLA-DRB1/BTNL9/IGLL1/THY1/CARD11	57		hsa04657	IL-17 signaling pathway	13/672	94/8170	0.0432916	0.17969	0.142953	CCL2/MAPK6/IL17RB/FOSL1/IFNG/CCL17/MMP9/CXCL10/S100A7/S100A9/S100A7A/CSF2/S100A8	13
BP	GO:0032609	interferon-gamma production	38/1211	117/18800	1.88e-17	1.28e-15	9.19e-16	IRF8/SLAMF1/SASH3/SLAMF6/LTA/CCR7/CCR2/LAPTM5/TLR7/CD2/CD96/CD3E/HLA-DPB1/LILRB4/HAVCR2/TLR8/HLA-DPA1/TLR4/LILRB1/EBI3/PTPN22/LGALS9/ARID5A/IL12RB1/PDE4B/IL18R1/CD14/FOXP3/TNFSF4/F2RL1/JAK2/IL27RA/SLC7A5/BTN3A1/HLA-DRB1/IL20RB/AXL/LGALS7B	38		hsa00910	Nitrogen metabolism	4/672	17/8170	0.0455564	0.186535	0.148399	CA12/CA2/CA3/CA9	4
BP	GO:0032649	regulation of interferon-gamma production	38/1211	117/18800	1.88e-17	1.28e-15	9.19e-16	IRF8/SLAMF1/SASH3/SLAMF6/LTA/CCR7/CCR2/LAPTM5/TLR7/CD2/CD96/CD3E/HLA-DPB1/LILRB4/HAVCR2/TLR8/HLA-DPA1/TLR4/LILRB1/EBI3/PTPN22/LGALS9/ARID5A/IL12RB1/PDE4B/IL18R1/CD14/FOXP3/TNFSF4/F2RL1/JAK2/IL27RA/SLC7A5/BTN3A1/HLA-DRB1/IL20RB/AXL/LGALS7B	38
BP	GO:0031349	positive regulation of defense response	62/1211	289/18800	2.29e-17	1.54e-15	1.11e-15	BTK/GPSM3/SH2D1A/SLAMF6/CD28/IL16/PIK3CG/LTA/CCR7/CCR2/TLR7/VAV1/SPI1/PYHIN1/FYN/ALOX5AP/TYROBP/HAVCR2/TLR8/TLR10/TLR4/STAP1/NCR3/NKG7/MNDA/HCK/PLA2G7/MEF2C/FCN1/PTGER4/CARD9/C3/LAG3/TNFSF4/ZBP1/EMILIN2/LPL/CCL5/ETS1/F2RL1/JAK2/NINJ1/PLA2G2A/CADM1/C2CD4B/IFNG/EMILIN1/CX3CL1/RAET1G/S100A12/AGT/GPRC5B/IDO1/EREG/MMP12/GBP5/KLK7/S100A9/IL33/KLK5/S100A8/FABP4	62
BP	GO:0002688	regulation of leukocyte chemotaxis	39/1211	124/18800	2.49e-17	1.65e-15	1.19e-15	NCKAP1L/SLAMF1/GPSM3/CCR7/CCR2/CCL19/SPI1/CSF1R/AIF1/GPR18/CD74/SLAMF8/STAP1/CX3CR1/CMKLR1/LGALS9/CXCL12/CXCL13/CCR1/C3AR1/PLA2G7/CCL2/RARRES2/IL34/CSF1/THBS4/CCL5/F2RL1/MPP1/RAC2/PADI2/CCL21/C5AR1/JAM3/SLIT2/S100A14/PTN/CXCL10/S100A7	39
BP	GO:0050727	regulation of inflammatory response	74/1211	394/18800	4.61e-17	3e-15	2.16e-15	BTK/GPSM3/CD28/IL16/PIK3CG/LTA/CCR7/CCR2/ALOX5/FCGR2B/TLR7/TNFRSF1B/FGR/AKNA/PTPRC/SYT11/CST7/NLRC3/FYN/SIGLEC10/ALOX5AP/IL2RA/TLR10/TLR4/TNFAIP8L2/SLAMF8/STAP1/AOAH/PIK3AP1/CD200/NR1H3/NKG7/PLA2G2D/SERPINF1/HCK/APOE/PLA2G7/GSTP1/NCF1/PTGER4/FUT7/FOXP3/C3/TNFSF4/ZBP1/PTGIS/LPL/CCL5/BIRC3/ETS1/JAK2/NINJ1/TEK/FOXF1/SELE/PLA2G2A/HLA-DRB1/SMPDL3B/C2CD4B/CDH5/IFNG/IL20RB/CX3CL1/S100A12/AGT/MMP9/GPRC5B…	74
BP	GO:0045229	external encapsulating structure organization	64/1211	310/18800	5.23e-17	3.37e-15	2.43e-15	SPOCK2/TNFRSF1B/CTSS/LCP1/ABI3BP/DPT/COL4A4/FBLN5/MFAP4/RAMP2/CYP1B1/ELN/FMOD/COL14A1/PDGFRA/FBLN1/SERPINB5/ENG/FOXF1/SMOC2/CCDC80/OLFML2B/COL23A1/FBLN2/HAS3/FSCN1/DDR2/TPSAB1/EMILIN1/PHLDB2/COL15A1/CTSK/LOXL1/EFEMP2/NTN4/HMCN1/AGT/COMP/MMP9/CTSG/COL4A6/COL8A2/ANTXR1/AEBP1/CRISPLD2/CAV1/TGM1/COL9A2/SFRP2/SULF1/ADAMTS2/COL22A1/MMP12/MMP7/COL8A1/KLK7/COL17A1/KLK5/COL3A1/LOXL4/MMP10/COL1A2/POSTN/COL…	64
BP	GO:0071675	regulation of mononuclear cell migration	37/1211	116/18800	9.77e-17	6.21e-15	4.47e-15	SLAMF1/CCR7/CCR2/SPI1/DOCK8/CSF1R/AIF1/TNFRSF14/SLAMF8/CX3CR1/SPN/CMKLR1/LGALS9/CD200/CXCL12/CXCL13/CCR1/JAM2/C3AR1/PLA2G7/ITGA4/CCL2/RARRES2/IL34/CSF1/CCL5/APOD/PDGFD/IL27RA/PADI2/CCL21/C5AR1/SLIT2/S100A14/C10orf99/CXCL10/S100A7	37
BP	GO:0030198	extracellular matrix organization	63/1211	307/18800	1.26e-16	7.89e-15	5.68e-15	SPOCK2/TNFRSF1B/CTSS/LCP1/ABI3BP/DPT/COL4A4/FBLN5/MFAP4/RAMP2/CYP1B1/ELN/FMOD/COL14A1/PDGFRA/FBLN1/SERPINB5/ENG/FOXF1/SMOC2/CCDC80/OLFML2B/COL23A1/FBLN2/HAS3/FSCN1/DDR2/TPSAB1/EMILIN1/PHLDB2/COL15A1/CTSK/LOXL1/EFEMP2/NTN4/HMCN1/AGT/COMP/MMP9/CTSG/COL4A6/COL8A2/ANTXR1/AEBP1/CRISPLD2/CAV1/COL9A2/SFRP2/SULF1/ADAMTS2/COL22A1/MMP12/MMP7/COL8A1/KLK7/COL17A1/KLK5/COL3A1/LOXL4/MMP10/COL1A2/POSTN/COL10A1	63
BP	GO:0046632	alpha-beta T cell differentiation	36/1211	111/18800	1.39e-16	8.63e-15	6.21e-15	NCKAP1L/SASH3/SLAMF6/ITK/BATF/LY9/CCL19/ZAP70/IRF4/LILRB4/GPR18/TNFSF8/BCL2/HLA-DRA/GPR183/SPN/LGALS9/CD86/EOMES/PLA2G2D/IL12RB1/CD83/IL18R1/PTGER4/FUT7/RUNX3/FOXP3/TNFSF4/LEF1/ZNF683/TOX/HLA-DRB1/IFNG/MYB/IRF1/NKX2-3	36
BP	GO:0043062	extracellular structure organization	63/1211	308/18800	1.48e-16	9.09e-15	6.54e-15	SPOCK2/TNFRSF1B/CTSS/LCP1/ABI3BP/DPT/COL4A4/FBLN5/MFAP4/RAMP2/CYP1B1/ELN/FMOD/COL14A1/PDGFRA/FBLN1/SERPINB5/ENG/FOXF1/SMOC2/CCDC80/OLFML2B/COL23A1/FBLN2/HAS3/FSCN1/DDR2/TPSAB1/EMILIN1/PHLDB2/COL15A1/CTSK/LOXL1/EFEMP2/NTN4/HMCN1/AGT/COMP/MMP9/CTSG/COL4A6/COL8A2/ANTXR1/AEBP1/CRISPLD2/CAV1/COL9A2/SFRP2/SULF1/ADAMTS2/COL22A1/MMP12/MMP7/COL8A1/KLK7/COL17A1/KLK5/COL3A1/LOXL4/MMP10/COL1A2/POSTN/COL10A1	63
BP	GO:0006959	humoral immune response	64/1211	317/18800	1.66e-16	1.01e-14	7.25e-15	SH2D1A/CD28/LTA/CCR7/CCR2/ALOX5/FCGR2B/RNASE6/PTPRC/PDCD1/BCL2/EBI3/GPR183/LYZ/ST6GAL1/POU2AF1/MFAP4/CXCL13/A2M/CD83/C1QC/MS4A1/PTPN6/C1QA/C1QB/MEF2C/HLA-DQB1/FCN1/C2/C7/CCL2/C3/RARRES2/POU2F2/CXCL9/HLA-DRB1/VSIG4/KRT6A/IGLL1/IFNG/CR2/SERPING1/CCL13/LTF/S100A12/CTSG/C8G/PI3/PGLYRP4/GNLY/RNASE7/CXCL10/S100A7/KLK7/S100A9/KLK5/SLPI/WFDC5/WFDC12/WFDC2/KRT1/PRSS3/CXCL14/CXCL11	64
BP	GO:0030593	neutrophil chemotaxis	35/1211	106/18800	1.95e-16	1.17e-14	8.4e-15	NCKAP1L/ITGB2/PIK3CG/CCR7/CCL19/PREX1/VAV1/CD74/FCER1G/CXCL13/PDE4B/C3AR1/CCL18/ITGA9/CCL2/THBS4/CCL22/CCL5/MPP1/RAC2/CSF3R/CXCL9/CCL21/C5AR1/CCL17/CCL13/JAM3/SLIT2/CX3CL1/S100A12/CCL8/CXCL10/S100A9/S100A8/CXCL11	35
BP	GO:0055074	calcium ion homeostasis	81/1211	468/18800	2.12e-16	1.26e-14	9.05e-15	P2RY10/PRKCB/CD52/CXCR4/PIK3CG/CORO1A/GPR65/CCR7/CCR2/CYSLTR1/CXCR3/CCL19/ANXA6/PTPRC/TRPV2/ATP2A3/FYN/GPR18/LCK/CCR4/CXCR6/BCL2/CCRL2/CD19/CX3CR1/CMKLR1/CXCL12/CXCL13/CCR1/CLIC2/MCOLN2/C3AR1/MS4A1/PTPN6/JSRP1/FPR3/S1PR1/APOE/RAMP3/PTGER2/S1PR4/PTGER4/KEL/HERPUD1/FASLG/CCR8/CD40/PRKD1/PDGFRA/CCL5/F2RL1/JAK2/DMD/FPR1/APLNR/NMB/CXCL9/CCL21/FGF2/C5AR1/CDH5/THY1/ADM/CCL13/LPAR3/BNIP3/CX3CL1/AGT/TMEM3…	81
BP	GO:0045765	regulation of angiogenesis	67/1211	345/18800	2.54e-16	1.49e-14	1.07e-14	PRKCB/PPP1R16B/CXCR4/CCR2/ALOX5/CYSLTR1/ENPP2/CYBB/TNFSF12/PIK3R6/VASH1/CX3CR1/KLF2/STAB1/ITGAX/SERPINF1/CXCL13/C3AR1/CHI3L1/RAMP2/VASH2/ACVRL1/CYP1B1/C3/FASLG/PTPRM/CD34/HHEX/PTGIS/CD40/EMILIN2/PRKD1/THBS4/ETS1/JUP/CTSH/RHOJ/ENG/AQP1/NINJ1/TEK/APLNR/SMOC2/FGF2/C5AR1/CDH5/SEMA6A/AMOT/EMILIN1/ADM/TSPAN12/IL1A/DDAH1/SEMA5A/HK2/CLDN5/AGT/HMGA2/HSPB6/DCN/SFRP2/SULF1/CXCL10/SPARC/F3/SFRP1/KRT1	67
BP	GO:0019882	antigen processing and presentation	35/1211	107/18800	2.72e-16	1.57e-14	1.13e-14	WAS/CCR7/WDFY4/FCGR2B/CTSS/CCL19/FGL2/HLA-DMB/HLA-DQA1/HLA-DOA/RAB33A/HLA-DPB1/CD74/HLA-DPA1/HLA-DRA/FCER1G/HLA-DMA/CD8A/CD1C/CD1E/LILRB2/HLA-DQB1/HLA-DOB/RFTN1/CD1B/CD209/HLA-DQB2/CTSH/HLA-DQA2/CTSF/CCL21/HLA-DRB1/ICAM1/HLA-DRB5/CD1A	35
BP	GO:0050672	negative regulation of lymphocyte proliferation	31/1211	84/18800	2.82e-16	1.61e-14	1.16e-14	BTK/FCGR2B/LST1/INPP5D/LILRB4/IL4I1/TYROBP/CTLA4/IL2RA/HAVCR2/TNFRSF14/LILRB1/CD300A/TNFRSF13B/SPN/LGALS9/CD86/PLA2G2D/MNDA/PTPN6/LILRB2/BTN2A2/FOXP3/PKN1/BLK/HLA-DRB1/VSIG4/IL20RB/LRRC32/IDO1/LGALS7B	31
BP	GO:0007162	negative regulation of cell adhesion	62/1211	305/18800	3.54e-16	2e-14	1.44e-14	NCKAP1L/LAPTM5/FCGR2B/AKNA/FGL2/PTPRC/SPI1/ADAMDEC1/ARHGDIB/LILRB4/IL4I1/LPXN/LAX1/CTLA4/IL2RA/HAVCR2/CD74/TNFRSF14/LILRB1/TNFAIP8L2/TIGIT/CD300A/PTPN22/SPN/LGALS9/CD86/PLA2G2D/PLXNC1/CXCL12/PTPN6/FAM107A/SH2B3/LILRB2/ACVRL1/CYP1B1/BTN2A2/RUNX3/SEMA4D/FOXP3/LAG3/TNFSF4/PODXL/FBLN1/PIK3R1/APOD/JAK2/CCL21/HLA-DRB1/VSIG4/SEMA6A/PHLDB2/IL20RB/JAM3/IRF1/SEMA5A/LRRC32/CX3CL1/CTSG/IDO1/ABCA12/LGALS7B/MM…	62
BP	GO:0032945	negative regulation of mononuclear cell proliferation	31/1211	85/18800	4.16e-16	2.33e-14	1.68e-14	BTK/FCGR2B/LST1/INPP5D/LILRB4/IL4I1/TYROBP/CTLA4/IL2RA/HAVCR2/TNFRSF14/LILRB1/CD300A/TNFRSF13B/SPN/LGALS9/CD86/PLA2G2D/MNDA/PTPN6/LILRB2/BTN2A2/FOXP3/PKN1/BLK/HLA-DRB1/VSIG4/IL20RB/LRRC32/IDO1/LGALS7B	31
BP	GO:0006874	cellular calcium ion homeostasis	79/1211	456/18800	4.78e-16	2.64e-14	1.9e-14	P2RY10/PRKCB/CD52/CXCR4/PIK3CG/CORO1A/GPR65/CCR7/CCR2/CYSLTR1/CXCR3/CCL19/ANXA6/PTPRC/TRPV2/ATP2A3/FYN/GPR18/LCK/CCR4/CXCR6/BCL2/CCRL2/CD19/CX3CR1/CMKLR1/CXCL12/CXCL13/CCR1/CLIC2/MCOLN2/C3AR1/MS4A1/PTPN6/JSRP1/FPR3/S1PR1/APOE/RAMP3/PTGER2/S1PR4/PTGER4/KEL/HERPUD1/FASLG/CCR8/CD40/PRKD1/PDGFRA/CCL5/F2RL1/JAK2/DMD/FPR1/APLNR/NMB/CXCL9/CCL21/FGF2/C5AR1/CDH5/THY1/ADM/CCL13/LPAR3/BNIP3/CX3CL1/AGT/TMEM3…	79
BP	GO:0002706	regulation of lymphocyte mediated immunity	45/1211	175/18800	4.83e-16	2.64e-14	1.9e-14	BTK/NCKAP1L/WAS/SLAMF1/SASH3/SH2D1A/SLAMF6/CD28/LTA/CCR2/FCGR2B/TNFRSF1B/PTPRC/CD96/VAV1/PIK3R6/LILRB4/IL4I1/HAVCR2/LILRB1/HLA-DRA/NCR3/LGALS9/ARID5A/IL12RB1/PTPN6/CD1C/CD1E/IL18R1/FUT7/FOXP3/C3/LAG3/TNFSF4/CD40/CD1B/IL27RA/HLA-DRB1/CADM1/CR2/IL7R/IL20RB/RAET1G/CD1A/SERPINB4	45
BP	GO:0007204	positive regulation of cytosolic calcium ion concentration	64/1211	325/18800	5.95e-16	3.22e-14	2.32e-14	P2RY10/CD52/CXCR4/PIK3CG/CORO1A/GPR65/CCR7/CCR2/CYSLTR1/CXCR3/CCL19/PTPRC/TRPV2/FYN/GPR18/LCK/CCR4/CXCR6/BCL2/CCRL2/CD19/CX3CR1/CMKLR1/CXCL13/CCR1/CLIC2/MCOLN2/C3AR1/MS4A1/PTPN6/JSRP1/FPR3/S1PR1/RAMP3/PTGER2/S1PR4/PTGER4/FASLG/CCR8/PRKD1/PDGFRA/F2RL1/JAK2/DMD/FPR1/APLNR/NMB/CXCL9/CCL21/FGF2/C5AR1/THY1/ADM/LPAR3/CX3CL1/AGT/TMEM38A/CAV1/CASQ1/ATP1A2/CXCL10/HRC/CASQ2/CXCL11	64
BP	GO:1901342	regulation of vasculature development	67/1211	351/18800	6.28e-16	3.36e-14	2.42e-14	PRKCB/PPP1R16B/CXCR4/CCR2/ALOX5/CYSLTR1/ENPP2/CYBB/TNFSF12/PIK3R6/VASH1/CX3CR1/KLF2/STAB1/ITGAX/SERPINF1/CXCL13/C3AR1/CHI3L1/RAMP2/VASH2/ACVRL1/CYP1B1/C3/FASLG/PTPRM/CD34/HHEX/PTGIS/CD40/EMILIN2/PRKD1/THBS4/ETS1/JUP/CTSH/RHOJ/ENG/AQP1/NINJ1/TEK/APLNR/SMOC2/FGF2/C5AR1/CDH5/SEMA6A/AMOT/EMILIN1/ADM/TSPAN12/IL1A/DDAH1/SEMA5A/HK2/CLDN5/AGT/HMGA2/HSPB6/DCN/SFRP2/SULF1/CXCL10/SPARC/F3/SFRP1/KRT1	67
BP	GO:0043588	skin development	60/1211	296/18800	1.23e-15	6.51e-14	4.69e-14	LTB/BCL2/SFN/KRT17/JUP/FGF7/GJB3/KRT6A/TXNIP/IGFBP5/TMEM79/KRT6B/IL1A/SPRR1B/ITGA6/KRT16/TP63/TNFRSF19/ALOXE3/MET/COMP/CDH3/SPRR2D/KRT5/DSP/ABCA12/HOXC13/OVOL1/IVL/LGR5/KRT9/TGM1/SPRR1A/KRT6C/SPRR4/FST/EREG/SPRR2A/SPRR2E/ADAMTS2/AKR1C3/SPRR2G/ZBED2/DKK1/SPRR2B/CDH11/S100A7/SPRR2F/LCE3E/ASPRV1/LCE3D/KLK5/COL3A1/COL1A2/KRT1/ALOX12B/CNFN/KRT75/KRT10/CASP14	60
BP	GO:0032729	positive regulation of interferon-gamma production	29/1211	77/18800	1.37e-15	7.18e-14	5.17e-14	IRF8/SLAMF1/SASH3/SLAMF6/LTA/CCR2/TLR7/CD2/CD3E/HLA-DPB1/HAVCR2/TLR8/HLA-DPA1/TLR4/LILRB1/EBI3/PTPN22/LGALS9/ARID5A/IL12RB1/PDE4B/IL18R1/CD14/TNFSF4/F2RL1/JAK2/IL27RA/SLC7A5/BTN3A1	29
BP	GO:0070098	chemokine-mediated signaling pathway	31/1211	89/18800	1.86e-15	9.68e-14	6.97e-14	CXCR4/CCR7/CCR2/CXCR3/CCL19/CCR4/CXCR6/CCRL2/CX3CR1/CMKLR1/CXCL12/CXCL13/CCR1/CCL18/SH2B3/CCL2/CCR8/CCL22/CCL5/SLIT3/PADI2/CXCL9/CCL21/ROBO1/CCL17/CCL13/SLIT2/CX3CL1/CCL8/CXCL10/CXCL11	31
BP	GO:0001910	regulation of leukocyte mediated cytotoxicity	30/1211	85/18800	3.51e-15	1.8e-13	1.3e-13	NCKAP1L/SH2D1A/SLAMF6/FCGR2B/PTPRC/VAV1/SPI1/ITGAM/PIK3R6/TYROBP/HAVCR2/LILRB1/HLA-DRA/STAP1/CX3CR1/NCR3/LGALS9/IL12RB1/CD1C/CD1E/LAG3/CD1B/F2RL1/HLA-DRB1/ICAM1/CADM1/IL7R/CD1A/DNASE1L3/SERPINB4	30
BP	GO:1990868	response to chemokine	32/1211	97/18800	3.92e-15	1.97e-13	1.42e-13	CXCR4/CCR7/CCR2/CXCR3/CCL19/DOCK8/CCR4/CXCR6/CCRL2/CX3CR1/CMKLR1/CXCL12/CXCL13/CCR1/CCL18/SH2B3/CCL2/CCR8/CCL22/CCL5/SLIT3/PADI2/CXCL9/CCL21/ROBO1/CCL17/CCL13/SLIT2/CX3CL1/CCL8/CXCL10/CXCL11	32
