# Supplementary material for: T cell proliferation-related subtypes, prognosis model and characterization of tumor microenvironment in head and neck squamous cell carcinoma
Source: Research Square preprint supplement (doi:10.21203/rs.3.rs-2684988/v1), 2023-03-17
Supplement: Supplementary file 6 [file 7d6e56fed949c189aa033c32.xlsx]

## Sheet: Sheet1
Table S5: Relative Fractions of tumor-infiltrating immune cells of HNSC patients by the CIBERSORT algorithm.
id	Activated.B.cell	Activated.CD4.T.cell	Activated.CD8.T.cell	Activated.dendritic.cell	CD56bright.natural.killer.cell	CD56dim.natural.killer.cell	Eosinophil	Gamma.delta.T.cell	Immature.B.cell	Immature.dendritic.cell	MDSC	Macrophage	Mast.cell	Monocyte	Natural.killer.T.cell	Natural.killer.cell	Neutrophil	Plasmacytoid.dendritic.cell	Regulatory.T.cell	T.follicular.helper.cell	Type.1.T.helper.cell	Type.17.T.helper.cell	Type.2.T.helper.cell
TCGA_TCGA-CV-A463	0.156424	0.622274	0.629985	0.631469	0.695068	0.73412	0.341508	0.637544	0.344336	0.743408	0.641776	0.391163	0.398928	0.776902	0.507005	0.629222	0.513945	0.736282	0.457822	0.523322	0.528011	0.419921	0.566623
TCGA_TCGA-CV-7102	0.169663	0.635446	0.577211	0.640586	0.750515	0.751011	0.260072	0.713938	0.407715	0.792599	0.812327	0.486178	0.53483	0.776056	0.60046	0.73524	0.291355	0.75287	0.704724	0.594007	0.587531	0.360419	0.549726
TCGA_TCGA-BA-A6DL	0.21103	0.582813	0.617498	0.626942	0.715926	0.793071	0.24679	0.617653	0.36518	0.781115	0.593826	0.321274	0.447714	0.750671	0.463447	0.611211	0.495516	0.742229	0.447839	0.54951	0.492434	0.431374	0.515104
TCGA_TCGA-CR-6471	0.317046	0.740941	0.768923	0.660151	0.697119	0.726423	0.377926	0.696346	0.472087	0.780118	0.78999	0.480774	0.597454	0.817305	0.552682	0.740978	0.529775	0.743024	0.652771	0.612024	0.625542	0.419224	0.603963
TCGA_TCGA-CQ-A4CE	0.212584	0.582013	0.699066	0.645254	0.693987	0.76795	0.327955	0.657336	0.372851	0.772227	0.676549	0.405351	0.527838	0.789642	0.481763	0.624517	0.651656	0.804341	0.507286	0.572655	0.544732	0.432903	0.556622
TCGA_TCGA-CQ-5333	0.338183	0.609073	0.845089	0.698283	0.790043	0.723793	0.294289	0.710471	0.542938	0.833918	0.955748	0.572662	0.565659	0.843844	0.621347	0.776092	0.403996	0.756181	0.814882	0.644123	0.628173	0.411764	0.563658
TCGA_TCGA-DQ-7592	0.143983	0.600256	0.631112	0.650617	0.735616	0.790975	0.329468	0.668233	0.363588	0.762163	0.716206	0.45235	0.547387	0.780579	0.552165	0.724446	0.369278	0.751512	0.586231	0.595143	0.541109	0.38311	0.555614
TCGA_TCGA-UF-A71E	0.201504	0.564551	0.525628	0.605787	0.697715	0.746518	0.312776	0.638189	0.195998	0.770059	0.572677	0.445658	0.487788	0.752381	0.51047	0.663315	0.432237	0.735259	0.44488	0.516599	0.478744	0.462252	0.515838
TCGA_TCGA-D6-A6EM	0.412808	0.607511	0.848517	0.648494	0.792596	0.743813	0.339493	0.740357	0.474166	0.805887	0.877321	0.565833	0.607487	0.822342	0.592252	0.747422	0.3912	0.727441	0.701302	0.604632	0.604942	0.401902	0.554079
TCGA_TCGA-CV-7416	0.0977723	0.566707	0.494846	0.614826	0.715051	0.713214	0.36496	0.687709	0.408274	0.763061	0.711524	0.438953	0.524787	0.792914	0.604882	0.684628	0.357679	0.774334	0.651778	0.544529	0.521033	0.358672	0.579543
TCGA_TCGA-CN-4737	0.166929	0.472954	0.495475	0.599479	0.713353	0.779233	0.342836	0.68682	0.376615	0.751016	0.684809	0.423853	0.58333	0.787141	0.550483	0.711798	0.408778	0.813362	0.65496	0.625265	0.545359	0.37129	0.546073
TCGA_TCGA-IQ-A6SH	0.260946	0.555729	0.746407	0.657022	0.787638	0.771726	0.296886	0.711347	0.402928	0.744636	0.772035	0.444436	0.5614	0.795836	0.597496	0.681596	0.42497	0.761744	0.602373	0.56219	0.547624	0.473158	0.570983
TCGA_TCGA-CV-6938	0.203022	0.586618	0.816283	0.668905	0.800536	0.732249	0.357833	0.738507	0.544275	0.814202	0.895145	0.573762	0.51134	0.825148	0.605993	0.681043	0.457615	0.724447	0.719726	0.643895	0.627806	0.465088	0.62858
TCGA_TCGA-CR-7401	0.179031	0.521266	0.589195	0.639858	0.732433	0.753157	0.313211	0.674545	0.351159	0.778532	0.677538	0.428425	0.643775	0.789995	0.562355	0.710904	0.461944	0.773445	0.589149	0.591033	0.575742	0.413955	0.56998
TCGA_TCGA-D6-A6EP	0.233831	0.402905	0.614473	0.53975	0.708327	0.715291	0.322693	0.643616	0.297776	0.678568	0.694765	0.479286	0.506786	0.844536	0.489286	0.699012	0.179497	0.687994	0.462878	0.52924	0.492909	0.347185	0.472332
TCGA_TCGA-UF-A71B	0.259214	0.625489	0.600363	0.675781	0.705769	0.717741	0.30696	0.678223	0.35506	0.802636	0.745376	0.432031	0.521667	0.769716	0.569313	0.684603	0.481824	0.758288	0.585651	0.557766	0.553214	0.400633	0.620184
TCGA_TCGA-CR-7402	0.308646	0.595484	0.618935	0.623237	0.744377	0.691587	0.313042	0.614146	0.471539	0.802263	0.680777	0.37441	0.541228	0.773551	0.526659	0.691038	0.32417	0.779845	0.527501	0.536741	0.572908	0.406405	0.583234
TCGA_TCGA-IQ-A61O	0.191677	0.543393	0.579631	0.655657	0.667154	0.802181	0.445587	0.644673	0.448981	0.730042	0.830997	0.565316	0.569697	0.802881	0.604575	0.765326	0.273602	0.769448	0.755784	0.63974	0.58375	0.316099	0.548252
TCGA_TCGA-IQ-7630	0.098043	0.610437	0.641544	0.674202	0.751673	0.760507	0.363824	0.662374	0.387696	0.773267	0.721348	0.456066	0.468762	0.79537	0.590255	0.696543	0.376041	0.766694	0.623608	0.538846	0.514053	0.357702	0.572305
TCGA_TCGA-CQ-A4CB	0.247016	0.711372	0.573679	0.650759	0.759261	0.75055	0.376415	0.675419	0.439805	0.785265	0.760012	0.458571	0.619619	0.782733	0.611366	0.730702	0.426819	0.786037	0.7175	0.553035	0.573507	0.382154	0.585223
TCGA_TCGA-MT-A67F	0.341676	0.770909	0.929002	0.76495	0.795541	0.697436	0.466436	0.743066	0.585735	0.804007	0.941736	0.58721	0.776624	0.825895	0.629235	0.758456	0.590911	0.814847	0.736666	0.663913	0.679422	0.475115	0.578188
TCGA_TCGA-HD-7832	0.181672	0.641152	0.641517	0.636912	0.749441	0.740319	0.303827	0.704149	0.378902	0.74642	0.744604	0.42406	0.435376	0.78356	0.591136	0.690116	0.39658	0.717242	0.634015	0.54606	0.561969	0.381107	0.624516
TCGA_TCGA-QK-A8Z7	0.189356	0.601384	0.5264	0.571884	0.744779	0.77637	0.296629	0.591381	0.275766	0.661959	0.65111	0.428543	0.431382	0.762257	0.499092	0.637106	0.170108	0.702892	0.417673	0.546546	0.477313	0.341369	0.415119
TCGA_TCGA-BA-4075	0.0592049	0.670719	0.593777	0.723737	0.774418	0.733909	0.326958	0.757698	0.420594	0.816625	0.731655	0.474713	0.562857	0.803789	0.607315	0.723651	0.448381	0.745858	0.657476	0.538416	0.564631	0.338551	0.593479
TCGA_TCGA-CN-4740	0.179337	0.653629	0.721222	0.672256	0.726911	0.749717	0.481166	0.777715	0.479449	0.810111	0.912128	0.594653	0.792472	0.801294	0.626944	0.77211	0.508126	0.789416	0.782717	0.712636	0.63756	0.421573	0.587555
TCGA_TCGA-H7-8502	0.113455	0.686737	0.543278	0.646994	0.744941	0.762271	0.305949	0.659618	0.37236	0.770101	0.697484	0.433544	0.455694	0.791497	0.586775	0.719183	0.347569	0.748049	0.611971	0.566377	0.545443	0.365224	0.589906
TCGA_TCGA-CV-5966	0.205867	0.670201	0.721278	0.664705	0.816887	0.725655	0.406763	0.715936	0.451569	0.798504	0.828768	0.521468	0.489838	0.805173	0.5963	0.740592	0.256173	0.748138	0.654078	0.589062	0.587283	0.400857	0.589468
TCGA_TCGA-BA-5151	0.210196	0.653181	0.626608	0.691919	0.729307	0.719074	0.425086	0.708052	0.457178	0.810262	0.755189	0.492814	0.66531	0.803864	0.561042	0.703797	0.722006	0.7999	0.67731	0.584672	0.566948	0.425932	0.608283
TCGA_TCGA-CV-7410	0.831896	0.751638	0.848978	0.690391	0.709914	0.782812	0.339408	0.712891	0.790288	0.779779	0.92027	0.470129	0.557801	0.845903	0.603339	0.725798	0.424246	0.776706	0.781509	0.652446	0.668671	0.420082	0.588786
TCGA_TCGA-KU-A6H7	0.371265	0.744498	0.858202	0.684777	0.735922	0.800631	0.286329	0.642191	0.456175	0.776752	0.83365	0.49341	0.527699	0.805888	0.589608	0.662084	0.320262	0.711696	0.616435	0.579765	0.623404	0.473147	0.541224
TCGA_TCGA-CN-5360	0.357181	0.655277	0.752791	0.691078	0.724445	0.723405	0.324446	0.691524	0.512823	0.799344	0.888857	0.499748	0.605577	0.810829	0.593283	0.787163	0.38053	0.807322	0.695134	0.663953	0.630705	0.435728	0.567379
TCGA_TCGA-DQ-5631	0.184458	0.542811	0.493754	0.615614	0.733502	0.718347	0.22134	0.610971	0.350169	0.773655	0.605675	0.374759	0.425274	0.822881	0.576136	0.735481	0.233548	0.771293	0.607259	0.509616	0.510131	0.382759	0.48541
TCGA_TCGA-QK-A6V9	0.384657	0.766458	0.810978	0.678875	0.732591	0.709554	0.335917	0.639173	0.447191	0.7725	0.751992	0.436218	0.443829	0.793276	0.556056	0.664262	0.269879	0.726672	0.478702	0.545914	0.574745	0.411929	0.579996
TCGA_TCGA-CV-5430	0.270006	0.691292	0.674293	0.667067	0.703377	0.78895	0.251786	0.68138	0.464821	0.774618	0.755959	0.483844	0.49494	0.816986	0.487968	0.744198	0.275126	0.724207	0.552961	0.59135	0.537384	0.403079	0.482037
TCGA_TCGA-CN-A497	0.220747	0.629794	0.620946	0.682321	0.733761	0.742517	0.421453	0.62343	0.368606	0.869185	0.684337	0.378435	0.56337	0.756065	0.55265	0.693809	0.199715	0.743869	0.557401	0.56071	0.561474	0.380977	0.546202
TCGA_TCGA-CV-7177	0.0886841	0.494276	0.500759	0.629395	0.701618	0.742554	0.360895	0.664421	0.337388	0.762183	0.655967	0.462026	0.544785	0.808059	0.557162	0.675211	0.356906	0.752123	0.588674	0.595164	0.530711	0.381852	0.54101
TCGA_TCGA-CR-7386	0.243787	0.607964	0.753333	0.662421	0.763794	0.749349	0.366842	0.756301	0.518167	0.794617	0.879775	0.533543	0.702999	0.790535	0.629756	0.739386	0.464687	0.781004	0.763733	0.67324	0.649549	0.391825	0.561915
TCGA_TCGA-BA-5153	0.385376	0.789611	0.786366	0.690891	0.732981	0.660481	0.385249	0.613304	0.492268	0.77054	0.802775	0.407288	0.578885	0.793253	0.593676	0.730664	0.20998	0.734117	0.624327	0.568234	0.629626	0.470922	0.595313
TCGA_TCGA-CV-7235	0.23341	0.598956	0.749954	0.609623	0.708171	0.735977	0.446922	0.68903	0.45213	0.781694	0.832727	0.506777	0.594632	0.784055	0.609007	0.737524	0.266842	0.731424	0.681232	0.612563	0.619956	0.443566	0.488265
TCGA_TCGA-BA-5556	0.406438	0.700812	0.847617	0.708663	0.743745	0.758036	0.373483	0.695173	0.549425	0.786615	0.88241	0.463022	0.571183	0.837742	0.601778	0.764368	0.496353	0.744856	0.681569	0.633142	0.642074	0.452151	0.599779
TCGA_TCGA-CN-4742	0.2525	0.575706	0.578363	0.647411	0.715976	0.75327	0.317927	0.693444	0.418891	0.758394	0.73838	0.434076	0.50909	0.796079	0.555972	0.738045	0.623272	0.819485	0.657084	0.618035	0.548274	0.403525	0.545221
TCGA_TCGA-HD-8314	0.233835	0.66849	0.635124	0.613203	0.673827	0.658844	0.237441	0.670734	0.436599	0.725922	0.801741	0.497586	0.549343	0.771176	0.560842	0.749475	0.150894	0.7885	0.648492	0.645987	0.547007	0.410333	0.552145
TCGA_TCGA-HD-7754	0.11328	0.647185	0.523318	0.633384	0.665985	0.682027	0.334189	0.660275	0.390621	0.862626	0.715199	0.512297	0.632638	0.798028	0.519847	0.738087	0.330825	0.776974	0.600692	0.589219	0.51589	0.396468	0.58227
TCGA_TCGA-P3-A6T8	0.129112	0.534698	0.476786	0.668888	0.72699	0.795011	0.252038	0.610306	0.246041	0.738652	0.589887	0.400988	0.52362	0.773575	0.599566	0.717931	0.304783	0.779925	0.556997	0.53426	0.558206	0.366632	0.544453
TCGA_TCGA-CQ-6223	0.208846	0.615943	0.635796	0.693922	0.725439	0.738446	0.412026	0.682688	0.3731	0.792504	0.72008	0.432538	0.605536	0.763414	0.559357	0.636525	0.578716	0.78658	0.583272	0.564904	0.541063	0.474388	0.560585
TCGA_TCGA-CV-5444	0.226748	0.570332	0.714184	0.644088	0.736108	0.742405	0.390967	0.690786	0.476689	0.782398	0.87474	0.493461	0.577703	0.797652	0.599469	0.770229	0.303298	0.775592	0.739928	0.626806	0.608619	0.404054	0.57191
TCGA_TCGA-CN-4726	0.121308	0.60566	0.574006	0.713071	0.729525	0.742106	0.330233	0.729099	0.400235	0.822071	0.721877	0.483987	0.640078	0.788403	0.605328	0.710476	0.652149	0.817001	0.673611	0.624439	0.55308	0.392274	0.561019
TCGA_TCGA-CN-4725	0.125587	0.543959	0.460853	0.582329	0.733036	0.800663	0.27739	0.642734	0.298852	0.777452	0.576425	0.356596	0.551176	0.791334	0.578776	0.667262	0.504039	0.757088	0.548036	0.550207	0.502544	0.381484	0.618676
TCGA_TCGA-CV-A461	0.361549	0.631272	0.868404	0.67163	0.772763	0.697204	0.355419	0.713942	0.518535	0.76895	0.888014	0.481197	0.566286	0.747995	0.553823	0.656254	0.285162	0.743937	0.681086	0.651304	0.591481	0.40466	0.556697
TCGA_TCGA-CV-A6JN	0.238603	0.540632	0.736424	0.682503	0.753388	0.782859	0.407472	0.671539	0.393987	0.751016	0.756743	0.422873	0.545381	0.820022	0.533035	0.622765	0.548861	0.74134	0.562468	0.563099	0.562501	0.433896	0.526035
TCGA_TCGA-P3-A6T5	0.163754	0.52934	0.577257	0.68748	0.703442	0.751183	0.324784	0.680105	0.344713	0.741159	0.695669	0.43541	0.558576	0.793448	0.544686	0.687249	0.597708	0.744458	0.592333	0.578179	0.522993	0.417611	0.51968
TCGA_TCGA-HD-7753	0.163634	0.634371	0.634526	0.668925	0.755262	0.79256	0.290892	0.689659	0.391672	0.75937	0.689764	0.429928	0.578113	0.799271	0.585012	0.727544	0.500535	0.75506	0.61203	0.526106	0.550854	0.413364	0.599051
TCGA_TCGA-CX-7086	0.205107	0.677057	0.572029	0.672548	0.718345	0.734897	0.355716	0.632642	0.379952	0.762092	0.652109	0.386439	0.514837	0.783336	0.474048	0.623979	0.527208	0.735105	0.448999	0.552766	0.484976	0.434997	0.578753
TCGA_TCGA-CV-7568	0.133369	0.589101	0.578373	0.600293	0.709149	0.755832	0.363246	0.641705	0.342248	0.771111	0.621487	0.374084	0.560611	0.750612	0.533116	0.678246	0.480029	0.777907	0.559584	0.516309	0.522185	0.348013	0.61632
TCGA_TCGA-CN-5365	0.211446	0.556021	0.693758	0.727414	0.748195	0.794925	0.330318	0.727591	0.412578	0.777747	0.80714	0.464993	0.469733	0.789711	0.599468	0.660286	0.460519	0.745781	0.651336	0.613325	0.552332	0.425758	0.58826
TCGA_TCGA-CV-7430	0.0431769	0.611857	0.480983	0.639152	0.714953	0.787757	0.331649	0.619413	0.209218	0.75463	0.569869	0.379959	0.491789	0.754632	0.500623	0.659802	0.506658	0.734125	0.45194	0.509808	0.509782	0.499932	0.564052
TCGA_TCGA-CN-5363	0.198994	0.626724	0.709186	0.644231	0.777532	0.733855	0.299235	0.703136	0.463958	0.784158	0.809038	0.48404	0.532203	0.805667	0.568641	0.756855	0.259971	0.737989	0.657822	0.583571	0.593652	0.35403	0.532596
TCGA_TCGA-BA-5559	0.404484	0.764987	0.840777	0.691274	0.725688	0.727631	0.249738	0.646604	0.555695	0.749693	0.931897	0.495621	0.620223	0.827648	0.617415	0.827047	0.153019	0.766942	0.76026	0.602304	0.653873	0.44668	0.569123
TCGA_TCGA-CV-7236	0.158859	0.567944	0.558441	0.638866	0.719246	0.777922	0.388303	0.655129	0.395644	0.781535	0.698043	0.400924	0.51149	0.795439	0.587915	0.74322	0.381327	0.768369	0.628322	0.552167	0.576562	0.393837	0.574559
TCGA_TCGA-CV-7248	0.405095	0.604566	0.692356	0.675431	0.733878	0.725372	0.317274	0.675194	0.514432	0.784625	0.770822	0.446016	0.485532	0.777399	0.561584	0.676954	0.247932	0.764348	0.591331	0.587788	0.557777	0.385439	0.559221
TCGA_TCGA-F7-A50I	0.177333	0.603895	0.638577	0.704111	0.753087	0.821239	0.411382	0.642598	0.334565	0.782165	0.674674	0.42331	0.604075	0.790236	0.572563	0.714767	0.464407	0.792289	0.537714	0.558933	0.555751	0.454693	0.545839
TCGA_TCGA-CV-6955	0.162185	0.58084	0.763087	0.714971	0.705748	0.768512	0.386971	0.667854	0.444493	0.796649	0.753511	0.471622	0.597087	0.805714	0.48012	0.66999	0.583309	0.757373	0.61331	0.632777	0.56742	0.46617	0.563862
TCGA_TCGA-UF-A71A	0.0825462	0.505621	0.485171	0.581938	0.716367	0.771832	0.316785	0.653525	0.216862	0.749276	0.585177	0.478999	0.480802	0.766731	0.52561	0.671506	0.189423	0.750525	0.522572	0.551309	0.479783	0.42663	0.497221
TCGA_TCGA-HD-8635	0.206984	0.520082	0.645725	0.646893	0.716906	0.778478	0.349269	0.688709	0.370108	0.774948	0.709905	0.379172	0.586996	0.781615	0.569908	0.727659	0.498903	0.788075	0.653097	0.566233	0.570266	0.40187	0.527165
TCGA_TCGA-UF-A7JH	0.205415	0.599738	0.698196	0.685872	0.733656	0.806119	0.348762	0.657666	0.410565	0.742185	0.790478	0.486907	0.572053	0.753635	0.577518	0.701141	0.36636	0.772557	0.615959	0.621537	0.546164	0.362865	0.510647
TCGA_TCGA-CV-6962	0.0877273	0.536814	0.4968	0.609296	0.734545	0.735714	0.348608	0.654584	0.142783	0.808175	0.581961	0.387957	0.520287	0.773838	0.493707	0.596746	0.172997	0.721298	0.484328	0.502074	0.500334	0.341665	0.557479
TCGA_TCGA-CN-4736	0.258623	0.562321	0.793248	0.680709	0.768559	0.753211	0.37151	0.729365	0.523975	0.807691	0.889077	0.493059	0.61613	0.811058	0.627107	0.764071	0.387981	0.759137	0.728452	0.673785	0.634204	0.442124	0.562364
TCGA_TCGA-D6-6517	0.325012	0.567774	0.574511	0.667251	0.752363	0.803716	0.253726	0.685326	0.459297	0.767829	0.748109	0.436961	0.468385	0.80114	0.59766	0.725239	0.455823	0.758038	0.655603	0.553315	0.560015	0.420918	0.556267
TCGA_TCGA-CQ-A4C6	0.185416	0.622536	0.682922	0.646405	0.754374	0.773601	0.378209	0.667594	0.42373	0.752507	0.773027	0.419665	0.617415	0.766092	0.56404	0.7014	0.569182	0.781073	0.641579	0.583346	0.557234	0.407311	0.588615
TCGA_TCGA-CR-6491	0.141586	0.591	0.649548	0.673406	0.729113	0.753602	0.265175	0.65501	0.327786	0.729445	0.618435	0.353725	0.510107	0.779935	0.558674	0.669398	0.538937	0.747071	0.514772	0.552765	0.531488	0.425466	0.579226
TCGA_TCGA-CQ-5330	0.296274	0.620528	0.733582	0.638935	0.745314	0.778853	0.328307	0.700102	0.501323	0.79863	0.905779	0.533511	0.503028	0.817312	0.621705	0.807759	0.366361	0.77291	0.791831	0.661931	0.614307	0.396904	0.545726
TCGA_TCGA-CV-A6JY	0.191111	0.50377	0.539123	0.603489	0.693863	0.761639	0.316862	0.661612	0.259396	0.764733	0.592878	0.390403	0.573126	0.776091	0.461277	0.588093	0.529421	0.763996	0.439609	0.572686	0.492812	0.399242	0.54511
TCGA_TCGA-CV-7180	0.139517	0.592622	0.644925	0.607108	0.731884	0.740373	0.388941	0.633598	0.257412	0.784428	0.605914	0.386641	0.554339	0.799921	0.486722	0.609913	0.450733	0.74031	0.48707	0.519483	0.518717	0.412858	0.5936
TCGA_TCGA-CQ-5334	0.244015	0.655105	0.784388	0.658322	0.769149	0.707141	0.257698	0.723902	0.479017	0.784984	0.849048	0.509242	0.515022	0.84098	0.6151	0.727001	0.483858	0.757975	0.720531	0.613245	0.612656	0.438034	0.585672
TCGA_TCGA-CN-5367	0.177688	0.61447	0.542662	0.654834	0.723195	0.755514	0.323324	0.657319	0.409458	0.758474	0.730008	0.437434	0.437154	0.775315	0.578802	0.671221	0.365871	0.733142	0.647003	0.556693	0.532493	0.346219	0.555376
TCGA_TCGA-CR-6484	0.395717	0.697961	0.749462	0.720484	0.724989	0.773005	0.404194	0.722896	0.546064	0.783432	0.920882	0.560805	0.638549	0.812787	0.57904	0.795772	0.552597	0.770739	0.78091	0.669069	0.647473	0.451546	0.563701
TCGA_TCGA-CR-6470	0.641165	0.779028	0.833505	0.719123	0.734745	0.665268	0.373278	0.652487	0.627945	0.754554	0.839654	0.485402	0.57908	0.828437	0.575852	0.800699	0.199013	0.748354	0.670788	0.590341	0.655705	0.412256	0.607468
TCGA_TCGA-CV-7429	0.0976244	0.610085	0.656321	0.669408	0.723704	0.748106	0.388505	0.674228	0.390503	0.791564	0.772412	0.503102	0.470001	0.80476	0.603994	0.717046	0.257993	0.766162	0.642484	0.551852	0.538511	0.389978	0.530609
TCGA_TCGA-CR-7388	0.429047	0.680239	0.663647	0.707594	0.709729	0.728049	0.367924	0.727371	0.513678	0.810452	0.812972	0.487935	0.712049	0.793524	0.572423	0.731292	0.616202	0.830132	0.709485	0.585262	0.604059	0.427093	0.559513
TCGA_TCGA-QK-A8ZB	0.25814	0.536151	0.506618	0.648724	0.736532	0.797788	0.363915	0.691755	0.39601	0.775851	0.65535	0.417199	0.607652	0.761618	0.539963	0.691048	0.561369	0.818656	0.536898	0.571515	0.535858	0.400062	0.552351
TCGA_TCGA-CV-7425	0.27394	0.576763	0.708787	0.665037	0.724693	0.693711	0.284015	0.649527	0.467314	0.776319	0.748656	0.423772	0.545521	0.823534	0.523327	0.632169	0.538167	0.744014	0.607597	0.603612	0.547725	0.413885	0.552615
TCGA_TCGA-BA-5555	0.254326	0.559961	0.648139	0.640162	0.747363	0.71243	0.246017	0.676626	0.407179	0.768391	0.681294	0.394531	0.601913	0.813766	0.542083	0.698179	0.350049	0.736556	0.545941	0.567631	0.541113	0.340955	0.62164
TCGA_TCGA-CN-6995	0.25323	0.629029	0.808317	0.732063	0.762175	0.738425	0.327498	0.724094	0.449892	0.771253	0.844978	0.450825	0.513791	0.782506	0.608464	0.708829	0.399005	0.767579	0.68544	0.571283	0.608494	0.446555	0.549663
TCGA_TCGA-CN-6020	0.198679	0.646561	0.590701	0.693021	0.753148	0.748176	0.418602	0.731325	0.395196	0.790219	0.757838	0.481723	0.627033	0.781533	0.593927	0.749172	0.597748	0.809218	0.619644	0.585795	0.56703	0.452663	0.603393
TCGA_TCGA-CQ-6218	0.19544	0.618869	0.647768	0.623629	0.737646	0.752257	0.401612	0.707098	0.399049	0.755274	0.739193	0.440212	0.646936	0.798831	0.557628	0.705799	0.608306	0.77071	0.627652	0.596036	0.570665	0.44624	0.59455
TCGA_TCGA-CR-6467	0.559118	0.867749	0.861334	0.688307	0.71397	0.761144	0.344818	0.634741	0.593323	0.700981	0.849946	0.46216	0.525352	0.805793	0.580933	0.726382	0.155018	0.738295	0.656776	0.578565	0.610671	0.42745	0.616846
TCGA_TCGA-CV-6933	0.145199	0.558398	0.556404	0.711222	0.734155	0.71891	0.295413	0.748986	0.393649	0.806233	0.845637	0.54888	0.605798	0.798685	0.623483	0.707262	0.402509	0.744313	0.726845	0.63566	0.564033	0.385716	0.572432
TCGA_TCGA-CV-6945	0.0861152	0.508972	0.493651	0.720332	0.716737	0.812846	0.257233	0.676647	0.23394	0.747377	0.586234	0.403891	0.412952	0.789463	0.591038	0.641212	0.417459	0.748612	0.500593	0.538798	0.495603	0.394948	0.51923
TCGA_TCGA-CV-6954	0.191039	0.582461	0.593124	0.635476	0.783015	0.758425	0.352202	0.679689	0.439744	0.786541	0.737096	0.430215	0.480317	0.770047	0.563128	0.726585	0.44339	0.756938	0.57296	0.610616	0.538772	0.440238	0.63794
TCGA_TCGA-UF-A719	0.129063	0.601993	0.592379	0.647451	0.711888	0.757163	0.242324	0.591777	0.373188	0.770921	0.591653	0.414956	0.492636	0.780956	0.548949	0.644988	0.561902	0.723622	0.376182	0.532278	0.507043	0.402642	0.553773
TCGA_TCGA-CN-5370	0.251368	0.672517	0.707575	0.698456	0.778455	0.757309	0.449439	0.754771	0.50577	0.80423	0.9064	0.544993	0.683842	0.795938	0.641577	0.784684	0.476133	0.788363	0.809422	0.644735	0.636619	0.398319	0.577069
TCGA_TCGA-CQ-6221	0.138966	0.484979	0.568073	0.658079	0.666146	0.709719	0.423888	0.775623	0.375921	0.741183	0.791851	0.545108	0.647951	0.812301	0.580527	0.743989	0.232459	0.765375	0.67379	0.546809	0.561935	0.427196	0.592114
TCGA_TCGA-CV-7089	0.218056	0.582876	0.639492	0.6681	0.757715	0.750063	0.320791	0.669107	0.358154	0.791197	0.70569	0.416318	0.603641	0.775659	0.51869	0.680673	0.478266	0.768463	0.598699	0.572148	0.545384	0.454732	0.572807
TCGA_TCGA-CV-7421	0.176703	0.547344	0.550024	0.577355	0.739585	0.78311	0.31646	0.623128	0.283726	0.742931	0.666097	0.453495	0.57522	0.780721	0.548232	0.718822	0.303409	0.769047	0.544189	0.527103	0.53466	0.404444	0.608333
TCGA_TCGA-TN-A7HI	0.523434	0.711221	0.82325	0.683903	0.750671	0.694489	0.388898	0.671158	0.526572	0.7255	0.827711	0.494805	0.608137	0.815209	0.572439	0.71416	0.236166	0.729168	0.563028	0.634376	0.54895	0.434715	0.544492
TCGA_TCGA-IQ-A61E	0.192007	0.694727	0.711155	0.644401	0.768603	0.733268	0.386953	0.665185	0.385119	0.765594	0.743387	0.402977	0.516804	0.769727	0.592114	0.714909	0.464749	0.742772	0.599039	0.561125	0.558003	0.352742	0.59027
TCGA_TCGA-F7-8489	0.306884	0.692127	0.775675	0.679232	0.720269	0.779797	0.412202	0.645448	0.482069	0.782248	0.792468	0.499831	0.523098	0.801352	0.552333	0.739736	0.35078	0.766486	0.634615	0.593389	0.602197	0.451433	0.56659
TCGA_TCGA-CN-A498	0.257227	0.629342	0.607054	0.620554	0.696506	0.787172	0.379009	0.668829	0.389145	0.758304	0.65409	0.422637	0.562288	0.792021	0.557757	0.636477	0.486816	0.762042	0.561282	0.542691	0.54345	0.422579	0.572479
TCGA_TCGA-CR-7369	0.286671	0.67721	0.606155	0.642442	0.718585	0.755171	0.35848	0.649665	0.376977	0.757844	0.68969	0.402076	0.660724	0.778736	0.534368	0.738029	0.415957	0.751757	0.535629	0.575963	0.541499	0.42308	0.6021
TCGA_TCGA-BA-6868	0.136598	0.576985	0.510312	0.650962	0.762473	0.7836	0.24898	0.613271	0.26723	0.750022	0.58623	0.445143	0.475928	0.782264	0.556651	0.711769	0.427999	0.785771	0.598602	0.533479	0.5163	0.377931	0.542421
TCGA_TCGA-CV-A45Z	0.198914	0.573284	0.723211	0.653184	0.74376	0.773586	0.256821	0.66758	0.416779	0.764332	0.752981	0.453945	0.439149	0.789465	0.545792	0.704232	0.343594	0.756435	0.566712	0.594912	0.539894	0.446719	0.532395
TCGA_TCGA-CV-5432	0.169719	0.555909	0.605253	0.650814	0.712862	0.757567	0.196871	0.667723	0.29419	0.73995	0.674773	0.404642	0.452222	0.763354	0.516607	0.64134	0.388537	0.741898	0.519521	0.545198	0.487775	0.381661	0.555105
TCGA_TCGA-RS-A6TO	0.12532	0.591083	0.709709	0.689626	0.707024	0.76525	0.346142	0.710458	0.411032	0.763261	0.804388	0.524343	0.468814	0.778314	0.574687	0.707376	0.319831	0.786172	0.666538	0.603523	0.572451	0.398235	0.5024
TCGA_TCGA-BA-A6DG	0.123375	0.527241	0.656222	0.71912	0.74666	0.833995	0.311306	0.734881	0.370417	0.816803	0.812581	0.541294	0.567707	0.81528	0.626393	0.743144	0.540334	0.843343	0.75271	0.631482	0.603735	0.397819	0.473054
TCGA_TCGA-CR-7380	0.221966	0.552299	0.593535	0.626431	0.77745	0.726297	0.340765	0.752597	0.393053	0.766236	0.728532	0.461502	0.660746	0.811227	0.543653	0.731578	0.356626	0.758001	0.659598	0.602166	0.568724	0.379594	0.584616
TCGA_TCGA-T3-A92N	0.125356	0.623749	0.649964	0.681729	0.754418	0.782805	0.306497	0.658235	0.403876	0.757911	0.743302	0.464053	0.426704	0.768249	0.525192	0.692648	0.345383	0.722487	0.590441	0.523105	0.553921	0.447702	0.573426
TCGA_TCGA-WA-A7H4	0.163617	0.501337	0.594724	0.631045	0.758213	0.725829	0.185006	0.64103	0.336028	0.765804	0.667926	0.388049	0.488232	0.773602	0.531138	0.738645	0.300759	0.790282	0.551261	0.522518	0.535506	0.356857	0.55374
TCGA_TCGA-KU-A66S	0.0506836	0.555109	0.599706	0.668996	0.729561	0.677886	0.378979	0.644328	0.256635	0.706097	0.675739	0.346082	0.587964	0.765846	0.493256	0.690873	0.228069	0.715852	0.513508	0.472076	0.47953	0.363788	0.542065
TCGA_TCGA-CV-5439	0.299355	0.571047	0.658699	0.687258	0.699937	0.761132	0.358302	0.63636	0.408298	0.779099	0.706963	0.394728	0.505835	0.803351	0.531851	0.644567	0.439211	0.71479	0.517458	0.597028	0.565308	0.436549	0.516602
TCGA_TCGA-D6-A6EN	0.367228	0.694029	0.925193	0.711901	0.806697	0.747433	0.404384	0.687988	0.548105	0.793333	0.899178	0.571842	0.617811	0.849176	0.616053	0.760427	0.42524	0.743062	0.685564	0.597436	0.641748	0.455548	0.583244
TCGA_TCGA-CQ-7068	0.322305	0.666646	0.852415	0.707759	0.781148	0.744837	0.320435	0.68182	0.554421	0.775044	0.857231	0.483055	0.485042	0.813297	0.60768	0.729937	0.456933	0.714475	0.650059	0.582701	0.617132	0.435416	0.598241
TCGA_TCGA-CV-5443	0.450462	0.739145	0.792664	0.677702	0.722081	0.712361	0.257374	0.647958	0.526953	0.802055	0.926084	0.498836	0.598296	0.83098	0.617557	0.752832	0.250664	0.73868	0.644558	0.577096	0.636185	0.469983	0.601593
TCGA_TCGA-CX-7219	0.228531	0.672139	0.639826	0.705691	0.702878	0.712178	0.477261	0.708302	0.435337	0.775099	0.814595	0.480439	0.591559	0.800795	0.5948	0.742627	0.497289	0.79342	0.691592	0.620777	0.587202	0.397163	0.582911
TCGA_TCGA-HD-A6I0	0.20267	0.559666	0.758503	0.683838	0.758983	0.739492	0.415037	0.718712	0.362054	0.756294	0.792511	0.482935	0.58673	0.831292	0.53432	0.666708	0.515806	0.718668	0.569177	0.552995	0.557304	0.383547	0.538254
TCGA_TCGA-CV-5978	0.16796	0.5958	0.585802	0.676262	0.761949	0.700519	0.282697	0.742588	0.474694	0.833587	0.870763	0.581095	0.629846	0.798886	0.609023	0.737697	0.262008	0.778908	0.784255	0.653381	0.575538	0.403001	0.558124
TCGA_TCGA-P3-A5QE	0.322262	0.8706	0.844135	0.663061	0.760251	0.687203	0.359686	0.612187	0.481659	0.754074	0.772519	0.403462	0.458352	0.789848	0.51072	0.661155	0.306098	0.74313	0.536819	0.534657	0.578377	0.448488	0.578561
TCGA_TCGA-CR-5250	0.422518	0.733488	0.679293	0.647419	0.753337	0.736644	0.32154	0.591	0.48065	0.776941	0.738465	0.45624	0.596982	0.817224	0.571368	0.75378	0.203354	0.761343	0.562722	0.547912	0.620193	0.484405	0.576008
TCGA_TCGA-P3-A6T7	0.0699171	0.620005	0.633181	0.657737	0.720274	0.764708	0.403974	0.666656	0.294605	0.737879	0.664809	0.436247	0.423874	0.773312	0.520778	0.697156	0.581159	0.772316	0.505152	0.594417	0.526016	0.494743	0.530749
TCGA_TCGA-CN-A6UY	0.3739	0.728572	0.869016	0.723761	0.741012	0.721137	0.256973	0.610168	0.483903	0.757713	0.821544	0.464623	0.532789	0.809349	0.602013	0.697008	0.261307	0.672921	0.642174	0.583237	0.62997	0.505078	0.559728
TCGA_TCGA-P3-A5Q6	0.118857	0.573028	0.537254	0.608862	0.749651	0.784527	0.320213	0.680149	0.329382	0.764913	0.69638	0.471634	0.510405	0.807885	0.561827	0.664651	0.324021	0.742511	0.553411	0.559862	0.540728	0.38677	0.504334
TCGA_TCGA-QK-A652	0.261298	0.563991	0.686837	0.640554	0.73637	0.774698	0.340964	0.698205	0.420978	0.75529	0.747134	0.451463	0.530322	0.773151	0.541558	0.732374	0.612836	0.791068	0.612769	0.620355	0.559566	0.425575	0.53673
TCGA_TCGA-CV-6003	0.202276	0.581235	0.529805	0.660065	0.735516	0.753182	0.252219	0.65552	0.328036	0.743423	0.617941	0.454572	0.477347	0.799955	0.543925	0.63849	0.473338	0.736697	0.555451	0.492461	0.495014	0.380501	0.552494
TCGA_TCGA-CN-A49A	0.152933	0.513894	0.469725	0.572932	0.729842	0.738472	0.294103	0.637788	0.0947553	0.72176	0.549676	0.398852	0.412257	0.749327	0.516812	0.697767	0.339534	0.768397	0.509153	0.517682	0.506601	0.365414	0.637747
TCGA_TCGA-D6-A4Z9	0.21282	0.593187	0.597666	0.630574	0.71431	0.783961	0.279604	0.685642	0.373412	0.76121	0.68023	0.400725	0.543148	0.789609	0.567174	0.72669	0.530499	0.75448	0.579524	0.561025	0.548268	0.426388	0.572557
TCGA_TCGA-H7-8501	0.312357	0.809231	0.924688	0.715721	0.777877	0.696421	0.420069	0.737918	0.557601	0.824737	0.908436	0.543528	0.603175	0.799811	0.67354	0.755301	0.422008	0.753828	0.739346	0.623214	0.663447	0.428491	0.624471
TCGA_TCGA-QK-AA3J	0.261496	0.613065	0.647318	0.580851	0.727244	0.748584	0.310094	0.616872	0.317054	0.776347	0.590334	0.401184	0.508079	0.774505	0.513407	0.684167	0.297886	0.691871	0.350567	0.495083	0.504032	0.379841	0.582566
TCGA_TCGA-CN-4722	0.224498	0.49539	0.594056	0.620603	0.692381	0.751606	0.302034	0.69645	0.397953	0.753813	0.672598	0.36198	0.528636	0.812099	0.48753	0.692311	0.493593	0.784877	0.509285	0.603617	0.565614	0.386281	0.555565
TCGA_TCGA-CR-7390	0.169253	0.61575	0.472007	0.652359	0.701516	0.75358	0.362488	0.701133	0.274667	0.769362	0.621622	0.403576	0.555355	0.76614	0.562129	0.661918	0.557973	0.781265	0.595371	0.537793	0.534127	0.410232	0.578004
TCGA_TCGA-CV-7437	0.116921	0.499417	0.551255	0.646081	0.772994	0.763634	0.27762	0.666208	0.331681	0.801994	0.62785	0.433213	0.468243	0.786925	0.515925	0.662409	0.19445	0.705278	0.551051	0.506856	0.489549	0.386874	0.511791
TCGA_TCGA-CV-A6JZ	0.28876	0.690798	0.866362	0.657253	0.735648	0.773525	0.370098	0.712279	0.520225	0.795776	0.93252	0.555043	0.519138	0.799996	0.585137	0.735374	0.318313	0.761863	0.762237	0.637346	0.631849	0.403517	0.51697
TCGA_TCGA-CN-5373	0.284634	0.626574	0.669849	0.673783	0.706147	0.76706	0.396396	0.725445	0.504175	0.774852	0.824904	0.459519	0.609725	0.799853	0.5761	0.754766	0.618532	0.784033	0.722939	0.648132	0.610536	0.454262	0.583775
TCGA_TCGA-CR-7391	0.343667	0.578985	0.78917	0.683793	0.728672	0.741167	0.297884	0.706566	0.508296	0.833606	0.834437	0.496825	0.706095	0.820022	0.575253	0.751587	0.494475	0.796851	0.718736	0.674995	0.628603	0.424165	0.559887
TCGA_TCGA-BA-6869	0.164069	0.560386	0.649713	0.628616	0.747411	0.769668	0.349172	0.596575	0.307949	0.762951	0.638517	0.414991	0.613939	0.810394	0.541595	0.648122	0.401175	0.740098	0.468882	0.53609	0.546585	0.446396	0.508526
TCGA_TCGA-CV-A6K0	0.290309	0.62655	0.773461	0.663389	0.74265	0.77316	0.393913	0.683152	0.456901	0.815672	0.813908	0.499115	0.560553	0.790141	0.551495	0.7863	0.277321	0.783691	0.65727	0.644164	0.625662	0.388475	0.584239
TCGA_TCGA-CN-A63T	0.233225	0.67749	0.751388	0.68218	0.747234	0.769253	0.342184	0.694614	0.406486	0.793191	0.802165	0.43002	0.543026	0.786072	0.563889	0.702281	0.492098	0.76983	0.625339	0.604305	0.586583	0.471335	0.517237
TCGA_TCGA-UF-A7JF	0.186596	0.557482	0.667069	0.705366	0.729119	0.776801	0.374851	0.650921	0.383874	0.795555	0.746866	0.50619	0.506894	0.793361	0.529767	0.659567	0.405286	0.757238	0.581459	0.574882	0.51111	0.445247	0.496644
TCGA_TCGA-BB-8596	0.231272	0.608162	0.564171	0.632346	0.739872	0.769077	0.456924	0.692599	0.41831	0.79952	0.801625	0.512646	0.649667	0.79691	0.616456	0.761926	0.34425	0.806937	0.71116	0.632633	0.624578	0.376383	0.586809
TCGA_TCGA-CV-A45T	0.604063	0.713333	0.895659	0.685625	0.770071	0.746522	0.391103	0.698046	0.629066	0.790253	0.886099	0.498209	0.638653	0.809397	0.5908	0.778629	0.526305	0.778679	0.666083	0.647622	0.654458	0.399887	0.586612
TCGA_TCGA-D6-6826	0.25132	0.696147	0.631302	0.745509	0.750041	0.741256	0.311301	0.783613	0.481352	0.839031	0.878237	0.58561	0.750032	0.80559	0.603131	0.755532	0.541046	0.875392	0.843069	0.624815	0.599562	0.443152	0.605196
TCGA_TCGA-CR-6493	0.173314	0.578216	0.508926	0.615337	0.746021	0.727861	0.257034	0.661004	0.302813	0.74418	0.629632	0.390671	0.465149	0.801034	0.555874	0.698096	0.426462	0.717848	0.563443	0.509125	0.491948	0.343741	0.572285
TCGA_TCGA-CX-A4AQ	0.726433	0.738213	0.805193	0.693689	0.778119	0.755068	0.360226	0.617214	0.627592	0.716064	0.89995	0.522248	0.470628	0.79661	0.594313	0.734065	0.258701	0.752016	0.657347	0.610709	0.66639	0.4339	0.614724
TCGA_TCGA-CV-6942	0.497862	0.691682	0.826832	0.660073	0.75561	0.74095	0.412326	0.719624	0.641278	0.774841	0.882936	0.530018	0.702773	0.800656	0.609784	0.758016	0.442785	0.775477	0.712927	0.5845	0.643439	0.388954	0.584164
TCGA_TCGA-CQ-6228	0.273146	0.647263	0.524806	0.624023	0.726931	0.760584	0.335641	0.617895	0.3777	0.772611	0.670484	0.452355	0.559862	0.766253	0.5499	0.673322	0.308368	0.731238	0.531971	0.551265	0.524792	0.383538	0.510111
TCGA_TCGA-HD-A634	0.131172	0.596636	0.517537	0.537712	0.649179	0.716441	0.317368	0.611513	0.160371	0.712627	0.50048	0.363742	0.327483	0.809263	0.428272	0.640537	0.0908364	0.730889	0.399511	0.384815	0.448596	0.418087	0.556376
TCGA_TCGA-CQ-6219	0.241798	0.638734	0.808911	0.6975	0.767925	0.71651	0.372218	0.701381	0.485307	0.778134	0.85985	0.490977	0.54963	0.792388	0.602118	0.748092	0.422745	0.765869	0.725363	0.607301	0.604666	0.42409	0.571908
TCGA_TCGA-F7-A50G	0.223281	0.590515	0.717165	0.705322	0.753624	0.762932	0.33036	0.713314	0.448067	0.789237	0.7845	0.459615	0.628986	0.794868	0.563148	0.69373	0.630569	0.791436	0.643651	0.63711	0.56882	0.441131	0.576509
TCGA_TCGA-CQ-A4CA	0.288751	0.596718	0.781377	0.689698	0.762814	0.784676	0.30474	0.71147	0.464925	0.79954	0.843182	0.481576	0.575596	0.805333	0.575359	0.759736	0.365147	0.749	0.6969	0.613064	0.598123	0.437531	0.575093
TCGA_TCGA-F7-A61W	0.101254	0.53439	0.490343	0.585471	0.738338	0.750512	0.354102	0.628535	0.277729	0.766858	0.55531	0.372773	0.494049	0.768565	0.526652	0.685624	0.377847	0.741825	0.476858	0.503218	0.474544	0.33942	0.612095
TCGA_TCGA-CV-6950	0.098935	0.576085	0.581903	0.631457	0.733541	0.783391	0.29788	0.709796	0.38629	0.746478	0.718686	0.410181	0.532928	0.792728	0.612197	0.752669	0.347292	0.771697	0.592167	0.559167	0.561358	0.397263	0.560336
TCGA_TCGA-CV-6441	0.0280499	0.592998	0.561432	0.62028	0.766553	0.808579	0.214691	0.574325	0.315114	0.768547	0.588306	0.376754	0.376721	0.808346	0.518925	0.656922	0.199376	0.681482	0.383807	0.471897	0.472842	0.426286	0.562817
TCGA_TCGA-BB-A5HZ	0.160267	0.497817	0.57217	0.656371	0.715764	0.795582	0.382943	0.659273	0.23591	0.714635	0.614551	0.365839	0.56667	0.776997	0.507599	0.643998	0.468414	0.776704	0.475288	0.535703	0.507181	0.371146	0.523878
TCGA_TCGA-CN-A6V3	0.286436	0.631455	0.686262	0.720709	0.740827	0.774492	0.299652	0.673479	0.421158	0.774031	0.733679	0.40333	0.460392	0.772798	0.577959	0.64646	0.444976	0.741514	0.594125	0.540669	0.54735	0.428896	0.52923
TCGA_TCGA-MT-A7BN	0.333601	0.610565	0.774742	0.674533	0.73974	0.757024	0.451303	0.693035	0.415968	0.745127	0.877379	0.525048	0.672361	0.808809	0.571563	0.695551	0.260628	0.764517	0.673523	0.571276	0.599046	0.421943	0.525816
TCGA_TCGA-CQ-5324	0.212739	0.581669	0.658084	0.664271	0.735137	0.763289	0.366598	0.650352	0.376591	0.78853	0.72345	0.472411	0.536674	0.81024	0.564614	0.728552	0.393005	0.74871	0.590507	0.568303	0.552758	0.41116	0.587133
TCGA_TCGA-CX-7085	0.480745	0.687126	0.767959	0.715679	0.739323	0.739224	0.518181	0.738798	0.594893	0.833982	0.919748	0.553326	0.818347	0.834406	0.632032	0.797112	0.714545	0.85781	0.800623	0.701918	0.680246	0.454422	0.595752
TCGA_TCGA-BA-A4II	0.207208	0.660137	0.672479	0.698461	0.694193	0.774386	0.394759	0.71366	0.376414	0.784769	0.730051	0.413637	0.549172	0.788815	0.574797	0.656971	0.53035	0.764824	0.604861	0.58629	0.546589	0.448083	0.574628
TCGA_TCGA-HD-7229	0.264087	0.593469	0.695523	0.6447	0.761061	0.736133	0.312278	0.681797	0.45282	0.761409	0.756266	0.41036	0.574745	0.790914	0.562386	0.672526	0.450027	0.759099	0.592184	0.540631	0.540077	0.424347	0.54906
TCGA_TCGA-CR-7397	0.213536	0.577046	0.611098	0.658082	0.714849	0.730473	0.340908	0.686338	0.390566	0.796255	0.78396	0.461731	0.615684	0.78844	0.577808	0.723117	0.404347	0.791219	0.677193	0.628242	0.592762	0.394706	0.55546
TCGA_TCGA-CV-7250	0.189398	0.592831	0.626218	0.676048	0.728396	0.741729	0.272719	0.656314	0.375301	0.79777	0.683663	0.368002	0.442457	0.782775	0.512701	0.681738	0.387631	0.735554	0.532751	0.585217	0.519689	0.467429	0.528336
TCGA_TCGA-D6-8568	0.22277	0.693929	0.578828	0.692894	0.74642	0.77737	0.473239	0.699065	0.38652	0.79381	0.732466	0.454894	0.741426	0.787272	0.608084	0.736609	0.548051	0.810805	0.654067	0.601139	0.581389	0.434696	0.585258
TCGA_TCGA-CR-6478	0.439818	0.737474	0.821756	0.712516	0.774387	0.76542	0.3437	0.765438	0.603418	0.806806	0.951628	0.55159	0.644494	0.847124	0.666695	0.744429	0.485536	0.767855	0.770996	0.629601	0.648062	0.443555	0.570185
TCGA_TCGA-CV-A45O	0.0968631	0.508619	0.644277	0.684827	0.726105	0.776248	0.434304	0.683076	0.391171	0.784121	0.746313	0.456777	0.57942	0.809297	0.533072	0.665687	0.739674	0.794326	0.595766	0.637996	0.550853	0.44179	0.553288
TCGA_TCGA-CN-6021	0.307637	0.589934	0.610798	0.640168	0.699547	0.751405	0.300649	0.66188	0.375308	0.778375	0.681189	0.463513	0.543775	0.83079	0.484838	0.669463	0.405994	0.771139	0.525907	0.60553	0.513398	0.437301	0.550488
TCGA_TCGA-T2-A6X2	0.200905	0.550721	0.728435	0.660009	0.71744	0.735682	0.312752	0.680966	0.425363	0.754228	0.76996	0.434228	0.430536	0.800874	0.553292	0.676373	0.446255	0.752008	0.604754	0.572322	0.569358	0.407563	0.550178
TCGA_TCGA-CQ-5329	0.176454	0.674835	0.696625	0.668588	0.782992	0.718846	0.267344	0.716004	0.472624	0.772105	0.841738	0.484629	0.530515	0.802275	0.59917	0.734733	0.379941	0.734203	0.693061	0.581147	0.550802	0.379491	0.548646
TCGA_TCGA-CN-6019	0.242823	0.547881	0.718027	0.690356	0.721751	0.71333	0.418579	0.726089	0.466097	0.826222	0.926296	0.572004	0.823335	0.814668	0.616651	0.779516	0.284994	0.798356	0.796542	0.69476	0.6291	0.394302	0.510286
TCGA_TCGA-CV-A45V	0.159993	0.588511	0.713791	0.666294	0.733041	0.74071	0.340677	0.712182	0.404885	0.795591	0.742061	0.456001	0.642514	0.783669	0.519864	0.724596	0.557991	0.758642	0.603872	0.59816	0.573608	0.396846	0.559878
TCGA_TCGA-BA-7269	0.170428	0.510824	0.649181	0.62993	0.742757	0.820726	0.346044	0.648067	0.272045	0.759192	0.676273	0.510219	0.566033	0.834354	0.550269	0.69402	0.32862	0.739243	0.534517	0.542472	0.56166	0.451424	0.509037
TCGA_TCGA-CR-6477	0.25956	0.565019	0.611827	0.728445	0.741449	0.767961	0.318322	0.764949	0.470294	0.75418	0.847451	0.485759	0.599521	0.829173	0.617242	0.74842	0.425567	0.764045	0.771427	0.640436	0.588692	0.425092	0.549238
TCGA_TCGA-CR-6487	0.585344	0.872182	0.928584	0.700349	0.744106	0.676053	0.427514	0.676317	0.710845	0.773015	0.916286	0.552761	0.676518	0.828049	0.592898	0.766683	0.167845	0.780594	0.718466	0.660286	0.665864	0.366254	0.601782
TCGA_TCGA-CQ-5327	0.292502	0.638728	0.785667	0.685775	0.760816	0.747768	0.314399	0.712994	0.492598	0.78308	0.869165	0.516646	0.509947	0.832143	0.591269	0.74401	0.536533	0.774003	0.659827	0.628142	0.604616	0.432602	0.556825
TCGA_TCGA-CR-5243	0.316826	0.712137	0.713218	0.669666	0.723046	0.705007	0.232941	0.619133	0.428018	0.772878	0.740646	0.413664	0.566827	0.798323	0.604851	0.735825	0.241173	0.732332	0.606045	0.571163	0.621457	0.391276	0.610321
TCGA_TCGA-BB-4225	0.395326	0.811512	0.858113	0.706855	0.765109	0.734514	0.41043	0.603092	0.516554	0.764388	0.812979	0.470419	0.697157	0.83938	0.613182	0.711489	0.198865	0.733142	0.629932	0.622879	0.620073	0.427465	0.630157
TCGA_TCGA-CV-6948	0.130402	0.656377	0.683383	0.626169	0.750186	0.718762	0.234984	0.66216	0.367332	0.786391	0.698699	0.460598	0.408268	0.776635	0.509684	0.642015	0.168123	0.701875	0.540429	0.5303	0.510287	0.339222	0.445117
TCGA_TCGA-UF-A7JC	0.0866038	0.5791	0.460321	0.611277	0.710088	0.769603	0.339168	0.666683	0.231706	0.733425	0.530738	0.327061	0.519055	0.78335	0.500461	0.625287	0.577917	0.765364	0.467273	0.544497	0.4885	0.403155	0.573892
TCGA_TCGA-CV-5976	0.115225	0.51398	0.538689	0.606707	0.740241	0.717554	0.368263	0.667085	0.319493	0.753669	0.643993	0.382601	0.426417	0.790938	0.568513	0.744576	0.332151	0.755868	0.575185	0.543063	0.524689	0.398598	0.543853
TCGA_TCGA-MZ-A6I9	0.403505	0.586431	0.637597	0.66945	0.692667	0.804391	0.280931	0.615771	0.33647	0.748381	0.645444	0.347886	0.475802	0.809466	0.453508	0.654649	0.262777	0.751515	0.460633	0.520684	0.511473	0.414035	0.515695
TCGA_TCGA-BA-4077	0.213872	0.647473	0.731091	0.675657	0.760498	0.750779	0.328745	0.691031	0.45052	0.847104	0.807849	0.523144	0.576105	0.790591	0.612407	0.743751	0.409902	0.752183	0.670902	0.57348	0.599515	0.494968	0.614122
TCGA_TCGA-CR-7371	0.260123	0.693244	0.690224	0.713057	0.726641	0.757143	0.349282	0.708852	0.438735	0.788758	0.787452	0.495171	0.658949	0.816247	0.518693	0.731051	0.514785	0.806013	0.653869	0.597877	0.597441	0.445295	0.577639
TCGA_TCGA-CQ-A4CH	0.158321	0.571791	0.496141	0.650737	0.748178	0.73	0.3286	0.687323	0.338496	0.788233	0.684181	0.452784	0.544286	0.788096	0.57763	0.688607	0.516153	0.771129	0.62484	0.560975	0.538301	0.407184	0.535808
TCGA_TCGA-CV-6436	0.287355	0.602525	0.864641	0.691157	0.761054	0.748964	0.353487	0.742237	0.427445	0.794195	0.848924	0.484827	0.535988	0.81502	0.557777	0.677242	0.54141	0.77064	0.583119	0.620918	0.577739	0.451169	0.563482
TCGA_TCGA-BA-4074	0.201288	0.682998	0.624515	0.679408	0.76543	0.755205	0.294182	0.720605	0.350736	0.789918	0.694562	0.477733	0.537277	0.767247	0.604679	0.688234	0.337797	0.714533	0.605145	0.535549	0.592411	0.400074	0.642646
TCGA_TCGA-QK-A64Z	0.0724821	0.526489	0.61392	0.646299	0.754965	0.784041	0.289943	0.601856	0.314513	0.761084	0.65743	0.41841	0.43858	0.767281	0.52023	0.692001	0.288102	0.749914	0.587285	0.509459	0.536343	0.422297	0.565721
TCGA_TCGA-CN-6989	0.180869	0.623587	0.571707	0.721477	0.754087	0.760579	0.387484	0.747049	0.430731	0.773115	0.871378	0.571329	0.637619	0.783408	0.647991	0.749198	0.264868	0.76575	0.789618	0.637521	0.609859	0.368019	0.592652
TCGA_TCGA-CR-7399	0.298783	0.804882	0.837595	0.669994	0.752372	0.687794	0.343916	0.687112	0.49947	0.788869	0.895572	0.553044	0.546213	0.811014	0.593324	0.723356	0.295803	0.7601	0.663258	0.596699	0.632275	0.440122	0.580355
TCGA_TCGA-CN-5359	0.298298	0.708197	0.77275	0.72049	0.716697	0.736025	0.334086	0.731513	0.545043	0.798986	0.908147	0.538787	0.618088	0.801009	0.615146	0.75611	0.552572	0.808809	0.788664	0.65596	0.625869	0.411235	0.5636
TCGA_TCGA-CV-6953	0.280868	0.564834	0.681626	0.69152	0.708635	0.768373	0.404825	0.670257	0.487159	0.748828	0.762383	0.406676	0.543955	0.820336	0.496678	0.649351	0.550065	0.775695	0.594323	0.582695	0.560536	0.415547	0.529436
TCGA_TCGA-CR-6481	0.738159	0.816574	0.904248	0.713601	0.779508	0.754373	0.325201	0.728318	0.753103	0.804873	0.951691	0.564857	0.668945	0.865525	0.6339	0.770277	0.420459	0.769877	0.781471	0.659351	0.696364	0.482041	0.637395
TCGA_TCGA-BB-4227	0.125971	0.66002	0.50336	0.649268	0.739854	0.766202	0.303918	0.721513	0.256949	0.797128	0.646208	0.460159	0.594758	0.795825	0.542388	0.639952	0.471768	0.757803	0.561585	0.540298	0.501786	0.378978	0.558963
TCGA_TCGA-IQ-A61G	0.055983	0.630539	0.568221	0.68682	0.739997	0.748412	0.330966	0.643845	0.285177	0.776457	0.627586	0.399729	0.418526	0.784099	0.560763	0.620752	0.331548	0.69466	0.478596	0.468345	0.507102	0.406135	0.544663
TCGA_TCGA-CV-7413	0.139565	0.498735	0.633913	0.704955	0.745962	0.751913	0.277096	0.72764	0.430903	0.771328	0.765958	0.485052	0.503007	0.802253	0.578286	0.72709	0.507376	0.780841	0.667457	0.601219	0.568784	0.440772	0.518675
TCGA_TCGA-CQ-6229	0.225064	0.582173	0.695227	0.652558	0.735929	0.765304	0.306233	0.684975	0.393788	0.768422	0.69891	0.411171	0.490313	0.768664	0.539908	0.719932	0.640109	0.774261	0.550904	0.595208	0.534255	0.406715	0.559935
TCGA_TCGA-CV-7423	0.123185	0.51929	0.480097	0.652117	0.743289	0.74758	0.318808	0.661419	0.280768	0.745227	0.585335	0.333114	0.531339	0.776997	0.586663	0.705883	0.479504	0.757417	0.529972	0.545153	0.502336	0.425845	0.56038
TCGA_TCGA-CV-7253	0.0385615	0.487317	0.511727	0.583361	0.724633	0.756567	0.339106	0.647038	0.257977	0.762548	0.509791	0.30921	0.490045	0.765933	0.519424	0.635729	0.287804	0.718574	0.437425	0.476149	0.457752	0.380939	0.554745
TCGA_TCGA-BA-A4IH	0.250039	0.755757	0.669332	0.652249	0.746367	0.680734	0.486216	0.610776	0.340436	0.834935	0.670916	0.410003	0.54127	0.761922	0.559495	0.710349	0.421054	0.749275	0.550562	0.53596	0.556836	0.466909	0.674343
TCGA_TCGA-BA-4076	0.0995448	0.577395	0.545967	0.680662	0.776434	0.793646	0.312448	0.705341	0.252316	0.734053	0.583242	0.365956	0.508932	0.796506	0.518977	0.658873	0.432551	0.760006	0.5269	0.547441	0.533954	0.430119	0.531453
TCGA_TCGA-BA-6872	0.156954	0.615343	0.582929	0.637316	0.769542	0.81278	0.32346	0.743896	0.36107	0.7413	0.710679	0.442135	0.609745	0.801074	0.559529	0.717208	0.541796	0.73921	0.586146	0.570277	0.542302	0.454029	0.516437
TCGA_TCGA-CN-4738	0.2537	0.618888	0.693136	0.695013	0.746114	0.752641	0.380733	0.660137	0.446574	0.835908	0.810686	0.474472	0.609048	0.808722	0.54308	0.726919	0.435576	0.797322	0.657942	0.58573	0.576329	0.431262	0.536417
TCGA_TCGA-HD-A633	0.106415	0.62588	0.550916	0.646201	0.764422	0.76849	0.357969	0.655276	0.264315	0.760922	0.644275	0.403618	0.452025	0.785473	0.549283	0.712577	0.455579	0.750252	0.534849	0.53758	0.549513	0.404515	0.549505
TCGA_TCGA-CN-4727	0.144131	0.606109	0.499523	0.630341	0.698775	0.761032	0.327376	0.629728	0.238324	0.772825	0.587241	0.38956	0.511017	0.795196	0.516908	0.696625	0.328469	0.710127	0.520876	0.487349	0.533393	0.453193	0.560643
TCGA_TCGA-CN-6997	0.163023	0.607879	0.530357	0.626328	0.734655	0.767992	0.334642	0.631141	0.313559	0.812576	0.619459	0.46524	0.485181	0.797351	0.541297	0.678202	0.148858	0.734657	0.502817	0.512658	0.48509	0.269463	0.545011
TCGA_TCGA-CV-A45W	0.546199	0.67668	0.765697	0.676559	0.763461	0.715224	0.309831	0.682317	0.604163	0.760235	0.857647	0.537655	0.622604	0.802958	0.555194	0.71875	0.287551	0.774464	0.68423	0.625679	0.575297	0.363348	0.477485
TCGA_TCGA-CR-7370	0.140382	0.573897	0.583687	0.629175	0.716382	0.6908	0.284272	0.651277	0.347035	0.760989	0.66298	0.44062	0.544238	0.780539	0.542821	0.68199	0.144425	0.737446	0.523082	0.563647	0.497943	0.350138	0.594813
TCGA_TCGA-CR-5247	0.132875	0.474735	0.504865	0.606273	0.710688	0.732181	0.219523	0.6594	0.260593	0.755833	0.523302	0.382201	0.513765	0.797294	0.583869	0.694517	0.21583	0.728484	0.521525	0.534583	0.528851	0.312981	0.572946
TCGA_TCGA-CN-A63V	0.154125	0.503441	0.561429	0.673111	0.70031	0.752029	0.269698	0.654446	0.303674	0.775693	0.708125	0.442919	0.510265	0.837548	0.557131	0.714288	0.428978	0.755803	0.62795	0.55077	0.535278	0.39367	0.525372
TCGA_TCGA-CV-7418	0.193472	0.719722	0.693663	0.639956	0.747868	0.735896	0.387094	0.638895	0.323874	0.786105	0.718028	0.477173	0.644339	0.803617	0.526392	0.659535	0.186784	0.751421	0.518603	0.529684	0.546522	0.418422	0.606501
TCGA_TCGA-CR-7398	0.153579	0.604617	0.534724	0.572941	0.715077	0.737171	0.271293	0.656473	0.3523	0.72458	0.679451	0.466852	0.647589	0.814629	0.541989	0.714164	0.222255	0.750459	0.554612	0.580011	0.50278	0.256824	0.594808
TCGA_TCGA-MT-A51X	0.188597	0.5194	0.60336	0.596479	0.730541	0.73517	0.369319	0.651225	0.291927	0.752313	0.605908	0.383728	0.577682	0.78985	0.523699	0.679415	0.56907	0.767571	0.527887	0.555335	0.521552	0.391172	0.564242
TCGA_TCGA-DQ-5624	0.202451	0.583647	0.554046	0.677104	0.756331	0.761274	0.475398	0.666512	0.369769	0.752053	0.690849	0.40871	0.5763	0.803262	0.567444	0.762675	0.518593	0.775212	0.67302	0.600794	0.558703	0.494398	0.560224
TCGA_TCGA-CR-7373	0.303494	0.680057	0.7647	0.670615	0.776176	0.730293	0.379235	0.70242	0.4919	0.788205	0.873508	0.495335	0.595741	0.801865	0.623424	0.745542	0.369342	0.75598	0.695496	0.581523	0.598914	0.401316	0.635067
TCGA_TCGA-CR-7394	0.457274	0.683252	0.86551	0.687291	0.717081	0.750511	0.438198	0.734089	0.60346	0.784763	0.891165	0.48609	0.647317	0.824531	0.573136	0.763927	0.594319	0.816743	0.758884	0.668703	0.6366	0.433521	0.599927
TCGA_TCGA-CV-7428	0.265654	0.614446	0.727422	0.678707	0.750978	0.77577	0.376608	0.686105	0.436658	0.734755	0.77521	0.418089	0.548865	0.798622	0.551689	0.729232	0.439811	0.74273	0.618606	0.586871	0.564856	0.405261	0.534752
TCGA_TCGA-CV-7438	0.201758	0.629273	0.610436	0.672932	0.754413	0.807203	0.318334	0.63962	0.436972	0.773272	0.746494	0.447716	0.436309	0.790441	0.581752	0.79096	0.443184	0.767627	0.660345	0.566977	0.582195	0.383223	0.570868
TCGA_TCGA-CV-A45P	0.112592	0.553435	0.604107	0.629537	0.731536	0.762053	0.358978	0.633194	0.276543	0.76357	0.619893	0.383521	0.528659	0.785156	0.485599	0.636979	0.581995	0.799625	0.515395	0.549456	0.517329	0.451563	0.562913
TCGA_TCGA-CV-5434	0.230271	0.630582	0.616987	0.641282	0.723999	0.724298	0.321774	0.72625	0.38583	0.784158	0.82933	0.536148	0.594478	0.796543	0.616979	0.721625	0.215227	0.758939	0.734879	0.654771	0.576535	0.325505	0.592044
TCGA_TCGA-CV-A6K1	0.193375	0.517074	0.730329	0.645514	0.77275	0.724987	0.321602	0.677829	0.357778	0.773504	0.749095	0.468973	0.523662	0.804428	0.538604	0.669285	0.536019	0.742976	0.514109	0.542249	0.51543	0.422759	0.549242
TCGA_TCGA-CV-5441	0.183566	0.556955	0.693715	0.60867	0.740237	0.780099	0.411651	0.646211	0.328712	0.739657	0.685637	0.373562	0.488314	0.828512	0.495274	0.677999	0.39505	0.748184	0.555044	0.559785	0.530848	0.366866	0.494386
TCGA_TCGA-CR-7395	0.385999	0.652352	0.807613	0.692036	0.756385	0.727319	0.454197	0.731176	0.546663	0.779285	0.873912	0.487909	0.660474	0.830309	0.568091	0.743687	0.537734	0.769352	0.718751	0.628827	0.633588	0.423913	0.633842
TCGA_TCGA-IQ-7632	0.210935	0.618584	0.520657	0.608246	0.717967	0.808632	0.331912	0.63148	0.343584	0.768044	0.590206	0.417275	0.439503	0.804719	0.501706	0.670149	0.532207	0.76528	0.45827	0.523434	0.513612	0.429374	0.57318
TCGA_TCGA-CV-6935	0.157134	0.494814	0.514778	0.612447	0.721814	0.78809	0.361317	0.710374	0.337124	0.750065	0.654723	0.450684	0.538376	0.784993	0.54311	0.6642	0.234046	0.744033	0.587866	0.562371	0.537636	0.35926	0.511608
TCGA_TCGA-CV-7446	0.0770183	0.583718	0.534167	0.640009	0.754009	0.699965	0.424101	0.670237	0.296839	0.817392	0.577407	0.387406	0.48918	0.760162	0.518546	0.700221	0.322119	0.728402	0.537854	0.521579	0.518124	0.382895	0.555178
TCGA_TCGA-CV-7435	0.252998	0.594555	0.57513	0.634991	0.74019	0.704246	0.370017	0.689556	0.463774	0.778001	0.803155	0.483019	0.58861	0.802114	0.60831	0.732199	0.326156	0.750432	0.685383	0.624553	0.599317	0.392056	0.556843
TCGA_TCGA-UF-A7JO	0.233303	0.701346	0.8215	0.740342	0.749887	0.790474	0.399059	0.728108	0.530956	0.797399	0.916375	0.61745	0.493817	0.800165	0.589728	0.721206	0.421774	0.756567	0.767976	0.643463	0.6222	0.441909	0.534351
TCGA_TCGA-CN-4734	0.222564	0.675819	0.779987	0.742429	0.747342	0.760297	0.407615	0.680427	0.487192	0.763268	0.826059	0.440907	0.6076	0.81696	0.587166	0.734565	0.515717	0.751481	0.677288	0.608281	0.611507	0.432173	0.587312
TCGA_TCGA-CR-7404	0.438931	0.740979	0.779444	0.650338	0.699091	0.782392	0.301935	0.685365	0.511903	0.771776	0.833528	0.457908	0.612465	0.813955	0.542366	0.732881	0.276409	0.767103	0.663735	0.590529	0.567924	0.442364	0.546701
TCGA_TCGA-HD-8634	0.204645	0.572844	0.556554	0.645343	0.729368	0.730373	0.329003	0.643863	0.334624	0.791761	0.643601	0.401336	0.513269	0.777021	0.491619	0.64483	0.582159	0.780557	0.491481	0.539488	0.549353	0.445816	0.578539
TCGA_TCGA-CR-6492	0.293269	0.564906	0.630696	0.652424	0.762436	0.742706	0.336847	0.673468	0.421622	0.807779	0.736066	0.44161	0.597153	0.786598	0.51402	0.711813	0.572029	0.786902	0.597166	0.56394	0.541725	0.464313	0.559456
TCGA_TCGA-CV-7406	0.106768	0.544014	0.477416	0.594522	0.686289	0.728678	0.34741	0.622794	0.277677	0.798179	0.596573	0.451018	0.594469	0.800797	0.52921	0.768199	0.193966	0.746927	0.460319	0.538528	0.56089	0.430958	0.614794
TCGA_TCGA-BA-6871	0.30879	0.702205	0.771222	0.603144	0.758351	0.731767	0.276621	0.666847	0.323624	0.718191	0.797531	0.50037	0.621759	0.783816	0.599737	0.718643	0.249363	0.719089	0.643185	0.551749	0.600261	0.400243	0.594035
TCGA_TCGA-CV-7247	0.0659451	0.596065	0.480378	0.586929	0.727334	0.745116	0.231696	0.639344	0.254398	0.762092	0.589056	0.365479	0.427989	0.778937	0.59487	0.703702	0.336814	0.737139	0.46993	0.501044	0.553313	0.39168	0.607412
TCGA_TCGA-H7-A76A	0.631414	0.770995	0.884987	0.704292	0.748618	0.791237	0.3354	0.669057	0.647054	0.800046	0.972093	0.602417	0.655189	0.842864	0.616748	0.775698	0.383505	0.781213	0.748978	0.657614	0.684375	0.433498	0.529016
TCGA_TCGA-CV-A6JU	0.166507	0.479163	0.602949	0.619254	0.7514	0.78155	0.319681	0.624102	0.333175	0.774892	0.667771	0.478744	0.472884	0.817107	0.512269	0.703181	0.142783	0.721017	0.487052	0.545128	0.503537	0.368244	0.441408
TCGA_TCGA-CN-A642	0.198582	0.602607	0.800284	0.705604	0.731039	0.713228	0.278483	0.651061	0.425781	0.772785	0.805507	0.468686	0.483729	0.806585	0.561535	0.718104	0.184278	0.730276	0.595536	0.551268	0.585857	0.373611	0.507983
TCGA_TCGA-CV-A6JM	0.203866	0.548957	0.629986	0.637513	0.728323	0.752329	0.349942	0.667536	0.334391	0.740497	0.768458	0.492633	0.561166	0.816297	0.556238	0.611006	0.424167	0.728608	0.589905	0.540086	0.531765	0.460823	0.462864
TCGA_TCGA-CV-6959	0.245808	0.629452	0.60117	0.675558	0.749982	0.719709	0.366588	0.705986	0.422224	0.791601	0.752829	0.45829	0.630317	0.794135	0.617618	0.74972	0.476206	0.771208	0.69514	0.56662	0.573132	0.375144	0.579538
TCGA_TCGA-CV-7100	0.250826	0.642496	0.725053	0.636373	0.786652	0.707821	0.318473	0.6633	0.45751	0.822671	0.772963	0.407049	0.499998	0.773535	0.579342	0.743795	0.172744	0.724419	0.668233	0.529837	0.579276	0.446791	0.58588
TCGA_TCGA-F7-A61S	0.284227	0.638375	0.799634	0.666373	0.783799	0.75762	0.32276	0.703892	0.421085	0.775305	0.792971	0.411076	0.493808	0.777255	0.610788	0.649696	0.516778	0.757283	0.60658	0.566336	0.576821	0.453688	0.575013
TCGA_TCGA-MT-A67D	0.423916	0.65326	0.63909	0.639038	0.740487	0.777427	0.45172	0.675498	0.437128	0.757693	0.747986	0.427225	0.624386	0.790763	0.566474	0.703245	0.587523	0.783172	0.600168	0.61199	0.58194	0.474818	0.526852
TCGA_TCGA-CN-5364	0.0944228	0.616118	0.662693	0.644758	0.717937	0.747979	0.302837	0.666288	0.410812	0.787604	0.72427	0.442541	0.500703	0.792463	0.58115	0.744481	0.463765	0.744137	0.614814	0.560447	0.538351	0.457865	0.591363
TCGA_TCGA-CQ-5331	0.372266	0.656021	0.797684	0.706247	0.746281	0.720681	0.383984	0.725298	0.544788	0.772078	0.860203	0.472941	0.555682	0.81505	0.567756	0.733481	0.580197	0.772665	0.68512	0.639645	0.610927	0.4524	0.603686
TCGA_TCGA-CN-6018	0.247684	0.70608	0.713295	0.671541	0.747169	0.753853	0.431242	0.711769	0.492316	0.796639	0.852124	0.511549	0.588102	0.80678	0.659936	0.738015	0.420624	0.758446	0.759314	0.602605	0.6125	0.37218	0.619811
TCGA_TCGA-CV-A45U	0.141147	0.635233	0.691746	0.634982	0.757025	0.746404	0.346433	0.631806	0.282714	0.778487	0.641398	0.39399	0.519906	0.774808	0.517833	0.68394	0.342135	0.718057	0.47992	0.550423	0.524045	0.406656	0.567636
TCGA_TCGA-MZ-A7D7	0.110756	0.592065	0.556242	0.64752	0.707875	0.761309	0.325158	0.616828	0.234547	0.778521	0.518061	0.397503	0.5109	0.751803	0.539666	0.592485	0.485217	0.723786	0.452768	0.535347	0.502216	0.436265	0.567109
TCGA_TCGA-UF-A718	0.256716	0.593331	0.690976	0.693709	0.743066	0.792561	0.269623	0.692891	0.373821	0.753697	0.706726	0.378615	0.571315	0.825558	0.585727	0.725896	0.462344	0.758452	0.592808	0.56446	0.564551	0.408755	0.559213
TCGA_TCGA-CV-6956	0.0324771	0.52019	0.462923	0.579983	0.7186	0.837008	0.29148	0.623027	0.210211	0.755809	0.523981	0.300964	0.380472	0.80375	0.540901	0.679722	0.36791	0.752844	0.409283	0.509785	0.484641	0.377204	0.578973
TCGA_TCGA-CN-A499	0.271151	0.730271	0.785425	0.653071	0.772922	0.780667	0.331267	0.674624	0.486173	0.800516	0.806808	0.433258	0.543846	0.767878	0.562681	0.671787	0.43504	0.764829	0.66253	0.557888	0.59313	0.445552	0.630212
TCGA_TCGA-BB-8601	0.0847381	0.573703	0.496745	0.536889	0.711086	0.736699	0.272655	0.629222	0.215865	0.768132	0.529026	0.360999	0.565453	0.766054	0.498969	0.534884	0.267988	0.712822	0.383452	0.543029	0.488767	0.431152	0.600742
TCGA_TCGA-D6-A6EQ	0.30662	0.538889	0.738563	0.690913	0.733274	0.797574	0.40804	0.696117	0.408515	0.752451	0.809954	0.495114	0.623038	0.80016	0.576875	0.695735	0.484223	0.753593	0.65471	0.575308	0.578761	0.422155	0.530435
TCGA_TCGA-CN-6998	0.144583	0.52495	0.61087	0.660335	0.739297	0.781201	0.365881	0.658729	0.34584	0.785564	0.667816	0.394098	0.509607	0.805716	0.57852	0.648874	0.57699	0.764394	0.592833	0.568045	0.535357	0.435445	0.568378
TCGA_TCGA-BA-A6D8	0.214752	0.505018	0.610143	0.618502	0.769124	0.768729	0.376679	0.63945	0.258185	0.764928	0.690532	0.542835	0.597909	0.827684	0.518585	0.696452	0.221632	0.724739	0.530743	0.562433	0.522155	0.39507	0.4691
TCGA_TCGA-F7-A50J	0.195252	0.613461	0.711773	0.71709	0.728178	0.793583	0.424429	0.675872	0.374612	0.753729	0.707678	0.407185	0.564724	0.782308	0.56456	0.686163	0.525054	0.788861	0.556995	0.549161	0.55802	0.430349	0.556526
TCGA_TCGA-IQ-A61I	0.324154	0.732633	0.764547	0.638543	0.749227	0.809966	0.231728	0.64436	0.444243	0.811267	0.782396	0.450111	0.528943	0.772397	0.583017	0.665136	0.445993	0.740282	0.67509	0.506818	0.581225	0.484056	0.565731
TCGA_TCGA-CV-7104	0.224093	0.597475	0.612675	0.66869	0.736342	0.74569	0.437906	0.696159	0.468196	0.787876	0.804177	0.485847	0.60619	0.80136	0.627486	0.774976	0.539438	0.782143	0.694507	0.6162	0.604927	0.438966	0.559153
TCGA_TCGA-BA-A6DI	0.161768	0.533146	0.565359	0.619145	0.753517	0.791979	0.307564	0.608714	0.323835	0.806152	0.58571	0.371248	0.623431	0.765004	0.543419	0.666843	0.472391	0.77403	0.471764	0.501923	0.51259	0.437339	0.574582
TCGA_TCGA-CV-5442	0.111615	0.505241	0.544316	0.624518	0.640099	0.750633	0.329157	0.60984	0.276061	0.797701	0.588059	0.363764	0.441275	0.819401	0.475361	0.557002	0.428538	0.743001	0.446694	0.511189	0.471028	0.4136	0.534934
TCGA_TCGA-D6-6823	0.195338	0.581963	0.532912	0.618097	0.739597	0.816926	0.234553	0.649824	0.330894	0.759551	0.630269	0.41067	0.574363	0.781437	0.519669	0.669467	0.43991	0.766931	0.540205	0.52578	0.490472	0.398281	0.601587
TCGA_TCGA-F7-A61V	0.238323	0.534527	0.589196	0.656864	0.707858	0.778155	0.330656	0.631097	0.276726	0.733144	0.635024	0.357048	0.508298	0.76127	0.468297	0.634216	0.336775	0.767858	0.455547	0.53363	0.505001	0.36608	0.572233
TCGA_TCGA-CN-4733	0.583501	0.74384	0.881165	0.713429	0.751719	0.728967	0.493192	0.731595	0.693589	0.785101	0.948628	0.516309	0.788183	0.850633	0.663062	0.793386	0.394513	0.772475	0.819392	0.660815	0.708715	0.410988	0.612071
TCGA_TCGA-CR-7379	0.202949	0.611049	0.531912	0.654195	0.733651	0.812757	0.422169	0.722597	0.386537	0.786485	0.744839	0.4923	0.67237	0.804722	0.574534	0.712265	0.574447	0.781172	0.66823	0.616271	0.552427	0.380627	0.568955
TCGA_TCGA-CV-7245	0.101601	0.598393	0.580634	0.666198	0.718851	0.753722	0.37021	0.662618	0.260398	0.718037	0.58815	0.364142	0.575568	0.775742	0.547516	0.670599	0.422294	0.763783	0.551574	0.532042	0.51077	0.453951	0.580326
TCGA_TCGA-CV-7254	0.542686	0.703058	0.800626	0.662585	0.768993	0.699194	0.408727	0.703416	0.604372	0.791967	0.887843	0.614827	0.726066	0.811102	0.591583	0.724644	0.226899	0.767182	0.726363	0.64334	0.650328	0.399231	0.556391
TCGA_TCGA-UF-A7JJ	0.390893	0.626725	0.800181	0.690562	0.753173	0.750646	0.339488	0.718293	0.543827	0.78393	0.896638	0.560286	0.608023	0.807269	0.607381	0.761364	0.515806	0.81505	0.743566	0.64355	0.600381	0.405136	0.505586
TCGA_TCGA-CN-5358	0.49816	0.689133	0.816976	0.711817	0.732273	0.751465	0.470703	0.74778	0.624869	0.801434	0.946115	0.571681	0.80111	0.839028	0.664468	0.801889	0.560352	0.818662	0.820718	0.68917	0.680367	0.412821	0.602533
TCGA_TCGA-CV-5436	0.190357	0.608779	0.630117	0.665226	0.748784	0.750983	0.384465	0.6563	0.295959	0.732047	0.652382	0.366423	0.554841	0.808574	0.537748	0.63509	0.398557	0.735945	0.600445	0.519866	0.514089	0.371598	0.620048
TCGA_TCGA-BB-4217	0.814494	0.774891	0.830625	0.674411	0.727706	0.736183	0.39785	0.66883	0.737301	0.766	0.856613	0.410055	0.533758	0.827003	0.575809	0.722638	0.3644	0.763461	0.605118	0.607814	0.64144	0.421774	0.55492
TCGA_TCGA-CN-4731	0.12062	0.543547	0.619339	0.673638	0.743379	0.773248	0.248186	0.636904	0.398588	0.76492	0.671218	0.424886	0.562523	0.798296	0.558381	0.731469	0.459073	0.748797	0.492945	0.559992	0.546423	0.423472	0.55635
TCGA_TCGA-CV-7178	0.179572	0.652761	0.750259	0.6733	0.729407	0.714289	0.379757	0.676945	0.438731	0.756038	0.827888	0.458059	0.575915	0.777892	0.602215	0.743816	0.290789	0.727394	0.661726	0.604223	0.593817	0.340425	0.586797
TCGA_TCGA-F7-A623	0.233337	0.662467	0.626976	0.634515	0.694669	0.705689	0.314941	0.669698	0.337817	0.751396	0.681355	0.400382	0.456232	0.763894	0.499467	0.610573	0.516689	0.757616	0.558998	0.54308	0.505852	0.476454	0.528074
TCGA_TCGA-CQ-5332	0.135862	0.608681	0.5459	0.618752	0.695952	0.733561	0.300644	0.661075	0.33132	0.761998	0.708453	0.407673	0.565746	0.77255	0.570202	0.673191	0.31757	0.723487	0.571292	0.583827	0.528963	0.351265	0.550763
TCGA_TCGA-CQ-7069	0.214873	0.519772	0.475022	0.645431	0.735676	0.751426	0.407592	0.65629	0.33219	0.732056	0.604552	0.388784	0.537126	0.79716	0.55734	0.697555	0.53653	0.819083	0.580353	0.568557	0.53155	0.46363	0.55844
TCGA_TCGA-D6-6825	0.292224	0.675084	0.770563	0.667284	0.732919	0.744822	0.38311	0.743961	0.534257	0.78459	0.886354	0.461642	0.64003	0.783917	0.597491	0.749361	0.566729	0.789638	0.724913	0.647022	0.606091	0.466911	0.588286
TCGA_TCGA-P3-A6SX	0.0460778	0.535497	0.525455	0.564846	0.74603	0.781067	0.294302	0.641892	0.223	0.733365	0.603264	0.343691	0.422382	0.784581	0.523141	0.683724	0.367885	0.751111	0.413354	0.552342	0.468428	0.374779	0.529018
TCGA_TCGA-CV-7432	0.137678	0.601028	0.523841	0.624735	0.735548	0.76362	0.306042	0.686194	0.275417	0.753662	0.684069	0.399229	0.518274	0.806645	0.594972	0.675859	0.445262	0.71077	0.606044	0.513874	0.4982	0.387335	0.591695
TCGA_TCGA-KU-A6H8	0.217252	0.516273	0.742871	0.631335	0.714134	0.72718	0.357206	0.696048	0.340024	0.795929	0.698064	0.373847	0.584784	0.774854	0.491697	0.725654	0.292121	0.767386	0.495538	0.570512	0.546913	0.428474	0.510415
TCGA_TCGA-CQ-5326	0.0680399	0.678822	0.555608	0.735208	0.766877	0.744346	0.302169	0.744762	0.474731	0.80148	0.794172	0.491953	0.641676	0.786254	0.606085	0.758548	0.562149	0.784344	0.726506	0.587218	0.568717	0.474271	0.601866
TCGA_TCGA-CN-A6V6	0.375601	0.729124	0.847074	0.666922	0.739157	0.710757	0.381981	0.643687	0.517129	0.782319	0.83785	0.438622	0.597347	0.808435	0.569766	0.748894	0.420751	0.756477	0.612588	0.569501	0.589102	0.439167	0.588572
TCGA_TCGA-DQ-5625	0.261845	0.567082	0.82638	0.707984	0.745653	0.723868	0.372511	0.681571	0.511595	0.767276	0.822996	0.462131	0.535836	0.824886	0.604715	0.76554	0.490971	0.738515	0.672898	0.607513	0.622675	0.455472	0.598657
TCGA_TCGA-CV-5977	0.152814	0.576399	0.571092	0.657202	0.749409	0.73549	0.296098	0.668137	0.299891	0.714994	0.653301	0.430445	0.480612	0.769573	0.555898	0.689356	0.508795	0.743074	0.520795	0.536084	0.533758	0.381641	0.576567
TCGA_TCGA-UF-A7JD	0.13376	0.659301	0.537485	0.662005	0.690202	0.730145	0.431938	0.678238	0.316875	0.745792	0.694844	0.438543	0.637206	0.78765	0.6075	0.764324	0.3044	0.749685	0.668245	0.550592	0.546058	0.311058	0.511427
TCGA_TCGA-CR-7385	0.411872	0.830736	0.800303	0.721483	0.716652	0.702421	0.398415	0.66732	0.52936	0.81507	0.846695	0.534501	0.511898	0.823692	0.57457	0.713511	0.448091	0.747804	0.64386	0.579809	0.585578	0.489298	0.621081
TCGA_TCGA-CQ-7071	0.196024	0.621245	0.695129	0.651777	0.725755	0.721557	0.393557	0.689942	0.44541	0.800875	0.753364	0.417938	0.560046	0.782719	0.565395	0.709436	0.563154	0.76929	0.633638	0.593301	0.572646	0.3956	0.623927
TCGA_TCGA-T2-A6X0	0.28906	0.744711	0.727145	0.669537	0.75149	0.700719	0.351941	0.631356	0.439954	0.779956	0.738902	0.474421	0.509887	0.756979	0.538048	0.666535	0.152029	0.736178	0.548327	0.563654	0.536185	0.387975	0.57787
TCGA_TCGA-CR-7367	0.318222	0.622437	0.624677	0.662901	0.718118	0.749883	0.305255	0.697186	0.431797	0.755663	0.782982	0.44716	0.536721	0.813594	0.552819	0.710605	0.511513	0.789642	0.689458	0.640192	0.576005	0.366008	0.551938
TCGA_TCGA-CV-A465	0.14267	0.51129	0.531789	0.6471	0.725465	0.772744	0.2893	0.613325	0.254115	0.74226	0.568458	0.339816	0.544305	0.771292	0.503173	0.604902	0.546867	0.772629	0.479546	0.549828	0.485315	0.421442	0.543427
TCGA_TCGA-BA-5557	0.207861	0.716326	0.693531	0.792522	0.73208	0.767924	0.505902	0.736365	0.530631	0.839468	0.922587	0.628804	0.794107	0.81094	0.632034	0.74917	0.723706	0.875638	0.817552	0.708524	0.642041	0.482155	0.566813
TCGA_TCGA-CN-6016	0.195138	0.369192	0.676308	0.676841	0.734847	0.758594	0.320363	0.665928	0.429441	0.769739	0.806147	0.491489	0.535236	0.829614	0.615348	0.781875	0.32286	0.765382	0.693567	0.644448	0.62366	0.436071	0.471362
TCGA_TCGA-F7-7848	0.339083	0.676933	0.693803	0.643144	0.666949	0.740843	0.338384	0.675492	0.464669	0.79714	0.729468	0.433581	0.589891	0.792689	0.532139	0.696897	0.472606	0.751152	0.578272	0.587758	0.569598	0.445137	0.566527
TCGA_TCGA-CN-6017	0.546207	0.671269	0.880196	0.710997	0.742693	0.748468	0.530131	0.715469	0.635989	0.824405	0.950107	0.500388	0.733393	0.828083	0.642682	0.811369	0.366239	0.777431	0.778406	0.660851	0.69206	0.447944	0.567885
TCGA_TCGA-QK-A8Z8	0.177278	0.542695	0.608023	0.647118	0.736206	0.7385	0.246134	0.603684	0.399193	0.74894	0.564257	0.439414	0.519961	0.757552	0.506224	0.617698	0.370143	0.772697	0.44329	0.487077	0.480533	0.337574	0.490798
TCGA_TCGA-MT-A51W	0.147075	0.578513	0.674841	0.641368	0.754694	0.744192	0.3764	0.645998	0.387343	0.77213	0.668118	0.38724	0.558494	0.786879	0.543201	0.654816	0.52124	0.764126	0.547203	0.553551	0.54013	0.454388	0.596806
TCGA_TCGA-CV-6940	0.114821	0.538339	0.592826	0.657471	0.714705	0.740296	0.303469	0.625934	0.288095	0.771155	0.635992	0.420126	0.437596	0.775145	0.540232	0.663184	0.36375	0.741204	0.576095	0.547574	0.502895	0.382386	0.555482
TCGA_TCGA-CV-7440	0.106448	0.674378	0.526294	0.667624	0.726957	0.740738	0.375624	0.664468	0.363349	0.789868	0.686675	0.412672	0.538216	0.77449	0.584996	0.702113	0.312398	0.74993	0.586849	0.496271	0.541564	0.399834	0.542836
TCGA_TCGA-UF-A7JS	0.281005	0.599215	0.752796	0.692114	0.761477	0.790631	0.405001	0.673487	0.400883	0.750292	0.839579	0.625545	0.610604	0.826284	0.597787	0.719207	0.619871	0.710978	0.630585	0.589642	0.578976	0.419746	0.485251
TCGA_TCGA-CV-A45R	0.176043	0.52451	0.637998	0.619056	0.719046	0.795695	0.313383	0.662777	0.359736	0.788533	0.73353	0.4964	0.602896	0.799184	0.553725	0.76687	0.481732	0.76818	0.6594	0.613096	0.567912	0.467144	0.534792
TCGA_TCGA-MT-A67A	0.192473	0.506397	0.760521	0.612787	0.701163	0.760799	0.305874	0.653168	0.313986	0.757894	0.666244	0.406415	0.550669	0.7982	0.507581	0.619959	0.537402	0.754281	0.430127	0.554577	0.515901	0.400871	0.559408
TCGA_TCGA-CV-7414	0.0698667	0.492499	0.65214	0.610314	0.757948	0.735367	0.257011	0.632316	0.302331	0.802387	0.61729	0.408626	0.496862	0.802213	0.513811	0.681007	0.268181	0.701038	0.432248	0.511688	0.545996	0.398458	0.544768
TCGA_TCGA-CR-7374	0.353595	0.678136	0.618318	0.609615	0.740446	0.746553	0.35103	0.649019	0.403851	0.746319	0.645377	0.437679	0.546251	0.799041	0.486643	0.664385	0.319958	0.742253	0.534457	0.551993	0.516357	0.358639	0.596331
TCGA_TCGA-CV-6941	0.220059	0.598105	0.576126	0.617073	0.730497	0.73734	0.326125	0.678879	0.402263	0.748527	0.713239	0.445952	0.556235	0.793251	0.546942	0.710787	0.358497	0.774696	0.5937	0.581382	0.530216	0.341568	0.521368
TCGA_TCGA-CN-6013	0.289843	0.651589	0.833128	0.705108	0.734259	0.766291	0.464224	0.737221	0.558824	0.79829	0.950696	0.563273	0.595987	0.833473	0.623132	0.743111	0.373866	0.761714	0.76455	0.654914	0.638349	0.487745	0.551208
TCGA_TCGA-QK-A6VC	0.310727	0.759157	0.795295	0.696086	0.743024	0.763745	0.360696	0.658178	0.478995	0.792551	0.823836	0.478463	0.620821	0.770337	0.53162	0.713588	0.43608	0.757542	0.552982	0.573362	0.596185	0.455856	0.546863
TCGA_TCGA-QK-A8Z9	0.132973	0.525318	0.656284	0.639263	0.731442	0.764781	0.371836	0.653019	0.441685	0.745982	0.802962	0.473403	0.460578	0.779625	0.559554	0.725155	0.306323	0.766318	0.665434	0.613821	0.578838	0.328101	0.519504
TCGA_TCGA-QK-A6VB	0.125278	0.491677	0.508477	0.596163	0.713842	0.763645	0.296101	0.650729	0.219883	0.76341	0.550358	0.389809	0.491906	0.783298	0.504962	0.67262	0.326886	0.739102	0.452573	0.523739	0.449516	0.308975	0.52239
TCGA_TCGA-D6-6827	0.218871	0.600511	0.531468	0.610271	0.703684	0.673034	0.28952	0.653464	0.34576	0.730028	0.670324	0.414514	0.505578	0.75581	0.533621	0.668779	0.206906	0.755801	0.45779	0.558443	0.516242	0.306539	0.583181
TCGA_TCGA-CR-7382	0.359115	0.694578	0.723578	0.657236	0.762901	0.744047	0.507331	0.725895	0.588817	0.807529	0.898488	0.54657	0.744261	0.829843	0.610553	0.815336	0.438808	0.78493	0.796184	0.644363	0.669414	0.404496	0.620218
TCGA_TCGA-P3-A5QA	0.172978	0.584309	0.571835	0.632758	0.72047	0.743815	0.360536	0.602377	0.290967	0.739437	0.562948	0.350244	0.52758	0.796054	0.577541	0.770882	0.338666	0.757323	0.582665	0.53614	0.521483	0.369149	0.570246
TCGA_TCGA-CV-5979	0.134355	0.573008	0.528116	0.638165	0.739822	0.790727	0.283688	0.677536	0.347163	0.750939	0.631723	0.420278	0.474472	0.801697	0.575768	0.72878	0.317286	0.749068	0.584751	0.539218	0.495286	0.337335	0.597703
TCGA_TCGA-CV-A6JE	0.209995	0.550277	0.845287	0.667276	0.776257	0.805597	0.421942	0.682088	0.394874	0.741052	0.79338	0.493424	0.470743	0.829746	0.584224	0.71012	0.425096	0.74947	0.587914	0.584617	0.560277	0.409978	0.483928
TCGA_TCGA-CN-6996	0.32293	0.682694	0.740793	0.670465	0.764643	0.71918	0.395803	0.731298	0.534685	0.790563	0.875105	0.490627	0.701674	0.791463	0.61339	0.770942	0.473545	0.782172	0.760686	0.648064	0.618942	0.436146	0.601155
TCGA_TCGA-4P-AA8J	0.302407	0.577868	0.708835	0.682355	0.743018	0.775586	0.259468	0.669231	0.382847	0.747688	0.808282	0.511171	0.531309	0.80004	0.585364	0.745626	0.372985	0.773727	0.680609	0.566399	0.579599	0.350995	0.514465
TCGA_TCGA-TN-A7HL	0.517744	0.725022	0.955603	0.732649	0.770432	0.820317	0.414113	0.659498	0.565091	0.809064	0.92969	0.569356	0.547966	0.85894	0.653618	0.708646	0.305551	0.742569	0.669971	0.624375	0.666246	0.550903	0.515165
TCGA_TCGA-CN-A63W	0.15368	0.515476	0.65469	0.63835	0.735174	0.782542	0.254044	0.642367	0.251431	0.754463	0.609151	0.365474	0.500387	0.796697	0.557703	0.650562	0.472574	0.753556	0.458795	0.557439	0.50333	0.449072	0.550098
TCGA_TCGA-CN-4730	0.14694	0.564521	0.508493	0.639244	0.734935	0.796491	0.306199	0.634025	0.205663	0.758048	0.589662	0.362318	0.545985	0.800989	0.537474	0.618872	0.351241	0.740613	0.511479	0.496993	0.493505	0.365343	0.563998
TCGA_TCGA-CR-5248	0.590569	0.833664	0.908689	0.709287	0.714463	0.736329	0.309746	0.693838	0.667733	0.767082	0.942318	0.50101	0.579122	0.834572	0.652699	0.719095	0.325047	0.741808	0.717253	0.639543	0.659245	0.455712	0.565254
TCGA_TCGA-CV-6936	0.195755	0.632048	0.697657	0.688952	0.756673	0.782708	0.282185	0.708421	0.361729	0.741646	0.724203	0.446748	0.553264	0.790851	0.538419	0.708717	0.459998	0.705753	0.559909	0.542822	0.542229	0.42948	0.583855
TCGA_TCGA-DQ-5630	0.28007	0.579415	0.803165	0.727012	0.74469	0.74716	0.36334	0.68301	0.474683	0.79667	0.827253	0.541312	0.545367	0.787478	0.62135	0.774241	0.51556	0.778801	0.691873	0.614448	0.615723	0.458414	0.566581
TCGA_TCGA-CR-7393	0.448748	0.670274	0.811252	0.716666	0.717293	0.699399	0.538539	0.695956	0.571728	0.834748	0.869316	0.523491	0.797588	0.832205	0.580325	0.777189	0.445542	0.790646	0.730191	0.670654	0.655813	0.414051	0.596699
TCGA_TCGA-CV-6951	0.15382	0.444774	0.545392	0.6187	0.727349	0.736683	0.296104	0.650083	0.269898	0.767215	0.57057	0.390432	0.474514	0.783253	0.523273	0.68068	0.382972	0.726063	0.46049	0.498324	0.496984	0.362989	0.485079
TCGA_TCGA-CV-7103	0.177557	0.476211	0.513389	0.601881	0.710127	0.714091	0.305281	0.651617	0.295474	0.765553	0.652846	0.437387	0.524588	0.822462	0.567692	0.712285	0.0849243	0.741501	0.586888	0.600645	0.529223	0.398984	0.519061
TCGA_TCGA-D6-A6ES	0.155252	0.547099	0.596682	0.73156	0.710386	0.781601	0.421907	0.721008	0.281394	0.756696	0.771464	0.4975	0.632662	0.830929	0.573383	0.609541	0.633922	0.751469	0.614198	0.571019	0.558402	0.459236	0.499764
TCGA_TCGA-CQ-A4CG	0.13263	0.610252	0.524619	0.665026	0.733444	0.777947	0.366871	0.614982	0.263407	0.781283	0.621997	0.433205	0.507974	0.762549	0.577369	0.706471	0.244742	0.774976	0.527488	0.478042	0.505203	0.363669	0.59765
TCGA_TCGA-CQ-6220	0.157098	0.583558	0.663387	0.688641	0.74153	0.72308	0.354627	0.689442	0.416564	0.753932	0.713259	0.394293	0.541054	0.789969	0.54882	0.648214	0.565856	0.787922	0.599809	0.575015	0.537332	0.437022	0.561257
TCGA_TCGA-BA-4078	0.168099	0.643063	0.565744	0.667094	0.740625	0.707433	0.31072	0.651015	0.384506	0.739045	0.716324	0.461165	0.523791	0.76296	0.530343	0.70486	0.107933	0.772092	0.608237	0.581354	0.544108	0.370977	0.563578
TCGA_TCGA-CV-5973	0.101286	0.500378	0.520038	0.640419	0.739162	0.769082	0.357003	0.680134	0.265954	0.768705	0.66905	0.445297	0.58676	0.81846	0.562062	0.68051	0.571111	0.786831	0.539651	0.558322	0.495353	0.450351	0.453161
TCGA_TCGA-CV-5440	0.0871799	0.410148	0.508756	0.634217	0.725012	0.778925	0.270425	0.644202	0.283346	0.777813	0.582401	0.437052	0.419517	0.786696	0.565432	0.67864	0.335146	0.729486	0.461086	0.513285	0.500214	0.383913	0.495166
TCGA_TCGA-CR-7365	0.114709	0.539328	0.550148	0.616315	0.728284	0.745446	0.307504	0.662109	0.34319	0.766672	0.690833	0.415294	0.592617	0.790217	0.573226	0.704833	0.535687	0.78447	0.554274	0.582128	0.524985	0.413461	0.558491
TCGA_TCGA-IQ-A61J	0.154817	0.478894	0.655801	0.674876	0.744008	0.799992	0.321595	0.658358	0.40936	0.772012	0.751401	0.429235	0.658289	0.790333	0.580949	0.761725	0.454004	0.792501	0.668005	0.624717	0.564276	0.375912	0.556224
TCGA_TCGA-BB-4224	0.158692	0.600766	0.537215	0.652482	0.702313	0.714357	0.339934	0.662638	0.272446	0.779459	0.612895	0.380623	0.422177	0.751141	0.488759	0.583233	0.420545	0.720775	0.519753	0.597019	0.476751	0.370867	0.616843
TCGA_TCGA-TN-A7HJ	0.272255	0.568847	0.558375	0.620811	0.719275	0.771952	0.269917	0.626409	0.318481	0.784241	0.633864	0.383089	0.461997	0.781162	0.524124	0.656657	0.44194	0.774026	0.437541	0.530122	0.516921	0.439124	0.546725
TCGA_TCGA-BB-4228	0.201564	0.755525	0.656595	0.686018	0.728306	0.780171	0.359794	0.607657	0.394485	0.77706	0.758523	0.392624	0.664705	0.801101	0.595638	0.67514	0.201137	0.685718	0.609521	0.555929	0.577239	0.442167	0.559745
TCGA_TCGA-BB-A5HU	0.124	0.625223	0.531596	0.732419	0.724852	0.753311	0.34946	0.681851	0.342032	0.744144	0.690925	0.424149	0.475244	0.796468	0.604792	0.702026	0.471487	0.78021	0.597136	0.553894	0.548372	0.384525	0.515131
TCGA_TCGA-BA-A6DA	0.172942	0.584699	0.663819	0.711419	0.740892	0.790425	0.368656	0.665866	0.341912	0.771522	0.722271	0.4538	0.5911	0.792122	0.532144	0.643166	0.637749	0.78518	0.579669	0.588204	0.523075	0.456903	0.472377
TCGA_TCGA-IQ-7631	0.0752345	0.372741	0.49986	0.574088	0.724685	0.764336	0.251169	0.651186	0.181334	0.752176	0.612105	0.404963	0.449031	0.821559	0.469036	0.724222	0.234501	0.806477	0.429883	0.509293	0.510862	0.413896	0.455224
TCGA_TCGA-BB-A6UO	0.0363519	0.606024	0.633121	0.648976	0.749887	0.759561	0.384283	0.692444	0.34062	0.737629	0.699119	0.427022	0.454277	0.786634	0.58797	0.692937	0.443129	0.754162	0.597474	0.570116	0.544082	0.399545	0.53394
TCGA_TCGA-CR-6488	0.186123	0.539206	0.644544	0.694788	0.726723	0.749427	0.395978	0.694907	0.446325	0.804899	0.826023	0.546932	0.657577	0.814413	0.595358	0.759661	0.498767	0.78753	0.729416	0.653501	0.581772	0.401287	0.534355
TCGA_TCGA-T3-A92M	0.301929	0.646304	0.735896	0.669381	0.718553	0.73617	0.310037	0.6884	0.447014	0.757594	0.790222	0.479709	0.466843	0.797028	0.583832	0.718256	0.30385	0.762523	0.65278	0.564563	0.569514	0.390033	0.551853
TCGA_TCGA-H7-7774	0.249332	0.607575	0.685064	0.67068	0.698243	0.775057	0.367107	0.692355	0.42829	0.758725	0.711618	0.438913	0.55216	0.778224	0.516336	0.597521	0.538322	0.753613	0.543528	0.633977	0.534217	0.407817	0.575892
TCGA_TCGA-CQ-6227	0.230324	0.562084	0.587161	0.63289	0.746112	0.74131	0.37233	0.683657	0.354139	0.784974	0.682281	0.409011	0.616553	0.787287	0.598443	0.758139	0.486694	0.782112	0.593728	0.592569	0.56811	0.393951	0.570796
TCGA_TCGA-D6-A4ZB	0.256452	0.559767	0.585895	0.661939	0.739336	0.809247	0.299057	0.680598	0.31568	0.766518	0.682271	0.407642	0.483797	0.765029	0.574341	0.657008	0.600915	0.78608	0.535477	0.539485	0.543402	0.422664	0.495015
TCGA_TCGA-P3-A5QF	0.139344	0.645877	0.645468	0.618926	0.715912	0.743452	0.344909	0.657764	0.340409	0.796382	0.677607	0.448317	0.548049	0.777643	0.515581	0.65218	0.451861	0.715242	0.500886	0.547866	0.519978	0.404459	0.609545
TCGA_TCGA-D6-6516	0.229989	0.570061	0.769667	0.701999	0.735049	0.750589	0.356192	0.689824	0.414683	0.782625	0.766881	0.464678	0.638282	0.814691	0.515378	0.675973	0.486277	0.726833	0.607456	0.585999	0.565999	0.434633	0.609963
TCGA_TCGA-CN-5356	0.224529	0.576212	0.580116	0.653043	0.698075	0.764152	0.270917	0.640357	0.349497	0.759199	0.685418	0.364875	0.511337	0.787777	0.526257	0.706609	0.297044	0.748959	0.531746	0.604194	0.541885	0.418041	0.547252
TCGA_TCGA-QK-A6IH	0.133563	0.471773	0.602911	0.638621	0.719062	0.784732	0.340637	0.690363	0.300873	0.734656	0.68139	0.442191	0.494807	0.819028	0.566262	0.652805	0.42114	0.72616	0.559802	0.531764	0.519207	0.392352	0.503833
TCGA_TCGA-CV-7099	0.177061	0.673741	0.728747	0.652802	0.739126	0.76905	0.407015	0.673165	0.450636	0.783257	0.802928	0.479111	0.610067	0.802608	0.576559	0.685658	0.524724	0.752536	0.643904	0.559458	0.586289	0.427451	0.642173
TCGA_TCGA-CV-7434	0.108365	0.618407	0.618535	0.618143	0.749995	0.733112	0.38611	0.651559	0.369994	0.780523	0.741956	0.444462	0.460235	0.786459	0.589479	0.673273	0.430448	0.716189	0.601595	0.538862	0.545919	0.377717	0.60108
TCGA_TCGA-CR-5249	0.664168	0.769549	0.807999	0.72245	0.716371	0.764266	0.359045	0.654655	0.645478	0.807717	0.804854	0.45845	0.560884	0.84838	0.558191	0.741927	0.294977	0.760238	0.62296	0.601065	0.628292	0.450641	0.59331
TCGA_TCGA-C9-A480	0.150588	0.51079	0.643216	0.664364	0.724266	0.776838	0.330597	0.619426	0.340264	0.755818	0.644864	0.427513	0.541746	0.792502	0.537592	0.663322	0.488054	0.762476	0.583641	0.558488	0.543935	0.400737	0.553413
TCGA_TCGA-CQ-7063	0.330376	0.62992	0.78934	0.666532	0.760015	0.757702	0.439762	0.706451	0.528682	0.776118	0.85093	0.470756	0.648256	0.820853	0.570021	0.761063	0.528029	0.78074	0.681387	0.656159	0.620275	0.445654	0.615138
TCGA_TCGA-CR-6472	0.250495	0.647965	0.663384	0.554633	0.715644	0.711731	0.308606	0.651709	0.343666	0.774877	0.604903	0.364587	0.538495	0.834297	0.451361	0.682889	0.235654	0.684299	0.406993	0.521278	0.511549	0.424608	0.568025
TCGA_TCGA-CV-7090	0.194287	0.585392	0.683528	0.664501	0.764026	0.756613	0.369877	0.725235	0.528241	0.769329	0.864994	0.520312	0.656568	0.80916	0.617062	0.72369	0.434472	0.786859	0.739295	0.621727	0.573884	0.391128	0.575602
TCGA_TCGA-CN-A641	0.180317	0.580896	0.560661	0.665637	0.706112	0.757478	0.327469	0.632997	0.311734	0.745987	0.611052	0.377854	0.542759	0.753001	0.499594	0.637039	0.515983	0.772339	0.433052	0.583061	0.487537	0.412535	0.563406
TCGA_TCGA-QK-A6IF	0.765369	0.817336	0.852454	0.659846	0.730796	0.681292	0.450716	0.602494	0.726622	0.750154	0.842056	0.462851	0.565834	0.790917	0.563825	0.703378	0.184544	0.766653	0.60152	0.575656	0.660802	0.392158	0.606199
TCGA_TCGA-CV-6961	0.0505422	0.632057	0.545799	0.666564	0.735755	0.740103	0.384704	0.685633	0.339769	0.750726	0.72816	0.41041	0.639278	0.773868	0.59789	0.772736	0.488382	0.778424	0.602494	0.584989	0.589175	0.401271	0.659703
TCGA_TCGA-CN-4741	0.108229	0.600675	0.584295	0.668791	0.717787	0.72816	0.361415	0.650286	0.299148	0.788027	0.666658	0.46378	0.518573	0.771596	0.528937	0.694641	0.460074	0.74647	0.476307	0.550774	0.518845	0.45611	0.588532
TCGA_TCGA-T2-A6WZ	0.405371	0.544309	0.695277	0.624515	0.759769	0.795881	0.44894	0.635295	0.391605	0.713904	0.710704	0.443456	0.486493	0.792629	0.562503	0.629262	0.429335	0.731111	0.521197	0.530227	0.53803	0.398294	0.518238
TCGA_TCGA-CV-7097	0.197416	0.615537	0.686897	0.66728	0.73069	0.743189	0.371339	0.722707	0.460801	0.80278	0.831143	0.480058	0.623601	0.791965	0.628202	0.743413	0.336464	0.752948	0.687738	0.599692	0.59419	0.38035	0.561035
TCGA_TCGA-HL-7533	0.213835	0.641545	0.78727	0.663946	0.728373	0.751444	0.242108	0.648709	0.415169	0.751146	0.7193	0.416057	0.407889	0.792687	0.573637	0.689138	0.38653	0.719014	0.558377	0.543319	0.584677	0.451213	0.615441
TCGA_TCGA-CV-A464	0.212037	0.578268	0.686535	0.624392	0.754614	0.746812	0.380987	0.657373	0.366469	0.74948	0.697285	0.443595	0.569572	0.798012	0.548291	0.722169	0.440489	0.756149	0.57409	0.572555	0.581789	0.381146	0.582213
TCGA_TCGA-HD-8224	0.113611	0.463862	0.552662	0.622972	0.674264	0.783659	0.299697	0.639753	0.319452	0.806433	0.674062	0.402468	0.460928	0.766962	0.56418	0.735175	0.247115	0.772197	0.575874	0.584942	0.52697	0.422771	0.44331
TCGA_TCGA-P3-A6T4	0.126139	0.555151	0.542171	0.676476	0.745621	0.733556	0.340848	0.691667	0.280696	0.768164	0.605657	0.417517	0.507511	0.755364	0.50159	0.640047	0.610896	0.751782	0.497253	0.548767	0.491679	0.439472	0.492777
TCGA_TCGA-D6-A6EO	0.181111	0.597777	0.537226	0.629581	0.74081	0.753118	0.317741	0.598178	0.296975	0.766183	0.559356	0.386689	0.517797	0.770133	0.538886	0.62839	0.294418	0.741164	0.515272	0.499104	0.483533	0.347734	0.568844
TCGA_TCGA-BB-A6UM	0.224835	0.68991	0.81649	0.671663	0.772733	0.667727	0.328978	0.668146	0.417736	0.769034	0.711001	0.385268	0.44964	0.784963	0.536428	0.650121	0.331752	0.732056	0.514156	0.524663	0.541131	0.458952	0.559086
TCGA_TCGA-BB-A5HY	0.175569	0.65749	0.539462	0.611128	0.770443	0.810284	0.319843	0.647099	0.221803	0.732624	0.60918	0.387268	0.443409	0.800816	0.527473	0.678808	0.295303	0.771916	0.567253	0.493712	0.521712	0.397831	0.534156
TCGA_TCGA-CN-5361	0.153444	0.518975	0.63237	0.630321	0.741237	0.78297	0.221502	0.685836	0.394035	0.769792	0.745857	0.467377	0.463812	0.814453	0.578358	0.760017	0.177955	0.744792	0.590419	0.566973	0.561784	0.423482	0.539298
TCGA_TCGA-CN-4723	0.234605	0.643905	0.63322	0.653244	0.7383	0.80183	0.321317	0.625752	0.423869	0.798484	0.78225	0.469389	0.619042	0.779036	0.588488	0.705256	0.387822	0.79487	0.678211	0.560306	0.545973	0.403594	0.542889
TCGA_TCGA-CN-A6V1	0.956518	0.771106	0.97952	0.730066	0.743664	0.742868	0.341288	0.68498	0.898691	0.783052	0.989298	0.547883	0.579791	0.854539	0.592868	0.694151	0.347357	0.751025	0.732456	0.683547	0.666573	0.452594	0.498523
TCGA_TCGA-CR-7372	0.206198	0.521589	0.565227	0.636667	0.7132	0.750195	0.388038	0.696969	0.34004	0.761536	0.65026	0.410239	0.68261	0.802268	0.540845	0.691869	0.493765	0.771714	0.522386	0.582512	0.533158	0.392875	0.580217
TCGA_TCGA-CQ-5323	0.280351	0.642485	0.63943	0.677738	0.712497	0.747779	0.303719	0.680377	0.395293	0.757394	0.698015	0.407282	0.562531	0.780833	0.535853	0.690214	0.560828	0.749815	0.522526	0.568446	0.559414	0.435081	0.604848
TCGA_TCGA-QK-A6II	0.167312	0.536921	0.70759	0.689321	0.756685	0.753455	0.361203	0.615424	0.344604	0.770442	0.703657	0.45737	0.591655	0.834456	0.560452	0.639357	0.620285	0.755082	0.568942	0.563714	0.545762	0.432555	0.512842
TCGA_TCGA-BA-6870	0.488364	0.633109	0.634949	0.683783	0.744687	0.777179	0.349099	0.688961	0.487224	0.753086	0.751403	0.437516	0.620064	0.77974	0.552562	0.701893	0.510513	0.755558	0.576978	0.559176	0.595545	0.411166	0.5116
TCGA_TCGA-CQ-6222	0.240039	0.5464	0.787114	0.688089	0.761146	0.770535	0.394614	0.73829	0.497186	0.827507	0.909825	0.556267	0.581423	0.81961	0.59154	0.778261	0.517025	0.775657	0.735828	0.670464	0.63369	0.469975	0.52775
TCGA_TCGA-CQ-A4CD	0.225517	0.698789	0.633307	0.717827	0.774978	0.748798	0.36392	0.690022	0.416688	0.791642	0.796673	0.508288	0.502235	0.772672	0.596968	0.704583	0.464056	0.712362	0.647679	0.548241	0.592549	0.429225	0.583192
TCGA_TCGA-F7-A624	0.440635	0.722164	0.93148	0.673416	0.692105	0.692751	0.334697	0.738622	0.606955	0.738459	0.927605	0.598231	0.524214	0.824074	0.610943	0.72325	0.205551	0.739795	0.739402	0.629833	0.654459	0.372233	0.600646
TCGA_TCGA-BA-A4IF	0.198793	0.552995	0.515997	0.6256	0.726748	0.754502	0.263003	0.625625	0.238736	0.766731	0.542962	0.336822	0.382929	0.774793	0.503103	0.621184	0.322328	0.728152	0.446018	0.530729	0.468567	0.361909	0.574132
TCGA_TCGA-CV-A6JD	0.17781	0.561847	0.768081	0.712161	0.780554	0.754581	0.443601	0.678261	0.463428	0.74327	0.837714	0.534932	0.529002	0.820392	0.582464	0.786011	0.227333	0.744182	0.717068	0.560132	0.608907	0.392539	0.543872
TCGA_TCGA-F7-A620	0.377779	0.685965	0.81169	0.663907	0.774874	0.73397	0.394151	0.689776	0.480178	0.773665	0.817749	0.446224	0.565204	0.772246	0.584895	0.680812	0.480175	0.736562	0.629755	0.595851	0.60393	0.452822	0.54146
TCGA_TCGA-BB-4223	0.464285	0.82153	0.784466	0.630396	0.703302	0.751281	0.353879	0.609172	0.51908	0.741654	0.806658	0.397471	0.516393	0.831066	0.593675	0.70443	0.129853	0.73302	0.603655	0.550181	0.618477	0.414248	0.584043
TCGA_TCGA-HD-7831	0.157234	0.485415	0.506708	0.657042	0.720492	0.733983	0.340315	0.723042	0.349418	0.749164	0.750048	0.472646	0.614986	0.807038	0.601776	0.742867	0.286782	0.753268	0.659992	0.562116	0.556533	0.344325	0.521903
TCGA_TCGA-CV-A6JO	0.255095	0.600505	0.789	0.656829	0.773162	0.75464	0.404162	0.668309	0.484294	0.781456	0.807096	0.443065	0.445681	0.795668	0.583171	0.671212	0.460264	0.740554	0.600578	0.596117	0.593445	0.420983	0.558423
TCGA_TCGA-CR-7376	0.353379	0.688624	0.843456	0.699436	0.731207	0.712893	0.509214	0.758904	0.604891	0.810217	0.982411	0.574101	0.8429	0.826484	0.660555	0.783637	0.4362	0.79313	0.863078	0.696128	0.701008	0.430702	0.623013
TCGA_TCGA-P3-A6T3	0.0746499	0.510368	0.474795	0.658126	0.739838	0.7743	0.35074	0.656575	0.2259	0.760143	0.563397	0.385785	0.490939	0.780622	0.577071	0.689191	0.49793	0.766782	0.517403	0.53712	0.50563	0.40693	0.542006
TCGA_TCGA-CV-7433	0.295042	0.676657	0.830978	0.703636	0.745102	0.75704	0.35904	0.756022	0.509578	0.787758	0.926612	0.560502	0.530917	0.823702	0.642469	0.764421	0.491938	0.764968	0.805774	0.653548	0.66334	0.435201	0.580291
TCGA_TCGA-CV-7263	0.304762	0.570472	0.671099	0.675775	0.710555	0.75145	0.355031	0.672481	0.397569	0.772788	0.782931	0.490212	0.653311	0.806689	0.543499	0.727079	0.243787	0.766713	0.647798	0.615382	0.56509	0.383187	0.508959
TCGA_TCGA-CN-6992	0.133723	0.561093	0.536967	0.616062	0.73115	0.763423	0.209268	0.656415	0.312361	0.731266	0.662713	0.450142	0.48141	0.782772	0.515034	0.668662	0.13596	0.747584	0.557243	0.57614	0.517955	0.367755	0.485911
TCGA_TCGA-CV-7427	0.250839	0.679489	0.794646	0.705389	0.73221	0.719782	0.423861	0.689031	0.527846	0.788489	0.841865	0.495918	0.58317	0.811217	0.571033	0.754043	0.635783	0.767884	0.699757	0.622138	0.598488	0.489427	0.58233
TCGA_TCGA-CN-A6V7	0.102998	0.679362	0.635852	0.638208	0.706972	0.73432	0.338514	0.621747	0.353929	0.711445	0.669288	0.430091	0.425601	0.82421	0.509832	0.625857	0.150174	0.729323	0.49746	0.455599	0.508428	0.464409	0.586428
TCGA_TCGA-CV-6939	0.341721	0.723467	0.714271	0.659437	0.73785	0.692977	0.408666	0.652061	0.454675	0.825616	0.779168	0.442949	0.610605	0.779686	0.600325	0.737432	0.287993	0.790758	0.660585	0.54984	0.633929	0.430038	0.634078
TCGA_TCGA-CV-7422	0.350097	0.696791	0.628104	0.605931	0.737856	0.690374	0.372928	0.669665	0.440279	0.772242	0.723816	0.427965	0.579338	0.794042	0.5696	0.692585	0.307209	0.767471	0.601735	0.576365	0.534583	0.447521	0.62726
TCGA_TCGA-CV-5970	0.195744	0.55559	0.580112	0.687413	0.713303	0.720563	0.368326	0.69109	0.406816	0.754862	0.720724	0.428373	0.549921	0.782486	0.558502	0.731829	0.626086	0.762735	0.633644	0.611134	0.540422	0.476268	0.543074
TCGA_TCGA-CR-7364	0.20931	0.613134	0.554428	0.638101	0.713297	0.747672	0.389492	0.645199	0.387002	0.80203	0.628649	0.474046	0.650698	0.795091	0.52203	0.688012	0.459714	0.797635	0.550045	0.609813	0.558232	0.452962	0.599893
TCGA_TCGA-CV-5431	0.493211	0.760942	0.797144	0.722342	0.736271	0.771436	0.448958	0.628394	0.612942	0.758596	0.897162	0.515507	0.647015	0.811755	0.648093	0.762741	0.291822	0.765586	0.70239	0.624959	0.655434	0.391883	0.598861
TCGA_TCGA-QK-A6IJ	0.280228	0.565186	0.731469	0.696297	0.756175	0.756934	0.310297	0.68285	0.409244	0.796562	0.799543	0.509556	0.540208	0.836084	0.526125	0.696809	0.607844	0.775578	0.635773	0.564045	0.539795	0.462655	0.481546
TCGA_TCGA-QK-AA3K	0.176888	0.66789	0.729413	0.6606	0.702199	0.752701	0.413646	0.709628	0.411134	0.698631	0.823381	0.526621	0.538081	0.804941	0.605595	0.723908	0.140762	0.749106	0.720152	0.556968	0.612464	0.338479	0.584737
TCGA_TCGA-CN-4728	0.221919	0.658476	0.699365	0.730533	0.753801	0.754314	0.408509	0.770512	0.533837	0.789381	0.94501	0.58024	0.73393	0.803057	0.659764	0.774257	0.299163	0.783141	0.818053	0.712511	0.644085	0.445241	0.538455
TCGA_TCGA-UF-A7JV	0.169678	0.668209	0.668718	0.717051	0.772253	0.758562	0.372559	0.713998	0.47713	0.780209	0.86237	0.55383	0.592369	0.817262	0.641762	0.757149	0.369135	0.811434	0.786281	0.605931	0.607491	0.431374	0.568606
TCGA_TCGA-UP-A6WW	0.270341	0.63885	0.684619	0.682592	0.7305	0.76223	0.244109	0.675163	0.395197	0.782126	0.812381	0.496677	0.500236	0.789507	0.565967	0.688146	0.325707	0.747018	0.643217	0.568685	0.600012	0.506308	0.48591
TCGA_TCGA-CQ-A4CI	0.103401	0.661446	0.512208	0.570245	0.719143	0.751196	0.272174	0.591778	0.18417	0.759367	0.559544	0.417487	0.483813	0.780441	0.544384	0.629543	0.193413	0.700479	0.457596	0.479846	0.476041	0.325093	0.578076
TCGA_TCGA-C9-A47Z	0.129801	0.520991	0.586245	0.617819	0.753143	0.781433	0.262961	0.669147	0.318734	0.753213	0.623941	0.395146	0.472644	0.78882	0.546992	0.631097	0.564156	0.797012	0.514633	0.554941	0.515771	0.400162	0.551229
TCGA_TCGA-CV-6960	0.0669147	0.51992	0.502618	0.654489	0.743029	0.765278	0.201999	0.606443	0.291723	0.753403	0.582717	0.371929	0.517379	0.774364	0.578048	0.66264	0.410946	0.743791	0.465252	0.514994	0.51159	0.423841	0.563407
TCGA_TCGA-D6-8569	0.21137	0.597715	0.58739	0.673042	0.751919	0.769523	0.298498	0.661139	0.392638	0.748575	0.674814	0.418413	0.469517	0.772905	0.564524	0.732111	0.459662	0.777301	0.61522	0.54108	0.556313	0.448469	0.580819
TCGA_TCGA-CQ-6224	0.21229	0.521738	0.59954	0.678204	0.7489	0.817788	0.30397	0.674087	0.462583	0.760944	0.800443	0.489182	0.469051	0.791683	0.593982	0.787173	0.238967	0.768513	0.706029	0.624114	0.594558	0.391572	0.507799
TCGA_TCGA-CV-A6K2	0.106707	0.628968	0.663652	0.653245	0.73715	0.785422	0.303674	0.652685	0.395047	0.814711	0.725567	0.475907	0.508388	0.809406	0.54929	0.723901	0.570601	0.768299	0.593217	0.587515	0.559135	0.429676	0.579333
TCGA_TCGA-CV-6433	0.371244	0.829984	0.858797	0.703329	0.767452	0.608438	0.312338	0.62773	0.501503	0.776303	0.894808	0.471756	0.545583	0.815521	0.617957	0.724152	0.178982	0.743362	0.638984	0.572931	0.625242	0.515308	0.60296
TCGA_TCGA-CR-6482	0.695712	0.783956	0.811902	0.68192	0.767895	0.708417	0.367077	0.700405	0.681362	0.777951	0.907491	0.461025	0.551779	0.859025	0.600182	0.783841	0.254063	0.770922	0.748713	0.614597	0.63605	0.408258	0.610594
TCGA_TCGA-DQ-7588	0.177755	0.579685	0.501857	0.578149	0.731246	0.787067	0.221688	0.611984	0.120867	0.748391	0.507555	0.339033	0.473498	0.796692	0.537397	0.597765	0.387484	0.727726	0.447725	0.470623	0.49424	0.379573	0.623524
TCGA_TCGA-CV-A45X	0.116269	0.580784	0.521737	0.650749	0.748493	0.769386	0.36416	0.658976	0.340431	0.755296	0.633157	0.403629	0.4745	0.775466	0.499041	0.658282	0.65218	0.761807	0.49744	0.576827	0.524433	0.456624	0.544193
TCGA_TCGA-D6-A74Q	0.304048	0.614319	0.746293	0.658692	0.752047	0.807391	0.360643	0.629606	0.395168	0.765931	0.686161	0.395897	0.595862	0.800881	0.520908	0.682634	0.369365	0.74188	0.449837	0.514819	0.543293	0.513154	0.529882
TCGA_TCGA-CR-6480	0.196566	0.66762	0.655526	0.680086	0.683413	0.698809	0.294294	0.657464	0.403649	0.787232	0.654109	0.425079	0.477272	0.791386	0.498994	0.688799	0.358216	0.732488	0.487896	0.543538	0.507328	0.507002	0.528491
TCGA_TCGA-QK-A6IG	0.220201	0.678383	0.746676	0.658932	0.754539	0.754117	0.38981	0.693293	0.345812	0.777617	0.786869	0.498292	0.529183	0.817524	0.597888	0.756617	0.38516	0.746661	0.622268	0.560286	0.559456	0.322378	0.551449
TCGA_TCGA-T2-A6WX	0.374966	0.656242	0.900817	0.69545	0.771812	0.766149	0.316506	0.681938	0.548043	0.799429	0.903578	0.479532	0.481162	0.816908	0.614042	0.732927	0.41433	0.739447	0.71221	0.59581	0.628857	0.451608	0.558739
TCGA_TCGA-CV-6952	0.244597	0.625789	0.669467	0.658551	0.749788	0.750482	0.400686	0.682367	0.424516	0.768861	0.744394	0.417604	0.591304	0.754946	0.572324	0.695524	0.622957	0.765588	0.613056	0.593429	0.579802	0.432607	0.592152
TCGA_TCGA-CR-7392	0.451714	0.62738	0.747647	0.65189	0.750351	0.742303	0.370908	0.737661	0.599708	0.782097	0.857896	0.486415	0.669551	0.842679	0.609063	0.781237	0.545189	0.812798	0.731769	0.639167	0.630519	0.398751	0.587205
TCGA_TCGA-IQ-A61H	0.171078	0.60491	0.589206	0.613681	0.724979	0.754708	0.26844	0.645567	0.27818	0.79036	0.641764	0.455674	0.517379	0.773915	0.54122	0.673682	0.336881	0.735843	0.531415	0.520261	0.513608	0.349979	0.571881
TCGA_TCGA-HD-A6HZ	0.333402	0.701966	0.698698	0.738354	0.728255	0.767718	0.331083	0.713715	0.466277	0.782108	0.840237	0.486703	0.612834	0.775226	0.618193	0.717143	0.473993	0.776572	0.677029	0.610324	0.630735	0.43305	0.564776
TCGA_TCGA-CV-A45Q	0.0843499	0.522092	0.703607	0.663559	0.731428	0.738512	0.395785	0.63165	0.26569	0.737337	0.717708	0.471275	0.55441	0.816979	0.537418	0.624955	0.576286	0.734315	0.549303	0.545233	0.530552	0.41244	0.51503
TCGA_TCGA-CQ-7065	0.0839523	0.371142	0.469677	0.539348	0.738148	0.764279	0.282968	0.642298	0.2742	0.763661	0.497871	0.392586	0.511959	0.786405	0.495998	0.62026	0.465457	0.78662	0.546099	0.520605	0.458287	0.398714	0.553937
TCGA_TCGA-D6-6515	0.336907	0.627251	0.828403	0.695053	0.789196	0.716358	0.289391	0.683104	0.558282	0.852953	0.889561	0.600361	0.576292	0.845834	0.603403	0.801966	0.428636	0.76513	0.768924	0.659471	0.643733	0.424133	0.612693
TCGA_TCGA-F7-A622	0.107733	0.570465	0.56341	0.642509	0.770077	0.790613	0.218917	0.662081	0.273613	0.802495	0.622218	0.42398	0.491555	0.79972	0.542624	0.636351	0.539063	0.719279	0.455536	0.547271	0.499129	0.43174	0.575736
TCGA_TCGA-CV-6943	0.42381	0.647257	0.887552	0.681311	0.731923	0.750242	0.376654	0.733401	0.564512	0.774482	0.907804	0.525749	0.631229	0.825964	0.598429	0.809754	0.498391	0.786149	0.764736	0.681946	0.687014	0.43818	0.566558
TCGA_TCGA-CV-7183	0.0844578	0.415651	0.518184	0.596559	0.71198	0.789457	0.273686	0.652215	0.213411	0.753828	0.571448	0.347244	0.528956	0.824046	0.477498	0.64167	0.634393	0.788921	0.461297	0.545534	0.497218	0.390757	0.564106
TCGA_TCGA-CV-7407	0.154183	0.580193	0.70472	0.682413	0.742543	0.794832	0.437742	0.669893	0.451972	0.790789	0.780201	0.534408	0.481174	0.798518	0.569857	0.706231	0.23102	0.716238	0.658278	0.591283	0.594717	0.425913	0.565012
TCGA_TCGA-CN-6988	0	0.495627	0.505264	0.584157	0.688591	0.747652	0.2403	0.621901	0.278594	0.746455	0.534585	0.321006	0.437958	0.755437	0.439474	0.655876	0.35915	0.760637	0.351941	0.540702	0.430045	0.520002	0.515646
TCGA_TCGA-CV-7238	0.30121	0.57735	0.73293	0.68251	0.759719	0.786218	0.314573	0.692077	0.409264	0.749848	0.787815	0.432665	0.483617	0.791437	0.581778	0.734634	0.490339	0.781091	0.663113	0.587598	0.594423	0.402683	0.503646
TCGA_TCGA-BA-A6DD	0.332075	0.665595	0.790374	0.672812	0.744651	0.749998	0.340824	0.695135	0.456096	0.782178	0.794546	0.459011	0.476434	0.775058	0.557504	0.710121	0.477074	0.76647	0.641059	0.584211	0.602966	0.442757	0.567513
TCGA_TCGA-P3-A6T2	0.116589	0.643786	0.552473	0.618248	0.750753	0.690477	0.359793	0.666321	0.285589	0.758126	0.664996	0.412266	0.474529	0.791756	0.579282	0.674532	0.422771	0.740988	0.580205	0.487487	0.549111	0.378055	0.626681
TCGA_TCGA-CV-7261	0.150295	0.635758	0.537596	0.617157	0.741372	0.714413	0.342741	0.670194	0.370527	0.767705	0.675116	0.462931	0.630333	0.766535	0.556496	0.691727	0.220125	0.771346	0.605825	0.518893	0.526017	0.341983	0.586337
TCGA_TCGA-CV-7415	0.230857	0.590394	0.727316	0.654692	0.751225	0.756391	0.275133	0.664709	0.424716	0.752854	0.800332	0.481178	0.451004	0.800916	0.599799	0.689065	0.392604	0.744076	0.63556	0.618672	0.590112	0.431344	0.521806
TCGA_TCGA-CN-5366	0.209749	0.527434	0.708346	0.599408	0.741317	0.77157	0.253827	0.708073	0.392613	0.764324	0.758758	0.430583	0.459441	0.794326	0.583672	0.706034	0.446053	0.756151	0.643691	0.601729	0.572292	0.394474	0.555501
TCGA_TCGA-CQ-7072	0.135903	0.468201	0.538688	0.622741	0.709042	0.781778	0.261282	0.652875	0.32083	0.742215	0.672592	0.41473	0.434214	0.794568	0.591181	0.742939	0.17852	0.778791	0.633899	0.57929	0.555289	0.337742	0.540178
TCGA_TCGA-CV-7411	0.185414	0.563188	0.591573	0.663199	0.710034	0.755746	0.367771	0.681714	0.337129	0.777434	0.669223	0.397413	0.465267	0.827389	0.537029	0.692879	0.557525	0.768378	0.551502	0.5947	0.557905	0.429445	0.533831
TCGA_TCGA-CN-5355	0.265106	0.606452	0.556826	0.633839	0.707295	0.727108	0.385556	0.671727	0.348871	0.770661	0.697596	0.385019	0.658916	0.792414	0.52542	0.710808	0.497386	0.804781	0.544151	0.585693	0.565561	0.3867	0.591836
TCGA_TCGA-CN-6022	0.144713	0.622122	0.560011	0.698353	0.751834	0.721408	0.286246	0.684452	0.409585	0.778319	0.816775	0.516192	0.571343	0.81167	0.593239	0.766158	0.378345	0.782981	0.764102	0.619763	0.597532	0.412465	0.532893
TCGA_TCGA-H7-A6C4	0.244771	0.621315	0.627649	0.659312	0.751024	0.7775	0.442531	0.655193	0.418662	0.756824	0.706145	0.407032	0.653489	0.785483	0.566353	0.732872	0.626047	0.783403	0.609523	0.612164	0.577045	0.449649	0.537244
TCGA_TCGA-BA-A6DB	0.380777	0.621191	0.888543	0.68316	0.744406	0.749284	0.419888	0.714966	0.504982	0.792527	0.850816	0.490263	0.652172	0.808542	0.596395	0.757037	0.495306	0.774652	0.691659	0.656071	0.619678	0.419822	0.53495
TCGA_TCGA-CV-7101	0.368164	0.62374	0.636671	0.663241	0.737401	0.730271	0.366666	0.690287	0.501713	0.844409	0.78271	0.482471	0.62258	0.796184	0.558069	0.721949	0.41132	0.773682	0.65644	0.586126	0.552712	0.401538	0.547401
TCGA_TCGA-CQ-6225	0.068224	0.568771	0.495201	0.622773	0.732455	0.794947	0.208837	0.62613	0.190386	0.787992	0.555268	0.395475	0.426198	0.77142	0.507932	0.588978	0.411147	0.758549	0.398268	0.526724	0.444751	0.410452	0.478446
TCGA_TCGA-BA-5558	0.234505	0.616743	0.706025	0.691587	0.759282	0.740339	0.445353	0.720252	0.449989	0.793903	0.83139	0.505203	0.773637	0.811667	0.575638	0.72868	0.604325	0.795049	0.689511	0.619095	0.561753	0.401463	0.568028
TCGA_TCGA-CN-4729	0.217015	0.60582	0.538378	0.628791	0.730149	0.758995	0.416968	0.686399	0.362183	0.761155	0.67778	0.420011	0.706853	0.789542	0.565154	0.699295	0.577653	0.806949	0.597647	0.592692	0.555137	0.417125	0.548163
TCGA_TCGA-CV-5971	0.311415	0.586799	0.759881	0.662808	0.764039	0.764377	0.483102	0.710936	0.491418	0.839505	0.842016	0.509466	0.702031	0.822365	0.576149	0.796414	0.280898	0.787957	0.730048	0.625901	0.651823	0.388865	0.548096
TCGA_TCGA-BA-A6DJ	0.177051	0.659768	0.778666	0.723743	0.754622	0.722319	0.399526	0.691082	0.457293	0.742311	0.773025	0.459144	0.594469	0.811345	0.580423	0.701804	0.559189	0.765098	0.620261	0.566703	0.590936	0.466648	0.524205
TCGA_TCGA-CQ-A4C7	0.0500956	0.592777	0.611355	0.653645	0.743567	0.749774	0.349479	0.701452	0.339993	0.749701	0.714754	0.452364	0.425478	0.782051	0.576057	0.78359	0.375624	0.746017	0.601593	0.560977	0.54021	0.37465	0.551776
TCGA_TCGA-CV-7095	0.124781	0.54465	0.567661	0.652345	0.739667	0.766947	0.312772	0.647091	0.386308	0.752323	0.692661	0.361362	0.432733	0.798009	0.573513	0.687751	0.442184	0.725244	0.590423	0.558416	0.511585	0.443875	0.539952
TCGA_TCGA-D6-6824	0.315726	0.587943	0.734049	0.673026	0.752765	0.716184	0.28907	0.716398	0.489615	0.86132	0.853467	0.535654	0.695156	0.835529	0.557339	0.780482	0.428433	0.821595	0.755899	0.580365	0.61724	0.435539	0.596457
TCGA_TCGA-CV-A6JT	0.174677	0.431351	0.722148	0.667011	0.764671	0.812281	0.356412	0.711739	0.417883	0.711376	0.770053	0.433268	0.544112	0.807642	0.555323	0.74665	0.509475	0.759487	0.651628	0.610584	0.57059	0.431989	0.477643
TCGA_TCGA-CN-6010	0.318268	0.611433	0.616445	0.606876	0.73354	0.718042	0.244023	0.62166	0.375989	0.794585	0.668802	0.435429	0.506176	0.795746	0.531558	0.662824	0.210686	0.750988	0.534288	0.511243	0.504691	0.365318	0.539656
TCGA_TCGA-P3-A5Q5	0.423624	0.736291	0.937632	0.718937	0.70266	0.794017	0.311221	0.692621	0.624596	0.837177	0.968289	0.57077	0.548432	0.848124	0.592362	0.765568	0.296313	0.754494	0.719341	0.680012	0.628908	0.448869	0.514473
TCGA_TCGA-D6-A6EK	0.334933	0.593869	0.851088	0.692985	0.726554	0.765065	0.325708	0.713547	0.490011	0.748846	0.827012	0.456782	0.536975	0.829548	0.521545	0.680091	0.547479	0.763713	0.620102	0.604818	0.596431	0.437329	0.54295
TCGA_TCGA-BA-A4IG	0.401189	0.737011	0.681765	0.635246	0.709906	0.746406	0.346625	0.615945	0.431233	0.783857	0.678194	0.419585	0.60351	0.796778	0.548885	0.662137	0.363197	0.724533	0.511787	0.536456	0.544441	0.372184	0.625848
TCGA_TCGA-WA-A7GZ	0.0730079	0.573063	0.494587	0.594794	0.733497	0.817521	0.248639	0.674635	0.222241	0.713818	0.596479	0.405722	0.482121	0.790659	0.526365	0.661881	0.352477	0.770467	0.47194	0.528496	0.496635	0.391669	0.573284
TCGA_TCGA-CR-7368	0.234208	0.682114	0.655787	0.671526	0.705123	0.745907	0.368408	0.688736	0.437088	0.792837	0.739791	0.454653	0.614509	0.791574	0.545133	0.721003	0.437745	0.744335	0.591282	0.582768	0.55218	0.425859	0.618204
TCGA_TCGA-CN-A49B	0.244722	0.717522	0.762992	0.67986	0.791081	0.769191	0.427194	0.701133	0.476094	0.811801	0.856326	0.538048	0.615264	0.781038	0.607911	0.745319	0.387267	0.714823	0.686029	0.584259	0.600085	0.476343	0.623738
TCGA_TCGA-P3-A6SW	0.395785	0.705143	0.807304	0.667528	0.732059	0.767748	0.286879	0.665853	0.499947	0.736577	0.810164	0.510772	0.503264	0.766006	0.575921	0.674003	0.265015	0.731621	0.550572	0.570149	0.571532	0.388573	0.506885
TCGA_TCGA-BA-6873	0.205307	0.626598	0.667359	0.621121	0.747466	0.715631	0.331894	0.658845	0.407477	0.748541	0.717143	0.427315	0.453445	0.804605	0.577802	0.731154	0.393712	0.735067	0.585325	0.556503	0.549921	0.369389	0.560379
TCGA_TCGA-UF-A7JK	0.0432387	0.412592	0.472945	0.569034	0.713352	0.796129	0.234563	0.636776	0.197523	0.753584	0.50869	0.405966	0.434517	0.7696	0.498059	0.608911	0.402285	0.767061	0.508316	0.523791	0.469831	0.431972	0.552219
TCGA_TCGA-CQ-A4C9	0.210396	0.604797	0.544785	0.611321	0.718046	0.792843	0.307103	0.652287	0.31548	0.789168	0.664681	0.438931	0.530971	0.782049	0.533151	0.69328	0.39902	0.74354	0.520005	0.553701	0.51212	0.425381	0.565111
TCGA_TCGA-CN-4739	0.369281	0.71829	0.736302	0.705237	0.687066	0.745669	0.256257	0.629779	0.468795	0.77959	0.773972	0.492495	0.51965	0.825088	0.483656	0.730541	0.587048	0.788072	0.527048	0.582156	0.566171	0.481196	0.519387
TCGA_TCGA-CN-4735	0.273299	0.702495	0.700374	0.707458	0.772696	0.73398	0.383663	0.643465	0.475991	0.769255	0.841095	0.533583	0.605683	0.757827	0.633348	0.708295	0.249031	0.728225	0.709027	0.564846	0.608963	0.442614	0.65016
TCGA_TCGA-CV-7091	0.18629	0.589728	0.636455	0.633764	0.749489	0.819622	0.336501	0.638273	0.313621	0.757468	0.683336	0.408585	0.569139	0.812567	0.56127	0.669036	0.422379	0.748115	0.586753	0.526134	0.564334	0.415594	0.549219
TCGA_TCGA-CV-A45Y	0.408338	0.656538	0.75337	0.693467	0.742233	0.779601	0.378839	0.725713	0.497298	0.740995	0.863864	0.518343	0.537151	0.796833	0.606494	0.720362	0.459487	0.788442	0.715071	0.619232	0.619009	0.414587	0.543843
TCGA_TCGA-CV-7243	0.119223	0.444737	0.524538	0.621825	0.769473	0.76235	0.303887	0.66123	0.31226	0.739711	0.584561	0.389959	0.426853	0.784046	0.544958	0.683984	0.275134	0.744667	0.472173	0.541448	0.504227	0.394849	0.531176
TCGA_TCGA-CN-6011	0.102417	0.447929	0.627616	0.603535	0.760586	0.752656	0.256903	0.701748	0.351296	0.77879	0.733996	0.40119	0.445932	0.819868	0.564791	0.712477	0.434612	0.744827	0.569034	0.567243	0.532485	0.40854	0.497001
TCGA_TCGA-CQ-5325	0.522883	0.694049	0.864359	0.675939	0.770385	0.717904	0.384976	0.762772	0.647265	0.802988	0.938932	0.503332	0.647103	0.811643	0.639014	0.780815	0.527883	0.778275	0.765403	0.671303	0.66608	0.408426	0.555638
TCGA_TCGA-CN-A49C	0.212929	0.629947	0.651192	0.685761	0.708499	0.743749	0.230417	0.651356	0.362918	0.78842	0.674545	0.473683	0.413412	0.790657	0.54962	0.671084	0.444074	0.732036	0.504029	0.538707	0.542996	0.506511	0.594972
TCGA_TCGA-DQ-7591	0.447159	0.814793	0.827058	0.725166	0.72168	0.726114	0.366232	0.615925	0.491464	0.713437	0.783787	0.495726	0.459709	0.798314	0.535229	0.693837	0.131136	0.73641	0.65887	0.530576	0.57785	0.437237	0.603186
TCGA_TCGA-UF-A71D	0.231689	0.547298	0.605141	0.623692	0.674481	0.754859	0.279995	0.628915	0.390082	0.751553	0.602181	0.397732	0.509687	0.794464	0.454884	0.624148	0.373704	0.72005	0.432693	0.543997	0.503223	0.472403	0.532756
TCGA_TCGA-CV-7242	0.409527	0.637732	0.762113	0.706043	0.738463	0.721789	0.27653	0.5885	0.455357	0.807088	0.746519	0.392747	0.524973	0.800559	0.50847	0.700198	0.388926	0.785368	0.543761	0.561472	0.549828	0.407294	0.494242
TCGA_TCGA-CN-6023	0.34491	0.748208	0.801705	0.649819	0.735423	0.720774	0.319479	0.647661	0.513072	0.85124	0.811544	0.49616	0.500342	0.826292	0.587534	0.705048	0.141612	0.725998	0.58117	0.589961	0.569379	0.323208	0.510522
TCGA_TCGA-DQ-5629	0.214045	0.622045	0.494701	0.596748	0.727018	0.714699	0.223593	0.612357	0.255029	0.746193	0.562788	0.381635	0.464989	0.780195	0.54398	0.661779	0.311222	0.684193	0.467014	0.483737	0.498699	0.361819	0.578449
TCGA_TCGA-UF-A7JT	0.308283	0.646925	0.889973	0.675986	0.770882	0.72911	0.320395	0.741971	0.522351	0.802221	0.915876	0.564707	0.526948	0.799351	0.624604	0.775173	0.523706	0.751592	0.731077	0.636268	0.630593	0.440132	0.572819
TCGA_TCGA-BA-A6DE	0.178662	0.556389	0.595474	0.613232	0.739119	0.750292	0.315163	0.613578	0.309318	0.729718	0.567028	0.33704	0.498779	0.782341	0.517458	0.653814	0.44004	0.770619	0.44751	0.541197	0.50015	0.365857	0.570327
TCGA_TCGA-CV-6937	0.0272176	0.5453	0.54643	0.678379	0.757888	0.754004	0.3397	0.633227	0.303684	0.766228	0.69099	0.472681	0.370752	0.772991	0.523005	0.643745	0.332429	0.768458	0.573399	0.546753	0.530433	0.415779	0.413679
TCGA_TCGA-CN-5369	0.364024	0.666255	0.810265	0.692321	0.766341	0.731043	0.368971	0.707828	0.559033	0.822026	0.885222	0.503223	0.592934	0.81669	0.603178	0.757588	0.597882	0.815817	0.70353	0.642009	0.63906	0.443052	0.578188
TCGA_TCGA-CN-6024	0.0827861	0.497073	0.450908	0.617275	0.72061	0.754148	0.360405	0.659404	0.178853	0.754112	0.573497	0.418516	0.598655	0.790583	0.570796	0.662258	0.376661	0.754305	0.477883	0.535985	0.478483	0.355424	0.587311
TCGA_TCGA-CV-6934	0.221325	0.584877	0.76497	0.690566	0.739772	0.759857	0.398319	0.70686	0.465055	0.778629	0.884847	0.539485	0.676925	0.79875	0.63037	0.776662	0.338485	0.765406	0.766887	0.662126	0.64835	0.380981	0.550349
TCGA_TCGA-F7-8298	0.155958	0.659685	0.581688	0.666834	0.735351	0.789993	0.272407	0.703452	0.330123	0.77442	0.712992	0.391425	0.538382	0.80034	0.635055	0.728437	0.298651	0.729105	0.639683	0.56903	0.567765	0.360167	0.595393
TCGA_TCGA-CV-A468	0.36774	0.654848	0.884814	0.670369	0.757051	0.736555	0.433975	0.671901	0.491366	0.788732	0.857821	0.490945	0.610697	0.789533	0.586188	0.746666	0.441629	0.78799	0.69735	0.683636	0.633501	0.430826	0.553329
TCGA_TCGA-CV-7424	0.302383	0.586502	0.71087	0.615379	0.736923	0.748124	0.275384	0.638105	0.372902	0.801735	0.720933	0.515578	0.47511	0.787372	0.568487	0.706482	0.125566	0.765385	0.594074	0.542457	0.550411	0.343517	0.471544
TCGA_TCGA-CN-5374	0.507263	0.729912	0.857739	0.681372	0.737197	0.757715	0.276292	0.636291	0.484702	0.762377	0.789452	0.460742	0.454929	0.811335	0.552939	0.732149	0.245077	0.694891	0.550706	0.574233	0.58921	0.443028	0.543378
TCGA_TCGA-BA-5152	0.287022	0.700377	0.779967	0.682376	0.777044	0.767421	0.40636	0.686366	0.479236	0.782588	0.830379	0.504381	0.590452	0.799538	0.592116	0.737186	0.478811	0.757021	0.688446	0.569607	0.606578	0.481072	0.564755
TCGA_TCGA-UF-A7J9	0.0542551	0.588951	0.565962	0.65014	0.721379	0.721472	0.25268	0.675322	0.338254	0.785318	0.719222	0.476962	0.502556	0.741841	0.564381	0.720036	0.182173	0.777462	0.652086	0.597197	0.546991	0.407526	0.584542
TCGA_TCGA-CR-7377	0.403963	0.655238	0.778816	0.661776	0.75667	0.714453	0.365443	0.712882	0.540696	0.789343	0.868378	0.477898	0.625952	0.803049	0.583762	0.754939	0.370873	0.780977	0.712768	0.659794	0.651251	0.381295	0.561887
TCGA_TCGA-CV-A460	0.384985	0.7486	0.764495	0.700328	0.739657	0.777467	0.348108	0.640638	0.504261	0.767212	0.85998	0.502307	0.633618	0.812509	0.606184	0.754073	0.339195	0.771448	0.666959	0.632036	0.637597	0.456992	0.579046
TCGA_TCGA-CX-7082	0.141267	0.597768	0.586583	0.629773	0.740245	0.764222	0.33105	0.663732	0.335272	0.703435	0.655203	0.397833	0.473585	0.75289	0.555038	0.714156	0.188916	0.742588	0.512397	0.556884	0.520481	0.383554	0.569408
TCGA_TCGA-RS-A6TP	0.0980583	0.62451	0.664733	0.620127	0.731669	0.787974	0.274757	0.674234	0.260172	0.735528	0.636791	0.363736	0.423546	0.800666	0.552445	0.627892	0.214572	0.686048	0.482801	0.467643	0.51026	0.501592	0.514041
TCGA_TCGA-CR-6474	0.21238	0.621162	0.636674	0.710787	0.756181	0.791576	0.456124	0.722993	0.410067	0.797242	0.787279	0.52673	0.758422	0.806243	0.596022	0.74642	0.467776	0.796046	0.719475	0.619294	0.612272	0.412967	0.581539
TCGA_TCGA-IQ-A6SG	0.0426715	0.541212	0.517558	0.617729	0.717933	0.738877	0.32638	0.676885	0.236353	0.790465	0.638068	0.429746	0.469703	0.767835	0.540854	0.698366	0.394086	0.775649	0.539366	0.534338	0.49736	0.353038	0.558426
TCGA_TCGA-CR-7389	0.307657	0.483542	0.527255	0.633664	0.706609	0.763471	0.35778	0.734301	0.475439	0.781736	0.729625	0.459568	0.607698	0.822086	0.514716	0.728666	0.491325	0.800608	0.632875	0.601147	0.569879	0.405056	0.560239
TCGA_TCGA-CN-A63U	0.211021	0.568885	0.584027	0.593962	0.748391	0.755901	0.325086	0.598543	0.27573	0.814022	0.556611	0.427608	0.508846	0.778942	0.465726	0.633249	0.156601	0.692206	0.370949	0.497338	0.484149	0.300154	0.479763
TCGA_TCGA-P3-A6T0	0.123264	0.524019	0.525294	0.618853	0.672099	0.762384	0.250945	0.595382	0.260853	0.760344	0.574357	0.370281	0.456511	0.788114	0.603132	0.625056	0.294201	0.756465	0.546469	0.475301	0.492529	0.346886	0.542704
TCGA_TCGA-CR-7383	0.336692	0.64461	0.711907	0.667664	0.746315	0.802789	0.337183	0.703538	0.47955	0.782599	0.808178	0.509896	0.596775	0.797123	0.62551	0.764544	0.344207	0.72657	0.739986	0.59935	0.630256	0.362458	0.550198
TCGA_TCGA-UF-A7JA	0.0724352	0.474201	0.525081	0.599435	0.690891	0.798976	0.300872	0.680299	0.210744	0.751832	0.559159	0.428777	0.451494	0.773971	0.548495	0.674942	0.354273	0.760658	0.587066	0.508823	0.495363	0.371322	0.497954
TCGA_TCGA-CV-5435	0.131947	0.491195	0.494201	0.621575	0.716279	0.757316	0.358898	0.587946	0.267416	0.81981	0.560006	0.424147	0.532983	0.774381	0.552897	0.715271	0.157903	0.730298	0.520793	0.520716	0.474924	0.380246	0.616532
TCGA_TCGA-CN-6012	0.339031	0.662093	0.687797	0.650781	0.743132	0.75085	0.298369	0.698715	0.445466	0.802849	0.791098	0.48788	0.453475	0.794367	0.525367	0.728446	0.367658	0.756332	0.637421	0.596144	0.56225	0.382153	0.474209
TCGA_TCGA-KU-A66T	0.160278	0.599701	0.480425	0.671359	0.714987	0.829982	0.278297	0.662576	0.210351	0.7536	0.548362	0.372134	0.511354	0.771485	0.554004	0.653055	0.420229	0.753114	0.485108	0.522575	0.503206	0.386333	0.593045
TCGA_TCGA-CV-7252	0.225183	0.603923	0.623812	0.698139	0.761606	0.756424	0.389975	0.68079	0.375535	0.787387	0.72428	0.404337	0.488304	0.818072	0.585192	0.734162	0.416917	0.770951	0.589638	0.553514	0.563724	0.401978	0.605431
TCGA_TCGA-MZ-A5BI	0.560835	0.761275	0.813184	0.771362	0.772368	0.725631	0.388253	0.669692	0.592742	0.796765	0.871709	0.583076	0.65762	0.796191	0.593426	0.735442	0.501761	0.768765	0.710927	0.622369	0.67015	0.531516	0.627335
TCGA_TCGA-QK-A8ZA	0.0562918	0.539375	0.499964	0.601253	0.731186	0.807267	0.264813	0.64086	0.224096	0.799093	0.568401	0.379607	0.419836	0.759899	0.509134	0.637927	0.30035	0.72929	0.493777	0.488596	0.480799	0.370557	0.56173
TCGA_TCGA-HD-A4C1	0.171728	0.600214	0.549627	0.60106	0.725736	0.725079	0.367084	0.641965	0.323469	0.77899	0.624446	0.402994	0.484234	0.78731	0.508271	0.69313	0.524201	0.798629	0.515632	0.553279	0.534304	0.392374	0.614314
TCGA_TCGA-CN-6994	0.0901023	0.542623	0.565852	0.677251	0.725152	0.74303	0.312905	0.732463	0.329543	0.766187	0.722642	0.473974	0.443744	0.790288	0.521636	0.718295	0.389352	0.772912	0.630114	0.563219	0.535899	0.418314	0.533618
TCGA_TCGA-P3-A6T6	0.0569204	0.573794	0.57185	0.539727	0.750351	0.784772	0.275182	0.620213	0.200212	0.766197	0.563815	0.328729	0.371771	0.782282	0.455576	0.661341	0.248052	0.668492	0.390472	0.502495	0.470969	0.379999	0.456615
TCGA_TCGA-CR-6473	0.192147	0.726087	0.622867	0.630625	0.750617	0.746202	0.287382	0.565904	0.293153	0.762322	0.606114	0.342378	0.434053	0.782759	0.585285	0.699057	0.259808	0.724008	0.487982	0.449091	0.535464	0.507408	0.654646
TCGA_TCGA-CV-7255	0.100966	0.5144	0.487438	0.580296	0.742005	0.753708	0.238307	0.633315	0.249752	0.743086	0.570164	0.341165	0.520032	0.794355	0.542788	0.739098	0.482217	0.75951	0.533404	0.484592	0.498226	0.391472	0.563702
TCGA_TCGA-BA-A8YP	0.192029	0.60908	0.49441	0.628172	0.7318	0.678594	0.357926	0.635204	0.297756	0.758359	0.668473	0.417667	0.591581	0.761464	0.545294	0.738162	0.0956441	0.745454	0.58431	0.537783	0.494631	0.267302	0.554874
GSE65858_GSM1607684	0.54939	0.799846	0.942394	0.717601	0.752708	0.746172	0.317912	0.716983	0.657896	0.786211	0.951979	0.531976	0.640999	0.836651	0.61745	0.811849	0.412146	0.772102	0.742623	0.665112	0.67913	0.421319	0.521167
GSE65858_GSM1607685	0.387361	0.758503	0.713056	0.691343	0.72176	0.73167	0.338918	0.612932	0.43561	0.759127	0.727922	0.414773	0.526717	0.838822	0.581377	0.684264	0.2312	0.734027	0.581808	0.49192	0.59698	0.428084	0.528757
GSE65858_GSM1607686	0.0604672	0.475578	0.541502	0.639148	0.768075	0.692984	0.267328	0.674418	0.332875	0.75899	0.762982	0.375955	0.596959	0.804716	0.563713	0.72788	0.334559	0.786212	0.599675	0.588726	0.500759	0.388068	0.569834
GSE65858_GSM1607687	0.0649196	0.652258	0.631805	0.685953	0.677851	0.715043	0.298981	0.625914	0.34275	0.760282	0.673359	0.48012	0.549175	0.785012	0.562052	0.722795	0.327942	0.748725	0.517279	0.519598	0.524884	0.466813	0.615095
GSE65858_GSM1607688	0.365968	0.729228	0.659152	0.639505	0.694423	0.71294	0.392478	0.666144	0.455469	0.74023	0.751506	0.450896	0.433174	0.766495	0.534551	0.715408	0.410341	0.764586	0.524469	0.576088	0.534844	0.441758	0.554993
GSE65858_GSM1607689	0.214597	0.563794	0.625295	0.648989	0.705481	0.776955	0.430807	0.627608	0.332591	0.79017	0.716413	0.466548	0.587642	0.814609	0.487691	0.74662	0.444694	0.807132	0.524341	0.577439	0.533809	0.410786	0.532948
GSE65858_GSM1607690	0.248752	0.754915	0.779492	0.703169	0.716876	0.736683	0.339354	0.656537	0.49577	0.785623	0.871996	0.491335	0.53983	0.820114	0.548598	0.753675	0.34	0.780696	0.625719	0.577921	0.595477	0.39682	0.588895
GSE65858_GSM1607691	0.121389	0.588434	0.459932	0.607448	0.68745	0.7355	0.289904	0.639167	0.247953	0.764905	0.539342	0.342853	0.400507	0.756082	0.476884	0.639863	0.333406	0.770599	0.455054	0.522845	0.479619	0.413718	0.538491
GSE65858_GSM1607692	0.129825	0.550402	0.547905	0.6546	0.748002	0.777162	0.304496	0.650766	0.27575	0.726913	0.657514	0.428239	0.492128	0.75316	0.54403	0.705893	0.359363	0.735071	0.515992	0.527754	0.522801	0.366462	0.549882
GSE65858_GSM1607693	0.182244	0.523736	0.688344	0.676533	0.741181	0.735607	0.364758	0.670869	0.429196	0.767189	0.778797	0.4437	0.539207	0.779378	0.625779	0.79785	0.233333	0.764367	0.648398	0.589629	0.584622	0.322377	0.542657
GSE65858_GSM1607694	0.260241	0.396686	0.597479	0.637864	0.754186	0.740937	0.325638	0.711022	0.335112	0.7616	0.647676	0.453106	0.626756	0.785038	0.53969	0.74004	0.386183	0.799339	0.633939	0.582532	0.551531	0.356745	0.56933
GSE65858_GSM1607695	0.165693	0.612181	0.61404	0.643027	0.707826	0.720439	0.402375	0.621895	0.307335	0.826197	0.691214	0.40287	0.585494	0.764259	0.503374	0.732783	0.502375	0.82226	0.528696	0.602599	0.53378	0.409786	0.503461
GSE65858_GSM1607696	0.205899	0.565318	0.532018	0.613909	0.718828	0.777038	0.300274	0.668762	0.362425	0.737113	0.672082	0.410802	0.52495	0.792443	0.554724	0.699096	0.459463	0.755798	0.63428	0.553056	0.53543	0.392409	0.514217
GSE65858_GSM1607697	0.627454	0.690755	0.922861	0.685953	0.757463	0.777888	0.31316	0.722708	0.636412	0.741221	0.90405	0.506364	0.477017	0.845816	0.595451	0.798091	0.232664	0.788741	0.68734	0.628727	0.629564	0.358269	0.54482
GSE65858_GSM1607698	0.158102	0.543852	0.671787	0.670262	0.741481	0.767847	0.323304	0.645047	0.442481	0.749058	0.746966	0.446793	0.429652	0.773947	0.529947	0.782654	0.327262	0.77209	0.644205	0.557597	0.55661	0.389875	0.534764
GSE65858_GSM1607699	0.113921	0.506639	0.664263	0.639963	0.701628	0.769274	0.318759	0.690975	0.324603	0.743932	0.671735	0.379858	0.521949	0.782599	0.549719	0.72654	0.414662	0.751803	0.476406	0.555505	0.541134	0.402319	0.546486
GSE65858_GSM1607700	0.100323	0.557476	0.50605	0.733458	0.73998	0.829626	0.273653	0.645197	0.377085	0.748221	0.69352	0.438354	0.477451	0.783474	0.57299	0.6817	0.459156	0.765709	0.629316	0.511306	0.4949	0.373567	0.595097
GSE65858_GSM1607701	0.374919	0.406571	0.656837	0.667032	0.74457	0.673673	0.232999	0.628805	0.427605	0.782397	0.6821	0.496102	0.616097	0.834286	0.496747	0.732112	0.214362	0.837032	0.566363	0.581706	0.55214	0.386652	0.526391
GSE65858_GSM1607702	0.231865	0.779499	0.810831	0.749979	0.753301	0.682261	0.267163	0.636797	0.444805	0.76144	0.863349	0.47237	0.671291	0.811688	0.586811	0.733261	0.351764	0.72914	0.665775	0.601582	0.614056	0.434566	0.585848
GSE65858_GSM1607703	0.150456	0.546173	0.513356	0.704856	0.728651	0.79129	0.364542	0.64192	0.25022	0.730758	0.64578	0.389465	0.542058	0.809016	0.564265	0.708096	0.452532	0.743451	0.486499	0.537126	0.519017	0.344244	0.522298
GSE65858_GSM1607704	0.186629	0.625073	0.643709	0.628173	0.73895	0.689564	0.247954	0.621803	0.291229	0.812533	0.677943	0.393289	0.523361	0.835102	0.510331	0.676685	0.266775	0.75428	0.471452	0.468923	0.520893	0.437988	0.545987
GSE65858_GSM1607705	0.258967	0.604818	0.519442	0.661696	0.736581	0.722456	0.319174	0.666594	0.341743	0.784935	0.673167	0.431937	0.558418	0.762019	0.545427	0.725506	0.397157	0.791735	0.57538	0.571115	0.520264	0.362633	0.544217
GSE65858_GSM1607706	0.448303	0.749217	0.829306	0.730824	0.721053	0.727044	0.416182	0.700486	0.594367	0.738537	0.930097	0.515596	0.638542	0.816321	0.657226	0.764386	0.226068	0.774298	0.773572	0.630788	0.643267	0.406231	0.564838
GSE65858_GSM1607707	0.0654687	0.66922	0.646608	0.672369	0.716285	0.719632	0.203018	0.655712	0.325509	0.748428	0.636977	0.432058	0.397013	0.783715	0.524059	0.697844	0.352712	0.754156	0.476633	0.510591	0.512682	0.486391	0.532198
GSE65858_GSM1607708	0.120408	0.720602	0.780742	0.681232	0.731092	0.701307	0.302628	0.685746	0.393279	0.746273	0.728303	0.369427	0.524306	0.760943	0.562856	0.779824	0.2587	0.717808	0.556314	0.536026	0.549024	0.417825	0.568611
GSE65858_GSM1607709	0.143382	0.60621	0.600453	0.782505	0.730887	0.767886	0.499605	0.76055	0.468192	0.839424	0.871997	0.620841	0.762587	0.827617	0.628036	0.796169	0.671356	0.836511	0.74726	0.61499	0.655401	0.381103	0.563749
GSE65858_GSM1607710	0.3357	0.652575	0.663906	0.66035	0.764827	0.768236	0.349946	0.674921	0.447335	0.766717	0.754422	0.39651	0.5268	0.781057	0.574113	0.714662	0.448677	0.764238	0.659236	0.544646	0.558358	0.418631	0.581828
GSE65858_GSM1607711	0.232371	0.66839	0.728259	0.686782	0.727988	0.69068	0.321452	0.611869	0.406775	0.71207	0.772073	0.418756	0.574089	0.786026	0.579485	0.716396	0.184679	0.767831	0.585727	0.537698	0.600012	0.310169	0.603842
GSE65858_GSM1607712	0.0280626	0.346126	0.507203	0.633332	0.683509	0.81986	0.365141	0.575362	0.218842	0.802053	0.592182	0.391912	0.408425	0.79551	0.441723	0.631984	0.507631	0.793329	0.412937	0.560866	0.464577	0.362695	0.446227
GSE65858_GSM1607713	0.211155	0.579926	0.848574	0.71806	0.740058	0.79099	0.197097	0.652119	0.430075	0.730678	0.777914	0.499216	0.445482	0.791459	0.513409	0.693448	0.401391	0.735556	0.602115	0.577722	0.541674	0.460579	0.516898
GSE65858_GSM1607714	0.128296	0.465243	0.441929	0.637676	0.750241	0.838162	0.233513	0.648636	0.269828	0.75708	0.583781	0.340378	0.491171	0.825909	0.592148	0.649397	0.384623	0.69404	0.502517	0.514937	0.454991	0.404245	0.552337
GSE65858_GSM1607715	0.173687	0.598269	0.678934	0.658649	0.732775	0.753001	0.279631	0.658995	0.414702	0.790245	0.685044	0.406474	0.472956	0.789892	0.51734	0.710689	0.408276	0.737037	0.514464	0.516031	0.5328	0.483948	0.578391
GSE65858_GSM1607716	0.394818	0.634066	0.732802	0.685357	0.746677	0.794391	0.331289	0.618552	0.438971	0.77294	0.773072	0.507116	0.533157	0.839395	0.57289	0.74634	0.338921	0.77939	0.637527	0.564843	0.553593	0.408634	0.51969
GSE65858_GSM1607717	0.366151	0.494425	0.810824	0.688667	0.721798	0.771617	0.347048	0.629484	0.455548	0.740948	0.795047	0.422803	0.527613	0.824165	0.572569	0.73952	0.61824	0.841581	0.54107	0.600969	0.551025	0.421952	0.528872
GSE65858_GSM1607718	0.0660074	0.546735	0.485728	0.582551	0.716046	0.698922	0.240063	0.599485	0.193341	0.741484	0.555001	0.413091	0.484697	0.769381	0.488255	0.666486	0.213401	0.679535	0.473765	0.487649	0.487118	0.393787	0.544524
GSE65858_GSM1607719	0.194629	0.667693	0.707308	0.678764	0.753991	0.720452	0.36244	0.619758	0.397075	0.78402	0.763771	0.499163	0.670246	0.803114	0.616589	0.778744	0.209615	0.765041	0.627679	0.572276	0.591335	0.429173	0.547488
GSE65858_GSM1607720	0.51875	0.688847	0.808728	0.694839	0.710706	0.756912	0.35615	0.65657	0.572151	0.766552	0.832243	0.400037	0.619599	0.846174	0.568221	0.744231	0.405043	0.828792	0.574896	0.57942	0.606268	0.410301	0.520838
GSE65858_GSM1607721	0.284509	0.813748	0.764133	0.687124	0.741004	0.692793	0.332921	0.589407	0.419901	0.776043	0.746279	0.414369	0.503692	0.781393	0.590204	0.668586	0.337335	0.72692	0.58549	0.518049	0.554525	0.545808	0.624583
GSE65858_GSM1607722	0.257122	0.564702	0.613265	0.63024	0.718096	0.776631	0.354079	0.662178	0.352614	0.751718	0.650391	0.388335	0.561582	0.788105	0.519866	0.797251	0.336781	0.75585	0.56388	0.555368	0.543956	0.393918	0.551754
GSE65858_GSM1607723	0.105982	0.392114	0.536996	0.701035	0.727103	0.742124	0.208956	0.664372	0.285323	0.766512	0.645591	0.442279	0.382853	0.785324	0.524807	0.672755	0.445206	0.786647	0.566036	0.550281	0.505794	0.402405	0.48274
GSE65858_GSM1607724	0.112865	0.564699	0.633904	0.720576	0.739504	0.735579	0.388792	0.745628	0.431606	0.788313	0.837901	0.596951	0.575098	0.803884	0.588925	0.759343	0.53104	0.791777	0.738339	0.622949	0.56404	0.407779	0.530961
GSE65858_GSM1607725	0.106866	0.555249	0.591104	0.721626	0.775852	0.826018	0.180141	0.690785	0.324792	0.733891	0.683493	0.465007	0.47589	0.770803	0.552941	0.708326	0.353593	0.717635	0.566989	0.473468	0.511867	0.358653	0.505084
GSE65858_GSM1607726	0.689625	0.743759	0.850536	0.664753	0.725087	0.728642	0.436371	0.689361	0.714713	0.737941	0.940571	0.411278	0.619766	0.848718	0.613273	0.731034	0.247954	0.805257	0.685441	0.626701	0.653038	0.363706	0.49976
GSE65858_GSM1607727	0.509265	0.664553	0.741155	0.68997	0.696595	0.75986	0.309082	0.715479	0.515992	0.789247	0.841388	0.511258	0.644711	0.810506	0.567162	0.729496	0.411984	0.814093	0.612259	0.599036	0.596948	0.418927	0.527839
GSE65858_GSM1607728	0.06233	0.387886	0.473082	0.624967	0.710019	0.728421	0.243575	0.62139	0.207595	0.784687	0.58017	0.441739	0.480988	0.768348	0.493809	0.697567	0.371619	0.774518	0.496782	0.589928	0.498886	0.358881	0.480022
GSE65858_GSM1607729	0.190071	0.576515	0.649316	0.633952	0.71304	0.756339	0.325245	0.673519	0.35814	0.75263	0.714621	0.407378	0.611385	0.777345	0.552354	0.76039	0.473307	0.792984	0.600184	0.589182	0.593127	0.355324	0.598654
GSE65858_GSM1607730	0.146951	0.630717	0.676197	0.654807	0.729625	0.75809	0.343245	0.664215	0.33463	0.753862	0.710774	0.446781	0.49897	0.738706	0.548854	0.713022	0.311277	0.73172	0.59653	0.511062	0.528529	0.414747	0.593989
GSE65858_GSM1607731	0.131183	0.466229	0.508757	0.652244	0.676278	0.750557	0.287072	0.673069	0.314965	0.789647	0.661606	0.357333	0.467049	0.775298	0.522256	0.657625	0.60166	0.759878	0.526087	0.600655	0.52063	0.399043	0.557477
GSE65858_GSM1607732	0.084381	0.526243	0.514502	0.621532	0.725055	0.761847	0.303977	0.658706	0.242711	0.735653	0.590809	0.362975	0.480053	0.741813	0.51302	0.684931	0.435677	0.73408	0.49541	0.527579	0.526141	0.411166	0.527479
GSE65858_GSM1607733	0.436864	0.610539	0.784615	0.675467	0.752145	0.838335	0.311149	0.703379	0.49376	0.805063	0.818036	0.531378	0.617886	0.854746	0.5942	0.739786	0.345644	0.815512	0.636168	0.594004	0.564182	0.351621	0.51981
GSE65858_GSM1607734	0.513867	0.684819	0.582364	0.781882	0.724085	0.794677	0.452867	0.725822	0.512731	0.742292	0.874123	0.575862	0.681628	0.869102	0.655401	0.784852	0.524207	0.794874	0.800001	0.646128	0.631654	0.340121	0.499623
GSE65858_GSM1607735	0.0313051	0.55081	0.485492	0.641316	0.719072	0.754436	0.293842	0.622468	0.237029	0.733908	0.573822	0.353738	0.541259	0.786365	0.508506	0.716969	0.213349	0.740249	0.415447	0.535772	0.48163	0.474102	0.501311
GSE65858_GSM1607736	0.268801	0.655308	0.761669	0.64658	0.696981	0.719149	0.36705	0.643041	0.474152	0.80821	0.760171	0.430575	0.534897	0.762903	0.51073	0.703136	0.422384	0.7778	0.579699	0.611158	0.579506	0.429628	0.524937
GSE65858_GSM1607737	0.112567	0.560759	0.567646	0.642366	0.779888	0.723843	0.255475	0.634464	0.287613	0.741352	0.649519	0.396605	0.445364	0.751605	0.518698	0.70146	0.384201	0.753835	0.52383	0.531038	0.524592	0.409054	0.60416
GSE65858_GSM1607738	0.527338	0.677797	0.931604	0.710701	0.728077	0.741009	0.405117	0.687784	0.609266	0.763442	0.924538	0.486028	0.552544	0.856602	0.599323	0.802499	0.473987	0.820974	0.676418	0.634522	0.634726	0.424433	0.584465
GSE65858_GSM1607739	0.518294	0.77223	0.743953	0.694093	0.69901	0.748978	0.343782	0.672636	0.605831	0.765651	0.845574	0.437567	0.50777	0.79895	0.597598	0.749266	0.392897	0.77163	0.632101	0.601702	0.613675	0.408859	0.527809
GSE65858_GSM1607740	0.119016	0.557345	0.661689	0.738201	0.763778	0.721503	0.260376	0.728129	0.328518	0.791191	0.759285	0.486107	0.691751	0.795635	0.588234	0.784631	0.619427	0.780287	0.706565	0.545736	0.574986	0.407491	0.599227
GSE65858_GSM1607741	0.105652	0.444094	0.506248	0.667797	0.723701	0.785761	0.275321	0.662451	0.329742	0.727705	0.71018	0.465687	0.593599	0.793279	0.5566	0.719034	0.279011	0.771689	0.716855	0.578038	0.54913	0.389691	0.487243
GSE65858_GSM1607742	0.0307542	0.521991	0.483309	0.70379	0.728601	0.787361	0.200039	0.677358	0.247321	0.82802	0.650205	0.482893	0.528074	0.787719	0.568393	0.677732	0.460435	0.751144	0.617062	0.535922	0.502354	0.35424	0.574941
GSE65858_GSM1607743	0.222126	0.530147	0.574141	0.594635	0.708835	0.741847	0.21859	0.654408	0.261068	0.753764	0.61233	0.417709	0.517505	0.80137	0.509516	0.734204	0.365133	0.78284	0.506177	0.530423	0.510284	0.440654	0.542378
GSE65858_GSM1607744	0.193455	0.491369	0.621396	0.630478	0.691659	0.775671	0.264042	0.694081	0.350952	0.757762	0.721132	0.414779	0.47516	0.814865	0.544641	0.69897	0.464981	0.788978	0.548193	0.555998	0.532502	0.423627	0.541593
GSE65858_GSM1607745	0.111602	0.688732	0.652141	0.753443	0.747211	0.74295	0.342774	0.683937	0.398953	0.739743	0.692091	0.483503	0.520135	0.802533	0.508226	0.738529	0.552128	0.71711	0.523792	0.519192	0.563478	0.521787	0.52228
GSE65858_GSM1607746	0.113251	0.491311	0.619641	0.64843	0.751943	0.784892	0.314094	0.618701	0.287146	0.763869	0.626681	0.376275	0.332785	0.808647	0.533624	0.635977	0.317201	0.771972	0.531784	0.497983	0.49025	0.395497	0.448413
GSE65858_GSM1607747	0.148296	0.548267	0.59086	0.686246	0.72215	0.771711	0.362737	0.690412	0.392869	0.753806	0.699236	0.374178	0.634287	0.757351	0.542275	0.725196	0.520495	0.759652	0.489947	0.58512	0.534145	0.388729	0.588959
GSE65858_GSM1607748	0.606526	0.76322	0.754391	0.711247	0.699429	0.73445	0.34933	0.675397	0.587715	0.76881	0.850403	0.472682	0.506841	0.771091	0.559609	0.733166	0.168633	0.757698	0.644691	0.588673	0.591037	0.347143	0.504343
GSE65858_GSM1607749	0.330616	0.769138	0.871768	0.706144	0.757221	0.70622	0.482101	0.752446	0.562913	0.785727	0.924273	0.528778	0.770235	0.786795	0.64913	0.793963	0.523262	0.788684	0.74583	0.643717	0.67313	0.444692	0.640738
GSE65858_GSM1607750	0.0759356	0.670562	0.59905	0.686905	0.719139	0.74821	0.298202	0.625027	0.340796	0.754798	0.705692	0.405851	0.426922	0.748192	0.569527	0.708141	0.227922	0.700135	0.540224	0.492492	0.511546	0.36094	0.627921
GSE65858_GSM1607751	0.169021	0.639139	0.768788	0.666363	0.725754	0.738481	0.346578	0.643073	0.446931	0.793525	0.760523	0.41499	0.522929	0.776612	0.563116	0.736433	0.465543	0.786759	0.574317	0.545916	0.556198	0.392946	0.570361
GSE65858_GSM1607752	0.273197	0.568193	0.694897	0.659936	0.737144	0.71998	0.224079	0.70909	0.465566	0.756451	0.766366	0.443557	0.574016	0.802286	0.579994	0.757458	0.561156	0.769234	0.651535	0.629378	0.571873	0.423607	0.506036
GSE65858_GSM1607753	0.16674	0.639188	0.618349	0.749859	0.753995	0.778626	0.47153	0.739756	0.508993	0.800606	0.855115	0.512015	0.731489	0.779967	0.659503	0.790518	0.604094	0.823596	0.765904	0.708682	0.655666	0.565682	0.553106
GSE65858_GSM1607754	0.143953	0.552928	0.58835	0.662031	0.681353	0.743204	0.338262	0.653825	0.282805	0.770905	0.637511	0.38969	0.50745	0.7673	0.489779	0.658223	0.372649	0.731777	0.461566	0.5052	0.51118	0.387848	0.534707
GSE65858_GSM1607755	0.0861007	0.529411	0.544044	0.578889	0.664286	0.718243	0.387301	0.586453	0.226152	0.739117	0.584998	0.381302	0.524747	0.795093	0.542425	0.715946	0.224204	0.713701	0.443942	0.451232	0.510623	0.328416	0.493824
GSE65858_GSM1607756	0.264444	0.615628	0.682796	0.688142	0.725943	0.744447	0.407187	0.727543	0.445274	0.793145	0.783652	0.500031	0.740721	0.773426	0.592945	0.774917	0.477875	0.823028	0.679088	0.640527	0.60156	0.411353	0.571786
GSE65858_GSM1607757	0.153114	0.609463	0.762104	0.6875	0.749598	0.73932	0.407888	0.67007	0.382228	0.765932	0.727367	0.463516	0.604931	0.789686	0.607122	0.755965	0.589178	0.788132	0.644051	0.573915	0.585463	0.408867	0.579288
GSE65858_GSM1607758	0.754111	0.737753	0.802499	0.673696	0.720355	0.768061	0.357853	0.597832	0.724006	0.736946	0.925651	0.457404	0.45179	0.875222	0.547541	0.670175	0.212309	0.790217	0.606717	0.618924	0.614307	0.331504	0.479765
GSE65858_GSM1607759	0.1805	0.56365	0.575456	0.663232	0.726787	0.753192	0.208547	0.663269	0.346937	0.770991	0.709443	0.393781	0.504676	0.803684	0.541344	0.729237	0.481666	0.788654	0.5783	0.552537	0.516403	0.381208	0.533694
GSE65858_GSM1607760	0.0608928	0.51782	0.491649	0.640889	0.736572	0.718031	0.30426	0.607561	0.281613	0.769801	0.549547	0.32696	0.463745	0.755471	0.52395	0.638562	0.201366	0.697161	0.450235	0.522972	0.500073	0.339444	0.522527
GSE65858_GSM1607761	0.0733578	0.536665	0.497705	0.591005	0.736332	0.733982	0.275489	0.666303	0.251754	0.743104	0.595236	0.465952	0.480876	0.74903	0.507476	0.756356	0.150069	0.718143	0.515632	0.557051	0.491951	0.374619	0.592933
GSE65858_GSM1607762	0.409938	0.697977	0.77993	0.705531	0.761369	0.719178	0.322941	0.68771	0.486698	0.779711	0.839741	0.435008	0.637451	0.820354	0.577109	0.748853	0.478394	0.814702	0.604679	0.567113	0.590368	0.428922	0.603081
GSE65858_GSM1607763	0.0833833	0.588556	0.539808	0.668269	0.717647	0.77588	0.253251	0.668835	0.337831	0.740979	0.641374	0.360836	0.396	0.738033	0.544803	0.693217	0.337787	0.73362	0.531082	0.514153	0.487955	0.379998	0.59763
GSE65858_GSM1607764	0.140153	0.529907	0.624983	0.667154	0.719254	0.803268	0.326999	0.665966	0.3357	0.725177	0.749926	0.480761	0.515071	0.845961	0.557819	0.70505	0.394499	0.755347	0.68259	0.521639	0.539318	0.415434	0.49471
GSE65858_GSM1607765	0.336028	0.756294	0.89314	0.732281	0.741589	0.721369	0.249609	0.649347	0.495449	0.755297	0.915946	0.516452	0.538449	0.828685	0.618777	0.7621	0.286571	0.744251	0.699439	0.605229	0.631577	0.474714	0.605033
GSE65858_GSM1607766	0.220991	0.564107	0.587941	0.671974	0.732411	0.756666	0.307721	0.642975	0.328524	0.783232	0.614714	0.417311	0.508021	0.804697	0.517803	0.69962	0.436968	0.750879	0.521363	0.54406	0.515908	0.351905	0.538647
GSE65858_GSM1607767	0.150276	0.527017	0.573818	0.657094	0.686924	0.768678	0.303884	0.65363	0.338804	0.780095	0.736456	0.45949	0.52526	0.805654	0.553621	0.739583	0.520679	0.805734	0.593053	0.522986	0.536368	0.36892	0.57696
GSE65858_GSM1607768	0.271615	0.560669	0.653902	0.740834	0.781458	0.7908	0.326672	0.633481	0.335143	0.753849	0.7483	0.497462	0.501799	0.820217	0.540717	0.721617	0.399749	0.769147	0.553119	0.556739	0.525389	0.419947	0.501548
GSE65858_GSM1607769	0.0879515	0.521619	0.515051	0.67139	0.701663	0.737819	0.334041	0.641994	0.300136	0.771664	0.646404	0.379673	0.481432	0.772496	0.541838	0.676909	0.480649	0.752631	0.480467	0.52459	0.50254	0.423585	0.562415
GSE65858_GSM1607770	0.170266	0.560516	0.60954	0.745027	0.745529	0.760539	0.266349	0.6791	0.404946	0.788748	0.785839	0.508516	0.648653	0.802164	0.553448	0.75139	0.535126	0.813831	0.643293	0.577797	0.534573	0.364624	0.540827
GSE65858_GSM1607771	0.478137	0.76187	0.939918	0.671215	0.767802	0.696785	0.315312	0.688923	0.565285	0.776465	0.905133	0.49043	0.534125	0.857352	0.587151	0.78195	0.159263	0.789532	0.672276	0.624445	0.623279	0.414772	0.554616
GSE65858_GSM1607772	0.374504	0.693541	0.816214	0.700693	0.71785	0.771302	0.323959	0.594891	0.461566	0.742494	0.862178	0.446335	0.481215	0.818132	0.609496	0.707016	0.277657	0.749994	0.602757	0.549759	0.621283	0.447487	0.497957
GSE65858_GSM1607773	0.139622	0.5193	0.631948	0.713756	0.749519	0.810204	0.347213	0.624447	0.289379	0.77265	0.715905	0.405171	0.479483	0.792453	0.587167	0.735459	0.462096	0.772323	0.597574	0.590494	0.542941	0.423311	0.530628
GSE65858_GSM1607774	0.107392	0.585269	0.579883	0.624578	0.697206	0.729832	0.267338	0.710126	0.310822	0.796458	0.599264	0.431831	0.525744	0.760745	0.500943	0.696122	0.27679	0.743165	0.543813	0.537868	0.527053	0.433868	0.567356
GSE65858_GSM1607775	0.0826834	0.642086	0.540491	0.659026	0.704186	0.762675	0.334241	0.697486	0.360216	0.748219	0.646418	0.417375	0.5803	0.758093	0.567831	0.728643	0.362724	0.743216	0.627203	0.559278	0.553487	0.391376	0.566609
GSE65858_GSM1607776	0.103015	0.46899	0.498215	0.621316	0.709562	0.768103	0.366652	0.625153	0.21142	0.696502	0.583957	0.402104	0.492585	0.792717	0.55811	0.736321	0.30526	0.752751	0.538399	0.530313	0.519872	0.385512	0.485715
GSE65858_GSM1607777	0.136536	0.650172	0.567215	0.676068	0.716279	0.804627	0.260385	0.711383	0.347041	0.755793	0.684427	0.40887	0.496087	0.78576	0.594553	0.683566	0.404281	0.742558	0.580937	0.533435	0.547199	0.324446	0.638998
GSE65858_GSM1607778	0.236429	0.564051	0.613316	0.684838	0.702586	0.70763	0.280513	0.593963	0.450611	0.785272	0.718401	0.421766	0.520941	0.798058	0.505638	0.654648	0.421301	0.742437	0.60117	0.480785	0.506864	0.458049	0.519251
GSE65858_GSM1607779	0.17332	0.560321	0.587379	0.662262	0.698495	0.746349	0.273591	0.615338	0.369419	0.774387	0.691204	0.430874	0.480673	0.814276	0.532174	0.754997	0.327975	0.745601	0.513858	0.534082	0.535264	0.380546	0.505277
GSE65858_GSM1607780	0.176847	0.541795	0.559228	0.627256	0.762329	0.777545	0.262359	0.628735	0.259356	0.74838	0.549703	0.47378	0.517734	0.775356	0.472646	0.634972	0.368813	0.704538	0.444201	0.549826	0.466389	0.35384	0.575058
GSE65858_GSM1607781	0.222498	0.705569	0.668748	0.691331	0.75059	0.787144	0.460277	0.690713	0.389923	0.84099	0.741649	0.506714	0.6862	0.77633	0.51885	0.694462	0.446999	0.79757	0.610396	0.573655	0.557234	0.413953	0.521874
GSE65858_GSM1607782	0.241062	0.587193	0.660968	0.691335	0.740792	0.724267	0.409193	0.732017	0.440532	0.767721	0.795186	0.45177	0.628365	0.796522	0.596624	0.764355	0.389141	0.813202	0.680894	0.640071	0.591286	0.361091	0.554086
GSE65858_GSM1607783	0.525755	0.674939	0.8434	0.688089	0.716248	0.724667	0.245017	0.687231	0.591109	0.782857	0.887994	0.47024	0.599765	0.827407	0.565215	0.796084	0.351389	0.836613	0.672685	0.578479	0.627759	0.47567	0.506537
GSE65858_GSM1607784	0.135334	0.526218	0.601173	0.665037	0.742227	0.745268	0.315494	0.651627	0.297824	0.776258	0.698471	0.42862	0.563259	0.75849	0.540894	0.721203	0.370604	0.775762	0.566198	0.574313	0.553662	0.416989	0.5908
GSE65858_GSM1607785	0.119964	0.52093	0.639513	0.653847	0.748657	0.692631	0.336012	0.648542	0.322988	0.739483	0.646036	0.392733	0.411178	0.783791	0.543737	0.699248	0.55188	0.773609	0.514292	0.546722	0.537753	0.412196	0.545124
GSE65858_GSM1607786	0.135006	0.581511	0.57556	0.699794	0.726927	0.755717	0.311541	0.666769	0.331771	0.788681	0.649976	0.376053	0.567042	0.73719	0.528217	0.719925	0.596504	0.760982	0.549456	0.541839	0.500538	0.424989	0.56782
GSE65858_GSM1607787	0.142995	0.585373	0.564961	0.644045	0.754065	0.767614	0.21856	0.624487	0.258593	0.723058	0.66432	0.445983	0.503403	0.786179	0.559596	0.725934	0.365118	0.745927	0.531797	0.508274	0.504499	0.381183	0.591348
GSE65858_GSM1607788	0.200864	0.602105	0.778421	0.688774	0.739034	0.788478	0.351852	0.705623	0.376205	0.749072	0.786928	0.434624	0.445046	0.77982	0.541427	0.738557	0.411759	0.777407	0.589403	0.564343	0.549717	0.482575	0.468013
GSE65858_GSM1607789	0.198592	0.548705	0.621475	0.629157	0.727358	0.734822	0.388852	0.69942	0.445999	0.756042	0.751093	0.400424	0.656299	0.781315	0.53527	0.709882	0.397615	0.774249	0.661518	0.585288	0.605579	0.374194	0.5932
GSE65858_GSM1607790	0.0903282	0.509278	0.493141	0.63296	0.706359	0.773558	0.188965	0.691112	0.194978	0.734803	0.581081	0.380382	0.417936	0.781999	0.535229	0.692747	0.387495	0.746245	0.592086	0.503679	0.48277	0.360077	0.570939
GSE65858_GSM1607791	0.383387	0.666332	0.737158	0.724164	0.73852	0.75107	0.388345	0.717554	0.467739	0.776587	0.860828	0.587861	0.709147	0.836554	0.57753	0.764125	0.400025	0.824064	0.707333	0.57387	0.617794	0.415395	0.508936
GSE65858_GSM1607792	0.0379058	0.51625	0.534301	0.64361	0.74047	0.733818	0.257049	0.643479	0.259562	0.799119	0.578337	0.392927	0.512165	0.751087	0.483725	0.672203	0.474791	0.758188	0.466677	0.542178	0.486993	0.375032	0.556828
GSE65858_GSM1607793	0.212251	0.697211	0.713411	0.675986	0.692168	0.766759	0.370857	0.722208	0.501796	0.778947	0.834204	0.474087	0.5772	0.766658	0.608459	0.802612	0.386125	0.733497	0.686125	0.614038	0.563646	0.354448	0.582963
GSE65858_GSM1607794	0.19929	0.580561	0.591656	0.621745	0.71442	0.690588	0.34184	0.614652	0.367216	0.755974	0.676257	0.418119	0.4536	0.793246	0.515863	0.712105	0.219579	0.769382	0.501718	0.581503	0.53181	0.430808	0.509896
GSE65858_GSM1607795	0.30378	0.581386	0.722038	0.714348	0.745235	0.803161	0.436517	0.6007	0.464863	0.764593	0.750663	0.391159	0.539903	0.837246	0.594948	0.709758	0.56429	0.772177	0.538537	0.56171	0.578684	0.40391	0.504634
GSE65858_GSM1607796	0.20366	0.620779	0.545891	0.638377	0.700865	0.757267	0.38311	0.609218	0.352845	0.787536	0.626229	0.40787	0.450186	0.759371	0.496015	0.654309	0.144875	0.720876	0.491457	0.50916	0.501282	0.408184	0.571568
GSE65858_GSM1607797	0.183878	0.627432	0.540883	0.638423	0.760201	0.742342	0.221418	0.672285	0.383454	0.766422	0.721497	0.400007	0.455366	0.781634	0.617394	0.692656	0.332812	0.747694	0.62752	0.560398	0.494814	0.315573	0.516699
GSE65858_GSM1607798	0.184055	0.563845	0.68974	0.649941	0.713442	0.761	0.318641	0.639045	0.347796	0.776194	0.663434	0.412928	0.512327	0.775079	0.52175	0.711708	0.470972	0.782591	0.511725	0.563898	0.543619	0.385845	0.564167
GSE65858_GSM1607799	0.154695	0.461061	0.547636	0.658401	0.720008	0.783472	0.282657	0.648753	0.308692	0.78766	0.645812	0.377071	0.537341	0.782717	0.498141	0.65765	0.609638	0.811508	0.524137	0.567958	0.502626	0.410221	0.514223
GSE65858_GSM1607800	0.232159	0.531876	0.755001	0.68646	0.696377	0.831109	0.295175	0.641363	0.389275	0.823529	0.706216	0.533425	0.545943	0.791578	0.46008	0.715872	0.393219	0.765815	0.537109	0.568121	0.537639	0.410392	0.515961
GSE65858_GSM1607801	0.189965	0.660779	0.741809	0.666093	0.775503	0.710787	0.314064	0.685381	0.443107	0.762861	0.750867	0.390003	0.442236	0.793602	0.575563	0.742402	0.252198	0.742678	0.590111	0.544545	0.556303	0.459813	0.612541
GSE65858_GSM1607802	0.200583	0.699842	0.638368	0.654176	0.719024	0.707437	0.3136	0.695939	0.396429	0.74204	0.696849	0.405412	0.480021	0.763202	0.6003	0.775057	0.26965	0.72088	0.607297	0.527027	0.554377	0.325799	0.604703
GSE65858_GSM1607803	0.149376	0.623898	0.526439	0.656119	0.697344	0.703324	0.336381	0.604204	0.268541	0.766071	0.638327	0.426515	0.553646	0.758078	0.542573	0.695575	0.388359	0.722601	0.509954	0.545529	0.507354	0.378355	0.631245
GSE65858_GSM1607804	0.10571	0.631999	0.532025	0.679459	0.69614	0.758043	0.388636	0.722757	0.310035	0.796543	0.692645	0.436427	0.606559	0.773077	0.535999	0.689543	0.582211	0.75155	0.683999	0.565412	0.585654	0.384149	0.54347
GSE65858_GSM1607805	0.209047	0.587879	0.748416	0.652964	0.709884	0.80674	0.394856	0.662616	0.405275	0.760083	0.779022	0.428158	0.667478	0.796006	0.540598	0.699469	0.383164	0.765172	0.610087	0.562642	0.555947	0.411105	0.548786
GSE65858_GSM1607806	0.226006	0.502677	0.555968	0.689719	0.785302	0.66446	0.392908	0.582852	0.402107	0.705262	0.696248	0.445978	0.54803	0.785025	0.565684	0.719695	0.190803	0.780089	0.501019	0.519988	0.535435	0.357228	0.552395
GSE65858_GSM1607807	0.278205	0.495925	0.564345	0.668178	0.724071	0.737873	0.405077	0.662209	0.339023	0.712501	0.722566	0.465624	0.646403	0.816854	0.604745	0.767355	0.330598	0.811116	0.614454	0.588638	0.560977	0.40855	0.501564
GSE65858_GSM1607808	0.122816	0.569089	0.556916	0.684937	0.714211	0.742233	0.355447	0.658645	0.412657	0.740828	0.715217	0.441545	0.545171	0.810082	0.572583	0.749599	0.367565	0.738171	0.632057	0.526742	0.548007	0.384963	0.60813
GSE65858_GSM1607809	0.130746	0.498116	0.588918	0.678342	0.74625	0.800621	0.245511	0.693311	0.287384	0.762488	0.640921	0.368965	0.574108	0.743792	0.513283	0.681789	0.535541	0.756882	0.569428	0.540402	0.509539	0.449003	0.551796
GSE65858_GSM1607810	0.131337	0.631728	0.624111	0.66592	0.676339	0.776767	0.358259	0.694202	0.396894	0.758225	0.772585	0.436648	0.492387	0.792587	0.590089	0.754422	0.33187	0.754063	0.586672	0.58689	0.562108	0.436111	0.530916
GSE65858_GSM1607811	0.162744	0.559266	0.530847	0.635953	0.707301	0.723777	0.271576	0.612718	0.288918	0.737193	0.622261	0.3492	0.52208	0.743498	0.528312	0.65391	0.405833	0.704246	0.512006	0.522749	0.513707	0.359467	0.551322
GSE65858_GSM1607812	0.1548	0.579532	0.63008	0.625487	0.739403	0.774969	0.252254	0.650477	0.322614	0.760491	0.612222	0.418305	0.414535	0.791063	0.514245	0.665366	0.268742	0.768586	0.518017	0.504504	0.490544	0.338239	0.607228
GSE65858_GSM1607813	0.184395	0.467899	0.660728	0.662232	0.744769	0.790608	0.343527	0.628401	0.3057	0.774992	0.689007	0.454385	0.497512	0.812186	0.481236	0.687752	0.397813	0.763139	0.490122	0.539863	0.51411	0.408267	0.527328
GSE65858_GSM1607814	0.0927688	0.554379	0.537059	0.712098	0.70879	0.72902	0.276517	0.65736	0.315125	0.716791	0.701834	0.429311	0.583492	0.767042	0.582726	0.73527	0.342618	0.763154	0.637876	0.545128	0.555879	0.367175	0.575401
GSE65858_GSM1607815	0.106286	0.47167	0.534012	0.63458	0.728243	0.759354	0.331762	0.623513	0.282486	0.7825	0.624092	0.384772	0.432596	0.792549	0.527987	0.721065	0.386183	0.768526	0.522464	0.52002	0.499305	0.380025	0.520773
GSE65858_GSM1607816	0.172422	0.591028	0.575614	0.772031	0.741926	0.719332	0.539596	0.770091	0.490785	0.843165	0.928639	0.649955	0.842643	0.845416	0.677611	0.854811	0.648553	0.874596	0.820372	0.642713	0.663664	0.449713	0.533962
GSE65858_GSM1607817	0.819675	0.812183	0.918792	0.703916	0.742617	0.711933	0.354572	0.66916	0.822499	0.773553	0.935395	0.46795	0.485152	0.860401	0.56125	0.750154	0.310249	0.82552	0.692609	0.682426	0.665935	0.403811	0.522939
GSE65858_GSM1607818	0.290005	0.761906	0.720731	0.680596	0.748609	0.722247	0.334583	0.625109	0.407936	0.762775	0.762776	0.467546	0.566399	0.766377	0.556565	0.715383	0.305175	0.761139	0.57296	0.5702	0.578428	0.404578	0.544374
GSE65858_GSM1607819	0.118122	0.607568	0.518877	0.663205	0.734164	0.725611	0.23969	0.678607	0.292696	0.741871	0.663827	0.427806	0.472589	0.758183	0.58482	0.72333	0.296574	0.761602	0.558972	0.523322	0.509262	0.338386	0.56057
GSE65858_GSM1607820	0.162086	0.573208	0.621226	0.638407	0.738653	0.752572	0.289029	0.653699	0.336706	0.761173	0.627225	0.44002	0.437692	0.790316	0.523042	0.681085	0.270409	0.766605	0.52876	0.50462	0.494711	0.355862	0.618331
GSE65858_GSM1607821	0.119712	0.540287	0.556622	0.666447	0.701538	0.721964	0.297406	0.604236	0.272528	0.799745	0.617594	0.399446	0.528514	0.792773	0.507271	0.711625	0.37434	0.796399	0.520193	0.562266	0.502464	0.378291	0.538813
GSE65858_GSM1607822	0.122855	0.647199	0.687587	0.628897	0.695763	0.77653	0.323005	0.685904	0.370627	0.710401	0.693832	0.427252	0.643831	0.781362	0.599122	0.729732	0.339802	0.748293	0.620536	0.520207	0.591648	0.364241	0.591349
GSE65858_GSM1607823	0.319724	0.712933	0.833258	0.689302	0.748355	0.753325	0.427261	0.710121	0.528745	0.770229	0.894581	0.504875	0.607837	0.811398	0.617701	0.798898	0.498094	0.780472	0.703627	0.653437	0.62719	0.441419	0.543702
GSE65858_GSM1607824	0.375694	0.769169	0.765063	0.712218	0.752133	0.726678	0.365954	0.663755	0.504317	0.813565	0.815259	0.502118	0.58736	0.799362	0.573482	0.743967	0.482394	0.807549	0.611601	0.568864	0.615515	0.403538	0.558027
GSE65858_GSM1607825	0.198637	0.589031	0.491743	0.642257	0.715462	0.767371	0.339828	0.653525	0.286604	0.724391	0.664417	0.444528	0.527598	0.827095	0.562778	0.690606	0.512525	0.747528	0.531681	0.492338	0.530481	0.394676	0.584395
GSE65858_GSM1607826	0.273545	0.579704	0.865678	0.732349	0.717853	0.789166	0.391327	0.663799	0.444367	0.768826	0.835873	0.508862	0.568144	0.821122	0.59742	0.7833	0.432053	0.778207	0.65639	0.639677	0.589218	0.410239	0.583421
GSE65858_GSM1607827	0.248387	0.639697	0.644928	0.650081	0.738721	0.713338	0.382972	0.695659	0.422574	0.76026	0.816647	0.514177	0.451473	0.785118	0.606949	0.753422	0.264588	0.780358	0.704114	0.583297	0.543228	0.433508	0.577997
GSE65858_GSM1607828	0.177049	0.588881	0.686762	0.655314	0.746535	0.729121	0.345271	0.704665	0.475397	0.768846	0.791605	0.439159	0.601528	0.762283	0.565429	0.772628	0.483596	0.782887	0.665856	0.584431	0.574352	0.401918	0.593701
GSE65858_GSM1607829	0.150836	0.614757	0.633075	0.732496	0.766914	0.712653	0.320219	0.713152	0.416379	0.713171	0.724536	0.420085	0.592213	0.748519	0.585316	0.765874	0.373937	0.768179	0.646923	0.585447	0.564982	0.459348	0.559637
GSE65858_GSM1607830	0.121767	0.409038	0.495453	0.660476	0.745641	0.75326	0.206897	0.626809	0.212739	0.760942	0.535656	0.387582	0.359165	0.780076	0.498628	0.640981	0.23258	0.702829	0.381893	0.479193	0.454724	0.326394	0.504384
GSE65858_GSM1607831	0.176724	0.582678	0.684323	0.650505	0.703245	0.698606	0.401168	0.634019	0.370053	0.800389	0.740595	0.450109	0.581573	0.772681	0.490734	0.708957	0.392473	0.769048	0.524363	0.56233	0.538224	0.421998	0.559257
GSE65858_GSM1607832	0.103091	0.587182	0.508317	0.666848	0.725789	0.765963	0.274837	0.644439	0.31817	0.749284	0.685936	0.475697	0.602618	0.792266	0.541651	0.760927	0.175636	0.742688	0.549629	0.512301	0.516706	0.360942	0.457594
GSE65858_GSM1607833	0.187489	0.570795	0.587596	0.704452	0.71574	0.721597	0.368345	0.661378	0.267468	0.757127	0.687403	0.394404	0.556541	0.79354	0.560515	0.691057	0.555639	0.762292	0.569946	0.556734	0.538894	0.444287	0.533663
GSE65858_GSM1607834	0.813938	0.766854	0.877851	0.696889	0.717222	0.674202	0.332651	0.65154	0.789376	0.761786	0.956265	0.455668	0.521499	0.841872	0.6066	0.720722	0.222372	0.819523	0.687144	0.701018	0.662574	0.380189	0.515842
GSE65858_GSM1607835	0.122859	0.567312	0.479508	0.636361	0.722101	0.747639	0.281714	0.651808	0.279684	0.737674	0.61579	0.398285	0.386286	0.779172	0.552791	0.704458	0.43601	0.772449	0.562508	0.536015	0.511046	0.411473	0.543836
GSE65858_GSM1607836	0.159734	0.498388	0.759067	0.632533	0.754008	0.816685	0.186943	0.678235	0.340252	0.744844	0.620781	0.440121	0.627078	0.79017	0.520866	0.656327	0.422957	0.74803	0.511102	0.506792	0.52685	0.487193	0.533741
GSE65858_GSM1607837	0.0755833	0.579889	0.521813	0.723454	0.757599	0.719197	0.345103	0.638915	0.330234	0.713325	0.654415	0.466095	0.588501	0.757917	0.531492	0.737977	0.338608	0.736536	0.659516	0.530224	0.512945	0.379033	0.576385
GSE65858_GSM1607838	0.184496	0.625318	0.758557	0.656524	0.703673	0.774848	0.340113	0.642643	0.401631	0.740328	0.716902	0.382229	0.495234	0.785047	0.598568	0.715796	0.365262	0.745235	0.604227	0.533535	0.549565	0.397238	0.602761
GSE65858_GSM1607839	0.231958	0.580464	0.548921	0.596214	0.741023	0.706263	0.348243	0.698392	0.346407	0.757572	0.645281	0.382491	0.509173	0.740076	0.533761	0.705576	0.254697	0.757647	0.51065	0.54783	0.533214	0.344571	0.572947
GSE65858_GSM1607840	0.103719	0.490641	0.577723	0.634099	0.683467	0.756291	0.322233	0.623713	0.2922	0.810484	0.624344	0.424782	0.550258	0.778544	0.463492	0.715211	0.513802	0.79109	0.570665	0.54942	0.505103	0.400706	0.520506
GSE65858_GSM1607841	0.272896	0.662963	0.790071	0.76438	0.790225	0.795656	0.470284	0.783564	0.546045	0.801715	0.9604	0.631564	0.71021	0.841226	0.682842	0.836509	0.506801	0.814129	0.788081	0.677687	0.642007	0.451187	0.575038
GSE65858_GSM1607842	0.110275	0.597381	0.588716	0.630838	0.753547	0.750828	0.284788	0.643659	0.299367	0.776793	0.620439	0.414039	0.446029	0.743906	0.497027	0.672473	0.366981	0.752635	0.468507	0.535091	0.514213	0.326074	0.536856
GSE65858_GSM1607843	0.273341	0.704913	0.848462	0.672918	0.771079	0.707375	0.300022	0.696423	0.469792	0.722096	0.854824	0.489818	0.600689	0.779262	0.600803	0.784101	0.189628	0.771193	0.661994	0.609534	0.616114	0.442103	0.580128
GSE65858_GSM1607844	0.502616	0.522746	0.713858	0.620608	0.732636	0.747891	0.329139	0.61471	0.414056	0.820184	0.72467	0.421648	0.497945	0.828063	0.489545	0.708801	0.212411	0.801485	0.509491	0.501086	0.534014	0.389547	0.42053
GSE65858_GSM1607845	0.316248	0.825707	0.705951	0.685146	0.704056	0.784609	0.309219	0.623701	0.587534	0.730025	0.847896	0.48178	0.550114	0.855327	0.561991	0.723135	0.241546	0.737495	0.636177	0.573115	0.578446	0.408261	0.582332
GSE65858_GSM1607846	0.0941411	0.554929	0.634664	0.676249	0.713055	0.740828	0.352955	0.619406	0.278282	0.791347	0.639335	0.413242	0.530868	0.748181	0.476109	0.694765	0.476695	0.760969	0.47464	0.544224	0.51015	0.458502	0.528623
GSE65858_GSM1607847	0.2977	0.499839	0.622934	0.663466	0.728567	0.761985	0.285763	0.615825	0.373409	0.727206	0.680898	0.464329	0.446199	0.795677	0.523236	0.66759	0.390973	0.742268	0.521228	0.554504	0.525306	0.411256	0.517947
GSE65858_GSM1607848	0.150747	0.495556	0.554687	0.67485	0.715599	0.763259	0.2789	0.635417	0.289678	0.718694	0.684853	0.383137	0.40549	0.785001	0.544558	0.672767	0.416884	0.731709	0.51805	0.578017	0.484472	0.402866	0.483689
GSE65858_GSM1607849	0.16498	0.633646	0.598354	0.791181	0.695961	0.743437	0.472558	0.728245	0.476813	0.857361	0.905261	0.659999	0.896754	0.832758	0.64954	0.823133	0.730831	0.853221	0.800065	0.635386	0.662739	0.394855	0.521914
GSE65858_GSM1607850	0.16285	0.643774	0.597998	0.689288	0.753306	0.744671	0.518575	0.716798	0.545512	0.771911	0.792626	0.458802	0.640477	0.767872	0.618865	0.734074	0.351177	0.812039	0.731002	0.585192	0.615373	0.3675	0.62606
GSE65858_GSM1607851	0.154092	0.587947	0.509541	0.634668	0.738233	0.764047	0.319526	0.6604	0.283319	0.764524	0.607636	0.37394	0.472285	0.76109	0.534103	0.690126	0.384109	0.731093	0.52205	0.497746	0.516384	0.372354	0.586799
GSE65858_GSM1607852	0.137528	0.567414	0.66269	0.691091	0.74517	0.753972	0.208373	0.645578	0.361954	0.797422	0.670491	0.406472	0.547108	0.789164	0.484993	0.705602	0.451671	0.794825	0.560694	0.573455	0.524987	0.435475	0.601783
GSE65858_GSM1607853	0.186466	0.523125	0.558639	0.648467	0.708103	0.727659	0.325611	0.68099	0.324613	0.760613	0.658057	0.379011	0.524165	0.755768	0.52641	0.724831	0.531574	0.776429	0.561482	0.54707	0.501719	0.425091	0.553589
GSE65858_GSM1607854	0.180139	0.59245	0.584559	0.667318	0.745641	0.715698	0.32128	0.702877	0.363359	0.751941	0.698143	0.382141	0.558938	0.792996	0.604993	0.741511	0.542248	0.779583	0.607226	0.556228	0.542704	0.414016	0.588308
GSE65858_GSM1607855	0.199977	0.52277	0.61083	0.638554	0.716794	0.765679	0.260719	0.650834	0.29611	0.773751	0.628678	0.422599	0.496712	0.772493	0.495653	0.69732	0.376303	0.773563	0.471376	0.555281	0.51305	0.417266	0.522111
GSE65858_GSM1607856	0.168133	0.576347	0.580435	0.65834	0.774944	0.730854	0.311777	0.660523	0.329262	0.75559	0.693624	0.399629	0.485909	0.795935	0.563737	0.747265	0.295413	0.761501	0.605939	0.503761	0.538458	0.381509	0.552782
GSE65858_GSM1607857	0.213008	0.704459	0.631787	0.688103	0.742121	0.724045	0.38221	0.66335	0.390105	0.757225	0.776381	0.507099	0.522917	0.767271	0.596385	0.718661	0.164645	0.746945	0.670395	0.555691	0.599065	0.396663	0.604245
GSE65858_GSM1607858	0.111435	0.60059	0.689659	0.658571	0.739429	0.775713	0.352073	0.660565	0.309512	0.750122	0.672547	0.383543	0.512833	0.734477	0.527822	0.694139	0.57716	0.754544	0.587021	0.573261	0.532804	0.402614	0.564583
GSE65858_GSM1607859	0.138495	0.497439	0.539908	0.634913	0.727409	0.701885	0.369759	0.65274	0.330982	0.792595	0.665471	0.447822	0.652728	0.791633	0.526248	0.706938	0.473202	0.751868	0.51613	0.540065	0.49601	0.403212	0.538806
GSE65858_GSM1607860	0.117566	0.552075	0.479657	0.620964	0.704963	0.760544	0.301173	0.663734	0.289069	0.807163	0.635919	0.354744	0.432876	0.774133	0.534807	0.677695	0.423913	0.764863	0.507256	0.505924	0.521374	0.394069	0.505675
GSE65858_GSM1607861	0.282345	0.67948	0.848078	0.704216	0.744049	0.770308	0.392352	0.691662	0.564473	0.758969	0.917139	0.546768	0.681595	0.808732	0.643521	0.78133	0.337769	0.768673	0.666511	0.627234	0.648886	0.447855	0.585266
GSE65858_GSM1607862	0.209218	0.613183	0.661104	0.776011	0.72846	0.774574	0.361736	0.699787	0.386301	0.754462	0.829287	0.542954	0.576713	0.825176	0.604871	0.776352	0.577182	0.809632	0.70824	0.6187	0.579173	0.46394	0.495579
GSE65858_GSM1607863	0.31366	0.543121	0.675746	0.653848	0.697863	0.712241	0.318417	0.61847	0.42667	0.798972	0.667788	0.448269	0.570124	0.78081	0.454773	0.725389	0.419138	0.804437	0.520091	0.556388	0.529131	0.374094	0.486033
GSE65858_GSM1607864	0.112891	0.656631	0.715685	0.732663	0.766289	0.742063	0.326687	0.698289	0.35486	0.772929	0.719178	0.486318	0.523389	0.829923	0.607472	0.768682	0.357199	0.750519	0.696113	0.555483	0.583037	0.37239	0.535224
GSE65858_GSM1607865	0.101622	0.479404	0.473472	0.635614	0.734624	0.817802	0.281439	0.629631	0.286394	0.729553	0.597799	0.38109	0.480296	0.798747	0.541124	0.70166	0.340156	0.767713	0.574515	0.555714	0.524176	0.370569	0.471839
GSE65858_GSM1607866	0.122539	0.664731	0.615784	0.651687	0.726016	0.76425	0.286794	0.657092	0.331789	0.766759	0.707368	0.428861	0.535939	0.761453	0.64228	0.703619	0.268195	0.701776	0.610458	0.508729	0.493411	0.364859	0.633102
GSE65858_GSM1607867	0.161697	0.502398	0.676719	0.657935	0.74374	0.725584	0.322729	0.597619	0.330086	0.75057	0.636079	0.387036	0.525984	0.787949	0.445238	0.693798	0.387174	0.7728	0.488794	0.556549	0.504912	0.439877	0.517378
GSE65858_GSM1607868	0.265423	0.644384	0.759433	0.67526	0.735958	0.772031	0.339769	0.632759	0.396047	0.803648	0.787865	0.489116	0.583883	0.821516	0.55521	0.73749	0.314005	0.807029	0.59189	0.543844	0.602199	0.403555	0.569544
GSE65858_GSM1607869	0.195781	0.561864	0.529168	0.660616	0.736134	0.73033	0.259049	0.678057	0.379893	0.760171	0.678947	0.392981	0.491508	0.777819	0.583177	0.708376	0.438053	0.764299	0.550773	0.551849	0.537731	0.387452	0.5734
GSE65858_GSM1607870	0.267734	0.674135	0.687756	0.660778	0.709421	0.755444	0.307168	0.646233	0.446127	0.757571	0.777555	0.452853	0.546582	0.784462	0.534831	0.745321	0.310637	0.752483	0.551922	0.58935	0.555725	0.477591	0.52315
GSE65858_GSM1607871	0.634534	0.838425	0.925159	0.720434	0.738274	0.699198	0.444902	0.715528	0.700038	0.732695	0.958886	0.584156	0.672167	0.805685	0.58946	0.773046	0.289115	0.828332	0.775688	0.656847	0.672672	0.418945	0.582097
GSE65858_GSM1607872	0.168223	0.546909	0.605361	0.735585	0.757103	0.73581	0.256676	0.713532	0.30717	0.767623	0.741893	0.459173	0.443873	0.786625	0.616779	0.713743	0.517629	0.764856	0.637438	0.512524	0.550841	0.387309	0.567291
GSE65858_GSM1607873	0.28038	0.641508	0.62291	0.618947	0.689681	0.709021	0.359835	0.616952	0.34822	0.795784	0.65618	0.382647	0.582155	0.751241	0.507043	0.687616	0.379116	0.757504	0.479866	0.522267	0.531909	0.42381	0.567633
GSE65858_GSM1607874	0.109843	0.550249	0.557512	0.643604	0.746502	0.71708	0.29287	0.655263	0.286554	0.785992	0.627878	0.398893	0.538759	0.750902	0.503804	0.683781	0.552532	0.763934	0.488493	0.543655	0.473398	0.458953	0.584677
GSE65858_GSM1607875	0.122105	0.613884	0.508486	0.658365	0.719591	0.747327	0.190592	0.659221	0.267969	0.729315	0.644337	0.431722	0.430167	0.762603	0.550285	0.685604	0.578353	0.724755	0.535913	0.496158	0.500402	0.447553	0.554312
GSE65858_GSM1607876	0.0973976	0.644662	0.544595	0.672001	0.702376	0.700447	0.336336	0.579903	0.287259	0.773046	0.615429	0.380113	0.392342	0.773655	0.520493	0.672768	0.351709	0.719299	0.469072	0.503139	0.488252	0.47702	0.560972
GSE65858_GSM1607877	0.456412	0.708321	0.687741	0.654053	0.702559	0.760213	0.342864	0.636672	0.528729	0.78775	0.798185	0.433956	0.588868	0.786104	0.568466	0.726124	0.365942	0.781576	0.573528	0.531064	0.562531	0.404227	0.472742
GSE65858_GSM1607878	0.280102	0.604279	0.849348	0.691436	0.7621	0.709733	0.327975	0.675751	0.463425	0.79231	0.890563	0.486772	0.563943	0.824622	0.63303	0.797903	0.247447	0.767122	0.687271	0.562992	0.613897	0.384113	0.541259
GSE65858_GSM1607879	0.162676	0.686862	0.770519	0.700419	0.727602	0.693325	0.302828	0.661466	0.436408	0.76786	0.813671	0.517124	0.548473	0.753705	0.610344	0.761597	0.203131	0.732849	0.649159	0.565123	0.58968	0.421929	0.626873
GSE65858_GSM1607880	0.33111	0.649622	0.577899	0.682341	0.712822	0.739881	0.360788	0.646519	0.375068	0.817182	0.721705	0.422363	0.565953	0.774537	0.562539	0.758902	0.308355	0.793855	0.55621	0.594251	0.587613	0.351205	0.531697
GSE65858_GSM1607881	0.202678	0.51005	0.61877	0.642124	0.741427	0.753691	0.285305	0.731736	0.37154	0.738046	0.729473	0.449499	0.498485	0.777513	0.557773	0.730227	0.564522	0.779059	0.598992	0.597389	0.546633	0.420533	0.514355
GSE65858_GSM1607882	0.254173	0.577684	0.627151	0.660031	0.735324	0.746443	0.33833	0.650089	0.421627	0.754491	0.688385	0.4432	0.559702	0.768535	0.526591	0.711693	0.467254	0.796442	0.5219	0.571236	0.539717	0.413391	0.520825
GSE65858_GSM1607883	0.0928768	0.475041	0.540071	0.661652	0.726577	0.757562	0.424273	0.648593	0.348017	0.709094	0.672278	0.429544	0.48717	0.784639	0.557354	0.769552	0.332112	0.767509	0.669191	0.568691	0.522596	0.357238	0.514008
GSE65858_GSM1607884	0.0643821	0.546848	0.485822	0.65923	0.705978	0.720777	0.32943	0.642246	0.263531	0.73696	0.613361	0.364089	0.578263	0.780495	0.487138	0.719424	0.258938	0.704087	0.468268	0.530181	0.481778	0.390127	0.596664
GSE65858_GSM1607885	0.108437	0.532062	0.568076	0.681683	0.714421	0.753519	0.342226	0.676684	0.297633	0.773729	0.669832	0.406752	0.557502	0.804001	0.527319	0.702794	0.533008	0.767881	0.601589	0.598945	0.534686	0.424017	0.50761
GSE65858_GSM1607886	0.104204	0.53736	0.479242	0.631132	0.718816	0.755795	0.243784	0.70675	0.222308	0.709303	0.535566	0.3198	0.400742	0.779233	0.494497	0.671401	0.372531	0.704029	0.447812	0.491183	0.487992	0.347596	0.505749
GSE65858_GSM1607887	0.316983	0.725805	0.868417	0.694034	0.769675	0.738595	0.327329	0.688914	0.487791	0.751891	0.901227	0.541985	0.511331	0.797211	0.583394	0.798689	0.153801	0.750468	0.712552	0.622486	0.629968	0.484449	0.552752
GSE65858_GSM1607888	0.081358	0.493632	0.54006	0.671283	0.702565	0.767738	0.298293	0.607254	0.269384	0.75069	0.651031	0.381457	0.487147	0.76992	0.487544	0.678477	0.381602	0.809019	0.512395	0.570173	0.505478	0.417419	0.476794
GSE65858_GSM1607889	0.150725	0.531256	0.539214	0.700111	0.676886	0.744192	0.367409	0.705829	0.318197	0.849424	0.724043	0.522606	0.712751	0.788336	0.538559	0.747117	0.450274	0.804571	0.668	0.637604	0.585795	0.397201	0.538014
GSE65858_GSM1607890	0.163016	0.556126	0.581538	0.705746	0.751355	0.700112	0.40369	0.662588	0.299204	0.801038	0.688092	0.406922	0.561699	0.765716	0.559933	0.724177	0.694686	0.77888	0.600389	0.564216	0.518147	0.466956	0.519428
GSE65858_GSM1607891	0.592843	0.696898	0.888838	0.705776	0.721702	0.732419	0.321279	0.71037	0.6783	0.751187	0.915304	0.564314	0.565205	0.862842	0.613542	0.776986	0.360204	0.835479	0.73852	0.655971	0.624652	0.393258	0.520302
GSE65858_GSM1607892	0.260327	0.645666	0.732952	0.661603	0.734623	0.768223	0.331036	0.66314	0.471691	0.768556	0.724722	0.448369	0.54076	0.775755	0.575935	0.745381	0.395098	0.74942	0.563059	0.55319	0.542718	0.381894	0.534259
GSE65858_GSM1607893	0.329545	0.669148	0.781064	0.676637	0.76625	0.760175	0.382256	0.648357	0.459497	0.765639	0.774973	0.4278	0.575692	0.805346	0.528757	0.719058	0.386315	0.741274	0.535277	0.568943	0.589685	0.444845	0.619329
GSE65858_GSM1607894	0.252194	0.690388	0.586508	0.678668	0.701019	0.756505	0.395126	0.64724	0.42012	0.760968	0.765392	0.50404	0.625718	0.825731	0.593766	0.733498	0.417751	0.80225	0.645883	0.602704	0.594812	0.427698	0.528349
GSE65858_GSM1607895	0.173186	0.612111	0.625504	0.710259	0.736813	0.757556	0.269958	0.686159	0.36154	0.744899	0.679597	0.410016	0.457005	0.762994	0.534316	0.680601	0.384106	0.730377	0.558132	0.508178	0.523484	0.391661	0.533672
GSE65858_GSM1607896	0.12259	0.587413	0.73356	0.700519	0.733729	0.753437	0.327961	0.651668	0.378027	0.741879	0.748966	0.442694	0.460938	0.797984	0.583394	0.753998	0.382527	0.746564	0.587859	0.516331	0.557819	0.375582	0.594765
GSE65858_GSM1607897	0.29364	0.747896	0.737187	0.738023	0.736018	0.753636	0.424737	0.687214	0.457906	0.800096	0.834462	0.481362	0.645042	0.798178	0.560852	0.706359	0.474471	0.790366	0.649296	0.540576	0.561576	0.378149	0.56819
GSE65858_GSM1607898	0.119139	0.52875	0.585764	0.664201	0.746691	0.701783	0.246579	0.643965	0.315874	0.759045	0.649866	0.415799	0.46657	0.786644	0.56745	0.718758	0.391569	0.765958	0.569938	0.53374	0.514659	0.384708	0.546088
GSE65858_GSM1607899	0.178605	0.477929	0.636235	0.666405	0.704102	0.746208	0.328516	0.610066	0.297707	0.799569	0.624136	0.44039	0.540332	0.776243	0.45139	0.685125	0.406127	0.771038	0.476441	0.562526	0.484242	0.418642	0.495075
GSE65858_GSM1607900	0.208828	0.671633	0.844485	0.687339	0.727628	0.76412	0.347227	0.640545	0.431726	0.702663	0.769316	0.45281	0.467339	0.822517	0.565486	0.695414	0.206861	0.700304	0.547797	0.538289	0.568113	0.408051	0.574231
GSE65858_GSM1607901	0.425464	0.610303	0.709458	0.664242	0.744441	0.720195	0.379168	0.723727	0.50322	0.753011	0.798375	0.442389	0.673724	0.806953	0.6155	0.795504	0.273651	0.800072	0.708397	0.611229	0.636868	0.374761	0.529004
GSE65858_GSM1607902	0.192198	0.711076	0.794131	0.714726	0.73352	0.739582	0.326723	0.697184	0.44734	0.741952	0.877025	0.533975	0.521309	0.83541	0.573511	0.761158	0.448321	0.792451	0.63185	0.609967	0.588109	0.502808	0.516112
GSE65858_GSM1607903	0.0898551	0.573255	0.557681	0.604136	0.716633	0.773363	0.268628	0.656153	0.285159	0.763111	0.624205	0.348271	0.40354	0.754675	0.540548	0.713699	0.40617	0.724239	0.493117	0.505431	0.517797	0.478155	0.572447
GSE65858_GSM1607904	0.140557	0.442804	0.491643	0.675847	0.69542	0.811905	0.378417	0.703061	0.381413	0.825693	0.712257	0.504141	0.671099	0.772744	0.611857	0.72792	0.569639	0.813323	0.651392	0.633673	0.578113	0.378686	0.546428
GSE65858_GSM1607905	0.61746	0.713109	0.728097	0.639961	0.716736	0.732996	0.298447	0.632259	0.581655	0.795324	0.827929	0.427328	0.474988	0.790311	0.493263	0.683032	0.312347	0.796001	0.548181	0.585701	0.588647	0.369009	0.530904
GSE65858_GSM1607906	0.0796757	0.599925	0.528917	0.661944	0.752447	0.716328	0.322232	0.653372	0.266503	0.729061	0.61092	0.380251	0.542436	0.742731	0.573143	0.732984	0.375053	0.723396	0.531579	0.512667	0.520653	0.402166	0.588039
GSE65858_GSM1607907	0.259926	0.55777	0.803841	0.700386	0.784696	0.780217	0.305324	0.725028	0.490951	0.823955	0.923468	0.607432	0.663366	0.853014	0.665421	0.827437	0.344835	0.783026	0.787749	0.655949	0.638999	0.391543	0.518535
GSE65858_GSM1607908	0.14077	0.512634	0.467507	0.674295	0.698158	0.722729	0.269114	0.657531	0.218043	0.727194	0.562728	0.34327	0.465604	0.747409	0.500868	0.671842	0.455471	0.754407	0.460374	0.52602	0.474736	0.394314	0.529008
GSE65858_GSM1607909	0.209874	0.59166	0.676362	0.671346	0.709973	0.710798	0.209776	0.662452	0.308196	0.777338	0.681367	0.393368	0.467095	0.814908	0.557049	0.74612	0.200002	0.731085	0.580342	0.523586	0.545693	0.319539	0.539019
GSE65858_GSM1607910	0.148051	0.806983	0.741168	0.696994	0.750257	0.689932	0.36131	0.675271	0.382494	0.782472	0.722962	0.410385	0.565376	0.746696	0.555786	0.698351	0.473298	0.777233	0.69244	0.591023	0.598301	0.433834	0.594513
GSE65858_GSM1607911	0.142673	0.505384	0.506699	0.593936	0.697486	0.734528	0.315466	0.58839	0.224039	0.766261	0.558085	0.343636	0.467562	0.75483	0.531865	0.697156	0.1302	0.731574	0.448059	0.528749	0.476969	0.291901	0.585981
GSE65858_GSM1607912	0.20162	0.648717	0.606149	0.670475	0.749924	0.737962	0.323933	0.67467	0.366395	0.742531	0.725422	0.45187	0.510547	0.772142	0.539169	0.723122	0.419266	0.759792	0.55852	0.550575	0.531214	0.369615	0.618318
GSE65858_GSM1607913	0.151317	0.563665	0.613766	0.685508	0.722583	0.743662	0.325156	0.670441	0.33727	0.745264	0.735728	0.400411	0.522639	0.813072	0.583032	0.742498	0.441339	0.785655	0.650342	0.560498	0.573013	0.411442	0.512646
GSE65858_GSM1607914	0.164525	0.48492	0.630375	0.656557	0.740713	0.839603	0.35302	0.683948	0.377223	0.789253	0.734345	0.52772	0.537749	0.812756	0.57932	0.782415	0.285757	0.782046	0.632975	0.615558	0.57782	0.383419	0.510157
GSE65858_GSM1607915	0.422238	0.731021	0.791162	0.752544	0.727227	0.707806	0.426658	0.698934	0.604024	0.76535	0.965409	0.575534	0.690311	0.805104	0.600071	0.783566	0.43143	0.818416	0.777551	0.630281	0.6488	0.483565	0.569813
GSE65858_GSM1607916	0.144812	0.550512	0.654084	0.695632	0.736999	0.754953	0.298794	0.662391	0.3401	0.814834	0.628613	0.40871	0.57805	0.77012	0.478614	0.703728	0.600422	0.763072	0.53466	0.531969	0.528189	0.383694	0.582581
GSE65858_GSM1607917	0.072116	0.570109	0.557976	0.650444	0.724115	0.748209	0.295764	0.613737	0.266108	0.794294	0.591441	0.431898	0.631081	0.781237	0.477169	0.649754	0.236511	0.72463	0.532044	0.519004	0.487201	0.375177	0.545792
GSE65858_GSM1607918	0.826199	0.798389	0.894702	0.696002	0.704058	0.719163	0.459093	0.71744	0.823782	0.714064	0.97018	0.549111	0.709779	0.867846	0.625741	0.715474	0.226157	0.824848	0.719789	0.681492	0.662422	0.379067	0.505125
GSE65858_GSM1607919	0.150704	0.607883	0.562711	0.663856	0.76177	0.729547	0.285178	0.649814	0.324446	0.831261	0.687577	0.403264	0.563688	0.783881	0.533363	0.746897	0.355485	0.785682	0.594348	0.505907	0.565635	0.430924	0.573913
GSE65858_GSM1607920	0.120664	0.543005	0.675664	0.683612	0.749799	0.744252	0.269624	0.674468	0.378934	0.75	0.728013	0.440223	0.558633	0.826959	0.563763	0.712564	0.517922	0.764708	0.591767	0.552776	0.537597	0.401964	0.566294
GSE65858_GSM1607921	0.119364	0.494705	0.490698	0.647876	0.742541	0.759675	0.258629	0.644349	0.231064	0.742586	0.588805	0.362178	0.410089	0.762949	0.521564	0.658851	0.426186	0.755552	0.501954	0.509263	0.505387	0.374246	0.508455
GSE65858_GSM1607922	0.109282	0.596678	0.648023	0.656965	0.678005	0.750481	0.358954	0.648216	0.312341	0.75589	0.671671	0.406466	0.491217	0.756025	0.543457	0.678615	0.443587	0.738246	0.548127	0.537229	0.519716	0.401238	0.525417
GSE65858_GSM1607923	0.168792	0.677247	0.76884	0.700223	0.713111	0.744175	0.376157	0.65097	0.449117	0.741083	0.824832	0.470278	0.481448	0.789633	0.570993	0.772141	0.523154	0.783608	0.564177	0.597714	0.561704	0.493435	0.576367
GSE65858_GSM1607924	0.113779	0.452792	0.519848	0.717036	0.702292	0.750417	0.393404	0.684551	0.327781	0.769167	0.632628	0.3675	0.439533	0.780389	0.523481	0.666124	0.508435	0.740616	0.558139	0.539203	0.508513	0.409635	0.556525
GSE65858_GSM1607925	0.0735161	0.596821	0.53422	0.609937	0.728839	0.780166	0.305824	0.672886	0.305159	0.719163	0.643677	0.423448	0.593141	0.745276	0.529654	0.685336	0.326411	0.74644	0.550575	0.515406	0.497184	0.411837	0.637768
GSE65858_GSM1607926	0.102364	0.669947	0.58783	0.747477	0.751444	0.764792	0.512971	0.770201	0.410508	0.789764	0.798878	0.596777	0.756491	0.785498	0.642416	0.774043	0.441644	0.792299	0.778556	0.63008	0.638022	0.413752	0.631299
GSE65858_GSM1607927	0.450804	0.803297	0.899475	0.750902	0.73582	0.689308	0.455461	0.640977	0.646066	0.75622	0.95579	0.600771	0.770094	0.812192	0.670534	0.745804	0.279325	0.809973	0.777378	0.618845	0.622912	0.448197	0.562843
GSE65858_GSM1607928	0.171559	0.576652	0.64807	0.711099	0.701936	0.732032	0.310141	0.674014	0.328854	0.781823	0.690036	0.363232	0.481057	0.787447	0.524839	0.713762	0.470485	0.741233	0.522878	0.539567	0.535042	0.399218	0.533482
GSE65858_GSM1607929	0.802866	0.821514	0.813985	0.705725	0.715485	0.703714	0.391986	0.671061	0.796594	0.74867	0.931851	0.47208	0.492557	0.844028	0.55184	0.754096	0.296085	0.82706	0.659575	0.690213	0.626112	0.39394	0.479149
GSE65858_GSM1607930	0.239007	0.555873	0.664415	0.687076	0.709085	0.771362	0.388832	0.629781	0.370474	0.786677	0.715029	0.427699	0.552767	0.779686	0.469792	0.70864	0.51133	0.801064	0.51344	0.576085	0.52401	0.402133	0.47261
GSE65858_GSM1607931	0.116267	0.551937	0.523977	0.612465	0.753441	0.738772	0.193078	0.65774	0.271059	0.707939	0.582281	0.388724	0.448695	0.765093	0.500516	0.731258	0.359467	0.720517	0.555343	0.513216	0.523396	0.355739	0.592882
GSE65858_GSM1607932	0.200729	0.553369	0.692724	0.675941	0.746788	0.738415	0.282449	0.739018	0.349582	0.753305	0.782433	0.525344	0.572801	0.821867	0.631549	0.806797	0.470082	0.793303	0.702993	0.593974	0.626167	0.403031	0.508527
GSE65858_GSM1607933	0.328719	0.657853	0.705227	0.615356	0.69682	0.737219	0.303527	0.621344	0.397258	0.833517	0.735277	0.398303	0.468016	0.812725	0.528454	0.673488	0.305134	0.739919	0.511497	0.539913	0.585442	0.412501	0.570795
GSE65858_GSM1607934	0.107834	0.543798	0.627369	0.663076	0.757988	0.76663	0.33245	0.638267	0.354541	0.776979	0.681236	0.387877	0.388018	0.799057	0.548678	0.646356	0.33884	0.757493	0.600364	0.522513	0.526161	0.406374	0.503907
GSE65858_GSM1607935	0.776215	0.721082	0.877802	0.729687	0.734699	0.712879	0.496501	0.711423	0.774141	0.786426	1	0.539129	0.682454	0.867523	0.641493	0.77599	0.394201	0.843338	0.712563	0.69985	0.685595	0.404787	0.525448
GSE65858_GSM1607936	0.233742	0.567218	0.715239	0.694742	0.709765	0.761385	0.280452	0.63751	0.410113	0.802006	0.703364	0.452134	0.540165	0.795773	0.518375	0.727752	0.604278	0.795297	0.532442	0.57114	0.545596	0.448976	0.532242
GSE65858_GSM1607937	0.143152	0.526727	0.518622	0.593455	0.747336	0.742564	0.279869	0.603493	0.232696	0.746875	0.562998	0.370233	0.520659	0.756729	0.543453	0.689851	0.193781	0.711757	0.434589	0.493274	0.489377	0.275551	0.565204
GSE65858_GSM1607938	0.264135	0.669608	0.651387	0.660559	0.757703	0.746437	0.475363	0.746439	0.464605	0.793503	0.767413	0.438845	0.713214	0.773135	0.58525	0.746946	0.341278	0.781717	0.646735	0.61037	0.581167	0.41279	0.569969
GSE65858_GSM1607939	0.128728	0.673441	0.602627	0.707463	0.725105	0.742718	0.386639	0.664176	0.323339	0.730891	0.697101	0.514552	0.603123	0.765526	0.578859	0.767755	0.404174	0.73202	0.559085	0.616715	0.540875	0.36372	0.653781
GSE65858_GSM1607940	0.0718704	0.564645	0.653728	0.656524	0.725439	0.787988	0.386644	0.631989	0.348672	0.693268	0.662966	0.413889	0.58817	0.754075	0.533709	0.732352	0.4189	0.754606	0.571951	0.509302	0.519631	0.438431	0.542773
GSE65858_GSM1607941	0.247028	0.709571	0.714383	0.706847	0.718642	0.767657	0.387849	0.622551	0.424426	0.752738	0.763259	0.431641	0.469553	0.772459	0.55552	0.736675	0.287728	0.746193	0.609173	0.519733	0.556287	0.458754	0.551069
GSE65858_GSM1607942	0.125609	0.571675	0.567349	0.690846	0.737216	0.743341	0.258886	0.730841	0.311941	0.755798	0.703662	0.39426	0.474473	0.785669	0.62074	0.711582	0.434469	0.767809	0.638259	0.544763	0.568587	0.436565	0.544347
GSE65858_GSM1607943	0.168183	0.512155	0.494242	0.629188	0.671956	0.747244	0.274912	0.67712	0.288432	0.725377	0.64845	0.3939	0.527687	0.809806	0.454765	0.704737	0.285036	0.77152	0.511848	0.521385	0.466474	0.438464	0.480899
GSE65858_GSM1607944	0.200365	0.629563	0.663155	0.587619	0.737364	0.733886	0.348841	0.628728	0.349146	0.779494	0.706085	0.40511	0.523284	0.762464	0.513317	0.718415	0.333634	0.732194	0.542604	0.54268	0.576517	0.403408	0.622009
GSE65858_GSM1607945	0.16832	0.629918	0.647366	0.660222	0.741704	0.751826	0.328996	0.667321	0.393605	0.760141	0.731353	0.452158	0.539655	0.798673	0.606412	0.723725	0.41273	0.756901	0.641222	0.555181	0.552382	0.365111	0.607747
GSE65858_GSM1607946	0.0990576	0.543747	0.555376	0.660338	0.713725	0.780265	0.362042	0.664658	0.281564	0.75394	0.641385	0.381103	0.483306	0.759412	0.555134	0.679722	0.444514	0.760261	0.489422	0.536455	0.506883	0.397619	0.53727
GSE65858_GSM1607947	0.684843	0.692989	0.883485	0.682831	0.716691	0.704824	0.410485	0.643146	0.698816	0.813887	0.939975	0.443596	0.617486	0.825576	0.564448	0.76192	0.284766	0.822052	0.664052	0.633077	0.650455	0.439692	0.483814
GSE65858_GSM1607948	0.4532	0.777979	0.816523	0.786998	0.717143	0.749915	0.43414	0.712672	0.650958	0.774697	0.973302	0.619878	0.724668	0.808446	0.603148	0.788811	0.382852	0.848194	0.778781	0.61645	0.619676	0.452296	0.515683
GSE65858_GSM1607949	0.147904	0.567485	0.57848	0.635677	0.72177	0.732624	0.372382	0.625512	0.288056	0.775462	0.681772	0.48342	0.606389	0.780551	0.549663	0.715808	0.418005	0.761147	0.580629	0.567392	0.530943	0.375922	0.608855
GSE65858_GSM1607950	0.18691	0.521059	0.562029	0.644495	0.704176	0.745328	0.3642	0.715718	0.300395	0.790314	0.667651	0.397846	0.613566	0.756174	0.5255	0.704087	0.620293	0.780112	0.586941	0.567984	0.531688	0.410268	0.552168
GSE65858_GSM1607951	0.183584	0.612359	0.719292	0.676727	0.737875	0.752389	0.302421	0.612684	0.383403	0.729468	0.687269	0.416334	0.352254	0.818711	0.49552	0.707961	0.221466	0.726428	0.460995	0.513303	0.529158	0.383574	0.478992
GSE65858_GSM1607952	0.164755	0.705464	0.689945	0.723652	0.76719	0.650608	0.389925	0.690566	0.37789	0.722515	0.773206	0.477239	0.618179	0.72972	0.596738	0.747378	0.291358	0.763817	0.696188	0.568051	0.620482	0.425268	0.628034
GSE65858_GSM1607953	0.0886539	0.535684	0.54802	0.689982	0.719459	0.74851	0.361791	0.655828	0.292778	0.786343	0.684262	0.431691	0.614342	0.781204	0.5692	0.765898	0.530091	0.813393	0.58483	0.572682	0.549845	0.42432	0.545642
