# Supplementary material for: T cell proliferation-related subtypes, prognosis model and characterization of tumor microenvironment in head and neck squamous cell carcinoma
Source: Research Square preprint supplement (doi:10.21203/rs.3.rs-2684988/v1), 2023-03-17
Supplement: Supplementary file 7 [file af113637aed04dc03209700a.xlsx]

## Sheet: Sheet1
Table S2: Summary of 33 recognized T cell proliferation-related genes
IFNL2	driver of T cell proliferation
LTBR	driver of T cell proliferation
IL1RN	driver of T cell proliferation
CXCL12	driver of T cell proliferation
CRLF2	driver of T cell proliferation
IL12B	driver of T cell proliferation
NFYB	driver of T cell proliferation
BATF	driver of T cell proliferation
FOSB	driver of T cell proliferation
ATF6B	driver of T cell proliferation
AHNAK	driver of T cell proliferation
SLC10A7	driver of T cell proliferation
CALML3	driver of T cell proliferation
CLIC1	driver of T cell proliferation
RAN	driver of T cell proliferation
CDK2	driver of T cell proliferation
MS4A3	driver of T cell proliferation
CDK1	driver of T cell proliferation
DBI	driver of T cell proliferation
CYP27A1	driver of T cell proliferation
AKR1C4	driver of T cell proliferation
DUPD1	driver of T cell proliferation
GPD1	driver of T cell proliferation
GPN3	driver of T cell proliferation
AHCY	driver of T cell proliferation
ADA	driver of T cell proliferation
ITM2A	driver of T cell proliferation
HOMER1	driver of T cell proliferation
MRPL18	driver of T cell proliferation
MRPL51	driver of T cell proliferation
LIG3	driver of T cell proliferation
ZNF830	driver of T cell proliferation
DCLRE1B	driver of T cell proliferation
