# Supplementary material for: T cell proliferation-related subtypes, prognosis model and characterization of tumor microenvironment in head and neck squamous cell carcinoma
Source: Research Square preprint supplement (doi:10.21203/rs.3.rs-2684988/v1), 2023-03-17
Supplement: Supplementary file 8 [file d3ae6f4883ec3d063e9d5ec9.xlsx]

## Sheet: Sheet1
Table S3: The prognostic values of TRGs in patients with HNSC.
id	HR	HR.95L	HR.95H	pvalue	km
LTBR	1.24081	1.02295	1.50508	0.0285055	0.00267245
IL1RN	0.965438	0.880958	1.05802	0.45155	0.0744831
CXCL12	0.984423	0.898199	1.07892	0.737095	0.255392
NFYB	1.08027	0.866723	1.34644	0.492012	0.102602
BATF	0.83634	0.744021	0.940115	0.00274674	0.000825572
FOSB	1.00685	0.939822	1.07866	0.845969	0.0671005
ATF6B	1.11726	0.905929	1.37788	0.299991	0.0596732
AHNAK	0.999765	0.87216	1.14604	0.997309	0.0561877
SLC10A7	0.861027	0.676836	1.09534	0.223067	0.0134347
CALML3	0.87568	0.794328	0.965363	0.00761771	0.00444243
CLIC1	1.36375	1.04895	1.77302	0.0205127	0.00598982
RAN	1.3154	1.00631	1.71943	0.0448572	0.00334268
CDK2	1.01154	0.84116	1.21644	0.902924	0.0145991
DBI	0.86197	0.712545	1.04273	0.126216	0.014345
CYP27A1	0.902622	0.826621	0.985611	0.0224346	0.0042165
AKR1C4	1.01408	0.862733	1.19197	0.865379	0.0102786
GPD1	1.03939	0.874574	1.23528	0.660939	0.226353
GPN3	1.37805	1.08971	1.74269	0.00742351	0.00135165
AHCY	1.06106	0.897886	1.25389	0.486637	0.153035
ADA	1.39275	1.20498	1.60977	7.34e-06	0.000159317
ITM2A	0.885541	0.791926	0.990223	0.0329805	0.00929832
HOMER1	1.1509	0.964619	1.37315	0.118736	0.0112788
MRPL18	1.10807	0.876657	1.40057	0.390573	0.0966504
MRPL51	1.01504	0.814944	1.26426	0.894001	0.0751401
LIG3	1.08131	0.870762	1.34277	0.479246	0.134314
ZNF830	0.962894	0.754698	1.22853	0.760979	0.236751
DCLRE1B	0.882471	0.730141	1.06658	0.195932	0.00140913
