# Supplementary material for: T cell proliferation-related subtypes, prognosis model and characterization of tumor microenvironment in head and neck squamous cell carcinoma
Source: Research Square preprint supplement (doi:10.21203/rs.3.rs-2684988/v1), 2023-03-17
Supplement: Supplementary file 9 [file d779e8089a1df111edd68298.xlsx]

## Sheet: Sheet1
Table S7: 23 risk genes were screened.
id	coefficient
CCL19	0.281303
ATP2A3	0.586897
CTLA4	-0.496268
ANKRD44	-0.352656
SH3KBP1	0.306463
FGD3	-0.301386
ARL4D	0.54375
CPVL	0.235641
CLEC3B	-0.374095
LIMD2	-0.484347
LPL	0.254548
ULBP2	0.174297
CTSG	-0.184459
`NKX2-3`	-0.338926
DSC3	-0.281297
HOXC13	0.178142
PTPRZ1	-0.16096
SFRP2	0.103464
ODAM	-0.146624
SPINK6	-0.207782
TFF3	-0.187598
IGFL1	0.0876923
CSF2	0.12336
