# Supplementary material for: T cell proliferation-related subtypes, prognosis model and characterization of tumor microenvironment in head and neck squamous cell carcinoma
Source: Research Square preprint supplement (doi:10.21203/rs.3.rs-2684988/v1), 2023-03-17
Supplement: Supplementary file 10 [file e22e07c2ebdcbc2383c0277e.xlsx]

## Sheet: Sheet1
Table S1: Clinical and gene expression information of HNSC patients
id	futime	fustat	Gender	Age	Stage	T	N	TRGcluster	LTBR	IL1RN	CXCL12	NFYB	BATF	FOSB	ATF6B	AHNAK	SLC10A7	CALML3	CLIC1	RAN	CDK2	DBI	CYP27A1	AKR1C4	GPD1	GPN3	AHCY	ADA	ITM2A	HOMER1	MRPL18	MRPL51	LIG3	ZNF830	DCLRE1B
GSM1607684	1100	0	FEMALE	59	III-IV	T2	N2	B	7.01269	6.91485	5.58576	4.77399	8.15502	2.83891	5.90831	7.16916	3.56704	6.44514	9.95422	8.5083	5.60085	8.17625	8.15311	2.14729	2.3938	5.88338	7.4998	6.20158	6.75295	3.67942	7.39412	9.2919	4.10205	5.73249	4.72629
GSM1607685	1835	0	MALE	76	III-IV	T2	N2	B	6.59421	6.83054	4.07083	5.68692	5.0306	6.83647	5.84222	8.04298	3.55528	5.24045	9.00778	8.14619	6.15271	8.56153	7.18212	2.03811	2.94417	6.12064	9.01021	5.28217	5.19675	3.66593	7.28603	8.40541	4.38376	5.85149	5.79669
GSM1607686	2393	1	MALE	64	III-IV	T2	N2	A	6.93145	7.36809	3.45784	5.23873	4.81368	5.56281	5.91172	7.23497	3.39438	6.6392	9.47106	8.32578	4.82251	7.28099	4.4643	3.37563	2.59624	5.08869	8.09841	5.07324	3.93815	4.43377	7.2119	8.16489	4.90592	4.8058	5.08386
GSM1607687	1212	0	MALE	67	III-IV	T2	N2	A	8.0611	7.13585	2.99376	5.17391	4.85535	8.42006	6.81321	8.08545	4.25531	7.88525	10.1487	8.5728	5.98219	9.49752	4.82465	3.82973	2.28785	5.94541	8.34203	5.66111	4.08478	5.10488	8.12082	8.92732	4.15735	5.48703	5.33438
GSM1607688	987	1	FEMALE	79	III-IV	T4	N2	A	6.98595	8.58375	3.95973	4.71587	4.88246	9.11248	6.85207	9.42425	4.68546	7.08377	9.91822	8.46154	6.75054	8.73291	4.04481	3.18391	2.90835	6.07379	7.30264	6.66364	5.56072	4.22378	7.88911	8.21849	4.23517	4.93303	4.84596
GSM1607689	1939	1	FEMALE	46	III-IV	T2	N2	A	8.43569	9.60703	6.65834	5.09495	4.48899	7.88831	6.00205	8.83425	4.02627	8.04015	9.11134	7.84345	5.21132	8.90039	4.45592	2.95352	2.39489	4.85231	8.27386	7.22758	4.70146	4.25156	7.87066	9.68795	5.37634	5.84658	4.48181
GSM1607690	1329	0	MALE	75	III-IV	T2	N1	A	7.82059	7.07969	5.54224	5.86954	5.99461	6.97487	6.02085	7.61477	4.16598	6.4819	9.91177	9.46356	5.85782	8.55238	4.86695	2.39832	3.0133	5.63623	7.14224	5.3361	4.5907	4.25011	7.68898	8.64678	4.29879	5.23996	4.80759
GSM1607691	941	0	MALE	57	III-IV	T2	N1	A	6.86053	6.84775	3.82066	4.41743	3.81627	7.01273	6.99644	8.10086	4.65664	8.03249	10.2487	8.73578	6.89982	9.15641	3.34997	4.70765	2.60559	6.44545	8.87933	6.76691	3.41559	5.16508	7.90849	8.45491	4.07173	5.61569	5.56851
GSM1607692	1234	0	FEMALE	69	III-IV	T4	N2	A	8.45251	7.17596	3.68609	5.0079	4.49059	8.78464	6.44778	7.71713	3.36207	6.62563	9.74119	9.02538	6.147	8.56396	3.90272	4.53721	2.80008	5.54359	8.03575	6.07993	4.19047	4.42857	8.47889	9.37333	4.1398	5.54145	4.10459
GSM1607693	1024	0	MALE	56	I-II	T2	N0	A	7.68958	5.20597	5.77886	4.6673	4.96387	8.38107	6.7162	7.63964	3.80729	4.99341	10.2376	8.56241	5.47239	7.33368	4.78592	2.35729	2.78521	5.23006	7.18932	4.98365	4.87977	4.46285	7.55279	8.31922	3.49006	4.63677	4.69274
GSM1607694	884	0	MALE	50	I-II	T2	N0	B	7.2301	6.00907	6.93418	4.23021	4.61609	7.21907	6.39885	7.77423	4.4189	4.85103	9.86082	7.82003	4.70972	8.22479	6.62592	3.07533	2.9548	5.91638	7.80426	6.13533	6.81887	3.71749	8.53373	8.46973	4.02518	5.02054	3.95567
GSM1607695	1022	0	MALE	49	I-II	T2	N0	B	7.73793	9.71328	5.54048	4.49882	4.4305	8.45351	5.78191	9.23917	4.09216	7.4192	9.5894	8.46154	5.51994	9.29705	5.37846	3.86336	2.26179	5.28473	8.0235	4.54415	6.14596	4.55262	7.59379	7.87925	4.2142	5.61649	4.32543
GSM1607696	1073	1	MALE	59	III-IV	T4	N2	A	7.35802	7.69348	4.39055	5.03361	4.09135	6.50721	6.21134	8.32945	4.48415	6.25554	9.27478	8.7038	5.36692	7.88078	4.33838	2.83952	3.16938	5.68561	7.79227	6.17706	4.03825	5.54164	7.77745	7.66599	4.11332	5.71602	4.16105
GSM1607697	1289	0	MALE	64	III-IV	T4	N0	B	7.26489	6.68732	4.40725	4.81111	7.36607	4.58466	6.48586	7.15568	3.29762	6.88431	10.2002	8.05577	6.43214	7.81927	6.14227	2.35633	2.84823	5.0516	7.62717	7.2023	5.92282	3.97683	7.26659	9.2353	3.80127	4.67787	4.93285
GSM1607698	1066	1	FEMALE	72	III-IV	T3	N0	A	7.96319	7.74269	4.55363	4.79497	4.95429	7.73431	6.50427	8.75699	3.92154	6.671	10.1284	9.22221	5.63148	7.54197	3.54384	2.21826	2.67253	5.57821	8.50142	6.53869	4.53948	4.60812	7.56583	8.62909	4.01108	5.12237	4.87012
GSM1607699	1038	0	FEMALE	63	III-IV	T4	N1	A	8.54054	7.03065	4.48583	4.63445	5.12726	8.92524	6.90042	8.12767	4.16306	8.20803	10.4584	8.68957	5.31263	8.55678	4.31588	4.81964	1.68964	5.10473	8.31117	5.94143	4.42137	4.1594	7.8267	8.94571	4.9309	5.74342	4.57557
GSM1607700	574	1	MALE	54	III-IV	T3	N2	A	7.06933	8.93656	3.4807	5.45089	3.66449	5.15534	6.55213	7.41099	4.073	4.31797	10.7429	8.94943	6.08378	7.53956	3.61187	2.72381	2.28809	5.50049	7.70162	6.84898	3.22856	5.54673	6.65149	7.95069	4.72968	4.7797	5.33837
GSM1607701	2240	1	MALE	64	III-IV	T4	N3	B	6.71933	4.60143	7.79915	5.55428	4.65913	4.26842	5.42833	7.24093	4.52769	4.57585	9.28529	7.63168	4.34758	9.30086	7.95199	2.81401	2.72959	5.79016	6.85564	5.17101	6.90327	3.42495	7.94641	8.41131	5.14795	5.13692	3.86541
GSM1607702	1786	0	MALE	59	I-II	T2	N0	B	6.79285	7.58267	4.40947	6.11019	6.06066	4.34077	6.84198	8.57407	3.33943	6.035	9.50616	8.55613	5.8407	8.28817	6.75415	2.19278	3.44794	6.27858	9.57245	4.81742	5.551	3.60418	7.9269	8.85587	4.10179	5.71327	5.60712
GSM1607703	1822	0	MALE	68	III-IV	T2	N2	A	7.71056	7.66383	3.6231	4.38527	4.18571	7.81074	6.33747	9.18243	3.92097	7.93779	9.79115	8.68642	5.17227	8.65376	4.0837	4.89123	3.56566	4.79497	7.61787	5.35531	3.781	4.40847	8.36251	8.45491	4.79952	5.24648	5.07599
GSM1607704	595	1	FEMALE	70	III-IV	T3	N2	A	7.3209	7.05513	3.87195	6.02721	5.53738	5.28372	6.1787	8.30668	3.96165	7.49403	9.66113	8.18581	6.45738	8.37812	4.11278	3.56225	2.36527	5.47702	7.82287	5.11367	4.23005	4.43297	7.90707	9.35649	3.99192	5.16819	6.07141
GSM1607705	1003	0	MALE	54	III-IV	T3	N3	A	8.55804	7.87915	5.00217	4.2044	4.44074	7.50431	6.27694	8.39388	4.38851	7.00443	9.59419	9.11483	5.73262	8.72222	4.69344	4.2926	3.01082	5.74407	8.4807	5.66856	4.14528	4.44977	7.81273	9.2919	4.40846	4.79832	4.07831
GSM1607706	1058	0	MALE	52	III-IV	T2	N1	B	6.57772	6.54114	5.40206	5.147	5.88225	8.95064	6.14047	7.67906	3.14856	5.28301	9.6561	8.59255	6.17508	8.21056	5.55851	2.5564	2.70703	5.96679	7.71275	6.38176	6.19437	3.75508	8.18519	8.31542	3.53251	5.32184	5.26233
GSM1607707	1149	0	MALE	57	III-IV	T4	N2	A	7.3685	8.39114	3.56345	5.20053	4.4801	3.57075	7.06491	8.80887	4.55205	7.45877	10.6519	8.86889	6.86629	8.82387	5.54184	2.27634	2.33354	6.43647	8.19512	5.12088	4.21138	3.94277	8.43074	9.839	4.36043	5.80613	4.62928
GSM1607708	1249	0	MALE	74	III-IV	T3	N2	A	7.72999	6.89268	5.54963	5.02306	4.8156	5.97849	6.34125	7.26576	4.37354	5.71976	10.6472	8.86022	6.78616	7.72114	3.6581	2.26201	2.2279	5.9991	7.66019	4.96293	4.41768	4.65201	7.47534	8.77166	3.723	5.95427	5.64498
GSM1607709	1435	0	MALE	64	III-IV	T4	N2	B	7.62742	9.71653	9.18505	5.05491	6.01384	9.10346	6.32932	8.16333	3.64627	5.10788	10.022	8.41166	5.4056	7.33494	5.79394	3.46906	1.90915	5.40612	7.32045	6.13613	6.58926	4.17684	7.23493	8.47198	4.04502	4.76443	4.75768
GSM1607710	1254	0	MALE	66	III-IV	T2	N1	A	8.05333	8.39274	4.12666	4.42169	5.17112	7.54291	5.76095	8.88831	4.1954	7.48787	10.1353	9.22624	5.83319	7.88217	3.72113	3.80997	2.18071	5.8987	7.47469	6.63103	4.55106	5.5125	8.14333	8.40346	4.30005	4.81904	5.1568
GSM1607711	1064	0	FEMALE	57	III-IV	T3	N2	B	6.72733	6.01148	4.58114	5.53302	5.94124	8.06728	5.52711	6.8971	3.49758	4.89408	8.67918	8.5083	6.19273	7.89846	8.42392	2.0044	2.04825	5.88977	8.62544	5.194	5.21025	4.51064	7.95015	8.64931	4.55104	5.47707	5.52392
GSM1607712	1724	1	MALE	46	III-IV	T1	N2	A	7.58533	10.1713	4.34183	5.49354	3.43599	7.49557	6.6845	10.5159	4.19621	7.14204	9.46665	7.96204	4.65085	9.51559	4.99911	2.81049	3.48797	5.09771	8.78871	4.18171	5.11547	3.39632	7.59608	8.38138	4.89072	5.48853	3.69937
GSM1607713	1687	0	MALE	57	III-IV	T1	N1	B	6.41538	7.43059	3.41907	4.75519	6.9114	3.64501	5.65739	7.7917	3.662	6.41903	9.86082	8.44543	5.86756	9.08591	4.31937	2.45851	3.29226	5.30226	6.30933	6.93068	4.84731	3.71625	7.0161	9.1403	5.06586	5.4356	5.29201
GSM1607714	473	1	MALE	63	III-IV	T4	N2	A	8.1767	6.73519	3.46775	4.6904	3.85515	3.92085	5.66106	7.08813	3.69463	5.30797	10.5795	8.88072	5.86924	7.46573	3.62447	3.06349	3.09755	5.65479	8.45666	7.02549	2.81758	5.8743	8.10498	8.75507	4.8272	4.81797	5.30613
GSM1607715	1214	1	MALE	68	III-IV	T4	N2	A	7.33438	7.95971	3.56765	4.59468	4.28694	5.58009	7.29894	7.89453	4.33318	8.32276	9.97045	8.74834	6.36674	9.04897	3.62841	3.57759	3.03423	6.03867	7.10456	7.71954	3.76755	4.73555	7.71944	8.40541	4.38228	5.82188	4.80078
GSM1607716	793	1	FEMALE	64	III-IV	T4	N2	B	7.30743	7.28019	4.12564	4.96063	5.28099	7.60575	6.5545	8.3136	3.20523	7.56995	9.82727	7.91884	5.48567	8.51397	6.04454	3.16547	3.33094	5.15969	7.62903	6.07264	5.2422	3.81514	7.19934	8.97016	5.23851	5.55513	4.75182
GSM1607717	968	1	MALE	57	III-IV	T1	N2	A	7.77806	10.3147	4.9413	4.62559	6.18176	8.67489	6.43753	9.47854	3.8953	8.31138	9.69586	7.6534	4.48996	9.05221	3.71178	3.29473	1.6662	4.45915	7.87313	6.06146	4.58879	4.28659	6.90609	8.05787	4.11305	4.93303	3.84953
GSM1607718	947	0	MALE	40	I-II	T2	N0	A	7.09182	6.48534	3.60363	4.18656	3.56598	4.44818	6.27954	6.88999	4.72575	6.32911	10.2336	8.09082	5.24808	8.96646	3.22614	5.36557	3.45436	5.16397	8.98262	6.45449	3.81527	5.36392	8.85323	7.63016	4.49571	5.35135	4.95168
GSM1607719	933	0	FEMALE	52	III-IV	T1	N2	B	6.87948	6.03452	5.93025	5.26988	5.57317	9.33777	6.2834	8.02378	3.69358	6.76334	9.32722	8.14243	6.43181	7.93383	6.87681	2.31421	2.73092	5.57846	7.66667	6.01972	5.38793	3.89738	7.81967	8.33221	4.48466	5.48065	5.09911
GSM1607720	885	0	MALE	60	III-IV	T2	N2	B	7.20854	9.07619	6.66074	5.7295	5.87363	7.81554	6.13124	8.34068	4.00652	6.01925	9.62491	8.30179	5.38633	8.47801	5.16365	2.96279	3.27827	5.3945	7.94789	5.7931	6.50563	3.88165	7.41677	8.12561	3.5996	5.71528	4.05999
GSM1607721	884	0	FEMALE	70	III-IV	T4	N3	B	6.83445	7.00158	3.30953	4.62947	5.65011	7.93623	7.4559	6.82163	4.3822	4.40921	9.79994	8.8396	6.9665	8.69939	8.58523	1.91004	2.56555	6.62572	10.1817	4.40502	4.26218	3.58908	8.72944	8.69053	4.31126	5.92956	6.29313
GSM1607722	937	0	MALE	50	III-IV	T4	N2	A	7.38051	8.63117	4.00092	4.87695	4.39051	7.01444	6.28605	8.70704	3.13084	6.96947	10.3819	9.00141	5.68204	7.92757	3.72382	3.11152	2.14995	5.36128	7.93879	6.91219	4.377	4.2657	7.99977	8.89181	4.45291	5.26164	4.67158
GSM1607723	1098	1	MALE	52	III-IV	T4	N2	A	8.57467	7.20598	4.85566	4.5304	4.46533	5.63915	6.36899	9.62189	4.1198	8.26433	9.32045	9.01561	4.79884	8.42376	3.48115	5.04764	3.36568	4.69118	7.50988	5.89958	3.26603	5.24221	7.14987	8.56996	5.44336	5.50508	4.6753
GSM1607724	1002	1	MALE	71	III-IV	T4	N2	A	8.03723	9.70346	6.1545	5.17798	5.11231	8.8158	6.61286	7.89287	3.78428	7.27619	10.3854	8.2872	6.08116	8.27088	4.96485	2.78615	3.13498	5.04683	8.19182	6.51856	4.37614	5.10046	7.31745	8.00126	3.73759	4.78639	5.21948
GSM1607725	1508	0	FEMALE	53	III-IV	T4	N2	A	7.39744	6.5262	3.10714	5.03804	4.05603	3.25818	6.63123	7.83075	4.34655	6.66019	10.3935	8.44105	5.20409	8.38644	4.05036	4.18708	2.23409	5.51636	7.2492	6.30299	3.67539	5.09721	8.57513	9.6584	4.20918	4.74069	5.18136
GSM1607726	1191	1	MALE	58	III-IV	T3	N2	B	6.65614	7.71508	7.19442	4.51846	6.47323	8.38806	6.48774	7.65267	3.82566	6.05511	9.67492	8.04538	5.22967	7.81776	4.36899	2.65711	1.79278	5.27944	7.59708	6.62843	6.90068	3.53832	7.57853	8.3854	3.89	5.62395	4.35493
GSM1607727	1137	0	MALE	47	III-IV	T3	N2	B	7.62922	7.03168	6.85887	4.6594	5.68944	5.80007	6.16938	7.90068	3.49758	7.90042	10.0946	8.32641	5.52419	9.03621	5.65262	4.23595	3.44741	5.94971	7.94027	6.42775	5.82719	3.55108	7.8497	8.88925	4.37432	5.18087	3.73023
GSM1607728	1281	1	MALE	59	III-IV	T2	N3	A	7.80861	8.67625	5.00955	4.36583	3.77731	4.80852	5.66237	9.49628	4.22962	7.97629	9.74916	8.68322	5.33389	10.066	5.44525	4.50663	2.65982	5.46697	7.72104	5.00877	5.11726	4.53928	7.87305	8.85346	4.87105	5.43345	4.4552
GSM1607729	753	1	MALE	58	III-IV	T4	N2	A	7.91307	7.11798	5.46716	4.81386	4.66076	8.12656	5.91111	8.84904	4.57658	7.35859	9.99916	8.35072	5.35515	8.15358	4.92014	3.43195	2.56017	5.61987	8.29723	5.23705	5.23072	4.36694	7.28967	8.09469	4.14975	4.65242	4.06507
GSM1607730	1052	0	MALE	51	III-IV	T3	N0	A	7.76349	6.4686	4.4228	4.87527	4.62502	7.95235	6.76025	7.71359	4.56864	7.34282	10.4883	8.56968	6.59568	8.07437	3.74871	3.16594	3.45862	5.77938	8.41719	6.40738	4.83955	4.60015	8.40386	9.11402	3.85609	5.1705	4.35919
GSM1607731	1150	1	MALE	48	III-IV	T3	N0	A	7.5093	8.32301	3.36522	4.38177	3.78359	6.3781	6.85754	8.83425	5.12878	8.11292	9.75485	8.67249	4.95266	9.53272	3.2074	5.35282	3.01748	4.97122	8.19009	5.66856	4.07477	6.03321	7.71168	8.26457	4.7625	5.48853	5.00775
GSM1607732	1270	1	MALE	49	III-IV	T1	N2	A	7.77705	7.17596	4.34729	4.89396	3.83456	8.18056	6.06256	9.80097	4.54832	6.28427	9.04278	9.04619	6.01135	8.04619	4.67781	2.77868	2.41664	6.17245	7.47469	6.25939	4.15879	4.92646	7.77393	8.72189	4.32395	5.67066	5.45837
GSM1607733	2029	0	MALE	69	I-II	T2	N0	B	7.06933	7.33979	5.76597	5.10113	7.17267	5.17488	6.11914	8.24876	3.79772	6.90957	9.73856	8.31182	5.01842	8.44935	4.2256	2.96126	1.59001	5.11801	7.92018	6.17822	5.21114	3.79583	7.30693	8.69724	5.04431	4.88973	5.46223
GSM1607734	267	1	MALE	60	III-IV	T4	N2	B	6.88879	8.56168	6.33088	6.10562	4.91261	6.01706	5.33131	7.25392	3.24306	3.28866	9.58693	8.05577	5.0844	7.42984	6.28622	2.67391	3.93359	5.66015	6.88164	7.45655	4.35252	3.51478	7.39504	8.09469	3.73401	6.00817	4.7153
GSM1607735	1219	0	MALE	51	III-IV	T3	N2	A	9.07135	6.51095	3.44997	4.61612	4.24102	9.16921	5.98869	8.37404	4.37257	8.12936	9.3812	8.60794	6.35248	8.95057	4.04481	2.24112	2.35846	5.60429	8.62331	4.12364	3.7333	5.47067	7.86695	9.11957	4.94945	5.59602	4.60387
GSM1607736	1074	0	MALE	65	III-IV	T4	N0	A	7.40762	10.3534	6.02252	4.50064	5.02192	9.98471	6.72338	10.0959	4.22373	7.81911	10.2639	8.36852	5.52151	9.53272	4.46379	3.35056	2.47919	5.32438	7.62254	5.18652	5.37322	4.05587	7.89172	8.45696	4.68227	5.53586	4.22018
GSM1607737	1179	1	FEMALE	78	I-II	T2	N0	A	7.94004	7.93863	3.16657	4.94606	4.25441	5.95921	6.14496	7.40571	3.95866	6.53153	9.50616	8.9271	5.73563	8.60217	4.22413	2.84486	1.85159	5.70368	9.22775	5.01475	4.07477	4.31999	7.13286	8.16489	4.84995	4.94809	4.70378
GSM1607738	1066	1	FEMALE	70	III-IV	T4	N0	B	7.65557	8.43661	4.81576	4.47786	6.70854	8.64498	6.17275	8.11228	3.54411	6.81952	10.0712	7.89646	5.09754	8.07117	5.32705	4.01057	2.16571	4.76549	7.83017	6.20626	6.42957	4.11008	7.72539	8.13813	4.39685	5.40867	3.97993
GSM1607739	1717	0	MALE	54	III-IV	T3	N1	B	7.22818	7.67498	4.48177	5.03312	5.73234	7.22625	6.40993	7.79553	3.83046	7.35859	9.97045	8.18826	5.78034	8.44306	5.93124	4.20256	2.55804	5.20444	7.94929	6.34069	6.25953	4.48765	7.63016	9.52193	3.77011	5.25027	4.68133
GSM1607740	2059	0	MALE	43	III-IV	T2	N1	B	7.25298	8.57627	7.16112	5.21109	5.52758	4.04504	6.64322	8.08367	3.70197	6.34603	10.535	9.08708	5.56038	8.01865	6.09195	3.89108	3.05189	6.24803	8.87425	6.39961	4.89022	4.93876	8.15179	8.23876	3.92706	4.76547	4.1802
GSM1607741	177	1	MALE	68	III-IV	T4	N2	A	6.72946	6.09441	5.18449	4.76949	4.56038	4.57955	5.82528	8.51524	3.97946	6.27638	10.3158	8.60491	4.77237	7.47042	5.39929	2.9112	3.47316	5.32462	7.33612	4.92185	4.3509	4.25555	7.19123	9.26989	4.2434	5.17551	4.55199
GSM1607742	274	1	MALE	69	III-IV	T3	N2	A	7.56763	8.22877	3.69098	3.86334	3.54256	4.28583	6.32522	8.54175	3.10157	6.94815	9.8058	8.83299	4.75541	8.24348	4.94799	4.81479	3.84618	5.67544	8.886	6.19535	2.86397	4.90229	7.1481	9.00804	5.96899	5.61466	3.72865
GSM1607743	1962	1	MALE	54	I-II	T1	N0	A	7.51014	7.48667	4.21632	4.94233	5.40479	4.92027	6.32915	9.73923	4.68546	5.31432	11.1663	8.51121	5.57366	8.20503	5.36664	2.56985	2.5769	5.41183	8.00591	5.13153	4.03872	4.18175	7.84598	9.05998	4.17037	5.11203	5.26078
GSM1607744	2001	0	MALE	57	I-II	T2	N0	B	7.76636	8.20311	5.70207	5.32837	4.91001	5.20984	6.2299	8.50805	4.14733	6.57437	9.73045	8.24669	5.27486	8.36781	6.56839	3.18562	3.41746	5.55247	8.31469	5.56291	4.80091	3.58481	8.09404	8.25199	4.87043	5.94956	4.80019
GSM1607745	1597	0	MALE	51	III-IV	T4	N2	A	7.56343	7.73116	3.86133	5.58398	5.27163	7.03188	7.189	7.42345	4.64161	5.13109	9.95124	8.67562	5.60343	9.08904	4.0962	3.13887	2.80782	5.65859	8.95231	7.49956	4.49212	5.21634	6.99845	8.5182	4.78637	6.06832	5.42415
GSM1607746	945	0	MALE	49	III-IV	T3	N2	A	8.23815	7.32044	3.46288	4.58403	4.05307	7.93623	6.01075	7.97233	3.57535	6.86424	9.54053	8.8396	6.20327	7.98275	3.17701	4.08892	2.57792	4.53777	8.16715	6.76389	3.74493	4.25725	6.81142	8.00299	4.81953	5.13457	3.92202
GSM1607747	974	0	FEMALE	70	III-IV	T4	N0	A	7.69529	9.37438	4.31469	4.61067	4.11141	8.77633	6.1017	8.81903	4.51676	8.29257	9.9481	9.0263	5.76286	9.67825	3.69628	3.53108	2.28555	5.3648	7.93879	5.17373	4.5141	5.57341	7.81038	8.10144	4.16837	5.18405	5.36993
GSM1607748	1002	0	FEMALE	59	III-IV	T1	N2	B	7.77895	5.57632	5.57794	5.50175	6.32726	6.10384	6.50828	7.61052	3.78447	7.60667	9.88488	8.68025	6.56165	7.72863	5.14397	4.42745	2.75459	6.22132	8.91202	6.86982	6.09977	4.64386	7.87793	8.97806	4.54199	5.29446	4.08547
GSM1607749	1016	0	FEMALE	51	III-IV	T2	N2	B	7.87505	9.22032	5.69797	4.15541	6.9126	9.36789	6.17989	7.75004	4.24598	6.87631	10.145	7.71326	6.09187	8.01234	5.11559	3.35496	1.70459	4.83153	7.95392	5.96025	6.2145	4.61823	8.54818	8.52677	4.32453	5.15476	5.19749
GSM1607750	1004	0	MALE	53	III-IV	T4	N2	A	7.476	5.96573	3.73476	5.16768	3.90075	7.84609	6.31112	6.61686	4.76169	5.06655	9.21944	9.16572	6.47933	8.7046	3.88257	3.15785	2.68227	6.46666	8.06774	6.59353	4.81437	4.93088	7.77198	8.4888	4.05327	5.79323	5.30023
GSM1607751	1002	1	MALE	87	III-IV	T4	N2	A	8.14121	9.17544	4.00586	5.13807	5.06034	7.95235	6.11445	8.4835	4.11197	7.11777	9.44803	9.21258	6.10989	8.74107	3.90987	1.70208	2.49223	5.97291	6.53	5.33283	5.65081	4.15088	7.67782	8.10494	3.61716	4.70439	4.7667
GSM1607752	982	0	MALE	57	III-IV	T4	N2	A	6.83229	8.1027	5.19969	4.7374	5.80626	3.85874	8.04193	8.55028	4.14942	7.30582	10.3195	8.34705	5.48081	8.63872	4.67355	4.58369	2.74264	5.334	8.66109	6.26658	4.53218	5.03571	8.1575	9.70337	4.63296	5.40694	4.4552
GSM1607753	961	0	MALE	57	I-II	T2	N0	B	7.00182	10.9416	6.45825	4.40938	5.58827	7.4171	5.72205	8.62187	4.66241	6.70723	9.9608	8.08124	5.78828	8.04136	5.41231	3.00229	2.69834	5.23482	6.49417	6.97585	5.68097	5.0767	7.30834	7.16112	3.29715	4.82732	4.92436
GSM1607754	954	0	MALE	65	I-II	T1	N0	A	7.45923	7.05598	5.11982	4.49955	4.3953	8.40045	6.12102	8.97611	4.49873	7.91547	10.2258	8.89119	5.94721	9.60667	3.77169	3.8656	3.46532	5.65859	7.75733	5.25965	4.86178	4.9693	8.1476	8.76227	4.61265	5.29594	4.26614
GSM1607755	951	1	FEMALE	53	III-IV	T2	N2	A	8.17552	7.6047	4.75772	5.21041	3.71614	8.73629	6.41674	7.92112	4.18304	6.64966	10.5005	8.94766	6.59136	8.8464	4.0454	1.77839	1.6569	6.83771	8.32324	5.58902	4.41552	4.42857	8.29687	9.07368	5.04187	6.31281	4.08868
GSM1607756	944	0	MALE	57	I-II	T2	N0	B	7.42599	9.56727	7.90926	4.77486	6.18002	8.58846	5.86958	8.87416	4.15578	7.04167	9.36144	7.96204	4.982	8.84926	5.13827	3.55921	3.52239	5.0854	8.18503	5.73371	5.72435	4.85174	7.37527	8.38702	3.71399	4.76048	4.05987
GSM1607757	941	0	MALE	67	III-IV	T4	N1	A	7.4882	8.60649	3.83322	4.18963	5.41451	6.98427	6.67096	8.6747	4.41208	7.33759	9.72256	8.63198	5.53515	8.11393	5.0906	2.89766	2.05294	5.28398	7.45546	6.05048	4.48875	4.89421	7.29065	8.17994	4.68662	4.88146	4.90144
GSM1607758	906	1	MALE	48	III-IV	T3	N2	B	6.823	7.09657	4.93701	5.20374	6.28658	6.08566	5.86656	7.43484	3.54813	7.414	9.02742	8.37797	5.01231	8.61916	5.81009	4.73481	2.90012	5.49843	8.14245	6.68073	6.28541	3.56975	7.2766	8.52462	4.11731	5.32233	3.93341
GSM1607759	927	0	MALE	54	III-IV	T2	N2	A	7.78301	8.5853	5.27675	5.44033	4.45798	3.29554	6.5016	9.8766	4.5335	6.98244	9.84896	9.00652	5.56011	8.20158	4.39795	3.3674	2.97485	5.04153	9.09709	5.56082	4.69199	3.80558	8.663	8.65584	4.50793	5.57529	5.23212
GSM1607760	896	0	MALE	61	III-IV	T1	N3	A	7.20267	7.54091	2.94188	4.69057	3.73899	9.60475	7.15357	7.3862	3.59202	5.45112	10.4883	8.62391	6.00077	8.8376	3.13617	5.26051	2.97521	5.73622	7.28171	6.76246	3.09466	3.78111	8.30573	8.2573	4.92444	6.02857	5.30699
GSM1607761	903	1	MALE	40	III-IV	T2	N2	B	7.14888	5.09227	4.94844	5.00006	4.23637	6.7064	6.0053	6.45067	3.58154	3.31984	9.60238	8.84674	6.24565	8.17959	6.24472	2.69669	2.30165	5.65729	8.73326	4.4744	5.16406	4.07543	7.53601	8.69494	4.79659	4.80479	5.12233
GSM1607762	875	0	MALE	59	III-IV	T4	N2	B	7.83661	8.2338	5.1165	5.3746	6.3312	7.76439	6.49967	8.77869	3.68846	6.98244	9.81144	8.62231	5.45931	8.21056	4.81985	3.46247	2.00036	5.21856	7.67376	5.84429	5.30198	4.95033	7.74156	8.60009	4.54747	5.63494	4.87637
GSM1607763	906	0	MALE	77	III-IV	T4	N2	A	7.27197	6.6268	3.31626	4.72744	3.83051	5.87034	7.06706	9.42129	3.80485	6.95234	10.022	9.25928	6.98109	7.6538	3.20667	3.21572	3.40531	6.39655	7.95838	6.08244	3.49529	5.27248	8.12641	8.97016	4.49074	5.04712	5.54819
GSM1607764	1808	1	MALE	68	III-IV	T3	N1	A	8.59933	6.98834	3.49185	5.84845	4.77245	7.06148	6.34267	7.3021	3.40853	7.77869	9.43402	8.25956	5.37542	7.84788	5.09791	2.33463	2.34769	5.26869	7.65352	6.05515	3.49074	3.6697	7.95334	9.50936	4.94017	5.53684	5.36061
GSM1607765	1837	0	MALE	58	III-IV	T2	N2	B	6.92455	6.98678	5.19603	5.70575	6.47751	3.4282	6.12816	7.51802	3.84176	7.15192	10.1115	8.14001	6.48043	7.84203	7.74946	1.95603	3.25676	5.57392	8.44911	4.34016	6.99883	3.57142	6.83732	8.84323	4.31706	6.05494	5.75873
GSM1607766	304	1	MALE	56	III-IV	T4	N2	A	7.48739	7.30325	4.56894	4.55551	4.56468	7.88337	5.73714	8.48244	3.87595	7.0887	9.14965	8.61274	4.95457	8.92038	4.05405	4.62816	2.03554	5.05405	8.25327	6.56124	4.50315	4.42564	8.21892	8.37723	5.17522	4.47477	4.08418
GSM1607767	652	1	MALE	64	III-IV	T3	N2	A	8.59857	7.69545	4.93799	5.03136	4.87625	5.50734	5.70082	8.77537	3.9238	7.49956	9.13625	8.75837	6.04763	7.57554	4.06881	2.17735	2.63354	5.51799	7.36153	6.21877	3.6638	4.30885	7.67782	8.65147	4.69054	5.25903	4.43967
GSM1607768	2033	1	MALE	61	III-IV	T4	N2	A	7.77416	8.21237	3.80424	5.82315	5.83739	6.61099	7.17394	8.20099	3.53208	7.63909	10.6664	8.08013	5.23196	8.36374	4.56801	3.66852	2.61328	5.04525	7.33032	6.00802	4.2196	3.94587	7.40394	8.12561	5.35214	5.00076	4.44377
GSM1607769	1827	0	MALE	57	III-IV	T3	N0	A	8.1545	7.54946	4.10089	4.7963	4.16286	7.56294	6.10726	7.13751	4.13788	5.59287	10.0057	8.39086	5.18191	7.70788	4.44705	2.87552	1.72407	5.56636	8.58284	6.19244	3.60691	4.64921	7.29065	8.7152	4.86848	5.59476	4.67117
GSM1607770	1872	1	MALE	51	III-IV	T3	N2	A	7.10725	9.95538	4.90448	5.65492	4.5104	5.26097	6.02509	7.86676	4.03995	5.25521	9.92963	8.51406	5.00769	7.92003	4.61628	3.16563	3.06196	5.08924	7.7844	4.94422	3.97342	3.93386	7.30028	8.055	4.3563	5.89312	5.32494
GSM1607771	2025	0	FEMALE	70	I-II	T2	N0	B	6.92373	5.56194	5.05378	5.28378	7.218	5.0327	7.07081	8.17558	4.54225	7.31111	10.2785	9.03006	6.27825	9.0983	5.35361	2.77476	3.38826	5.542	7.94327	5.41145	7.00343	4.10235	7.84361	8.79422	4.63816	5.7828	5.93198
GSM1607772	1855	0	FEMALE	56	III-IV	T2	N1	B	6.92995	7.39095	4.14842	5.96525	6.86279	5.63344	5.79038	8.12767	3.52063	7.10836	9.71746	7.538	5.74092	8.28447	9.37929	2.10533	2.8668	4.93853	9.39206	6.67307	5.36464	3.42376	6.859	8.72424	4.41046	4.95908	4.97651
GSM1607773	2310	0	FEMALE	56	III-IV	T3	N1	A	8.03147	9.3598	3.82351	5.06743	4.55033	6.91544	6.6863	9.65262	3.5053	7.52244	9.95124	8.51689	5.91945	8.15019	4.075	2.88432	3.4411	5.43535	7.32472	6.12252	4.08413	4.92199	7.07406	9.12525	4.18869	5.11843	4.60114
GSM1607774	499	1	MALE	69	I-II	T2	N0	A	7.55748	6.55839	4.75519	4.15184	3.95742	7.13319	7.21986	8.17147	4.17934	6.48465	10.0383	8.84999	6.0422	9.49752	4.29478	4.65608	2.33857	6.1049	8.49369	6.13723	5.47722	5.03995	8.60645	9.79363	4.02975	5.82958	4.08594
GSM1607775	679	1	MALE	40	III-IV	T4	N2	A	7.15676	7.76187	5.18209	4.31708	4.19481	9.24768	6.03347	8.04086	3.97476	6.94365	9.87275	8.90973	5.60432	9.02379	4.29603	4.52224	2.97432	6.32154	8.13615	5.40236	4.24801	5.0875	8.06527	8.50584	3.94945	5.25737	4.38114
GSM1607776	1099	0	MALE	77	I-II	T2	N0	A	6.52731	4.53951	3.63199	6.83331	3.87176	7.76958	5.59373	8.68421	3.10532	5.74641	8.63009	7.68397	5.13506	7.33159	3.92846	2.03581	2.92988	5.784	6.53	4.95046	3.59129	4.00785	7.60668	7.62456	4.95376	4.39913	4.11459
GSM1607777	1219	0	MALE	72	I-II	T2	N0	A	7.50037	6.93946	3.40709	4.84343	4.20033	7.5001	6.5545	6.60849	3.7285	6.89697	9.95124	8.2609	6.91259	8.8833	3.56767	4.22901	2.28491	5.46937	7.57825	6.28701	4.2782	4.29275	7.32134	8.74309	5.51172	5.09842	4.7699
GSM1607778	1904	0	MALE	52	III-IV	T3	N0	A	6.34135	7.75424	4.31064	5.20374	4.82751	4.43755	5.76398	7.80015	4.97806	5.89866	9.24941	8.34099	5.01436	8.81531	3.9786	4.86943	3.14539	5.334	7.49853	6.44212	4.22097	3.64859	8.52523	8.93016	4.73538	5.38075	4.48234
GSM1607779	23	1	MALE	49	III-IV	T4	N2	A	7.01566	8.20348	4.02697	4.76613	4.82195	8.10322	6.15024	8.66616	3.43325	7.24611	10.3425	8.82295	5.63404	8.59472	4.46684	2.88854	2.36643	6.15621	7.88225	5.54849	3.85225	4.35005	8.69848	7.87774	3.47942	5.34559	5.38334
GSM1607780	1176	0	MALE	44	I-II	T1	N0	A	7.20479	7.68752	4.31774	4.70344	3.54834	5.50269	5.68895	7.91321	3.44202	7.08377	10.0515	9.28711	5.32034	9.65341	3.92581	4.54994	3.97273	6.82264	8.73531	6.74944	4.42781	3.89305	8.65788	9.56576	4.24151	5.71731	3.99411
GSM1607781	1147	0	MALE	73	I-II	T2	N0	B	7.66093	9.4252	5.4307	4.56121	6.56425	7.82552	6.79753	9.22837	3.93486	6.98244	9.91466	8.58334	5.28001	8.99531	5.62912	3.85907	2.52569	5.5674	8.51326	4.78121	4.92302	4.65643	7.78912	9.38004	4.55971	5.25833	5.16268
GSM1607782	1178	0	FEMALE	70	III-IV	T1	N1	A	8.08872	8.02721	7.04657	4.915	5.1345	7.73034	6.84008	8.87208	3.61065	6.80707	10.1421	9.2066	5.92411	8.97642	4.64869	2.5759	2.5325	5.529	8.75074	5.34836	5.84438	5.1391	8.07493	8.39959	4.39251	5.40817	4.78231
GSM1607783	1123	0	MALE	63	III-IV	T1	N2	B	7.21888	7.78103	7.03112	4.57646	6.32001	4.13196	6.2983	8.08805	4.26523	6.62563	10.1519	8.39771	5.23899	8.23787	6.97555	3.11309	2.33433	5.64983	8.54098	5.75111	6.12501	4.27447	7.88543	8.05162	3.74003	4.54464	4.74613
GSM1607784	1051	0	MALE	67	III-IV	T4	N0	A	7.84561	8.34043	4.41875	4.99508	4.48861	8.59534	6.09581	8.80333	4.47722	8.10462	9.48499	8.32894	5.76693	8.25933	4.59867	4.63402	2.92424	4.65885	8.61908	5.88002	4.55446	4.22378	7.46654	8.33403	4.44908	5.16754	5.10067
GSM1607785	1184	0	MALE	74	III-IV	T4	N1	A	7.77274	8.6435	3.31271	5.07355	4.03582	8.14527	6.25892	8.66188	4.29518	7.93779	10.1389	8.71899	5.58023	7.91848	4.21015	2.70296	2.07855	5.22439	7.05405	6.40578	4.1041	5.63528	7.43097	8.86859	4.41103	5.19454	4.03774
GSM1607786	1192	0	MALE	60	III-IV	T3	N2	A	8.53084	7.72667	3.44507	4.86739	4.47178	8.70579	7.75202	8.95299	4.13404	4.7749	10.2336	9.15999	5.45671	8.60471	3.48713	3.4502	2.71313	5.5409	8.13776	6.18521	4.16867	5.40253	7.91564	9.16988	4.09491	5.08084	3.93341
GSM1607787	1808	0	MALE	57	III-IV	T3	N2	A	8.32005	8.16014	3.22492	5.22114	4.72065	4.2523	6.5006	8.2355	3.89028	8.36241	10.098	8.34372	5.8171	8.56646	3.29307	4.27761	3.69572	5.18741	8.63398	7.33615	3.46443	3.51239	6.87596	8.73173	5.2325	5.43634	4.90638
GSM1607788	1332	0	MALE	69	III-IV	T3	N2	A	8.1545	7.93483	3.59156	5.37049	4.9014	9.30751	5.57235	8.85612	4.48526	7.81911	10.1248	8.25054	5.51827	8.55238	4.45376	2.75091	2.33785	5.86794	8.43597	5.76905	4.56043	4.53928	7.80693	8.62909	4.16608	5.51368	4.85039
GSM1607789	1305	0	MALE	70	I-II	T2	N0	B	7.01447	7.29264	6.01593	4.48762	4.74103	7.73035	5.89605	10.0293	4.19232	7.45337	9.37222	8.58946	5.13352	8.14109	4.89256	2.82203	2.1721	5.18257	7.73363	4.60988	7.67436	4.99365	8.04637	7.48011	4.25919	5.65601	3.774
GSM1607790	1024	0	MALE	58	III-IV	T3	N2	A	8.31318	6.19528	3.57799	4.26928	4.03324	4.49667	6.34773	7.9731	4.20065	6.99533	10.2185	9.08876	6.44487	8.216	4.44622	3.02048	2.14216	6.2165	9.24153	5.99977	3.61806	5.22668	8.71493	9.42638	4.2896	4.62451	5.53091
GSM1607791	1060	0	MALE	54	III-IV	T3	N1	B	7.35501	8.67463	5.35431	4.76528	7.09651	7.40855	6.82627	7.49209	3.63492	6.47613	10.4011	8.46736	5.86012	7.77832	7.55485	3.02105	2.6362	4.78441	8.25675	6.96949	4.99528	3.47775	7.60668	8.85587	3.68329	5.32628	5.10781
GSM1607792	602	1	FEMALE	68	III-IV	T4	N1	A	7.2969	9.44121	4.32006	4.87959	3.56938	8.03797	7.08367	9.37537	4.69042	7.37488	9.81707	9.09051	5.47867	9.47507	3.4998	3.46159	2.61914	5.79784	8.23135	5.31109	4.19839	5.33894	7.99729	8.64678	4.26628	4.93995	4.74473
GSM1607793	831	1	MALE	77	I-II	T2	N0	A	7.10463	5.97335	5.56777	4.91096	5.09275	7.19016	7.90826	7.71474	3.95076	5.71063	10.2185	8.40886	6.3	8.32163	4.19941	2.52789	3.04306	5.92284	7.35472	6.29243	5.41252	5.31079	7.67214	8.17017	3.94421	5.75401	5.07419
GSM1607794	1067	0	MALE	50	III-IV	T2	N1	A	7.51474	7.71192	4.89577	5.27877	4.47581	7.73431	5.75306	9.53933	4.31797	6.22191	9.37222	8.71334	5.62237	9.23642	5.30172	3.7918	2.28258	5.46697	8.386	4.88874	4.4194	4.23466	8.60107	8.3062	4.19199	5.25352	4.7135
GSM1607795	118	1	MALE	80	I-II	T1	N0	A	7.78897	8.26427	3.18515	6.47717	4.55723	9.37843	5.94315	8.9219	3.05373	6.74637	9.02192	7.77698	4.48643	7.59689	4.67681	2.41056	2.84666	5.0042	6.70499	6.4258	4.40985	4.38142	6.99432	8.07076	5.14477	4.46364	4.27302
GSM1607796	1107	0	FEMALE	57	III-IV	T3	N2	A	6.47691	6.19873	5.17188	4.98943	4.2413	8.18056	6.23142	7.37965	3.61637	6.41327	9.28433	8.99069	6.8876	8.81796	4.517	5.40616	3.06263	6.07681	8.50747	4.81642	4.40759	4.37237	7.68898	8.7152	4.73102	5.56972	5.48227
GSM1607797	954	0	MALE	52	III-IV	T4	N2	A	8.08138	7.35632	5.03384	4.91096	3.9276	4.95678	5.73044	8.57611	4.49873	4.50253	9.59952	9.32888	6.20327	7.96711	4.06911	4.05139	2.34173	5.85098	8.36595	5.65073	4.29709	5.00754	7.2766	8.72424	3.90307	4.99963	5.60075
GSM1607798	834	0	MALE	68	III-IV	T1	N1	A	7.30822	8.99986	4.85622	4.67911	4.76352	6.90951	6.93788	8.42488	4.08052	7.68944	9.70961	8.60794	5.59031	8.65637	4.25529	3.10995	2.5111	5.17401	8.03728	5.99025	4.74041	5.13039	7.7462	8.55875	4.91214	4.70152	4.42365
GSM1607799	253	1	MALE	55	III-IV	T3	N0	A	8.16788	9.04763	3.36163	4.98683	3.99194	7.71627	6.61796	9.52608	4.68451	7.73728	10.0415	8.17425	4.85471	9.17862	3.56253	3.64656	3.28841	4.98052	7.85656	5.48467	4.10912	4.97466	7.47141	8.12737	4.17009	5.21334	4.2505
GSM1607800	1252	0	FEMALE	58	III-IV	T4	N2	B	6.58655	9.27689	4.74019	4.66239	5.12184	6.16215	6.48471	10.1612	4.10675	7.29549	10.1353	8.74281	4.85987	9.51091	4.98556	3.87995	2.34364	5.95176	8.10008	5.38415	6.56444	3.62917	8.2364	9.26989	4.39251	5.83563	4.44035
GSM1607801	521	1	MALE	75	III-IV	T4	N1	A	7.33961	6.71907	4.05301	5.04471	4.75618	7.66611	6.20834	7.61635	3.67114	5.74296	10.1755	9.10722	5.64031	7.76055	3.93671	3.07683	1.92025	6.13935	7.90305	7.65165	4.36149	4.85118	8.24221	8.59133	3.99645	5.52562	4.37214
GSM1607802	968	0	MALE	51	III-IV	T4	N2	A	8.60622	6.40848	4.1024	5.30256	4.64095	7.48695	6.3615	7.97714	4.61712	4.29118	10.4924	9.45264	6.7193	7.83451	3.97318	2.05199	2.55573	6.3516	7.46506	5.64652	4.43305	5.35642	8.50973	9.44346	4.14216	5.04712	4.69193
GSM1607803	429	1	MALE	55	III-IV	T3	N3	A	7.78395	7.30266	3.25957	4.9231	3.74621	7.37924	6.28098	8.59264	3.73699	7.12752	9.69357	8.66939	6.0416	9.26277	3.89126	5.33177	2.36221	6.15744	8.63398	5.45508	3.87304	4.81966	8.17629	9.2353	4.93826	5.39937	5.1665
GSM1607804	1211	0	MALE	71	I-II	T2	N0	A	7.11243	7.25669	3.81675	4.76056	5.16005	5.74895	5.69886	9.43677	3.66085	6.71738	9.96385	8.84506	5.61172	8.65887	4.11433	2.18948	2.46042	5.333	6.85191	5.76399	3.68133	5.14368	8.35482	8.64259	4.91282	5.89987	4.69233
GSM1607805	1182	0	MALE	60	I-II	T1	N0	B	7.36408	7.67055	5.09022	4.94892	5.98073	9.14991	6.39738	7.8735	4.17372	6.97755	9.97694	8.75156	5.85955	8.54775	4.4621	3.38298	3.14746	5.32337	8.70994	5.15116	5.2762	3.80213	7.78731	8.323	4.32509	4.6481	5.10186
GSM1607806	582	1	MALE	82	III-IV	T4	N0	B	7.38204	5.41075	4.51055	6.1126	5.21943	7.1539	6.12831	6.50837	2.86888	3.92365	9.05968	7.44564	5.59577	7.56188	7.83355	2.99274	2.82754	5.32777	9.01786	5.72561	3.67539	3.53546	7.2601	7.84931	4.75294	5.06734	5.17492
GSM1607807	996	0	MALE	52	III-IV	T2	N1	B	7.91421	6.75844	7.44697	6.55932	6.00669	10.116	5.92051	8.02378	3.38959	7.47039	9.28529	7.83999	4.86437	7.91691	7.53558	2.69172	3.42181	4.6351	7.63866	5.94586	5.81716	3.77832	6.85741	8.19169	5.01543	5.57947	3.62127
GSM1607808	979	0	MALE	62	III-IV	T3	N2	A	7.65734	7.31291	3.55185	5.13807	4.45064	8.16309	6.63398	8.71231	3.59421	6.57139	10.193	8.28061	5.5917	7.64335	3.91526	2.85265	2.82593	5.38753	7.92752	6.87475	3.85932	4.4763	7.68108	7.98677	4.18699	5.76284	4.49471
GSM1607809	1043	0	MALE	56	I-II	T1	N0	A	6.98782	8.12045	3.85346	5.5677	4.42455	4.43464	7.30738	8.5518	3.85657	7.08869	10.1353	8.86725	5.48838	8.90886	3.83398	3.23445	2.44259	5.96325	8.44263	5.82822	5.16236	5.52318	8.51323	9.69558	4.65316	5.69	4.39499
GSM1607810	1270	1	MALE	59	III-IV	T4	N2	A	7.86034	6.65516	4.85212	4.80239	4.85029	7.25182	6.71122	8.25058	3.31812	7.76488	9.78843	8.28201	6.38973	8.55451	4.83212	3.71536	2.57599	6.12002	8.19686	7.6417	4.76538	4.49563	8.00492	8.56546	4.58297	5.32087	4.95402
GSM1607811	885	0	MALE	67	III-IV	T3	N0	A	8.06937	6.4686	3.60347	4.24947	3.87451	6.03946	6.90386	9.40787	4.62669	7.29549	9.62491	8.65365	5.34188	8.8347	3.42154	4.28501	3.17599	5.40404	7.93573	5.00916	3.72881	5.24805	7.21481	8.55671	5.2325	5.41297	5.27485
GSM1607812	1185	0	MALE	57	III-IV	T3	N0	A	8.0486	6.85937	3.74862	4.64634	4.23268	5.20158	6.36498	8.07787	4.51208	6.34874	9.79716	9.27483	5.98219	8.8376	4.01987	4.25806	2.49527	6.20005	8.33568	6.50244	4.00966	5.1393	8.34567	8.95368	5.16907	5.65192	5.25527
GSM1607813	811	1	MALE	59	III-IV	T4	N2	A	7.01509	8.13014	3.82327	5.36148	5.22386	6.11701	6.93961	9.77119	3.76403	7.70936	10.3469	8.09562	4.69965	9.37236	4.48744	3.12782	3.70135	4.79083	7.83732	5.67212	4.00572	3.46639	7.31563	8.7727	4.79451	4.27214	4.63448
GSM1607814	1024	0	MALE	66	I-II	T2	N0	A	6.77534	7.56856	3.88053	4.50051	4.37181	6.14331	6.386	10.1651	3.70124	4.01613	10.8096	9.0263	5.20677	7.54673	4.42803	3.70547	3.09727	6.44416	8.65705	5.27775	3.50058	4.84495	8.11788	7.33457	3.94644	5.01638	5.33066
GSM1607815	856	0	MALE	45	III-IV	T3	N2	A	7.99344	8.07009	3.76985	5.42716	3.8175	9.5573	5.75748	8.42025	3.99401	6.99533	9.10576	8.73733	5.37568	8.28447	3.82975	3.71786	1.89726	4.93123	7.9827	5.99654	3.72496	4.24182	6.80357	8.18636	4.20179	4.88502	3.82789
GSM1607816	1017	0	MALE	52	I-II	T1	N0	B	7.54906	10.3275	9.15401	4.94687	5.25106	9.16035	5.99737	7.41373	3.92663	3.31349	10.2487	7.705	5.51827	7.5359	7.9565	2.48047	2.93628	4.93564	6.68174	6.46574	6.41981	3.63415	7.17651	8.33221	3.6637	4.64669	4.4216
GSM1607817	489	1	FEMALE	73	III-IV	T3	N2	B	6.26565	8.19592	5.59925	4.90516	7.11929	6.2074	6.3757	7.55159	3.46739	6.49691	9.57184	8.3794	5.43462	8.69445	7.29684	1.65611	2.02278	5.58498	7.66082	6.31907	6.93344	3.60301	8.13075	8.70882	3.82766	5.73806	4.32289
GSM1607818	1057	0	MALE	64	III-IV	T4	N2	B	7.51773	8.95234	4.681	5.5726	5.28879	9.28817	6.41205	7.62221	3.56794	7.35859	9.64568	8.66774	6.55041	8.23058	7.0071	3.58362	2.9948	5.42905	9.04598	5.71238	4.96658	4.10878	7.31563	9.12861	3.9959	5.02054	4.44898
GSM1607819	1057	1	MALE	56	III-IV	T4	N2	A	7.96096	5.97702	5.51628	5.50149	4.07449	5.28666	5.711	8.16163	4.55061	6.97755	9.55906	8.82113	6.53246	8.01554	4.96485	4.28873	2.14995	5.36848	7.84323	4.20017	3.96571	4.80592	7.5184	8.42945	4.54561	5.43607	4.36531
GSM1607820	1009	1	MALE	71	I-II	T2	N0	A	8.10252	6.98994	3.71837	5.1493	4.94877	5.34428	6.62873	7.95721	4.55739	6.43602	9.5894	9.31851	5.99227	8.99237	4.00954	4.32628	2.84414	6.4275	8.24899	6.51379	3.93378	5.39806	8.42924	9.00678	5.27408	6.14269	4.50158
GSM1607821	1107	0	MALE	54	III-IV	T3	N0	A	7.3209	8.82115	5.2576	4.90954	4.33351	8.68286	6.32421	8.91438	4.06966	7.49956	9.97531	8.6366	4.86932	9.18547	4.03517	4.89919	2.53378	5.10498	7.89996	5.67658	5.51866	4.74171	7.88162	8.44866	4.31587	5.34319	4.73977
GSM1607822	875	0	MALE	49	I-II	T2	N0	A	7.28198	5.5594	7.281	4.29355	5.2477	5.79857	6.15599	8.01533	4.32211	7.18558	10.5005	8.68322	6.94891	7.99113	4.46595	1.92746	2.71584	6.27301	6.63136	5.1991	4.8543	4.39308	8.08047	9.05725	3.59372	5.16562	4.99238
GSM1607823	689	1	MALE	43	III-IV	T4	N0	B	7.51181	9.08198	5.34919	4.77184	5.42714	7.5001	5.53401	8.67793	4.27426	7.51613	10.0252	8.38232	5.86724	8.12394	4.79507	3.00744	2.87826	5.40824	7.64814	7.29303	5.64119	4.29806	7.2277	8.33221	3.9869	5.23144	4.663
GSM1607824	275	1	MALE	57	III-IV	T4	N2	B	8.58115	9.36487	4.36839	4.87938	5.896	8.71306	6.50467	7.36686	3.88361	6.14372	9.64014	8.6096	5.67167	8.50731	7.6521	3.01465	2.19481	5.2303	8.71628	6.40284	6.13699	4.15899	7.78912	9.67293	4.38985	5.4784	4.17033
GSM1607825	631	1	MALE	45	III-IV	T3	N2	A	8.04741	8.49943	3.62304	4.40115	4.06058	6.64206	7.39234	7.59743	4.25552	7.28582	10.3781	8.48771	5.52151	8.03651	4.67955	3.1887	2.83854	5.66342	8.67141	5.7686	3.55044	4.61507	8.07765	8.71106	4.91033	5.46457	4.22421
GSM1607826	1365	0	MALE	66	III-IV	T2	N2	B	7.19593	7.77303	4.33063	4.27734	6.71153	9.36789	6.59014	8.6747	4.15617	7.75797	10.0321	8.56079	4.75728	8.08619	5.68376	2.3218	2.19871	4.67186	6.95992	7.09765	5.17817	3.60891	7.37624	8.61336	4.07622	5.22772	4.27784
GSM1607827	815	0	MALE	57	III-IV	T2	N2	B	8.98169	7.90144	4.33856	4.69373	5.39388	7.80019	6.20713	7.549	3.6001	7.11309	9.56134	8.91828	6.11055	8.39616	7.02344	2.85165	2.23347	5.8357	8.38333	5.78696	5.00327	3.70935	8.94247	10.0556	5.55514	6.76	4.8798
GSM1607828	793	0	MALE	68	I-II	T1	N0	A	7.10463	8.77992	5.47957	4.2779	4.96797	7.44126	6.99358	9.40722	4.17251	7.11777	9.85781	8.95819	5.94046	8.33326	3.99567	3.33193	3.2147	5.9833	7.70297	5.92606	4.7408	4.2342	7.67449	8.17017	4.32329	5.60851	5.16425
GSM1607829	356	1	MALE	78	III-IV	T3	N2	A	7.31623	6.36428	3.70987	4.78081	4.55141	6.27104	7.46251	7.30594	3.68377	5.21882	10.7611	8.66468	6.06235	7.46331	4.04437	2.75071	2.16021	6.19211	8.64457	6.32568	4.05922	5.00148	7.9681	8.31542	3.95957	5.32962	6.18638
GSM1607830	794	0	MALE	65	III-IV	T4	N0	A	8.48013	6.37487	3.20779	5.64767	3.80214	4.70786	6.26635	7.65344	2.95349	7.23549	9.36559	8.17097	6.015	9.68319	3.10548	4.97356	3.63131	5.29667	8.83841	4.59408	3.27008	4.68264	7.40777	9.44346	5.33591	5.91818	4.35728
GSM1607831	793	0	FEMALE	44	I-II	T1	N0	A	7.44798	10.0556	5.81483	4.78208	4.48998	8.45351	5.99762	9.43264	4.05975	8.63002	10.0743	8.53626	5.21581	9.32014	5.73785	3.42831	3.87824	5.26869	8.0444	4.98053	4.91858	4.42889	7.87427	8.51414	4.41743	5.97053	4.25242
GSM1607832	272	1	MALE	71	III-IV	T4	N2	A	8.61334	5.62395	3.64374	5.35848	4.98695	8.12656	6.89088	7.91128	3.5879	5.3759	10.4211	8.06431	5.34188	7.8436	4.946	2.52106	2.34585	4.82922	8.74858	6.02955	4.17383	4.39434	7.36168	8.94103	4.51469	5.48995	4.6649
GSM1607833	1025	0	MALE	56	III-IV	T4	N0	A	7.93384	8.39197	3.98385	3.99446	4.86801	6.8148	7.34539	8.09571	4.17588	6.24481	10.0287	8.66774	5.72034	8.06462	3.29254	4.69308	3.31991	4.96495	8.39496	5.96126	3.64487	5.59387	7.52969	8.34166	4.45106	5.49645	4.77979
GSM1607834	734	0	MALE	53	III-IV	T1	N1	B	6.33763	7.50721	7.19301	5.3113	7.26242	4.67661	6.74594	7.68524	3.8546	6.28968	9.89076	8.4132	5.57675	8.57814	7.11966	2.20139	2.67957	5.57821	7.75591	6.59145	7.04292	3.46689	7.44159	8.43733	3.70361	5.79694	4.63146
GSM1607835	846	0	MALE	72	I-II	T2	N0	A	7.92905	7.77184	3.85078	4.4025	3.89203	5.42488	6.92686	8.80887	4.97244	6.1084	10.3666	9.64618	5.68386	8.36147	3.5541	2.96386	3.04349	5.48105	8.04277	5.52907	3.25183	4.95106	8.53373	9.0907	4.42813	5.28249	4.87282
GSM1607836	713	0	MALE	83	I-II	T2	N0	A	7.42446	6.57773	3.26272	4.2888	4.92103	3.65697	6.81782	8.58644	3.96527	6.06644	10.7429	9.22624	5.45049	8.55451	3.86517	4.20043	2.3893	5.86974	8.84639	7.36572	4.11837	3.51513	8.3442	9.27945	4.67864	5.21244	4.0556
GSM1607837	1245	0	MALE	77	III-IV	T2	N1	B	8.29216	7.66415	5.00055	4.51701	4.1964	9.52279	7.36447	6.56188	4.3368	4.61254	9.86996	8.77333	6.63573	7.53	6.0004	2.11511	2.47076	5.40941	8.86523	5.40147	5.54815	4.12848	7.27619	8.0534	4.13663	4.86197	4.97612
GSM1607838	725	1	MALE	54	III-IV	T4	N0	A	6.8471	6.70809	4.3338	4.98353	4.50552	8.76103	6.01717	7.41437	3.85189	7.11777	9.80863	8.60491	6.30646	8.67662	3.96121	3.20125	2.72824	6.20005	6.97857	6.00644	4.7646	4.99325	7.91564	8.34539	3.45462	5.33884	5.05653
GSM1607839	755	0	FEMALE	53	III-IV	T4	N2	A	7.62038	5.44385	5.41989	5.0723	4.17179	8.16309	6.11275	7.66584	3.76075	7.78531	9.29927	8.75494	6.67086	9.31628	3.7172	5.19774	2.16724	6.18795	7.73639	6.25436	5.54005	4.32209	8.0994	8.41319	4.71753	5.55748	4.83226
GSM1607840	758	0	MALE	46	I-II	T1	N0	A	7.51357	9.57899	5.63168	4.59146	4.39051	7.82039	6.30167	9.4484	4.19747	8.4156	9.65863	8.39637	4.71212	9.27766	4.83751	3.47941	2.70285	5.28704	7.61269	4.80361	4.69948	4.82483	7.71786	8.11008	4.00103	4.34886	4.26998
GSM1607841	417	1	MALE	73	III-IV	T3	N0	B	7.62126	8.93917	3.73571	4.86305	7.32096	7.51319	5.62563	8.79659	3.32164	5.44976	10.1652	8.60794	5.18989	7.47164	6.42158	2.37932	2.27945	5.24439	7.47849	6.8049	4.86994	4.13974	8.56857	8.22222	4.88525	6.0869	6.57126
GSM1607842	1291	0	FEMALE	50	III-IV	T3	N1	A	7.95404	8.2189	4.41507	5.33063	4.27249	8.8158	6.51998	8.37127	4.90497	7.0887	9.49216	9.13707	5.74532	8.59242	4.02017	3.96201	1.80288	5.70475	8.94264	6.0418	4.47246	4.02697	7.73817	9.18746	5.17246	5.16997	4.27466
GSM1607843	269	1	MALE	73	III-IV	T4	N1	B	7.13185	6.12913	6.41858	4.77654	6.43103	7.01949	6.90167	7.84962	3.36493	7.21606	9.59184	8.68322	5.88581	8.05964	7.67444	2.79175	3.48115	5.99261	9.44857	8.50049	6.90141	4.2853	8.30432	8.67168	4.66874	5.29887	4.53095
GSM1607844	730	0	MALE	62	III-IV	T2	N2	B	7.55668	6.17367	5.37087	5.32058	5.1513	9.09376	5.95832	7.62447	3.76036	6.15866	9.35259	7.58686	4.83742	7.76894	5.63317	3.70816	3.05489	5.10654	7.66408	5.16805	5.15633	3.39695	6.91649	7.52086	4.28991	5.07198	4.16173
GSM1607845	882	0	MALE	63	III-IV	T3	N2	B	7.23048	5.99034	3.93705	5.04514	7.11436	5.34811	6.21251	6.4071	3.09531	4.30817	9.29147	9.40637	7.11201	8.31974	3.7536	1.55731	2.87952	5.85292	8.1639	7.49956	5.4429	3.62372	8.25535	9.01793	5.49088	5.4458	5.27289
GSM1607846	764	0	MALE	59	III-IV	T4	N0	A	7.5845	9.892	3.72813	4.98057	3.66867	9.11248	6.13381	9.14299	4.27382	7.70297	10.4073	9.22624	5.34733	9.0175	3.74265	2.80903	2.37939	5.25727	8.27478	5.16321	4.04267	5.02286	7.90514	8.33601	4.3257	5.05985	4.93161
GSM1607847	1059	0	MALE	57	III-IV	T2	N2	A	8.02101	8.59443	3.64101	5.11218	4.72204	7.09099	5.98536	8.56715	4.45482	7.92279	9.74916	8.35072	4.93023	9.51091	4.1351	4.33922	2.78869	4.91579	8.15865	5.57446	4.08603	4.05935	7.34587	8.4888	4.84201	5.10137	3.82292
GSM1607848	743	0	MALE	62	III-IV	T4	N0	A	8.68077	7.28019	4.18294	5.24413	4.2074	6.89739	6.12622	8.00128	4.2689	6.80389	9.90584	8.35343	6.09966	8.90039	4.15212	4.21279	1.88775	5.24222	7.39518	5.5767	3.96158	4.11201	7.8569	9.72935	4.2519	5.67171	3.87319
GSM1607849	257	1	MALE	57	III-IV	T3	N2	B	7.32692	9.99479	8.64544	4.84099	5.63162	8.29881	6.32129	7.56935	3.71844	3.91869	10.0946	8.43681	5.47867	7.56553	6.94073	2.28843	3.8433	5.6749	6.9459	6.32862	6.04113	4.1701	7.52969	8.15107	3.93706	4.46823	4.75355
GSM1607850	617	1	MALE	78	I-II	T1	N0	B	6.4836	7.13882	4.27455	5.6693	5.06741	8.73629	5.47441	8.27416	4.30663	3.91147	9.6196	8.41628	6.13377	7.82069	5.21897	3.21678	3.71402	5.32724	7.23254	5.6669	5.14756	4.76869	7.42363	8.7152	4.02336	5.34799	4.21602
GSM1607851	120	1	MALE	56	III-IV	T2	N2	A	7.89706	7.03961	3.90518	5.07003	4.39541	7.26239	6.68146	9.56204	4.07595	6.59766	9.9356	9.14264	6.50613	8.14464	3.69642	3.45799	2.97139	6.81508	7.97603	5.35042	3.92608	5.29805	7.5487	9.32367	4.26746	6.15681	4.66381
GSM1607852	1162	0	MALE	58	I-II	T2	N0	A	7.22607	8.49587	3.85564	4.62051	5.15516	3.30413	6.55065	8.66294	4.25879	6.85597	10.1421	8.94232	5.31742	8.97961	3.91265	4.05222	2.88717	5.59133	8.34114	5.76032	4.65643	4.92706	8.05583	8.74309	4.58387	5.13556	5.47959
GSM1607853	758	0	MALE	70	III-IV	T4	N0	A	7.28754	7.66736	4.45398	4.77486	3.90132	7.99681	7.19658	9.95254	4.20888	7.02755	10.0649	8.79115	5.47464	8.56396	4.17672	3.3842	2.26398	5.35675	8.19095	5.37174	4.51451	5.47682	8.28063	8.26836	4.19052	5.27571	4.57311
GSM1607854	765	0	MALE	45	I-II	T2	N0	A	7.58118	8.41933	3.96381	5.33527	4.75648	6.43596	6.94794	8.94494	4.62085	5.79405	9.99315	9.06266	6.26165	8.43675	3.95842	3.05228	1.70197	5.56964	7.53816	5.87481	4.42834	5.11972	7.56163	8.13467	3.84811	4.63908	4.52026
GSM1607855	146	1	MALE	50	III-IV	T3	N2	A	7.56006	7.57598	5.26338	4.47025	4.33017	6.93117	7.00075	7.91647	3.64491	7.48212	10.045	8.53626	5.68087	9.35942	4.81133	4.99968	2.28198	6.04522	8.76059	6.89613	4.74422	4.21034	8.485	8.97016	4.75363	5.53684	4.87933
GSM1607856	209	1	MALE	60	III-IV	T4	N3	A	7.74584	7.12725	5.12504	4.95921	4.32579	6.53714	6.516	6.93559	4.9783	5.68104	10.4802	8.85687	6.80985	7.70515	4.56915	2.6804	2.90408	5.9359	8.98395	6.74591	4.33063	4.69688	8.59042	8.41522	4.53908	5.58714	5.35211
GSM1607857	769	0	MALE	75	III-IV	T3	N2	B	8.88511	5.59493	4.7648	4.50401	6.00234	7.4568	6.53005	7.36563	3.93775	6.00823	9.42725	8.96165	6.015	8.20703	8.54393	2.25639	3.25097	5.84776	9.0511	6.03694	4.2576	4.01322	7.8569	10.0754	4.91791	5.43911	6.00114
GSM1607858	785	0	MALE	52	I-II	T1	N0	A	7.50685	8.52715	3.54642	4.56812	4.47003	7.39988	6.15212	9.61895	4.62816	7.45337	10.9965	9.20857	5.60461	8.63649	3.63539	3.74857	2.71627	5.97645	7.86859	4.93474	3.91625	5.2767	7.44966	9.28257	4.09328	5.57228	4.11503
GSM1607859	843	0	MALE	43	III-IV	T2	N1	A	7.66467	7.69082	4.02697	4.73243	4.46238	9.55731	6.82111	8.60806	4.86387	5.63946	9.49216	8.86197	5.83347	8.91167	3.97479	3.48547	1.95432	5.52556	7.62047	5.33611	4.11722	4.88331	7.62628	8.20947	4.22766	5.37435	4.4259
GSM1607860	826	0	MALE	77	III-IV	T4	N0	A	7.76195	8.31731	4.69801	5.16041	3.95816	8.44031	6.1971	8.84446	4.11132	5.44207	9.74916	9.07618	5.16866	8.26315	4.08063	4.0549	2.80278	5.25578	8.55913	5.37477	3.69077	5.64772	7.12513	8.3268	4.54289	5.28854	5.036
GSM1607861	258	1	MALE	57	III-IV	T2	N3	B	7.47109	6.92952	4.26696	5.73689	6.53501	8.69105	5.93652	8.52123	3.62303	6.91773	9.62237	8.48201	5.12076	7.7633	4.57015	2.43966	2.95569	5.1308	6.99403	7.00384	5.5099	4.24777	7.5572	8.33601	4.08234	4.91214	4.22587
GSM1607862	139	1	MALE	48	III-IV	T4	N0	A	7.81662	8.16014	6.26551	4.84551	5.62765	5.54884	6.01468	7.76118	3.31971	8.1368	10.145	7.7111	5.51076	7.58181	4.72831	2.43339	3.52239	5.41071	7.51955	7.68301	4.76538	3.49462	7.31847	8.53321	4.69346	4.47986	4.22594
GSM1607863	710	0	MALE	47	III-IV	T4	N2	B	6.99386	9.29633	5.76697	4.28083	4.67952	7.25	7.47601	9.08744	4.25834	7.52244	9.62987	8.69434	4.91761	9.31233	5.51202	4.29192	3.01607	5.36743	8.14885	4.92996	6.93897	4.20473	8.10498	8.39959	3.89823	5.75559	3.93714
GSM1607864	769	0	MALE	51	III-IV	T4	N2	A	7.96096	6.66949	4.2774	3.69891	4.02361	5.96276	7.3201	10.4365	4.56999	5.79205	10.5617	8.81257	6.30716	7.74722	4.11725	2.40567	4.73145	5.64838	7.79535	7.20007	4.08213	3.67579	7.46561	8.28931	4.93285	5.63616	4.84723
GSM1607865	305	1	FEMALE	71	III-IV	T2	N2	A	7.80955	6.66416	4.18903	4.4289	3.77715	7.07445	7.20724	8.8859	3.54311	3.79792	10.2939	8.42739	4.8296	7.27172	3.23697	2.1825	2.83537	5.25578	9.33525	6.06251	3.21433	4.486	7.52331	9.16245	4.92578	5.3597	4.72516
GSM1607866	871	0	MALE	52	III-IV	T4	N2	A	7.80649	6.0058	4.22121	5.08264	3.92628	7.61885	5.81111	8.26884	3.82827	4.83271	10.4134	9.20249	6.59425	8.17284	4.76689	5.22838	2.56899	6.73779	8.13283	6.29358	4.21928	5.37884	8.12783	9.4473	5.28873	5.77804	5.43415
GSM1607867	466	1	MALE	76	III-IV	T4	N2	A	7.44877	9.13618	4.36369	5.17974	4.93873	9.0463	6.17008	8.30052	4.33805	7.65181	9.44803	8.65995	5.21028	9.36789	4.37704	4.65023	2.41417	5.4554	8.77738	5.51969	4.88436	4.48988	8.29401	8.38702	4.45781	5.74922	4.18418
GSM1607868	855	0	MALE	61	III-IV	T1	N2	B	6.71311	7.26866	6.01398	5.19009	6.36009	8.42608	5.94857	8.4625	3.66433	6.88827	9.86391	8.27113	5.17021	8.58044	6.58812	3.72785	3.72703	5.51087	7.7711	6.05486	5.53067	3.71829	7.52864	8.58673	4.72968	5.17148	4.41009
GSM1607869	857	0	MALE	47	III-IV	T4	N1	A	7.69948	7.52936	4.29379	5.03979	4.91211	4.79114	5.7821	7.90689	4.47463	5.8504	9.33365	9.18329	6.17508	8.2999	3.56024	2.70683	2.08765	5.55387	6.89673	5.42265	4.11394	4.2498	8.14486	8.61788	3.97888	5.1365	4.65066
GSM1607870	840	0	MALE	58	III-IV	T4	N2	B	7.99019	8.06486	5.87135	5.00383	5.267	5.68107	6.57574	6.46758	3.86388	7.73728	9.71469	8.60653	6.95527	9.01407	5.45583	3.1465	2.1705	6.39409	8.04978	7.59329	5.29921	5.17841	7.87305	8.0534	3.62886	5.20365	6.4736
GSM1607871	147	1	MALE	54	III-IV	T4	N2	B	6.42183	6.5687	5.20672	4.77747	7.59033	7.04854	6.34159	7.14337	3.42167	6.35451	9.78843	8.1325	5.6375	8.39616	7.10222	2.06898	2.92147	5.50204	7.41769	6.63863	6.98817	3.46285	7.24694	8.15627	3.84093	4.39658	4.74821
GSM1607872	182	1	MALE	52	III-IV	T4	N3	A	7.82059	8.30809	4.39358	5.58678	5.15148	3.90207	6.18003	8.35114	4.05549	6.76334	10.5217	8.38515	5.61364	7.52527	4.19407	3.54423	3.48312	5.72909	8.34114	7.24142	3.86023	4.43864	7.35188	8.30823	4.81083	4.70803	3.98477
GSM1607873	825	0	MALE	49	III-IV	T3	N2	A	8.10195	8.26571	5.08503	4.86684	4.32792	7.99066	6.29241	8.50601	4.28954	7.73092	10.1487	9.0263	5.44992	9.1989	5.35112	4.48893	2.38327	6.00549	8.70549	4.77443	4.53237	4.80161	8.71849	9.59855	4.45462	5.54319	4.19159
GSM1607874	790	0	MALE	56	I-II	T2	N0	A	7.34772	8.26127	3.50781	5.15651	4.17187	6.38694	6.30671	8.30335	4.62379	7.00871	9.43402	8.93394	5.13861	8.94762	3.71734	3.53698	2.30773	5.49578	8.14245	5.31171	4.8638	5.4624	8.05445	8.63378	4.37927	5.50137	4.49441
GSM1607875	877	0	FEMALE	54	I-II	T2	N0	A	8.22001	7.97421	3.23883	4.19334	4.24467	3.46839	6.77362	7.20157	4.12184	6.05397	10.4093	8.74206	6.12025	8.16442	3.77441	3.42683	2.73874	6.12362	8.37135	5.94374	3.61098	4.98916	7.69803	9.40368	4.36682	5.4153	5.14415
GSM1607876	813	0	MALE	76	III-IV	T2	N2	A	7.29108	7.64142	3.79484	5.43982	4.36109	8.55907	7.20162	9.4484	4.53452	7.84645	10.1688	9.12954	7.3758	9.22884	3.70222	2.76704	2.15591	6.13998	7.67911	4.46643	3.56362	5.44795	8.67193	9.16695	4.5128	6.03202	5.8059
GSM1607877	268	1	MALE	59	III-IV	T3	N2	A	7.19523	8.34565	4.96788	4.97022	4.50868	7.77971	6.18003	7.78923	3.53599	7.32182	10.0484	8.43009	5.91414	8.43476	5.03628	3.02499	3.12277	5.89807	7.90449	7.7346	5.46902	3.87775	8.19856	7.91147	3.93258	5.13902	4.88064
GSM1607878	785	0	MALE	49	III-IV	T2	N2	B	6.8638	6.34816	7.85348	4.97788	5.41975	7.67993	5.72935	7.54468	3.69864	6.87631	9.27288	8.08842	5.11833	8.63139	6.78327	3.6583	4.27494	4.70908	8.14885	5.46105	6.83995	3.53843	7.35969	7.89513	3.55632	4.76048	5.0418
GSM1607879	777	0	MALE	56	III-IV	T2	N2	B	7.45564	7.00345	5.02951	4.74452	5.52966	6.38236	6.30602	7.4678	4.51951	6.14618	8.91823	8.61192	6.89906	7.75124	5.41616	2.47256	2.07148	6.26676	9.56585	6.25321	4.98672	4.52178	7.70142	9.24163	4.16016	5.62714	5.67113
GSM1607880	778	0	MALE	62	III-IV	T3	N2	B	7.27342	8.74573	6.01348	4.95516	4.90054	7.8719	5.91246	8.12511	3.47399	6.13644	9.54053	8.56967	5.649	8.52776	8.16737	2.28883	2.62184	5.98961	8.53133	5.22149	5.03838	3.97058	7.57635	8.4014	4.61325	5.34182	4.76093
GSM1607881	787	0	FEMALE	75	I-II	T1	N0	A	7.95235	7.54091	5.70443	4.34176	5.20011	5.28184	6.92992	8.63975	4.01764	7.27125	9.78286	9.06087	5.34623	8.30611	4.20983	2.93513	3.1809	4.97982	7.29282	5.96126	5.0834	5.16356	7.9786	9.31772	3.52824	5.01806	3.82991
GSM1607882	750	0	MALE	48	I-II	T2	N0	A	7.62214	9.26403	4.60555	5.04959	4.63314	8.5168	6.39149	9.43972	4.54414	7.04167	9.73319	8.53909	5.99259	8.76046	4.05863	5.26975	2.27922	5.3448	8.17997	4.92715	4.70997	4.51096	8.32257	8.12403	4.13693	5.11757	4.71051
GSM1607883	324	1	MALE	66	III-IV	T4	N2	A	7.62389	4.92956	4.48317	5.0047	4.01869	7.27295	7.1331	8.96623	4.11113	4.92422	10.7753	8.45856	5.28771	7.12895	3.77184	2.59661	2.22539	5.01418	7.70021	7.21015	4.05457	4.8182	7.32933	8.44118	3.80328	4.89851	4.75552
GSM1607884	1115	0	MALE	44	III-IV	T4	N2	A	8.14182	6.97615	4.35496	5.25757	4.14004	7.80019	6.33217	8.63033	4.63806	7.65181	10.2821	8.41479	5.61228	8.81796	3.84826	3.81603	2.62652	5.83867	8.37697	6.3358	4.45739	4.58596	8.39597	8.8052	5.05033	5.64178	4.77674
GSM1607885	279	1	MALE	52	III-IV	T3	N2	A	8.37349	9.75654	3.65947	4.7221	4.68056	7.18628	6.19554	9.41412	4.17289	8.28217	9.75198	9.31	5.8021	8.91474	4.32277	4.31185	2.15762	5.34078	8.21604	5.97798	3.79156	4.64661	7.399	8.64931	5.20732	4.54881	4.46887
GSM1607886	741	0	MALE	48	III-IV	T4	N2	A	7.76832	5.89565	3.61624	5.10181	3.45693	5.2252	6.84593	8.02629	4.71732	5.87198	10.5752	8.10062	5.17127	9.4796	3.19774	4.17514	2.29924	5.55169	8.84279	4.63297	3.3888	5.57962	8.32578	8.46519	4.3136	6.04227	5.1783
GSM1607887	764	0	MALE	70	III-IV	T2	N2	B	6.7504	5.06921	5.32845	4.39051	6.92172	5.07404	6.60686	6.66456	4.19811	6.75222	9.84044	8.60491	6.53632	8.7046	7.82155	3.23482	2.96233	6.00489	7.59962	7.67765	5.36792	4.42641	6.91163	8.76695	4.15706	5.60345	4.30041
GSM1607888	769	0	MALE	58	III-IV	T2	N1	A	7.87188	9.20447	4.51673	4.97868	4.57416	7.68407	6.43948	9.86261	4.01503	7.67687	9.3546	8.4132	4.9938	7.78666	4.59327	4.42321	2.39995	5.83035	8.05298	4.87638	4.09984	3.81325	8.01136	8.30438	4.78308	4.99594	4.9057
GSM1607889	751	0	FEMALE	35	I-II	T1	N0	B	6.94258	9.96786	7.32198	4.44535	4.32404	8.40751	6.44669	9.43129	4.13742	8.28217	10.0321	8.95986	5.28053	9.28145	5.86132	3.76266	2.24238	4.89449	7.94173	5.42099	5.16869	4.98762	7.73817	8.59351	4.20712	4.68937	4.72353
GSM1607890	212	1	FEMALE	82	III-IV	T4	N2	A	7.6439	9.17829	3.36231	3.80892	4.64362	8.70579	8.47426	8.18385	4.85009	5.77648	9.47349	8.96521	5.23407	8.61191	3.36963	3.23804	2.85457	5.88724	7.96449	6.08469	4.29931	4.91676	7.88034	8.50584	4.46649	5.65058	3.83326
GSM1607891	325	1	MALE	68	III-IV	T3	N3	B	6.66643	7.31176	6.92207	5.17115	6.97586	6.68078	6.31402	7.9366	3.66381	6.00061	9.49094	7.64441	5.29646	8.20503	5.74724	2.16059	2.44856	5.19117	7.32472	6.79684	7.69887	3.50111	7.02632	8.20225	4.34374	5.24882	3.68323
GSM1607892	616	1	FEMALE	59	III-IV	T4	N2	A	7.26567	7.27674	4.2095	4.21532	5.0491	7.67993	6.20042	8.11312	4.03116	5.20786	10.0415	9.10347	5.66774	7.96852	4.44219	3.07236	2.9254	6.03504	8.15717	7.2207	5.12578	3.86218	8.21739	8.43516	3.84785	4.82732	5.14475
GSM1607893	776	0	MALE	61	III-IV	T2	N2	A	7.53177	8.04522	4.9021	5.60889	5.82013	8.58846	6.1498	7.55715	3.38552	7.57653	9.79716	8.70552	6.9134	8.64371	4.47746	3.18046	3.59715	5.47286	7.74753	6.05707	5.10185	3.77518	7.42559	8.69724	4.4776	5.00572	5.92526
GSM1607894	825	0	MALE	70	III-IV	T4	N2	B	7.75942	8.88293	4.34345	4.85526	5.71544	7.85099	5.79776	8.68938	3.3902	7.87742	9.65093	8.52579	6.10551	7.90607	6.09247	3.59896	2.73339	4.75807	7.63751	5.92138	4.89022	4.20564	8.28962	8.00973	4.40877	4.8568	4.58948
GSM1607895	1357	0	MALE	59	III-IV	T2	N2	A	8.7936	7.69984	3.61541	4.51992	5.03527	5.87352	6.30871	7.49209	4.40086	6.69642	10.2416	8.54857	5.44143	9.05872	3.88612	2.71432	2.93524	5.84088	9.55276	7.1663	4.10476	5.24221	8.52017	10.2454	5.63967	5.85091	4.75141
GSM1607896	1063	1	FEMALE	47	III-IV	T3	N2	A	7.75844	7.39353	3.81816	4.76707	5.17131	7.38726	6.28979	8.40271	3.95771	6.68696	10.5663	8.6096	6.01952	7.15176	3.89242	2.54945	2.83562	5.64924	7.78366	6.07428	4.27661	4.51563	7.70599	8.5182	4.65819	5.12447	4.84865
GSM1607897	294	1	MALE	59	III-IV	T4	N2	A	7.22818	8.8149	3.4045	4.71852	5.85051	9.09376	7.19425	7.52566	3.28841	6.45465	9.6561	9.12213	5.46736	8.29209	4.40967	2.62531	2.87976	5.43967	8.17997	6.92762	4.29054	4.80669	7.32421	8.98079	4.59648	4.77271	4.06941
GSM1607898	680	0	MALE	53	I-II	T1	N0	A	7.67581	7.67436	3.612	4.67121	4.54232	4.67397	7.39597	8.1235	4.374	7.54478	9.67989	8.64255	5.93193	8.38433	3.64658	4.32222	3.52289	5.18986	7.39044	5.49391	3.80064	4.7716	7.82189	8.31542	4.75427	4.27691	4.94988
GSM1607899	689	0	MALE	75	III-IV	T4	N2	A	7.21575	9.44933	4.17539	4.38312	3.74542	6.58876	7.5497	9.79107	4.28825	7.53423	9.96726	8.55613	4.87551	9.53703	4.79473	3.23235	3.01695	5.17401	8.60437	4.73292	4.80111	3.79694	7.95515	8.88407	4.84008	5.62714	4.38901
GSM1607900	657	0	FEMALE	60	III-IV	T2	N1	A	7.41502	5.88693	3.88135	5.79257	5.68677	7.41073	6.05304	8.6166	3.84176	6.26059	10.1755	8.18338	7.05546	8.13218	3.8687	2.03044	1.79869	5.62471	7.73498	6.03456	4.53632	4.67924	7.61744	9.42952	4.95606	5.82801	5.01696
GSM1607901	366	1	MALE	61	III-IV	T4	N2	B	7.31116	6.04265	7.45897	4.55315	6.06677	8.68286	6.01754	7.72821	3.84135	6.93912	9.37004	8.0255	5.41332	7.93836	5.53532	4.84852	2.33822	5.42778	7.57495	5.94167	6.39849	4.08238	7.15471	8.06575	3.94258	5.3636	4.25432
GSM1607902	611	1	MALE	70	III-IV	T4	N3	B	8.06819	8.08933	5.24179	5.68145	6.06848	6.21482	6.58471	6.88593	3.85929	7.51613	9.59419	8.59255	6.1424	8.09801	7.69378	2.29356	1.87328	5.13107	9.13613	5.343	4.98297	3.50538	7.71063	8.46744	4.36285	5.08607	5.99302
GSM1607903	665	0	MALE	61	I-II	T2	N0	A	8.13253	6.55983	3.9704	4.72933	4.11649	6.34084	6.40836	8.69492	4.82483	7.18051	10.323	8.8298	5.86012	8.74666	3.27664	3.58209	2.21146	6.2516	8.45867	5.64725	3.80483	4.85747	7.97603	9.08503	4.64016	5.77113	4.95117
GSM1607904	701	0	MALE	69	III-IV	T1	N2	B	7.48095	10.2059	7.58907	4.91114	4.17266	9.2675	6.04846	9.64782	3.69358	7.84645	9.55228	8.16609	4.66424	8.64613	6.50019	3.44976	3.06238	4.71778	7.22799	5.57606	6.3449	4.6154	7.24694	7.84529	3.67124	4.61625	4.39217
GSM1607905	657	0	MALE	58	III-IV	T4	N2	B	6.85039	8.38655	6.37165	5.29521	5.01252	6.84217	6.31452	8.63357	4.11939	7.21606	10.0092	8.91313	5.7462	9.14926	5.02535	3.08676	2.43398	5.8797	8.0405	6.35701	5.70201	4.0867	7.64818	8.66929	3.37209	5.27476	4.86963
GSM1607906	632	0	FEMALE	70	III-IV	T4	N0	A	8.7344	7.21432	3.51355	4.32799	4.3641	8.78464	6.71484	7.47723	4.63455	6.69966	9.77727	9.26309	5.82442	7.47504	3.94155	3.0435	3.10678	6.1164	8.1687	6.11583	3.82466	5.90119	8.05725	8.53321	4.17226	5.38805	5.18236
GSM1607907	161	1	MALE	79	III-IV	T1	N2	B	7.49547	6.59477	5.47518	5.2608	6.45028	4.14496	5.82281	8.20453	3.1155	2.88788	10.6638	7.99222	5.5138	7.49495	6.5758	2.20873	2.80117	5.59508	7.85339	7.98796	5.3227	3.55557	7.91091	8.36919	4.62981	5.00055	4.12977
GSM1607908	415	1	MALE	59	III-IV	T3	N3	A	7.27563	6.68434	3.8396	4.63363	4.3397	5.1416	6.18463	8.46158	4.1461	6.90747	10.1284	9.03006	6.03471	9.33639	3.46086	4.58758	3.77319	6.08552	8.68421	5.49323	3.65154	4.90622	9.04849	8.82965	4.95702	5.23691	4.54874
GSM1607909	619	0	MALE	76	III-IV	T4	N1	A	8.03147	5.14654	3.95783	4.7729	4.47202	4.40146	7.40548	7.76233	4.47112	4.37235	10.0057	9.61196	6.80832	7.84622	4.11047	2.49296	3.09536	6.15803	8.98015	5.95033	5.07135	4.85422	7.95015	9.21082	4.80173	6.38138	5.35516
GSM1607910	605	0	MALE	54	III-IV	T2	N2	B	6.56653	7.94272	3.37972	4.39121	4.6343	5.99803	6.91755	7.98492	4.05919	6.65638	9.55683	9.21613	6.39605	8.75216	6.78994	2.60505	3.0248	6.66212	9.30018	4.70067	5.08959	4.75284	8.22033	9.0093	4.18036	5.77831	4.85255
GSM1607911	652	0	FEMALE	86	III-IV	T4	N2	A	8.05455	7.43276	5.14839	4.45155	3.49286	7.48695	6.77639	8.14493	4.17251	7.34282	9.51857	9.01726	5.44442	8.69939	3.63707	5.53273	3.1747	5.4889	8.15865	5.71998	4.10959	5.22229	8.23207	8.4448	4.84861	4.7403	4.73568
GSM1607912	643	0	MALE	60	I-II	T2	N0	A	7.56259	7.79845	5.54758	5.45934	4.81846	8.96803	6.77173	8.35215	4.24811	7.17084	9.94161	8.09437	5.50042	8.54328	4.21948	4.25369	2.40443	5.66178	7.4998	5.55073	5.45099	4.64839	7.41271	7.8998	3.9456	5.42465	4.7788
GSM1607913	603	0	MALE	49	III-IV	T4	N2	A	8.03608	8.04595	5.25718	4.89787	4.65386	6.84523	6.86515	9.70092	4.15667	6.4605	9.35048	8.08728	5.48252	8.14293	4.83157	2.25817	2.77097	5.31746	7.74328	5.11517	3.75978	4.46963	8.68271	8.18087	3.67376	4.70171	5.18967
GSM1607914	1210	1	FEMALE	70	III-IV	T4	N0	A	8.31318	6.77434	6.81652	6.20455	4.69729	8.96803	5.69072	7.47792	3.2031	7.99968	9.68503	8.01298	4.50587	7.8794	4.26144	3.0966	3.18064	5.07317	8.09042	6.58594	4.98409	3.92295	7.02796	9.00172	5.63398	5.11035	4.45338
GSM1607915	510	1	MALE	86	I-II	T2	N0	B	6.82386	8.28995	3.89037	4.76339	6.61363	7.09754	5.90513	6.90613	3.48469	5.82879	9.72809	8.46154	5.70847	9.10516	8.36359	3.31802	1.41838	6.06658	7.91791	6.88166	5.93489	3.65316	8.13075	8.57854	4.1285	5.49939	4.83843
GSM1607916	662	1	MALE	55	I-II	T1	N0	A	6.81705	8.6936	3.51016	5.01012	3.995	6.42252	5.49216	8.58107	4.39953	6.94815	9.82578	9.32445	4.82676	9.36789	3.54447	3.19817	2.00505	5.97503	8.19851	5.58924	4.53466	5.51855	8.16319	8.8995	4.68696	5.20206	4.31664
GSM1607917	188	1	MALE	70	III-IV	T3	N0	A	7.07238	6.43108	5.05219	5.29596	4.3828	6.70894	6.87019	8.46939	3.22531	7.60061	9.23047	9.00141	5.96864	9.3934	4.20265	5.16628	3.4448	6.15123	8.57908	5.8676	4.25976	5.34226	8.03116	8.46973	5.32749	6.1111	4.38553
GSM1607918	46	1	MALE	70	III-IV	T4	N0	B	6.30501	5.02149	8.52317	5.28916	6.82252	7.89348	6.70444	6.12615	4.85846	2.40821	9.6196	7.95979	5.71448	7.71315	5.18654	1.85643	2.64681	5.63106	7.08889	6.36711	7.39834	3.36109	7.55496	7.89513	4.27585	6.14413	4.259
GSM1607919	783	0	MALE	67	III-IV	T4	N0	A	8.48484	8.09623	4.69041	4.84857	4.57862	7.6144	5.98125	8.12007	4.20994	7.27125	9.70665	8.13373	5.58251	8.68427	5.35246	4.40264	1.98114	5.64812	9.01021	4.9619	4.836	4.20669	7.68001	8.34736	4.13051	5.18222	4.29111
GSM1607920	1067	0	MALE	74	III-IV	T4	N0	A	7.65016	8.00234	3.67702	4.3223	4.93485	4.87749	6.35182	8.00773	3.46804	6.88431	10.6015	8.58946	5.39813	7.79787	3.33673	2.79474	2.39914	5.82168	8.06202	7.14661	3.90256	4.27476	7.9825	8.53953	4.40877	5.40619	4.09495
GSM1607921	344	1	MALE	63	III-IV	T3	N0	A	7.65557	7.75291	4.16452	4.18772	3.78505	4.125	6.77682	8.85952	3.45131	6.8724	10.2185	9.12954	5.27591	8.91474	4.18638	2.95506	3.31531	6.2847	8.14413	6.06618	3.21007	5.03812	8.485	8.98889	4.49597	5.50628	4.86978
GSM1607922	833	0	FEMALE	63	III-IV	T3	N0	A	8.15208	7.60046	3.93373	4.58526	3.98891	9.52279	6.9141	8.68724	4.34565	7.86982	9.19701	8.60794	5.45729	8.55451	5.36111	4.47907	3.09097	4.88319	7.849	5.92138	4.14225	4.73268	7.49964	9.11402	4.68163	5.74287	4.42973
GSM1607923	805	0	MALE	58	III-IV	T4	N0	A	7.88557	8.69709	3.85708	5.09013	5.84674	8.34815	6.08427	8.59474	3.70697	7.53423	9.58433	8.05156	5.1798	8.34944	4.09798	2.51575	2.43637	5.25879	6.66336	6.72221	4.72132	3.69895	7.91814	7.90641	4.23035	5.11482	5.28853
GSM1607924	154	1	FEMALE	87	III-IV	T3	N0	A	7.63559	8.49226	3.34894	5.39305	3.84884	8.40045	6.23034	9.0285	3.8867	6.81952	9.55906	9.37262	5.17695	8.70969	3.35727	2.893	3.26602	6.1645	8.15294	5.69975	4.15066	5.42596	7.29359	8.312	4.90718	5.21705	4.04344
GSM1607925	734	0	MALE	68	I-II	T2	N0	A	8.08138	6.45833	3.32829	5.53493	4.0049	8.01411	6.09636	8.98232	4.1248	7.7993	9.0828	8.50388	7.22304	8.31974	3.22983	5.05074	3.14368	5.56341	7.80281	5.83502	3.42496	4.52333	7.98633	9.69948	5.29287	5.68737	4.67799
GSM1607926	198	1	FEMALE	51	III-IV	T4	N0	A	7.30099	9.02443	6.95336	4.93686	4.86959	8.63845	6.49595	7.15147	4.48889	4.62733	10.8044	8.59403	6.03536	7.55304	5.07018	2.52216	1.94383	6.18371	7.62322	6.35701	4.53466	4.39102	7.63982	8.19692	3.92136	4.49763	5.28343
GSM1607927	578	1	MALE	53	III-IV	T3	N2	B	6.83176	5.80273	4.62346	4.97375	7.15838	7.54693	6.12831	6.88191	3.69177	3.64317	9.81999	8.52719	5.62824	8.11393	7.19054	2.26738	3.26858	5.45669	7.72809	7.117	6.91699	3.53472	8.16176	8.06745	4.88941	5.03033	3.83018
GSM1607928	346	1	MALE	50	III-IV	T4	N2	A	8.16291	8.01206	4.2814	4.53839	4.76934	7.1826	6.62937	8.05651	5.14642	7.01819	9.55228	8.44815	5.43361	9.06569	4.85462	3.17056	2.53727	5.12512	8.80814	5.05114	4.43398	5.05641	7.38408	9.03758	4.72456	6.12868	4.78818
GSM1607929	596	0	MALE	38	III-IV	T2	N2	B	6.4553	8.14008	7.01744	5.39231	6.79843	8.09647	6.95862	7.64108	3.64948	6.14618	9.71746	8.30179	5.54994	8.60217	7.26941	2.08663	3.41497	5.58943	7.99176	6.99994	6.55217	3.42904	7.61529	8.25912	3.80813	5.73555	4.53161
GSM1607930	590	0	MALE	50	III-IV	T4	N0	A	7.46464	10.0675	4.55363	4.13181	4.61884	8.18662	7.00075	9.6128	3.96694	7.91547	10.0025	8.30711	4.93466	9.24006	3.97698	3.72294	3.70671	4.95875	8.37509	5.9234	5.05534	4.52702	7.734	8.25562	4.43236	5.02595	4.52926
GSM1607931	596	0	MALE	42	III-IV	T4	N2	A	8.02804	6.25703	3.93252	5.12938	4.24265	2.98042	7.23108	7.5174	4.3315	7.92279	10.4211	9.56539	5.95347	8.12042	4.21199	3.44221	2.11639	6.53048	8.41353	6.72799	4.00795	4.85174	8.88817	9.24163	3.77638	4.87323	5.94015
GSM1607932	358	1	MALE	71	III-IV	T2	N2	B	7.66174	7.7073	6.71909	4.56608	6.23634	4.51233	6.03573	9.12372	3.41039	6.18127	10.5617	8.29119	5.49929	7.3005	6.19221	2.29671	2.2611	5.29617	7.17479	6.5579	4.97005	4.08291	8.19268	9.24792	4.22106	5.60879	4.86406
GSM1607933	590	0	MALE	52	I-II	T2	N0	B	7.24017	6.96323	4.6597	4.83537	5.06441	7.20881	6.44967	7.88068	4.03995	7.18558	9.67607	8.50973	5.74274	9.08591	4.41634	3.76725	1.99035	5.85352	7.13521	5.12245	5.57238	6.03801	7.6601	8.39217	3.66076	5.39244	5.44446
GSM1607934	582	0	MALE	54	I-II	T1	N0	A	8.79955	6.89851	4.15552	4.2605	4.42235	5.95562	6.35806	7.44359	3.68938	5.41754	10.1284	8.8586	5.05487	8.12559	4.05339	2.11222	2.30124	6.21595	8.20555	5.94041	4.3826	4.11542	8.02909	9.26325	4.17009	4.57786	4.84198
GSM1607935	581	0	MALE	59	III-IV	T3	N1	B	6.2945	7.62	8.52622	6.47265	7.74077	7.56512	7.32303	7.58982	3.08637	5.32891	9.2933	7.72803	4.87031	8.0234	7.35956	2.33557	3.65881	5.12369	7.15743	6.39402	7.51317	3.21919	7.2109	7.86215	4.20712	5.21887	4.28799
GSM1607936	553	0	FEMALE	73	III-IV	T1	N2	A	7.81055	10.1367	3.86564	4.38151	4.72173	5.51429	6.63929	9.53485	4.61627	7.52814	9.96726	8.49811	4.85471	9.24006	4.17574	3.49945	1.87576	5.09939	8.55326	5.40192	4.51522	4.69739	7.48318	8.49747	4.06342	5.26702	3.82203
GSM1607937	574	0	MALE	52	III-IV	T1	N2	A	8.32575	6.17367	5.88173	4.64903	3.52536	6.24481	5.5602	8.91962	3.52033	6.36944	9.62987	8.7961	6.01266	9.11854	5.12565	5.57152	3.57324	6.10905	9.16079	6.10227	4.88375	4.94965	8.3368	9.73943	5.33727	5.289	4.37179
GSM1607938	605	0	MALE	56	III-IV	T2	N1	A	8.23527	7.2663	5.34056	5.17616	5.04457	8.46718	6.31939	7.1341	4.23969	8.37318	9.78563	8.45856	6.04219	8.78202	5.01564	3.61877	2.28532	5.64812	8.17043	6.44367	5.5366	4.88401	7.52331	9.01509	4.11135	5.93463	5.23713
GSM1607939	603	0	FEMALE	55	III-IV	T4	N0	A	7.24952	7.83892	4.05569	4.97333	3.82613	9.35799	6.96793	7.54468	4.23055	5.81561	10.3623	8.78816	6.41364	7.48681	4.17369	2.97079	2.63605	5.36902	7.91791	3.96482	4.05314	3.86218	6.70011	8.59133	4.40213	5.57529	4.92291
GSM1607940	582	0	MALE	54	I-II	T2	N0	A	7.28198	6.35178	3.1812	4.40191	5.29237	9.56287	7.06045	8.82951	4.32955	7.19595	9.91466	8.63198	6.54158	8.8833	3.74159	3.9171	2.83724	5.14788	6.55947	6.05946	3.45813	4.03015	7.65182	8.6405	5.15847	4.91347	3.96299
GSM1607941	577	0	MALE	46	III-IV	T2	N2	A	7.31513	7.83362	4.6462	4.73469	5.88861	7.37165	6.12116	7.4272	3.96491	5.22886	9.55228	8.7961	6.62226	8.5048	4.04088	2.3216	3.14877	6.29901	8.53532	5.97959	4.62307	4.91339	8.44862	8.31922	3.89153	5.81161	5.65874
GSM1607942	20	1	MALE	73	III-IV	T3	N2	A	7.86768	6.25387	3.79728	5.21935	4.37798	7.11992	6.1248	9.13783	4.42096	7.28582	9.9481	8.24669	5.70537	7.3839	4.075	3.71476	4.2082	5.18839	7.2004	5.9527	4.05041	5.53032	8.47589	8.8661	3.71294	5.12805	4.62828
GSM1607943	566	0	MALE	48	III-IV	T4	N2	A	7.21229	7.27441	5.09141	4.92246	4.88069	6.88889	6.90287	7.8839	3.25097	7.34849	10.0743	8.75335	5.76984	9.81287	4.2568	3.17453	3.37597	6.40618	8.27386	6.55856	4.59	3.93551	8.3442	7.65368	4.32867	5.6555	5.17513
GSM1607944	596	0	MALE	43	III-IV	T1	N1	B	7.15485	8.86301	5.11901	4.9586	4.60006	7.62758	6.21072	8.4635	4.35578	7.46478	9.31836	8.72454	6.31236	8.62407	7.53315	3.37584	3.02684	5.51636	8.32061	4.85822	5.74347	4.65367	7.70142	8.2573	5.18502	4.82981	5.06734
GSM1607945	672	0	MALE	58	III-IV	T4	N2	A	7.56513	7.38064	5.53008	4.68169	4.73822	6.031	6.01742	8.24876	3.56336	5.97619	10.4497	9.17127	6.11933	8.33712	4.20718	3.68901	1.9684	6.02424	8.55326	6.57205	4.63126	4.42406	8.23496	8.32103	4.12646	5.12375	5.04697
GSM1607946	552	0	FEMALE	64	III-IV	T4	N2	A	8.0238	7.91518	3.87581	4.5596	4.34176	7.58717	6.57508	9.09096	4.40217	7.77181	9.66366	8.24289	4.7913	8.58523	3.73543	3.74988	3.03189	5.61191	8.09841	5.44443	3.66013	4.4141	7.68791	8.9836	4.25977	5.0504	4.04692
GSM1607947	549	0	MALE	45	III-IV	T4	N2	B	6.78268	6.42557	7.94318	5.11397	5.8166	8.55907	6.1572	7.66584	3.62372	5.93463	10.0712	7.5719	4.91994	7.61956	6.9107	3.2484	3.20018	4.96495	6.95649	5.21586	6.46412	3.48146	7.04569	7.4344	3.56515	5.14649	4.0808
GSM1607948	546	0	FEMALE	45	III-IV	T4	N0	B	6.89301	8.84312	5.28898	4.43861	7.09504	8.14527	5.93482	7.28102	4.26849	4.13461	10.3935	8.72454	5.60236	7.83037	8.21082	1.94586	3.30856	5.82502	8.22794	7.33883	5.55201	3.76873	7.68791	8.3062	4.01395	6.0626	4.78281
GSM1607949	563	0	MALE	51	I-II	T2	N0	A	8.09476	8.6081	5.34056	5.33271	4.91001	8.2866	6.06721	7.91321	3.83312	7.32723	10.2002	8.29785	5.88134	8.48668	4.76594	5.30649	3.38406	5.30551	8.60946	6.75817	4.85516	4.44463	7.68898	9.23235	4.51342	5.31259	4.39453
GSM1607950	623	0	MALE	52	I-II	T2	N0	A	7.44628	8.08718	3.96158	5.03136	4.14353	8.46718	6.1392	9.98589	4.39369	7.35859	9.54053	8.84674	5.25732	9.46646	4.51432	3.14901	2.64373	5.66342	7.50227	4.99908	4.3022	5.00655	7.8991	8.94831	3.85983	5.51315	4.31614
GSM1607951	597	0	MALE	74	III-IV	T3	N2	A	7.80541	6.09267	3.57041	5.23825	5.15074	7.82552	6.58887	7.1112	3.6089	7.56354	9.89377	8.37797	5.78401	8.29784	5.30417	2.38113	1.96369	5.10678	8.04519	5.2684	4.40909	3.9543	7.4593	9.0347	5.26455	5.23996	4.77553
GSM1607952	11	1	MALE	59	I-II	T1	N0	B	9.48867	7.18884	3.9869	5.01498	5.26856	7.68853	6.28063	7.25069	3.36294	5.07335	9.53071	9.02265	6.74435	8.41946	4.21172	2.15177	2.31587	6.22007	8.34291	5.22671	6.82182	4.73521	7.87181	9.75223	5.11188	5.55878	5.5267
GSM1607953	577	0	MALE	61	I-II	T2	N0	A	7.66649	9.54015	4.31251	4.36959	4.45028	7.01273	6.72658	9.69278	4.44636	7.44202	10.2148	8.68322	5.40408	9.45775	4.02444	3.57207	3.34293	5.40304	7.18932	6.32514	5.21905	4.72229	7.93344	8.4448	3.77694	4.83664	4.62781
TCGA-4P-AA8J	102	0	MALE	66	III-IV	T2	N2	B	8.05206	7.97895	5.15226	4.84119	6.09945	4.72406	6.59323	7.31605	3.82049	6.94847	10.2679	8.51068	5.62998	8.0568	5.65136	3.13825	2.72085	5.45693	7.5936	6.63482	4.81703	3.75368	7.96485	9.06352	4.11155	5.17648	4.31496
TCGA-BA-4074	462	1	MALE	69	III-IV	T2	N2	A	6.31723	6.82692	4.04389	5.53494	4.0574	4.90057	5.48559	5.04684	4.19008	5.37178	10.9997	10.1779	6.11071	8.86481	4.27818	4.24904	2.3748	7.24491	8.75508	8.66475	5.54579	4.89044	9.22903	9.85089	3.90933	5.0315	4.78924
TCGA-BA-4075	283	1	MALE	49	III-IV	T3	N0	A	7.24509	6.48534	4.66468	4.77061	3.48213	6.59585	6.45401	6.12201	3.89872	4.24134	11.6253	9.85871	6.00758	8.47638	3.83831	3.29215	2.31386	6.57712	9.10606	7.42656	4.90063	4.63366	8.52596	9.0723	3.86481	4.78645	4.49126
TCGA-BA-4076	415	1	MALE	39	unknow	unknow	unknow	A	7.43365	8.23753	2.74368	4.76784	4.18802	7.30803	6.43956	7.60171	4.06066	6.46755	10.2258	8.97428	5.59375	9.2517	2.81488	3.04903	2.45002	5.94132	7.98387	6.48719	3.55506	5.39534	7.70168	8.57956	4.00274	5.17176	4.11792
TCGA-BA-4077	1134	1	FEMALE	45	III-IV	T4	N0	A	7.41035	8.79077	3.97316	4.9755	4.97034	7.38291	6.89739	7.96337	4.6323	7.02932	10.7172	8.96408	6.69132	8.64591	4.70518	3.04903	2.37377	6.09552	7.79289	6.514	5.16301	4.70348	8.01315	8.23174	4.29474	5.387	5.73981
TCGA-BA-4078	276	1	MALE	83	unknow	unknow	unknow	A	7.34429	5.76832	5.2105	5.78406	4.69806	7.48229	6.47242	8.38452	4.59702	5.29073	9.63984	8.84606	6.67844	9.05663	4.987	3.49933	2.787	6.51854	8.98171	6.62032	5.18685	3.32719	8.30632	8.84586	5.26042	6.15279	5.68757
TCGA-BA-5151	722	0	MALE	72	III-IV	T4	N0	A	7.58772	9.15288	4.63324	4.50672	4.1626	6.99984	6.35825	8.60012	4.27583	7.11371	9.76614	8.58693	5.41136	8.29218	3.7967	3.17803	2.28151	5.17445	8.35372	5.88585	5.01203	5.51002	7.46604	8.20094	4.54532	4.8945	4.82547
TCGA-BA-5152	1288	0	MALE	56	III-IV	T4	N0	A	7.64549	10.5877	3.91238	4.94941	5.6755	7.7805	5.75779	7.81185	4.19192	7.65643	9.41179	9.04172	5.68502	8.75816	3.8533	3.04903	2.29785	5.88331	8.27415	5.86314	5.05127	4.72483	7.2574	8.79955	3.87809	4.91056	5.53818
TCGA-BA-5153	1762	1	MALE	51	unknow	T2	unknow	B	6.62551	7.18315	5.14887	5.22898	5.59159	10.0725	7.03317	9.50023	4.4071	6.88746	9.96419	8.32575	6.6602	8.55678	9.34182	3.04903	2.71581	6.00042	7.75772	4.80449	5.91153	4.06493	7.96166	8.56787	4.77001	5.67338	5.6209
TCGA-BA-5555	520	0	MALE	54	III-IV	T3	N2	A	7.80104	7.39989	4.58028	4.9843	5.49652	4.9541	7.37074	8.63715	4.01523	7.78234	10.5897	8.72298	6.14233	8.39368	4.39272	3.17696	2.88943	5.73589	7.73092	6.3932	5.17155	5.03902	7.48798	8.9942	5.06759	5.37402	5.3726
TCGA-BA-5556	725	0	FEMALE	58	I-II	T2	N0	A	7.65632	8.91818	5.53571	4.38525	6.14023	7.10857	6.54515	9.55769	4.02656	7.737	9.96353	8.5439	5.29091	8.02558	3.56052	3.04903	2.30045	5.27762	8.0991	7.18949	5.66355	4.69681	7.59365	8.08953	4.4847	5.03501	5.01703
TCGA-BA-5557	623	0	FEMALE	41	III-IV	T1	N1	B	7.29966	10.0956	4.26855	3.76226	5.02354	8.79597	6.0531	8.98064	3.28506	7.63448	9.74463	8.06273	5.07304	8.07856	6.50922	3.04903	2.51214	4.73259	7.76493	5.36766	4.68653	4.55569	6.92086	7.80791	3.8572	4.42565	4.3233
TCGA-BA-5558	1995	0	MALE	65	unknow	unknow	unknow	A	8.05282	9.24999	4.80425	4.2581	5.17213	7.45692	6.70547	9.05164	3.93369	7.40816	9.50344	8.69247	5.73654	8.16461	3.73548	3.11112	2.23488	5.24067	7.774	5.39811	4.52793	4.53779	7.69094	8.23985	4.37387	4.82185	4.9343
TCGA-BA-5559	2083	1	MALE	71	unknow	unknow	unknow	B	7.53345	4.95586	6.23126	5.59574	6.85761	4.71533	6.70787	8.61412	4.2461	6.31969	9.27776	8.59737	6.53063	8.11441	7.33943	3.26286	4.55443	6.03477	9.00553	5.35581	6.74706	3.65865	7.51384	9.03687	4.73449	5.4833	5.6155
TCGA-BA-6868	472	1	MALE	53	unknow	unknow	unknow	A	7.73244	7.26675	5.10488	4.62184	3.36584	6.35269	7.00866	8.75751	4.28973	5.12278	10.2869	8.58106	5.73463	7.59656	3.564	3.14941	2.16364	5.56349	8.33269	6.64017	3.23146	4.07562	7.81658	8.51061	4.05907	4.61193	4.83198
TCGA-BA-6869	644	0	MALE	62	III-IV	T3	N0	A	7.73339	8.91738	3.06805	5.22295	5.62157	9.57194	6.21306	7.91972	3.78391	7.42136	10.0173	8.66336	5.09812	8.09486	3.84661	3.58691	2.61315	5.69756	8.13654	7.71501	4.02362	3.54002	8.03254	8.57311	4.37576	5.07923	4.84829
TCGA-BA-6870	451	1	FEMALE	60	unknow	unknow	unknow	A	7.3051	6.91545	3.91924	4.04672	4.92807	6.41627	6.95385	8.08496	3.86037	6.61004	10.0415	7.63684	5.24079	7.97133	3.72397	3.16398	2.22757	4.60303	7.04792	6.25186	4.8877	4.0299	7.28236	8.18456	3.6511	4.56791	4.19054
TCGA-BA-6871	108	1	MALE	75	unknow	unknow	unknow	B	9.75187	5.98051	6.36034	6.0472	6.02518	4.39483	7.08393	6.72399	4.00296	7.18706	9.48898	9.52255	6.44618	8.47558	6.96837	3.10534	3.7219	6.31043	9.10463	5.60379	5.37347	4.4096	8.48941	10.8953	4.65349	5.35098	4.7866
TCGA-BA-6872	384	1	MALE	47	unknow	unknow	unknow	A	7.45733	7.75209	4.92318	4.47642	4.36572	6.19952	6.11722	8.13989	3.36702	6.30668	10.184	8.67586	5.5198	8.16899	4.21829	3.04903	2.28283	5.01804	8.21941	6.35419	3.94512	4.14011	7.95082	7.9753	3.91306	4.96508	5.19397
TCGA-BA-6873	122	0	MALE	28	III-IV	T4	N2	A	8.37927	6.90471	5.26595	4.90787	4.78418	7.15356	7.1538	9.07045	4.31509	5.70827	10.0512	9.01773	5.98557	8.17203	4.59586	3.17652	2.48513	5.76571	7.94715	5.53383	4.30686	5.10961	8.18878	9.41753	4.73345	5.64226	5.68266
TCGA-BA-7269	1273	0	MALE	61	III-IV	T2	N1	A	6.86491	6.89367	5.11499	4.08465	5.1541	7.8879	4.53115	6.55669	3.78261	6.63551	10.1203	8.2253	4.12948	8.6229	4.10829	3.04903	3.12168	5.24411	8.62339	6.38808	3.92034	3.79165	7.60746	9.91283	4.2028	5.23143	3.35273
TCGA-BA-A4IF	895	0	MALE	59	unknow	unknow	unknow	A	7.17288	8.28253	3.97663	5.32359	4.37703	7.65986	6.91595	8.26528	4.00638	6.36644	10.2472	9.03202	5.76565	9.0814	3.88768	3.56664	3.01923	5.8222	8.47308	6.01374	4.37756	5.46801	8.00157	8.90507	4.45926	5.36594	5.06123
TCGA-BA-A4IG	855	0	MALE	77	unknow	T1	unknow	A	7.35519	8.53179	4.21939	5.48771	4.77688	7.76268	6.93105	8.03823	4.14391	7.30898	10.1179	9.04504	6.75144	9.42957	4.45906	3.48091	2.24677	6.32	8.23004	6.17997	4.83505	5.35852	8.39368	9.16113	4.76667	5.56637	5.39257
TCGA-BA-A4IH	622	0	MALE	57	unknow	T2	N1	B	7.39072	9.03349	6.21728	5.74033	5.39699	9.48013	6.86782	7.14734	4.66943	5.73631	9.55607	8.65822	6.5488	8.45307	6.65946	3.04903	2.51014	6.20953	8.69069	6.32948	5.80759	4.56844	8.40803	9.1127	4.82176	6.14666	5.3577
TCGA-BA-A4II	918	0	MALE	46	I-II	T2	N0	A	7.46037	7.87148	5.46133	4.93071	4.74395	9.08489	7.30467	7.46497	4.73128	7.88365	10.2453	8.85612	5.0645	9.05417	3.53546	3.32391	2.61055	5.83333	8.15914	6.59599	4.72009	5.64752	8.00024	8.58031	4.54262	5.39646	4.86223
TCGA-BA-A6D8	850	0	MALE	59	III-IV	T4	N2	A	7.82476	5.12749	3.8611	4.67181	5.76928	6.83712	5.29587	6.61205	2.56093	8.06483	11.0007	8.11452	5.0786	9.44783	5.09748	4.5376	2.52278	5.65562	8.39537	5.83269	3.71513	2.98146	7.92532	10.1353	4.18317	5.07554	3.63824
TCGA-BA-A6DA	351	0	FEMALE	41	III-IV	T4	N2	A	6.64658	8.70474	2.23325	3.22353	4.09723	5.96361	4.32331	6.79514	2.82356	7.16461	9.48456	7.39706	4.24434	8.72865	3.45696	3.19414	2.14986	4.63746	6.07727	5.48255	2.39307	2.77157	6.71615	8.27039	3.17603	4.04468	3.49398
TCGA-BA-A6DB	216	0	FEMALE	24	I-II	T1	N0	B	6.97945	9.16388	5.81261	5.04665	5.80807	7.74526	6.32484	8.02521	3.60897	7.49388	9.70124	8.35404	5.00704	9.21727	6.24875	3.04903	4.09276	5.36171	7.45843	5.37164	6.54837	3.94508	7.91007	8.70569	4.13689	5.61907	4.01752
TCGA-BA-A6DD	173	1	MALE	44	III-IV	T4	N2	A	7.06482	8.39182	4.93728	4.46603	5.75856	6.31334	6.08375	7.02549	3.59575	7.49263	10.2343	8.61128	5.67594	8.80657	4.23059	3.04903	2.41963	5.72066	7.40904	7.17552	5.42368	4.03269	7.77625	8.68534	3.89319	4.99667	4.36129
TCGA-BA-A6DE	440	0	FEMALE	70	I-II	T2	N0	A	7.09762	7.47488	3.83616	5.2222	4.8049	10.477	6.50365	8.00199	4.65813	5.99908	10.2675	8.95352	5.4201	8.75846	3.20433	3.04903	2.62162	5.67337	8.17968	5.78658	4.24753	4.39597	7.97517	8.05974	5.08555	5.75635	4.2585
TCGA-BA-A6DG	69	1	MALE	49	unknow	unknow	unknow	B	8.18947	7.24458	5.75557	4.893	5.27759	5.39962	6.52169	7.60192	3.90952	5.23548	9.82654	8.26737	5.58606	8.00406	5.83373	3.25287	2.76829	5.35751	7.32264	7.02202	4.98128	3.89411	7.71112	8.75294	3.93483	5.27519	4.36717
TCGA-BA-A6DI	336	1	MALE	62	unknow	unknow	unknow	A	7.46189	7.53562	4.06396	4.98269	4.52241	10.5138	6.77187	8.59618	4.0708	6.04911	9.81222	8.3896	5.50246	8.22938	4.22106	3.16225	3.23594	5.36516	7.60404	6.54487	4.82722	4.21885	7.65788	8.8026	4.49153	5.4962	4.26888
TCGA-BA-A6DJ	407	1	MALE	62	III-IV	T4	N2	A	7.29029	8.95132	3.9177	4.60416	5.02759	8.64278	6.23789	7.88562	3.74509	7.43495	10.1522	8.80942	5.73656	8.65595	3.08972	3.04903	2.25324	5.56056	7.79727	5.89277	4.69271	4.57351	7.48752	8.46309	3.90362	5.27463	4.67319
TCGA-BA-A6DL	623	0	MALE	59	unknow	T0	N0	A	7.08983	9.84304	3.42565	5.36447	5.85643	6.05609	5.75426	7.75623	4.17725	6.40258	9.98729	9.10704	5.43207	8.3485	3.26989	4.34029	3.20541	5.75056	8.00434	6.58059	3.91961	3.79495	7.9806	8.73467	4.34975	5.46895	4.13778
TCGA-BA-A8YP	499	0	MALE	50	III-IV	T4	N3	A	7.95271	5.61767	5.27737	5.20097	4.64753	9.88746	6.52086	7.58771	4.25835	6.65286	10.1458	8.34684	6.63994	9.72643	5.67586	3.38297	2.39821	5.69497	8.63009	5.99457	5.18357	4.40207	8.01131	9.14529	5.26636	5.76448	5.30186
TCGA-BB-4217	187	0	MALE	68	III-IV	T4	N2	B	7.6899	8.32991	6.34527	4.90862	6.57955	7.47784	6.41068	8.08863	4.10265	6.99132	9.97694	8.82869	5.96348	8.26823	5.68196	3.10645	2.39092	5.56484	7.64803	6.30957	6.869	4.6168	7.6209	8.60804	4.18183	5.49834	5.01511
TCGA-BB-4223	3221	0	MALE	48	III-IV	T2	N2	B	7.20245	6.6919	5.35799	5.93937	5.77387	6.98107	5.96863	9.01025	4.88302	6.67898	9.17588	8.97869	6.78988	8.6808	7.05616	3.35443	3.36702	6.55045	10.1159	5.44665	6.03157	3.84469	7.8009	8.85063	4.76606	5.83606	5.70156
TCGA-BB-4224	278	0	MALE	52	III-IV	T2	N2	A	7.63961	6.99451	2.05209	5.8019	3.72326	7.5608	6.9797	7.21057	4.29378	7.34836	10.4432	8.78871	6.69824	10.1999	4.54	3.18836	2.6398	6.33633	7.94007	4.65928	3.24532	4.8979	8.2686	9.66822	4.16384	5.496	5.34057
TCGA-BB-4225	146	0	MALE	73	unknow	unknow	unknow	B	6.78978	6.06652	4.04752	5.47731	6.20266	10.3671	6.00594	6.55947	4.11114	7.03947	9.13776	8.54264	6.53712	8.24848	8.20551	3.04903	2.40783	6.25574	9.61162	5.62404	5.4564	3.89911	7.60544	8.7029	4.74115	5.61607	5.35671
TCGA-BB-4227	134	0	MALE	66	III-IV	T4	N2	A	7.63564	7.74217	2.66364	4.99417	3.36493	6.64925	6.75673	8.31133	3.80045	6.4856	10.1332	8.62987	6.18236	9.17858	3.00738	3.12814	2.46758	6.16974	8.35345	6.90668	3.9753	4.16253	7.94026	8.74969	4.52467	5.01735	4.84306
TCGA-BB-4228	559	0	MALE	50	III-IV	T3	unknow	B	6.81338	7.4102	3.93555	5.47716	4.65664	8.63612	6.40878	8.02054	4.36531	7.89028	10.073	8.94791	6.51143	8.70534	8.28505	3.04903	2.69257	6.30779	10.7863	4.14626	4.81361	4.36569	8.23021	8.91294	4.55508	6.20465	5.77621
TCGA-BB-8596	2161	0	FEMALE	69	III-IV	T4	unknow	B	7.30281	8.39274	6.42564	5.1513	5.759	8.6151	6.43446	8.87835	4.68579	6.75167	10.0879	8.12749	5.65013	8.16029	7.27519	3.30319	3.7159	5.45522	7.63713	6.64605	6.03201	4.27239	7.7567	8.13093	4.73592	5.87097	5.26535
TCGA-BB-8601	624	0	MALE	84	III-IV	T3	N1	A	7.62368	7.21621	2.63124	5.40761	3.2316	6.23241	5.68827	7.21272	3.63757	6.21032	10.2469	8.8702	6.16802	9.47893	3.18623	4.45306	2.40536	6.23831	8.53969	6.237	3.6437	4.87183	8.69006	9.16597	4.97065	6.02063	4.46797
TCGA-BB-A5HU	782	0	MALE	47	III-IV	T4	N2	A	8.08936	8.25975	5.4947	4.59224	4.91596	6.00052	6.28491	8.89831	3.89668	6.24242	9.95965	8.88977	5.56013	7.95886	4.40833	3.19478	2.32429	5.62371	8.30858	6.22454	3.64973	5.84327	8.03564	8.52516	4.6919	5.36348	5.41362
TCGA-BB-A5HY	321	1	MALE	64	III-IV	T3	N2	A	7.67783	5.99594	3.06332	5.57435	4.57273	7.12792	7.26593	6.97838	3.6079	3.50541	10.4709	9.25541	6.74449	8.00397	3.24073	3.12748	2.90369	6.39354	9.26192	5.70697	3.54129	4.77604	8.67318	9.22168	3.40231	4.42772	4.77273
TCGA-BB-A5HZ	827	0	MALE	65	III-IV	T4	N1	A	7.45431	8.17967	4.63081	4.78137	3.56826	7.57334	6.21555	8.04622	4.1206	7.72919	9.2157	8.72841	4.7597	9.23398	3.54517	3.04903	2.66864	5.04749	8.20012	5.66139	3.87539	4.84128	7.64334	8.55831	4.28117	5.24664	4.14328
TCGA-BB-A6UM	393	0	MALE	52	III-IV	T1	N2	A	7.35775	9.5442	3.54478	5.49182	5.60861	7.88245	7.24964	8.13253	4.22998	8.01666	10.7679	8.43024	6.70023	9.25767	4.7275	3.04903	2.45651	6.13125	7.54017	5.39384	4.94211	3.99674	8.4117	9.23615	3.85273	6.00765	5.19257
TCGA-BB-A6UO	268	1	FEMALE	61	III-IV	T4	N2	A	8.02154	7.44698	4.71326	4.52825	3.86157	6.31695	6.21029	6.88459	3.7353	6.43016	9.8751	9.05551	5.55392	8.46167	3.8418	3.13386	2.21828	5.91875	7.78323	6.34025	4.37355	4.06686	7.87765	8.84108	4.05824	4.89046	3.77385
TCGA-C9-A47Z	191	1	FEMALE	72	III-IV	T2	N1	A	7.71437	7.96369	3.2794	4.584	3.61447	5.64176	6.70324	8.58833	3.94982	6.96516	9.24114	8.72776	5.48105	8.93517	2.8615	3.04903	2.44145	5.27658	7.14933	5.33088	3.5604	4.58456	7.63163	8.03446	4.22929	5.27435	4.06107
TCGA-C9-A480	386	0	FEMALE	45	III-IV	T3	N0	A	7.49859	7.59323	3.60396	4.83145	3.88612	7.2533	6.48683	8.57276	3.26432	7.39902	9.52718	8.43485	5.33938	8.45786	4.3147	3.04903	2.67163	4.95489	7.9973	5.54542	4.14424	5.15855	7.492	8.03237	3.88136	5.06135	4.56094
TCGA-CN-4722	1483	0	FEMALE	61	I-II	T2	N0	A	6.66327	8.1424	5.53808	4.17485	4.03711	5.98496	5.82519	8.63265	4.00853	8.19612	9.22879	8.25425	4.30566	8.93319	4.36765	3.04903	2.39305	4.65495	8.1295	5.42741	5.30301	4.60346	6.94419	7.90598	4.30395	4.51165	4.3182
TCGA-CN-4723	1699	0	MALE	67	III-IV	T4	N0	A	7.94744	6.85686	4.28299	4.88099	5.11717	6.42969	6.65667	8.42381	4.66468	5.65319	9.58857	9.12834	5.92331	8.04997	4.72499	3.18363	2.68142	5.96039	8.53446	6.27073	4.37978	4.97106	8.05079	8.23144	4.83589	5.28587	4.82672
TCGA-CN-4725	1157	0	MALE	60	I-II	T2	N0	A	7.22355	7.34249	4.45859	4.96343	3.50639	5.56056	6.16495	8.80478	3.84944	6.28049	9.85479	9.28559	6.28822	8.44938	3.40271	3.04903	3.55281	6.12296	8.29475	5.87214	4.62899	4.91027	7.67787	8.77246	4.78358	5.09124	5.42803
TCGA-CN-4726	142	1	MALE	68	III-IV	T3	N2	A	7.10871	8.51615	4.3356	4.10982	3.30554	4.52147	6.01052	7.93415	4.2443	7.57044	9.80352	7.7948	4.69479	9.00683	4.01897	3.11688	2.40828	5.38924	7.56801	5.6356	3.85912	4.61208	7.44419	8.10995	3.63522	4.59631	4.17826
TCGA-CN-4727	1560	0	MALE	56	III-IV	T4	N0	A	7.11707	7.57748	3.95298	5.06083	3.4425	6.98461	6.03522	7.96588	4.61435	5.45025	9.98158	8.53737	6.03896	8.36294	3.43451	3.43362	2.43131	6.59306	8.22558	6.48081	3.18791	5.09513	8.08894	8.53428	4.07179	4.64797	5.05324
TCGA-CN-4728	1724	0	MALE	56	III-IV	T3	N2	B	7.33375	7.49359	6.76072	5.01637	6.01451	7.46499	5.80792	8.88712	4.46876	4.77076	9.73062	7.88406	5.97332	8.346	7.56042	3.19221	2.93879	5.02092	7.98306	5.29956	5.78003	4.54151	7.52984	8.28798	4.51062	5.33357	4.78353
TCGA-CN-4729	392	0	MALE	73	III-IV	T2	N1	A	7.59169	9.10875	5.50076	4.17173	4.75856	8.44666	6.67554	8.19482	3.64603	6.49999	9.87565	8.68235	5.25799	8.21824	4.51231	3.28229	2.4763	5.59402	7.84277	5.38158	4.99198	4.58723	6.95267	8.35872	4.34848	5.07562	4.24623
TCGA-CN-4730	817	0	MALE	62	III-IV	T4	N1	A	6.61862	7.34727	4.06182	5.07013	3.11443	7.58913	5.95992	7.97349	4.00951	5.89173	10.1899	9.14547	5.25125	8.19809	3.26952	3.10356	2.38889	5.96992	8.83644	5.02136	3.49047	4.74111	7.81486	8.72544	4.01212	5.04637	5.23264
TCGA-CN-4731	998	1	FEMALE	63	III-IV	T4	N2	A	7.11739	7.39757	3.96274	4.83835	5.0423	6.32376	6.33786	9.13509	3.85458	5.66667	9.73606	8.74259	5.12738	7.17906	4.24877	3.04903	2.34555	5.92237	8.19129	7.24626	3.08477	3.87568	7.86165	8.6287	4.03873	5.10737	3.71887
TCGA-CN-4733	1586	0	MALE	61	III-IV	T1	N1	B	6.48241	5.60096	7.12472	4.14662	6.16404	9.90783	6.24633	7.94487	3.61996	5.20732	9.76257	7.87114	4.84487	7.11075	4.72063	3.10734	3.19678	5.10206	8.01644	5.83118	6.36658	4.08657	7.76254	7.80441	3.99819	4.64085	4.57087
TCGA-CN-4734	1690	0	MALE	70	I-II	T2	N0	A	7.92887	8.45962	3.72886	4.49676	4.81921	9.16359	6.03482	8.63977	4.05119	7.56872	9.69168	9.27096	5.59174	7.81534	3.86216	3.17415	2.2813	5.47068	7.79325	5.82311	5.17462	4.68335	7.04239	8.56518	4.36569	4.57668	4.85259
TCGA-CN-4735	1737	0	MALE	52	III-IV	T3	N2	B	7.40178	5.73358	4.1593	5.67776	5.82395	8.19217	6.03591	8.21625	4.61257	6.04002	9.19391	8.58243	6.53854	8.10867	7.3001	3.47429	2.51564	6.21445	8.75988	6.46333	5.19663	3.88909	8.24414	8.32618	4.90309	5.77245	5.46955
TCGA-CN-4736	395	1	FEMALE	70	unknow	T1	unknow	B	7.60659	6.67877	6.32722	4.99448	5.47414	8.39943	6.33121	8.18959	4.23997	7.04252	9.96858	8.47212	5.26665	7.83327	6.80291	3.19585	5.27234	5.69514	7.70594	6.34778	6.37183	4.88831	7.93782	8.43246	4.42191	5.23474	4.88911
TCGA-CN-4737	625	0	MALE	19	III-IV	T2	N2	B	7.2216	7.67867	5.6049	5.04497	4.20564	8.63933	6.66884	9.56462	3.84742	6.25904	9.52715	8.71449	5.5476	7.66729	5.83683	3.04903	3.56611	5.62595	8.05629	5.2746	5.53621	4.81472	7.664	8.27928	4.76483	5.67949	4.04278
TCGA-CN-4738	436	1	MALE	53	III-IV	T4	N0	A	8.54189	8.21389	5.5472	4.7795	5.17885	9.72906	6.23267	9.74544	4.36288	6.30623	9.86814	8.51095	5.39105	7.58014	5.03029	3.04903	3.27221	5.29989	7.9718	6.62739	5.06954	4.61628	7.7339	8.65453	4.58817	5.1152	4.51098
TCGA-CN-4739	1394	1	MALE	71	III-IV	T4	N0	A	7.56893	8.08759	4.56064	5.07534	5.40177	5.03059	6.90364	8.43909	4.3184	6.76134	9.52568	7.69958	5.79582	8.23776	4.61255	3.04903	2.5083	5.64991	8.10544	5.58701	4.94974	4.00755	7.4098	8.19807	4.54422	5.01501	5.40307
TCGA-CN-4740	839	1	FEMALE	79	III-IV	T4	N0	B	7.13286	7.88547	7.76712	5.0167	5.5898	7.97308	5.40429	8.86884	4.71571	6.7141	9.53457	8.68078	5.17661	8.31667	7.22904	3.10867	4.30959	5.34006	8.558	5.6185	5.91565	4.89853	7.34468	8.15314	4.51908	5.00245	5.22006
TCGA-CN-4741	2239	0	MALE	75	III-IV	T4	N0	A	7.55129	8.2561	4.35517	5.37445	4.15047	9.85228	6.73885	8.48414	4.6027	7.66401	9.76137	8.57485	6.50485	9.36737	4.53706	3.16095	2.27693	5.77079	7.86269	6.92916	4.04691	5.0484	7.97478	8.22635	4.62819	5.23834	5.55194
TCGA-CN-4742	397	1	FEMALE	48	III-IV	T4	N2	A	7.88183	9.38443	6.25454	4.13153	4.5985	5.68237	6.37258	8.64298	3.89412	4.8824	9.94101	8.45652	5.51586	8.14614	4.77882	3.04903	2.30921	5.11608	8.07167	5.57127	5.47087	4.73386	7.36165	7.98478	4.12286	4.6877	5.26763
TCGA-CN-5355	1278	0	MALE	64	III-IV	T4	N0	A	7.5837	7.84274	5.84014	4.6054	4.52225	8.41998	6.52402	9.01941	4.20118	5.78423	10.0779	8.67946	6.01343	8.40947	4.83862	3.11821	2.55781	5.62599	8.17312	5.32128	5.61181	5.29592	8.04254	8.76108	4.73476	5.26491	5.00603
TCGA-CN-5356	1409	0	MALE	56	III-IV	T3	N0	A	7.30628	7.54596	5.37363	5.20221	4.54887	4.91064	6.99623	8.77822	4.33233	6.76756	10.6773	9.19165	5.69575	8.30063	4.51603	3.21565	3.44924	5.73809	8.85111	6.3201	5.78962	5.22206	7.38352	8.10455	5.70426	5.41781	5.3165
TCGA-CN-5358	261	1	MALE	60	I-II	T2	N0	B	6.94709	8.12195	8.31334	4.54889	5.89562	8.98973	6.32836	8.60546	4.27052	5.19012	9.45846	7.89362	5.12705	7.52241	6.20837	3.04903	3.42322	5.09389	6.9742	5.37689	6.18841	4.43667	7.18388	7.7806	3.98187	4.9295	4.26809
TCGA-CN-5359	377	1	MALE	59	III-IV	T4	N2	B	8.12647	8.51611	6.14167	4.89984	5.88969	5.67176	6.59114	8.73961	4.27194	7.05324	9.71389	8.33905	5.37005	8.47811	5.62523	3.40824	2.44438	5.27298	9.03295	6.36851	5.5616	5.6191	7.34422	9.10174	4.76052	5.46383	4.92949
TCGA-CN-5360	2169	0	MALE	68	III-IV	T4	N0	B	7.29671	7.79383	6.19922	5.41669	6.35421	6.41364	6.27403	8.76225	4.1453	6.35874	9.55874	8.05039	5.87977	8.72656	6.3011	3.49352	4.03138	5.51713	7.3626	5.23794	6.73531	4.17386	7.60094	8.06859	5.31482	5.44217	4.80349
TCGA-CN-5361	2120	1	MALE	80	III-IV	T4	N2	A	8.41753	6.43224	5.77238	5.23186	5.50177	5.07794	7.40836	9.77739	4.7143	6.14073	10.6585	8.59116	6.29975	8.01977	5.27055	3.04903	2.81144	5.88058	7.96909	6.03125	5.25354	4.51402	8.23765	8.7357	4.80945	5.60764	4.55172
TCGA-CN-5363	253	1	MALE	48	III-IV	T4	N3	A	7.88544	4.98917	4.4677	5.30215	5.05252	4.67428	6.88268	9.38364	4.18769	4.09659	10.2707	8.99346	6.21926	7.78858	4.16249	3.04903	2.86404	6.18382	8.3381	6.33498	5.14271	4.44219	8.93226	8.97346	4.86651	5.5214	5.55339
TCGA-CN-5364	493	1	MALE	55	III-IV	T4	N2	A	7.67156	9.36883	4.83168	4.98479	4.78404	7.14533	6.29191	9.19142	4.19895	8.61667	9.60674	9.2994	5.85312	8.42982	5.75866	3.18083	3.45134	5.67203	8.40622	6.09927	4.51877	3.37739	8.26047	8.67323	4.71354	5.39087	5.45311
TCGA-CN-5365	351	1	MALE	38	III-IV	T2	N3	A	6.89946	6.84278	2.96692	5.05285	4.69011	5.84839	6.65496	8.32154	3.59534	8.06519	11.2032	8.68355	5.62792	8.44403	3.71144	3.15769	2.56931	5.22647	7.78556	6.73246	3.86039	4.17019	8.04622	7.85201	4.35607	5.14654	4.57161
TCGA-CN-5366	360	1	MALE	51	III-IV	T4	N2	A	8.07996	7.55325	4.01457	4.89878	4.70078	5.09432	7.07378	9.07345	4.05798	6.12753	10.17	8.68484	5.61944	7.69778	4.43886	3.04903	2.49126	5.61822	8.35247	6.30898	4.43093	4.29735	7.94681	8.86358	4.44436	5.72274	4.96693
TCGA-CN-5367	352	1	FEMALE	60	III-IV	T4	N2	A	7.43713	6.70076	3.96895	5.14271	4.10989	6.28935	7.02001	7.83813	4.72574	5.18506	10.1364	8.99173	5.84556	7.73449	4.7015	3.17652	2.7384	5.98473	7.89278	6.37445	3.82626	5.18933	8.35766	8.19899	4.96678	5.28074	5.74052
TCGA-CN-5369	1	1	FEMALE	90	III-IV	T4	N0	B	7.45962	8.7463	5.83076	4.55579	5.51809	6.95754	6.10278	8.43365	4.10331	6.38048	10.0789	8.56439	5.68381	8.38827	4.73311	3.04903	2.4966	5.16755	7.5489	6.1631	5.44556	4.68588	7.47449	8.03919	4.22159	5.01226	4.64329
TCGA-CN-5370	259	1	MALE	78	III-IV	T3	N1	B	7.94007	6.97718	6.48921	5.08174	5.67151	8.9571	6.96608	8.22378	4.48287	6.14754	9.79699	8.87371	5.92261	8.38345	5.01368	3.16463	3.71865	5.87011	8.0327	6.22101	5.98133	5.22008	7.94923	8.28246	4.4167	5.20752	5.13377
TCGA-CN-5373	1584	0	FEMALE	55	I-II	T1	N0	B	7.17165	8.62405	4.61898	4.36182	5.30218	8.1856	6.76651	9.53896	4.09386	8.51073	9.22447	7.92234	4.99694	8.42574	5.83215	3.04903	2.41356	4.79308	7.15068	5.40198	4.81951	4.9639	7.13063	7.63902	4.16259	4.83812	4.46929
TCGA-CN-5374	1732	1	FEMALE	56	III-IV	T2	N2	B	6.97103	10.0579	4.8897	5.22864	5.73217	4.34431	6.8387	8.57006	4.36795	6.37127	9.94577	8.34248	6.34281	8.05308	5.15309	3.27714	2.95669	5.5899	8.32615	4.63926	5.63373	3.95739	8.21188	8.72644	4.12242	5.73667	5.31688
TCGA-CN-6010	1523	0	MALE	53	III-IV	T4	N2	A	7.88153	6.00397	6.24237	5.17022	5.07931	5.16875	6.05462	8.99841	3.97712	7.3148	9.51986	8.62133	5.76349	8.02599	5.1077	5.24658	3.22294	5.75836	8.32614	5.76127	5.13053	4.67889	8.09212	8.33586	5.19411	5.35099	4.7503
TCGA-CN-6011	933	0	MALE	57	III-IV	T4	N0	A	7.67006	7.92452	3.88621	4.9321	4.30721	4.69032	6.54468	9.37713	3.56455	5.25089	10.1021	8.59279	5.70905	7.74907	3.74785	3.16029	2.16924	5.87582	7.87735	6.96575	3.73561	4.28134	7.78581	8.276	3.75392	4.94256	4.67773
TCGA-CN-6012	1460	0	MALE	66	III-IV	T3	N2	B	7.43688	7.03603	4.42286	5.07474	5.28348	6.28638	6.15515	8.36069	3.86662	6.80638	9.55204	8.07541	5.47179	8.86492	5.41875	3.18363	2.55363	5.39399	8.18745	6.18039	5.04979	4.04574	7.38625	8.00467	5.0082	5.26757	4.48997
TCGA-CN-6013	727	1	MALE	56	III-IV	T4	N2	B	7.9043	7.81006	4.16496	4.47508	6.60958	9.74301	6.99174	8.70376	4.076	8.03852	9.71637	7.76467	5.40949	7.70483	5.19375	3.04903	3.08302	4.93832	7.46666	6.07262	4.97233	4.34732	7.22717	8.07088	4.37031	5.0106	4.36254
TCGA-CN-6016	1443	0	MALE	64	III-IV	T4	N1	B	7.51367	6.60884	6.29839	4.42887	5.46833	6.39825	6.16857	9.11417	3.82164	8.14197	9.29093	7.68183	5.13887	7.69623	7.01967	3.04903	3.70169	4.99121	7.14159	7.07019	5.08586	4.35832	7.08031	8.06011	4.22352	5.22629	4.47973
TCGA-CN-6017	853	1	MALE	55	III-IV	T3	N2	B	6.7027	5.81485	7.14452	4.18858	6.19494	6.90832	6.10465	8.28277	3.68213	4.15451	9.17541	7.8624	4.73008	7.0877	5.58278	3.12108	5.5341	5.17085	7.07597	5.74295	6.46863	4.34931	7.16629	7.62476	4.11001	4.8303	4.26078
TCGA-CN-6018	580	1	FEMALE	85	III-IV	T4	N2	B	7.79247	6.60878	6.55541	4.89353	5.13077	8.50292	6.85104	9.01115	3.72875	5.2333	10.0795	8.8214	6.43251	7.62402	6.05527	3.04903	3.10225	5.93861	8.25474	6.29475	5.02388	5.14967	8.09988	8.74047	4.80894	5.27096	5.07094
TCGA-CN-6019	1038	0	MALE	61	III-IV	T4	N0	B	7.4285	8.04544	6.45449	4.95791	6.02202	9.72637	6.61649	8.88758	4.08336	6.38298	10.1052	7.80258	5.25847	9.01188	7.89377	3.39907	3.05082	5.42565	7.91048	5.63853	6.0884	4.14079	7.58107	8.51242	4.58093	5.21885	4.4382
TCGA-CN-6020	205	1	MALE	58	III-IV	T2	N1	A	7.75328	9.85892	5.42325	4.5084	5.17587	8.88576	6.86857	9.16666	4.24347	5.82847	10.1079	8.48776	5.74292	8.2047	5.08374	3.12064	2.16689	5.32885	7.97841	6.9119	4.53492	5.0808	7.66265	8.11734	4.46139	5.07502	4.74566
TCGA-CN-6021	276	1	FEMALE	63	unknow	unknow	unknow	A	6.94359	8.20612	4.66891	4.84841	4.53741	5.34199	5.65274	7.89066	3.53039	8.45905	10.043	8.30038	5.176	9.55512	3.71415	3.30156	2.94941	5.5871	7.8635	5.62048	4.97445	3.796	7.70282	8.5022	4.87472	5.36476	4.00814
TCGA-CN-6022	281	1	MALE	49	III-IV	T4	N1	B	8.15299	7.30305	4.85884	5.06159	5.60752	4.46755	6.85119	8.3494	4.21871	7.14406	10.7346	9.16316	6.3806	8.10417	6.02596	3.04903	3.44563	5.90764	8.56937	6.77267	5.46686	5.17751	8.22887	8.6287	4.63311	5.53596	4.38625
TCGA-CN-6023	1584	0	MALE	73	III-IV	T3	N2	B	7.76921	5.11633	5.74187	5.69793	5.67354	4.71168	6.72465	7.15407	3.86984	6.12767	9.81825	8.76548	6.44674	9.01315	7.72431	3.75744	2.37696	5.90661	9.32113	6.20882	5.50509	4.55485	8.48214	8.69423	5.70582	6.1211	4.81022
TCGA-CN-6024	337	1	MALE	66	III-IV	T4	N2	A	8.49255	7.37787	3.95103	4.87071	3.54493	9.08243	5.86918	8.39955	4.39691	7.17626	9.52039	8.10895	6.11972	8.71893	4.30655	3.96684	2.91054	5.23259	8.67215	6.29715	3.3265	5.17593	7.87249	9.47898	4.8886	5.91474	4.83444
TCGA-CN-6988	318	0	MALE	47	III-IV	T4	N2	A	7.8381	9.88312	3.40695	5.39738	4.91211	5.74196	6.58747	8.58402	5.0321	5.40548	9.65657	8.32094	6.00258	7.81092	3.57051	3.16181	2.41229	5.27309	8.90529	5.36711	2.90737	4.82965	7.60823	8.69774	5.012	5.94806	4.55811
TCGA-CN-6989	980	1	MALE	64	III-IV	T3	N2	B	7.67946	8.27109	6.71061	5.36351	6.38371	7.2482	6.87034	8.8304	4.1002	5.98762	10.4345	8.85124	6.08002	8.75589	6.87589	3.68355	3.3431	5.78887	8.0116	5.49389	5.3942	5.18854	7.87222	8.43167	4.85862	5.7214	5.48193
TCGA-CN-6992	1066	0	MALE	61	III-IV	T3	N2	A	7.64651	7.07724	3.69066	5.51358	4.54093	4.53077	6.63749	7.98204	3.8652	7.3707	9.87962	8.73035	5.65783	9.27236	5.35366	3.9896	2.62459	5.98655	9.10409	6.79366	4.6928	4.51701	8.10419	8.40888	5.23025	5.464	4.39896
TCGA-CN-6994	1183	0	MALE	67	III-IV	T4	N0	A	8.45667	7.94836	5.073	4.87166	4.42708	7.55034	6.80981	9.30109	4.29771	8.7647	9.54947	8.04809	5.82017	8.50806	5.33942	3.49802	2.46306	5.34488	8.92564	6.74958	4.25328	5.34141	6.84553	8.72951	4.87716	5.50871	4.15313
TCGA-CN-6995	112	1	MALE	78	III-IV	T4	N0	A	7.825	7.26042	4.1903	4.94268	5.62677	6.34525	7.18524	8.04408	3.89229	8.0134	10.1185	8.8061	5.93435	8.2264	4.74534	3.11533	2.42934	5.94939	8.13579	8.47826	5.41065	4.26119	8.14561	9.05232	4.46284	5.272	4.84088
TCGA-CN-6996	530	1	FEMALE	58	III-IV	T3	N2	B	7.27823	6.83194	5.77475	4.7696	6.15249	7.12443	6.87476	8.8509	4.32994	5.58781	9.89306	8.61569	5.81597	7.70144	4.72378	3.11356	3.44879	5.76172	7.47511	5.50902	5.65869	4.70528	7.80893	8.12988	4.58332	5.30696	5.23297
TCGA-CN-6997	988	1	MALE	66	III-IV	T3	N2	A	8.14532	5.94409	4.44386	5.84644	3.94345	7.26415	6.06841	9.04112	3.91334	7.93284	9.34043	8.84061	6.41833	8.39958	5.24804	4.40676	2.28657	6.1913	8.68216	5.99872	4.6877	5.32252	8.15625	8.40401	5.34055	5.80597	4.50808
TCGA-CN-6998	357	1	MALE	53	III-IV	T3	N2	A	7.8544	10.1213	2.83361	3.95187	3.83358	8.62578	6.02212	8.63096	3.51697	7.18725	9.63306	8.50308	4.98399	8.4155	3.58212	3.09195	2.43229	4.88159	7.29575	6.34	4.00749	5.09586	7.28498	7.94361	4.17629	4.71682	4.11895
TCGA-CN-A497	1065	0	MALE	63	III-IV	T1	N1	B	7.8399	7.20419	5.04327	5.63892	6.20425	8.94827	6.7283	8.21699	3.4653	5.99301	9.78357	8.37374	5.41756	7.96279	5.97361	4.15131	2.88592	5.67281	8.22306	5.32756	4.82672	3.98776	8.16747	9.23546	4.90797	5.31007	4.93649
TCGA-CN-A498	773	1	FEMALE	61	III-IV	T3	N0	A	7.42896	8.27791	3.05486	4.97231	4.05711	9.97196	6.67461	8.77757	3.95153	7.52001	9.58153	8.31296	5.50038	8.35436	6.07091	3.12307	2.25739	5.46604	7.36756	5.80249	4.62848	5.04833	7.91138	8.30194	4.21758	5.29974	4.90227
TCGA-CN-A499	717	0	FEMALE	60	I-II	T2	N0	A	7.64655	7.74349	4.31314	5.50318	5.76793	5.71791	6.69682	8.70462	4.25564	6.69118	10.2865	9.06359	6.61278	7.54015	4.13871	3.29154	2.46931	6.12378	8.30732	6.60153	5.33979	4.88282	8.33633	8.63888	4.69034	5.38721	5.47467
TCGA-CN-A49A	526	1	MALE	60	III-IV	T4	N0	A	7.5458	7.57738	5.39067	5.68586	4.0451	7.17096	6.82547	8.17306	4.31499	6.19954	9.78052	8.7835	6.37314	10.3701	4.51166	3.04903	2.4648	6.02194	8.12364	6.378	5.8671	5.0083	8.34518	8.56162	4.80377	5.46062	4.8117
TCGA-CN-A49B	904	0	MALE	71	III-IV	T3	N1	A	8.07147	7.58189	3.89213	5.00721	5.88603	8.79909	6.69551	7.71881	3.78804	6.99226	10.5419	8.73229	6.75113	7.90599	4.44366	3.27342	2.2637	5.98976	7.76731	6.89749	4.16588	4.61825	8.15306	8.88647	4.1956	5.42319	4.84394
TCGA-CN-A49C	645	0	MALE	67	unknow	unknow	unknow	A	7.29028	8.64278	3.40789	5.23632	4.84499	4.85726	6.71717	7.22347	4.3584	8.13011	9.82716	8.47567	6.55284	9.37186	4.91449	3.04903	2.25656	6.15645	7.55195	7.04519	4.48082	4.23521	8.39862	9.01747	4.07313	5.84444	5.19467
TCGA-CN-A63T	225	0	MALE	60	III-IV	T3	N2	A	7.64814	9.3995	4.51832	5.15348	6.86243	6.99751	6.03718	7.73119	3.95963	7.41422	9.65943	9.00098	5.5278	8.30597	4.44979	3.54767	2.7267	5.47883	8.25795	6.13868	4.63063	3.87637	7.85388	9.15419	4.14016	5.32062	4.39928
TCGA-CN-A63U	964	0	MALE	50	III-IV	T3	N2	B	7.14383	8.05568	3.76848	5.86454	6.92601	7.14945	6.90473	7.0921	3.5758	6.16695	10.1453	8.57019	5.61726	9.70625	6.6462	3.38337	2.86615	5.87118	8.31497	3.30547	3.62764	4.3893	9.06244	9.20569	4.67276	5.71432	4.6047
TCGA-CN-A63V	679	0	MALE	59	III-IV	T4	N0	A	8.04114	6.81316	6.93774	4.88011	4.33765	5.64619	6.23677	7.79905	3.44469	4.48953	9.81761	8.21737	5.53382	8.19354	5.44096	3.19607	2.20588	5.29479	8.22227	6.19192	4.42189	4.46601	7.53282	8.40769	4.23259	5.27555	4.53257
TCGA-CN-A63W	377	1	FEMALE	48	III-IV	T4	N2	A	7.36573	8.55186	3.13429	5.41974	4.35199	6.15484	6.14618	7.95304	3.52425	6.00491	9.87946	8.84404	5.4088	8.12906	3.46628	3.17286	2.41383	5.25007	7.70794	6.22708	3.51689	3.92162	7.45486	8.67979	4.05975	5.41621	4.38258
TCGA-CN-A641	367	0	MALE	47	III-IV	T4	N2	A	6.76467	9.25493	2.95927	5.34735	3.99387	6.51906	5.93864	7.05143	5.0027	6.53412	9.9604	8.91348	6.19341	8.66206	3.71334	3.47467	2.54417	5.61447	7.9016	4.76232	3.80695	4.33895	7.38157	8.774	4.05096	5.5105	5.00232
TCGA-CN-A642	82	1	MALE	57	III-IV	T4	N3	A	8.14577	6.0561	3.8521	5.6347	5.08319	4.72602	6.65025	7.81172	3.41671	4.94269	9.98	9.22514	5.84149	7.91156	3.88408	3.75091	2.82135	5.67963	8.35901	6.65206	5.76541	4.72947	8.00168	9.12125	4.43031	5.90753	4.72286
TCGA-CN-A6UY	713	0	MALE	57	III-IV	T3	N2	B	6.28577	7.28951	5.43927	4.98123	6.73595	3.64775	6.07145	6.56934	3.1644	7.70665	9.95527	8.17867	5.83022	9.00517	9.3628	3.1288	2.71896	5.81543	9.85408	4.63282	4.93716	3.01821	8.41783	9.49962	3.68214	5.66823	4.55941
TCGA-CN-A6V1	603	0	MALE	59	III-IV	T2	N2	B	6.02395	6.98813	5.13309	4.95051	7.71591	4.12258	6.21878	6.64855	3.12409	6.88878	10.0443	8.14186	5.58577	9.66898	7.15572	3.04903	2.66747	5.32121	7.29318	6.2968	6.18213	2.72736	7.74551	8.88151	3.48689	5.6443	4.24751
TCGA-CN-A6V3	742	0	MALE	61	III-IV	T3	N2	A	7.42508	8.48848	3.60121	5.08973	4.86933	6.21066	6.4903	8.76418	4.01068	7.03467	9.79904	8.94727	5.73815	7.88215	3.95133	3.04903	3.48763	5.65517	8.16967	6.73393	4.41715	4.04116	7.7779	8.42524	4.39152	5.28934	4.98134
TCGA-CN-A6V6	635	0	MALE	59	III-IV	T2	N2	B	6.69133	8.32566	4.85653	5.55466	6.00072	9.95266	6.66757	8.05463	4.14259	7.35967	9.8502	8.34267	6.46776	8.75199	5.49969	3.22369	3.35064	5.99752	7.24838	4.99773	6.07231	3.75932	7.76134	8.99179	4.07154	5.66281	5.24096
TCGA-CN-A6V7	594	0	MALE	40	III-IV	T2	N2	A	7.14422	6.06152	2.56009	5.74343	4.51078	9.73352	6.16946	8.13495	3.39767	7.2253	9.21571	8.85126	6.74476	9.13013	2.92705	3.04903	2.45476	5.88013	8.78848	6.24628	3.95365	4.23637	8.27341	9.07433	4.41209	5.91582	5.34579
TCGA-CQ-5323	1466	0	MALE	82	I-II	T1	N0	A	7.46584	7.55341	4.90559	5.08945	4.67029	6.73594	6.77212	8.50789	3.91932	7.0413	9.70464	8.47959	6.32301	8.70974	3.7163	3.04903	2.3283	5.74418	8.10229	5.49275	4.6018	4.9947	7.64668	8.30267	4.78961	5.37341	5.51179
TCGA-CQ-5324	1593	0	MALE	59	III-IV	T3	N0	A	7.83376	9.10113	4.62206	4.47122	4.45909	8.26338	6.22075	8.83889	4.2055	7.35109	10.2988	8.70552	5.26131	8.53486	4.52717	4.1691	2.16049	5.43415	8.94804	6.27756	4.38345	5.47477	7.56764	8.37985	4.75164	5.04135	4.85818
TCGA-CQ-5325	654	1	MALE	65	I-II	T1	N0	B	6.97293	7.08023	6.30507	4.59197	5.8057	4.9359	5.96673	8.52651	4.41183	6.30403	9.6007	8.40511	5.31093	7.9515	5.15483	3.04903	4.27858	5.51508	7.21714	6.29173	6.15506	4.57223	7.66312	8.12517	3.85305	4.78671	4.72843
TCGA-CQ-5326	89	1	MALE	67	III-IV	T4	N2	A	7.55513	9.2459	5.05445	4.8842	4.12302	5.91417	6.65259	9.32288	4.5465	4.34944	9.99165	8.91536	5.96016	7.53355	4.23149	3.04903	2.19237	6.02616	8.40639	6.31569	3.67225	4.86824	8.11714	8.21462	4.86782	4.9848	5.62954
TCGA-CQ-5327	1660	0	FEMALE	61	III-IV	T3	N2	A	8.04185	8.6738	4.14911	4.54054	5.23456	4.97233	6.18089	8.33477	3.75853	6.20775	9.76451	8.81311	5.54903	8.58601	4.07113	3.04903	2.27988	5.15111	8.39592	6.4284	5.29737	4.55884	7.76543	8.49119	4.19259	4.97447	5.04982
TCGA-CQ-5329	2143	0	FEMALE	46	I-II	T2	N0	A	7.94865	6.91745	5.42022	4.97307	5.30836	5.52934	7.40955	7.7812	4.30241	6.04174	10.6994	9.60855	5.94819	7.98864	4.55548	3.04903	2.27529	6.33114	8.70738	6.56484	5.53705	5.06571	8.13049	9.23688	4.12697	5.49463	5.2868
TCGA-CQ-5330	1897	0	FEMALE	69	III-IV	T3	N2	B	7.99924	5.68951	6.21591	4.6912	5.77691	5.6295	6.69141	8.97472	4.20107	5.80894	10.1048	8.83149	5.74585	7.662	4.86801	3.04903	3.8071	5.79521	8.88992	6.93229	5.69726	4.58888	8.15572	8.74595	4.75101	5.51482	5.31963
TCGA-CQ-5331	1399	0	FEMALE	73	unknow	T2	unknow	A	7.19506	8.69497	5.48257	4.39269	5.55418	6.57625	6.51794	8.16334	3.83505	7.50757	10.0086	8.56066	5.10442	9.03472	3.57274	3.1321	2.28404	5.09627	7.79393	5.31854	5.26582	5.47426	7.44911	8.3551	4.139	5.02812	4.61267
TCGA-CQ-5332	317	1	MALE	87	III-IV	T3	N0	A	8.44569	8.89008	3.35258	5.26379	4.67025	6.67878	5.74998	8.00478	4.15719	7.00794	9.64111	8.6977	6.06402	9.44671	5.11844	3.34443	2.37743	6.04267	9.1451	6.04147	4.15158	4.88384	7.97979	9.15188	5.07503	5.77385	4.65883
TCGA-CQ-5333	341	1	MALE	74	I-II	T2	N0	B	7.83593	4.53912	4.41219	4.85354	6.88182	3.81643	6.5802	7.85803	3.46538	7.05588	10.3164	8.53391	5.30603	8.28581	4.62331	3.04903	3.99082	5.46078	7.42373	6.01166	5.44547	3.46987	8.04334	8.83626	3.92474	5.15418	4.69224
TCGA-CQ-5334	129	1	MALE	87	III-IV	T3	N2	B	7.75284	6.99968	5.86904	4.80541	5.89613	4.43154	6.99405	8.97823	4.20453	7.76784	10.5711	8.36517	5.83866	8.44893	4.39878	3.04903	2.23171	5.22592	8.28224	5.60727	5.82462	4.84518	8.05416	8.31902	4.59772	5.22223	5.82086
TCGA-CQ-6218	1253	0	FEMALE	52	III-IV	T3	N2	A	7.35591	7.87521	4.75157	4.30175	4.6277	7.86286	6.16272	8.11459	3.69717	6.98975	9.66941	8.49	5.23885	8.25697	4.84517	3.15268	2.33531	5.36663	7.33715	5.46826	4.58863	4.9497	7.56311	8.30459	3.89163	4.66891	4.40109
TCGA-CQ-6219	479	1	FEMALE	50	III-IV	T3	N2	B	7.11115	6.43767	6.11221	4.92028	5.59328	7.1381	6.85121	8.50898	4.19421	6.58835	10.394	8.59491	5.60619	8.1849	6.16967	3.04903	2.33356	5.80399	9.73243	7.57574	5.64958	5.03561	8.27796	9.19825	4.60793	5.58748	4.97942
TCGA-CQ-6220	985	1	MALE	69	III-IV	T3	N0	A	7.53396	9.2615	3.63128	4.28048	4.01833	7.3836	6.40319	8.58994	3.63965	6.90523	10.0224	8.56686	5.96062	8.13834	3.33336	3.04903	2.29725	5.4188	8.63266	5.8896	4.56879	4.73395	7.9181	8.51113	3.412	4.59704	4.7085
TCGA-CQ-6221	1000	0	MALE	79	unknow	T2	unknow	A	8.51761	4.19003	8.77962	4.92633	4.40085	7.44449	5.70768	6.39919	4.70238	2.86085	9.75916	8.09703	5.69031	7.64499	6.34471	3.04903	2.20827	5.80925	7.18565	5.67594	4.31783	3.43267	8.17374	9.35412	3.95285	5.3085	5.32543
TCGA-CQ-6222	2016	0	MALE	63	III-IV	T2	N2	B	6.87615	8.99575	5.59921	4.31337	5.62059	6.37874	5.58822	8.28687	3.29873	7.17898	9.06793	7.76521	4.79654	8.53776	7.2419	3.10334	5.68072	5.21585	7.09394	6.55998	5.40965	4.36523	7.29175	8.03058	3.91149	4.87024	4.00359
TCGA-CQ-6223	1428	0	MALE	69	I-II	T2	N0	A	7.8096	9.452	4.17697	4.1985	4.49764	9.26771	6.40313	8.88742	4.27933	8.35989	9.1326	8.17533	5.33757	9.19626	4.345	3.04903	2.19204	5.18258	7.14172	6.36759	5.54323	4.8005	7.21654	8.10607	4.46018	4.94487	4.28195
TCGA-CQ-6224	1721	0	MALE	52	III-IV	T2	N2	B	7.45288	5.48185	6.391	5.01138	5.30697	5.06707	6.59741	8.49668	4.24593	5.26635	10.0969	8.90009	5.48219	7.74867	5.14796	3.04903	2.71945	5.71306	8.03904	5.67475	5.35209	4.48884	7.92631	8.63276	4.04462	5.17298	5.00339
TCGA-CQ-6225	403	1	MALE	65	III-IV	T3	N0	A	7.92147	9.1248	2.16554	5.31827	3.70399	6.03257	5.93086	8.2895	4.22922	6.4074	9.58218	8.58321	5.48516	9.03812	3.3485	4.66336	2.32967	5.8814	8.51391	6.87444	3.48255	4.40921	8.18812	8.63164	4.78665	5.89539	4.17145
TCGA-CQ-6227	129	1	MALE	77	III-IV	T3	N2	B	7.83744	8.08203	6.768	4.68229	4.63562	6.67257	6.29667	8.66535	4.28438	6.05138	9.84032	8.94148	5.65448	7.95209	5.17481	3.04903	4.30633	5.61729	7.93178	5.86301	6.04289	4.28359	7.93329	8.39378	4.2796	5.23244	5.0183
TCGA-CQ-6228	456	1	FEMALE	71	III-IV	T1	N2	A	7.50729	8.10836	5.46338	5.62425	4.16732	7.53913	6.75406	7.90461	3.65366	6.47473	9.94112	9.17648	5.65191	9.00135	5.16352	4.92755	2.52517	6.07105	8.77998	5.86065	5.77191	4.80983	8.53028	8.88293	5.17793	6.02191	4.70343
TCGA-CQ-6229	1179	0	MALE	61	I-II	T2	N0	A	7.14565	7.53038	4.22215	4.51461	4.43083	5.89869	6.60264	8.38026	3.86108	7.64441	9.80606	8.87096	5.02188	8.73879	4.17874	3.09754	2.99409	5.4832	7.996	5.93299	4.58645	4.38476	7.90101	8.62138	4.08464	5.2271	4.64579
TCGA-CQ-7063	2133	0	FEMALE	59	I-II	T1	unknow	B	7.83856	8.17505	3.72618	4.35928	5.84417	10.4558	6.41855	8.88446	3.86546	7.93701	9.55889	8.52884	5.16703	8.13501	4.76889	3.04903	2.27672	5.01722	7.68976	6.11271	5.3915	4.87678	7.50861	8.12621	4.14012	4.91507	4.89901
TCGA-CQ-7065	1628	0	MALE	40	I-II	T2	N0	A	7.52517	7.70315	2.61666	4.58743	2.12672	6.46481	7.00602	8.69533	4.41421	7.38995	9.8358	8.39127	5.05364	8.60312	2.87887	3.1089	2.48444	5.31627	7.26283	4.03794	3.23818	3.97167	7.91854	8.48148	4.15903	5.13337	4.45098
TCGA-CQ-7068	1309	0	FEMALE	80	I-II	T2	N0	A	7.78136	7.39384	3.37469	4.84246	5.96525	5.73926	6.57712	8.4002	3.90484	7.65973	10.122	8.67031	5.72556	7.42377	3.24289	3.16702	2.36359	5.54404	7.96181	7.40011	5.47887	5.07679	7.83256	8.51463	4.32777	5.4117	4.9884
TCGA-CQ-7069	1274	0	FEMALE	77	I-II	T2	N0	A	7.92579	8.32199	5.22623	4.52512	4.49316	7.84274	6.86144	9.34307	4.07965	7.7745	10.3231	8.51772	5.59254	7.72616	5.51065	3.04903	2.75446	5.09597	7.49672	5.68852	4.50006	5.44332	7.62209	7.99661	4.67328	5.50527	4.64618
TCGA-CQ-7071	1311	0	FEMALE	76	III-IV	T2	N1	A	7.05645	9.37923	3.52329	4.75271	4.80107	7.99585	5.88416	8.37842	4.05186	6.54226	9.43573	8.51215	5.21542	8.69921	3.61013	3.04903	2.22629	5.25795	7.16136	5.50197	4.32275	4.68346	7.295	8.14241	3.92185	4.86271	4.23816
TCGA-CQ-7072	2359	0	MALE	51	I-II	T2	N0	B	7.22525	6.66624	5.62033	5.81142	5.87472	6.38953	6.58853	8.42611	4.37626	3.32572	9.54912	8.15738	5.48007	7.91029	6.36615	3.04903	2.63605	5.44041	7.57637	7.09368	5.33192	4.21568	7.35514	8.45272	4.50911	5.80132	4.09519
TCGA-CQ-A4C6	1353	0	MALE	63	I-II	T2	N0	A	7.35439	6.83125	4.84445	4.53372	5.33169	6.81982	6.66997	8.32499	4.13648	6.74125	10.2456	8.70057	5.78747	8.25267	4.36659	3.26721	2.929	5.35188	7.76666	5.43314	4.82705	4.7036	7.91213	8.29606	4.35832	5.21458	5.05118
TCGA-CQ-A4C7	353	1	MALE	88	III-IV	T3	N1	A	7.96727	7.19535	5.56373	4.86651	4.69721	8.26605	6.86318	9.43149	4.32293	5.4757	10.211	9.11375	6.26803	7.75287	4.8556	3.04903	2.55709	6.01032	8.24495	6.94649	4.95883	4.65801	7.84432	8.89542	4.08561	5.62382	5.12667
TCGA-CQ-A4C9	707	0	MALE	56	III-IV	T2	N1	A	7.46937	9.58502	5.9815	5.42473	4.6176	8.2988	6.43033	7.66477	4.10304	7.80233	10.0835	8.64464	6.15267	8.79116	5.10084	3.22644	2.72705	5.87769	8.37561	5.7354	5.01512	4.61917	7.8818	8.42795	4.96336	5.59216	4.90555
TCGA-CQ-A4CB	893	0	MALE	59	III-IV	T1	N1	A	7.72828	7.70108	6.51724	5.33218	5.22439	7.61985	6.69275	8.68429	4.65432	5.10391	10.3324	9.23902	6.39055	7.62507	5.61885	3.14154	2.58604	6.18636	7.96544	6.99966	5.08508	5.02999	8.39009	8.74271	4.463	5.61272	5.71412
TCGA-CQ-A4CD	1022	0	MALE	69	III-IV	T4	N0	A	7.90475	8.91849	4.13806	4.61953	4.89088	8.0202	6.49241	7.88981	3.97261	6.46445	10.497	9.11267	6.0402	7.19834	3.41069	3.21268	2.40115	5.87355	8.0369	6.6795	3.48151	4.35173	7.5672	8.60011	3.85203	5.15177	4.95732
TCGA-CQ-A4CE	897	0	FEMALE	76	I-II	T2	N0	A	7.11412	7.85541	4.37603	4.59052	4.247	7.61113	5.82545	7.82545	4.04351	6.85012	8.88347	8.32949	4.92753	8.44507	3.33654	3.11156	2.30693	4.89516	7.83305	4.84005	4.31689	4.46929	7.62836	8.1051	4.44464	4.93266	4.33181
TCGA-CQ-A4CG	430	1	FEMALE	78	III-IV	T3	N0	A	8.11884	6.96972	6.86622	5.08521	2.91362	8.73496	6.56482	9.1012	4.48869	6.8855	9.97315	9.01895	6.16567	7.40324	3.40159	4.17579	2.19708	5.83184	8.98798	7.44709	3.41556	5.41922	8.14357	8.3704	4.93031	5.06611	5.10455
TCGA-CQ-A4CH	379	1	MALE	58	I-II	T2	N0	A	7.82296	8.12864	5.20614	5.23486	4.59129	6.76901	7.1851	8.4397	4.06705	7.20734	10.2838	8.69461	6.36924	8.11678	6.23793	3.04903	2.26225	5.44954	8.14116	6.2977	4.54812	5.1624	7.89263	8.73932	4.57893	5.67604	4.6071
TCGA-CQ-A4CI	950	0	MALE	73	III-IV	T2	N1	A	8.02869	7.01632	4.23218	5.77702	4.13701	6.36734	6.36514	7.79254	3.60411	7.32085	10.5941	9.40442	6.79434	8.71706	4.68093	6.36219	2.18026	6.58683	7.99434	5.71536	3.86577	3.64969	8.57247	9.59513	4.71737	6.27875	4.51917
TCGA-CR-5243	2562	0	MALE	51	unknow	unknow	unknow	B	7.41818	8.04629	5.36445	5.16082	5.37163	4.52851	6.83505	8.81312	4.67366	6.19791	9.71271	8.04932	6.32626	8.86999	8.83503	3.04903	2.53463	5.75578	8.89858	4.23026	5.4482	3.01274	7.99721	8.77052	4.56727	5.48229	5.47426
TCGA-CR-5247	358	0	MALE	48	unknow	unknow	unknow	A	7.83344	8.88683	5.23967	5.26903	3.07127	4.87002	6.38602	8.41696	4.30162	7.89878	10.2242	9.3868	5.9856	8.50543	4.74064	3.1365	2.34063	6.07211	8.29759	6.51252	3.67361	4.49735	8.43093	8.81445	4.69052	5.23965	4.68043
TCGA-CR-5248	1663	0	MALE	53	unknow	unknow	unknow	B	5.99728	7.49011	6.07815	5.28048	6.68202	5.12161	6.29285	8.16419	3.8648	7.35453	9.8071	8.22133	6.35692	9.22249	6.5934	3.04903	2.71672	5.75179	7.20828	5.23607	7.28636	4.11715	7.07609	8.86503	4.27727	5.51486	5.57772
TCGA-CR-5249	1152	0	FEMALE	35	I-II	T2	N0	B	7.01062	8.10389	4.994	5.11181	5.7926	7.10224	6.73631	8.78748	4.57644	7.82305	9.60932	8.08263	6.19649	8.96732	5.57508	3.04903	2.47302	5.56622	7.14455	6.29576	6.02975	5.01465	7.77785	8.19144	4.3068	5.39179	5.53983
TCGA-CR-5250	799	0	MALE	71	unknow	unknow	unknow	B	7.05239	8.74333	4.38552	5.12807	5.51088	8.88311	6.57865	8.7104	4.31701	7.93533	9.63477	7.94958	6.36198	8.00765	8.65133	3.04903	2.92806	5.7431	8.26892	4.99462	5.53904	4.10555	7.82885	8.34381	4.4036	5.84488	5.28629
TCGA-CR-6467	1777	0	MALE	59	III-IV	T2	N1	B	7.2029	6.85554	5.56294	5.86475	6.25671	6.39651	6.30861	7.60028	3.88452	5.68274	9.40018	8.34623	6.77337	8.28034	7.47981	3.2899	2.81383	6.43533	8.56252	5.89184	5.99856	3.77325	7.91079	8.73974	4.55988	5.85133	5.44545
TCGA-CR-6470	1521	0	MALE	38	I-II	T2	N0	B	6.95264	6.47091	5.93684	5.3184	6.46158	7.91178	6.45545	7.90166	4.51328	6.70409	9.29534	8.18671	6.25867	8.62609	6.4965	3.23507	2.92982	5.88067	7.62633	6.0878	6.07713	4.41169	7.79088	8.36787	4.33973	5.46588	5.26548
TCGA-CR-6471	1202	1	MALE	58	III-IV	T4	N1	B	7.35542	8.92659	5.92294	4.81788	5.70483	8.15873	6.89988	9.13523	4.21758	7.96215	9.75908	8.16426	6.20905	8.92529	5.20076	3.04903	2.15993	5.73667	6.94266	5.47463	5.4945	5.65209	7.42919	8.21752	3.80765	5.42826	5.31769
TCGA-CR-6472	1050	0	MALE	59	unknow	unknow	unknow	A	7.25448	5.69466	6.22876	5.77047	4.32286	6.61151	6.14426	8.58015	4.01888	8.28498	8.52075	8.55201	6.84794	9.48691	4.02667	3.21268	2.38406	6.11863	7.57412	4.11502	4.6917	4.89411	8.47329	8.97649	4.80008	5.86789	5.77605
TCGA-CR-6473	1125	0	MALE	68	unknow	unknow	unknow	A	7.78815	7.99283	4.94626	5.20507	5.36824	6.14515	6.98292	8.40426	3.69856	5.97947	10.3859	8.89235	6.77578	8.50169	5.94147	3.32573	2.31978	6.21568	10.8997	4.25556	4.06439	4.67594	7.68185	9.00792	4.38487	5.54906	5.93049
TCGA-CR-6474	564	1	MALE	51	III-IV	T2	N2	B	7.91177	8.25362	5.13698	4.67401	5.39001	9.14862	6.4261	9.49612	4.10198	6.86065	10.2828	8.71856	5.58674	7.4709	5.18673	3.15769	2.58886	5.49152	8.20354	6.74143	5.72314	4.75911	7.3702	8.34948	4.15086	4.86872	5.61783
TCGA-CR-6477	514	0	FEMALE	56	unknow	unknow	unknow	B	7.11663	7.5468	5.59067	4.90604	5.46466	5.77492	6.05601	9.14424	3.71795	8.38219	9.93734	8.58565	5.45246	8.70448	5.74567	3.50157	2.49397	5.06502	7.5939	6.20009	5.62243	4.86257	7.31862	8.66642	3.93577	5.13291	4.87938
TCGA-CR-6478	183	1	FEMALE	66	unknow	unknow	unknow	B	7.13478	7.27858	5.57549	5.07604	6.0417	5.21141	7.09729	8.82559	4.3193	6.42741	10.5977	8.52153	6.1344	8.01822	4.61119	3.10044	2.33093	5.86242	8.3024	7.76213	5.69929	5.00382	8.0171	8.21166	5.14224	5.30119	4.99092
TCGA-CR-6480	362	0	MALE	53	unknow	unknow	unknow	A	6.75501	8.70774	3.58944	5.09957	4.89765	8.53685	7.66784	9.0856	5.0202	7.08926	10.3967	8.16742	6.62125	9.55645	3.99018	3.04903	3.15535	6.02641	7.44499	6.90578	4.77666	4.88252	7.94565	8.65886	4.51195	5.79016	5.45678
TCGA-CR-6481	311	0	MALE	47	unknow	unknow	unknow	B	6.99869	7.59782	6.54329	5.02965	6.69167	4.19221	6.30312	8.00624	4.26135	7.90385	9.70304	8.12618	5.53679	8.67079	7.12178	3.13913	2.40427	5.61018	7.67553	5.80732	6.90171	4.40882	7.07554	8.23001	4.46115	5.27896	4.80249
TCGA-CR-6482	345	0	MALE	62	unknow	unknow	unknow	B	7.24398	7.28725	6.73158	5.421	6.52875	5.74604	6.46042	8.02114	3.90882	5.28955	9.25004	8.12383	5.88454	7.54139	5.85472	3.04903	2.82289	5.82023	8.21904	4.93875	6.54847	4.17989	7.41969	8.18921	4.93938	5.17865	5.35643
TCGA-CR-6484	354	0	FEMALE	67	III-IV	T4	N2	B	6.66088	9.32702	6.21071	4.58476	6.39456	8.30617	6.03062	8.14684	3.43579	5.57845	9.51647	8.29716	5.26568	8.25367	6.51192	3.11267	2.58479	5.51197	7.88556	7.59009	5.55816	5.00245	8.00781	7.5396	4.08926	4.51858	5.21851
TCGA-CR-6487	234	0	MALE	50	I-II	T1	N0	B	7.04112	3.62091	6.04085	5.11185	6.54328	7.17056	6.56801	7.44107	3.75291	5.69128	9.61672	8.19947	6.12221	8.5859	5.04777	3.19884	2.45555	5.82137	7.98543	6.73167	6.71156	4.45685	7.73977	8.37802	4.57219	5.02243	5.65928
TCGA-CR-6488	379	0	FEMALE	68	I-II	T2	N0	B	7.9946	8.41124	6.92209	4.77694	4.95967	8.34942	6.3951	9.64457	4.26017	7.37005	9.61905	8.27061	5.36926	7.83529	7.20873	3.49408	3.02323	5.186	7.42183	5.40237	5.0634	4.73482	7.22357	8.64797	4.3685	5.18595	4.85809
TCGA-CR-6491	693	0	MALE	60	III-IV	T4	N2	A	7.4612	9.27104	2.58567	4.15859	4.03506	4.73167	6.4551	9.11626	3.98201	6.84837	9.55646	8.4711	5.38446	8.36025	2.99668	3.04903	2.20415	5.23029	7.77568	5.02269	4.03558	3.69963	6.72397	8.11679	3.88336	4.85355	4.5127
TCGA-CR-6492	479	0	MALE	78	III-IV	T2	N1	B	7.54369	9.16881	5.39088	4.52168	5.18677	8.10726	6.44427	8.52044	4.2044	7.1154	9.68242	8.40012	5.47409	8.05706	5.41974	3.20354	2.5436	5.31348	7.74665	6.09502	5.07098	4.78019	7.41528	8.28481	4.26743	5.09895	4.60154
TCGA-CR-6493	282	1	MALE	69	III-IV	T3	N2	A	7.96975	7.79177	3.52545	4.80001	3.44063	4.92227	6.57739	9.06397	4.19438	6.36011	10.1044	9.03147	5.87187	8.19867	2.93512	3.04903	2.22256	5.6394	8.88532	6.21182	3.36566	4.9705	8.26076	8.64594	4.76892	5.13032	5.61439
TCGA-CR-7364	1435	0	MALE	66	III-IV	T3	N0	A	8.16056	8.7911	3.53996	5.28321	5.00497	9.17282	6.43498	9.38737	5.03115	6.92118	9.75612	8.76762	5.39321	8.78171	4.62749	3.21523	2.97084	5.57819	8.52373	6.42532	4.74345	5.18574	7.91247	9.07863	5.17099	5.23789	4.74516
TCGA-CR-7365	1191	0	MALE	60	III-IV	T4	N0	A	7.85736	7.94744	5.81961	4.71373	3.53999	6.69984	6.31231	9.64465	4.00954	7.52692	9.75156	8.70481	5.70434	7.96666	4.84826	3.04903	2.38201	5.70024	8.31981	5.86736	3.5461	4.63852	7.26801	8.36081	4.58737	5.14623	4.5046
TCGA-CR-7367	1440	0	MALE	52	III-IV	T4	N1	B	7.50989	8.24618	6.6319	4.6404	4.57907	5.16176	5.87933	9.19843	4.16141	6.34247	8.91741	9.02596	5.15693	7.99428	5.21098	3.04903	2.36217	5.04644	8.49044	5.59807	5.61416	5.54035	7.05686	8.20598	4.58707	5.11793	4.93194
TCGA-CR-7368	1245	0	MALE	54	III-IV	T4	N1	A	7.13151	7.35738	4.96376	4.81616	4.95043	8.40581	6.99683	9.0551	4.61893	6.53522	10.2912	8.47021	6.46732	8.68034	4.3191	3.04903	2.52674	6.09613	6.99834	6.68154	5.03519	4.46158	7.51369	8.18814	4.79447	5.48822	5.50488
TCGA-CR-7369	1090	1	MALE	59	III-IV	T4	N2	A	7.77938	8.64819	5.45839	5.03786	4.38508	8.10341	7.07529	8.96942	5.02507	7.24298	9.7026	8.91383	6.42556	8.30181	4.30618	3.17933	2.57644	5.88493	7.64643	5.51758	5.43768	4.93776	7.91446	8.37556	4.29732	5.57578	5.17264
TCGA-CR-7370	105	0	FEMALE	72	unknow	unknow	unknow	A	7.42676	7.60029	3.99955	5.68008	4.86059	6.97298	5.91197	8.76702	4.19809	5.67712	9.43383	8.5752	6.00516	8.83879	5.76877	4.2088	2.47587	6.00563	7.82737	4.14708	4.65833	5.24808	7.83607	8.31546	5.20463	6.29073	5.13993
TCGA-CR-7371	94	1	FEMALE	45	III-IV	T3	N1	B	7.58911	8.66173	6.07191	5.47803	5.55124	6.8079	5.66355	9.09568	4.22573	7.04858	9.37013	8.56501	6.07914	8.72557	5.30251	3.30421	3.21342	6.07418	8.62832	5.7281	6.29347	4.91262	8.01855	8.32118	5.29591	5.29784	4.78273
TCGA-CR-7372	759	0	MALE	45	I-II	T1	N0	B	7.5474	8.18615	5.33568	4.72232	4.26747	8.71467	6.35064	8.79721	4.29702	8.01866	9.58523	8.32668	5.38314	8.60507	4.49547	3.04903	2.44958	6.23924	8.38848	5.49089	6.6105	4.84256	7.70831	8.70805	4.73872	5.34624	4.72249
TCGA-CR-7373	889	0	MALE	66	III-IV	T4	N1	A	7.95094	6.59626	3.43063	4.75649	5.76766	7.08542	6.46556	8.73887	4.16321	4.83559	10.1824	9.29953	6.45733	7.58444	3.17377	3.17911	2.21097	5.784	7.49255	6.06411	5.32168	5.33663	7.70636	8.27766	4.34829	5.33317	5.67074
TCGA-CR-7374	30	0	FEMALE	67	unknow	unknow	unknow	B	7.88554	6.09106	5.70588	5.62595	5.59285	8.11937	6.80061	8.10117	3.98107	5.31588	9.84345	8.80302	6.02759	8.71679	4.80687	3.74571	2.47086	6.02057	8.38934	6.30853	5.47765	5.23094	8.0567	8.72941	5.24661	5.83115	4.88882
TCGA-CR-7376	972	0	MALE	83	III-IV	T2	N1	B	7.48558	7.22212	7.85036	5.06251	6.15071	10.8102	6.32444	9.17095	4.30804	6.25221	9.63736	8.20604	5.47403	7.81889	6.61172	3.04903	3.02824	5.51812	7.33629	6.12185	7.01233	4.78102	7.44932	7.93641	4.62671	5.2844	5.10258
TCGA-CR-7377	279	1	MALE	58	III-IV	T4	N2	B	7.25638	9.04737	6.25232	4.85079	5.87191	5.1885	6.30635	9.27992	4.39287	7.20397	9.9103	8.56647	5.68164	8.23704	5.7438	3.04903	3.2005	5.51715	7.52453	5.58431	6.73713	4.66543	7.59819	8.16637	4.35688	5.13433	5.33791
TCGA-CR-7379	1036	0	FEMALE	78	III-IV	T4	N2	A	8.08045	8.29478	5.46223	4.64042	4.04467	8.2636	5.80992	8.44991	4.21432	6.24316	9.63714	8.86354	5.79031	7.59809	4.49741	3.11444	2.27141	5.85096	8.5248	6.11895	4.76483	5.38337	7.72771	8.55017	4.58092	5.0314	5.53062
TCGA-CR-7380	606	1	MALE	58	III-IV	T4	N0	A	7.53881	6.685	5.10489	4.65184	4.20624	6.06687	6.3232	9.52414	4.06914	6.87007	9.75677	8.60609	5.5261	8.02355	4.13615	3.04903	2.41583	5.46743	7.84955	6.36041	5.1714	5.53534	7.84607	8.45743	4.33893	5.4507	5.44259
TCGA-CR-7382	796	0	MALE	49	III-IV	T2	N2	B	7.87188	6.51736	8.08647	5.11964	6.09715	9.83258	6.86876	8.6883	4.66303	5.93065	10.3598	8.83449	6.17756	7.78937	5.1885	3.27363	2.88531	5.89271	8.12763	7.25722	6.55114	5.15117	7.90502	8.44564	4.83303	5.27956	5.50869
TCGA-CR-7383	521	1	FEMALE	79	I-II	T1	N0	B	8.00291	6.35802	7.32371	4.74038	5.79767	6.58198	6.09003	8.2293	3.90205	6.71126	10.5187	8.69928	5.96636	8.55026	5.58943	3.40785	2.93122	5.58144	7.95408	6.55969	5.50065	4.68342	8.50059	9.23887	4.28698	5.74215	5.36399
TCGA-CR-7385	997	0	MALE	42	unknow	T1	unknow	B	6.82054	8.51502	5.4466	5.29862	6.13669	8.74367	6.84544	8.91837	4.89944	7.90691	9.65745	8.50308	6.53128	9.60011	5.57469	3.04903	2.52187	6.1111	7.71992	5.40211	5.50815	4.42646	8.05269	8.87039	4.67079	5.76483	5.69904
TCGA-CR-7386	1430	0	MALE	69	III-IV	T4	N2	B	7.15483	6.822	6.40373	4.72432	5.58257	5.82884	5.95247	9.06017	4.38807	6.86787	9.27867	8.35582	5.13638	8.29856	5.74383	3.04903	2.44429	5.46702	7.03846	5.96891	5.94688	4.98305	7.60775	7.94013	4.29684	5.05114	4.63415
TCGA-CR-7388	823	1	FEMALE	70	unknow	unknow	unknow	B	6.95683	8.05778	6.35594	4.91021	5.59572	7.95909	6.61372	8.92627	4.44444	7.24791	9.76592	8.15148	5.51957	8.16048	5.18329	3.13628	2.76305	5.29187	7.80414	5.27992	5.43016	4.59516	7.33508	8.18124	4.63904	5.24068	4.67023
TCGA-CR-7389	392	0	MALE	55	unknow	unknow	unknow	B	6.17851	8.20793	5.70629	4.83186	4.48018	7.10274	6.06971	8.85572	3.90445	6.7312	9.03722	7.56678	4.46376	8.73675	4.3723	3.04903	2.55693	4.96719	7.94761	5.36681	5.68872	4.54936	7.42296	7.19813	4.40208	4.65811	4.48312
TCGA-CR-7390	1508	0	MALE	67	III-IV	T4	N0	A	8.45656	9.13382	5.12078	4.43279	3.72141	8.1312	5.859	9.3138	4.12089	6.63175	9.8742	8.20521	5.62739	7.81199	4.25331	3.12064	2.57153	5.17116	8.60672	6.44525	3.58111	5.1562	7.54298	8.73201	4.69325	5.49596	5.19016
TCGA-CR-7391	913	0	FEMALE	36	I-II	T1	N0	B	6.58069	9.58431	6.74704	4.22235	5.26088	4.34317	5.99955	9.49756	3.89914	8.67266	9.23802	7.84892	4.90229	8.66683	6.14839	3.04903	2.62231	4.69559	7.59483	5.07322	6.68531	4.31535	7.28134	7.83532	4.12286	4.81744	4.14067
TCGA-CR-7392	1425	0	FEMALE	67	III-IV	T3	N2	B	6.97618	6.7361	5.52582	4.56611	5.60694	5.87673	6.4626	9.00321	4.15224	6.35602	9.44294	7.96921	5.54755	7.122	5.19165	3.04903	2.39166	5.06556	7.56092	5.89435	5.62964	4.6199	7.22746	7.96487	4.23352	4.81683	4.42871
TCGA-CR-7393	993	0	MALE	26	III-IV	T1	N1	B	6.83364	9.7187	6.77523	4.81146	5.25903	11.8034	6.3731	9.62915	4.01921	8.01655	9.24326	7.80391	4.8394	8.32071	6.13171	3.04903	2.72837	5.08584	7.69119	5.12205	7.47194	4.19228	7.25146	8.00969	4.49388	5.22022	4.42846
TCGA-CR-7394	1346	0	MALE	70	III-IV	T4	N0	B	6.92912	8.80886	4.66448	4.31476	5.2438	7.02234	5.95845	8.85134	3.90054	7.87268	9.19113	8.19104	4.75326	8.54914	4.43517	3.04903	2.21656	4.70129	7.10706	5.10729	5.92302	4.68435	6.76294	7.59729	4.20067	4.65705	4.45115
TCGA-CR-7395	930	0	FEMALE	80	I-II	T2	N0	B	7.18101	8.45514	4.91486	4.50484	6.06289	7.96161	6.2154	8.69077	3.85859	7.75445	9.84241	8.57695	5.17363	8.43291	4.39616	3.04903	2.32086	5.23985	7.91678	5.50195	5.56981	4.8889	7.49237	8.33452	4.1277	5.14272	4.83057
TCGA-CR-7397	754	0	MALE	44	III-IV	T3	N2	B	7.84161	9.92121	6.59656	4.56748	5.23636	6.48406	6.07626	9.13389	4.12577	7.43984	9.67508	7.98656	5.10793	8.21409	5.61259	3.13254	2.46861	5.05263	8.63544	5.75109	6.58255	4.91837	7.03664	8.27186	4.36773	5.05613	4.44878
TCGA-CR-7398	156	0	FEMALE	53	I-II	T2	N0	A	9.42314	7.33922	4.63779	5.81709	5.2505	4.90633	7.2586	9.09234	4.08727	4.80913	10.6264	8.97238	6.36345	8.43309	4.62649	3.13715	2.61354	5.92122	8.37834	6.51743	4.91404	4.89932	8.37343	10.2106	5.45482	5.68804	5.56878
TCGA-CR-7399	181	0	FEMALE	60	III-IV	T3	N2	B	8.34765	6.8436	4.40466	6.04766	6.51313	5.28583	6.7338	7.67878	3.74322	5.39197	9.2514	9.10387	6.51661	8.7262	7.88666	3.1089	2.69264	6.35768	9.21959	5.58515	6.17009	4.92188	7.94533	9.29896	5.32896	5.5343	5.40563
TCGA-CR-7401	1077	0	MALE	64	I-II	T1	N0	A	7.12427	8.50212	5.25037	4.40946	4.62231	5.0882	6.40694	8.57414	4.07921	7.4074	9.75453	8.24311	5.18221	8.24052	4.56612	3.04903	2.66944	5.26781	7.5251	5.39538	5.27439	4.60179	7.47412	8.427	4.01756	4.84629	4.69219
TCGA-CR-7402	911	0	MALE	68	unknow	unknow	unknow	B	6.595	7.19164	4.49589	5.28326	5.60187	6.15149	6.8775	8.38941	4.57105	5.40391	10.2768	8.4144	6.06153	7.9983	6.06044	3.2641	3.22193	5.59436	7.40296	4.60407	4.97114	3.82966	7.54666	8.32031	4.68018	5.0124	5.29276
TCGA-CR-7404	1472	0	MALE	53	unknow	unknow	unknow	B	6.81668	7.92822	6.30687	5.39354	6.06587	6.70273	6.60905	8.68411	4.21912	6.4563	9.84947	8.44661	6.51815	9.06971	5.88501	3.10934	3.12396	6.00078	7.8337	6.01912	5.4476	5.25168	7.43259	8.64559	4.42432	5.58027	5.64316
TCGA-CV-5430	4241	0	MALE	61	III-IV	T4	N2	B	8.69511	6.81606	4.12775	5.35909	5.75658	4.62746	7.7014	6.90028	4.0924	7.28281	10.1308	7.89226	5.15904	9.42373	8.54572	3.1529	2.7184	5.32648	8.84872	6.82575	5.4712	4.44806	7.48348	9.40997	5.52549	5.99873	5.07135
TCGA-CV-5431	522	1	MALE	73	III-IV	T3	N2	B	7.94482	7.49652	5.19521	5.0185	6.06175	8.86613	5.66088	7.60028	3.29978	4.96974	9.29018	8.22129	5.78076	7.9418	5.01056	3.61324	3.66773	5.20416	7.6664	5.26486	5.03909	4.17121	7.48361	8.90147	4.54478	4.99861	4.93883
TCGA-CV-5432	3930	0	MALE	68	III-IV	T3	N0	A	8.55649	7.69062	3.87755	4.97572	4.237	3.78382	5.73546	7.53921	3.95496	6.45714	9.82825	9.0801	6.04008	9.21479	4.52276	3.25558	2.65881	5.72598	8.60706	5.90392	3.71177	4.28655	8.19168	10.0867	6.14113	6.63949	4.73697
TCGA-CV-5434	3314	1	MALE	60	III-IV	T4	N2	B	7.90721	7.51811	6.02931	5.65498	5.51049	6.20917	5.83657	8.47374	3.74907	6.24853	9.6426	9.00195	6.4231	9.11356	6.79514	4.58495	4.6348	6.0815	8.65384	5.47038	5.91138	3.84768	7.55201	8.68109	5.58491	5.975	4.7746
TCGA-CV-5435	2319	1	MALE	57	III-IV	T4	N2	A	8.41702	4.64911	4.4902	4.78567	3.14035	8.46476	7.73799	9.17487	4.44259	7.32553	10.8701	8.9847	6.25068	7.82581	5.99289	3.60342	2.80437	5.73843	9.12885	6.69447	4.10297	5.15574	8.25993	8.37606	5.09885	6.07245	4.42526
TCGA-CV-5436	584	1	MALE	65	III-IV	T3	N2	A	7.85852	6.80869	3.68502	4.82177	4.62336	8.19789	5.55414	8.27889	4.00179	6.2302	9.67903	9.13899	6.1635	7.50353	4.00336	3.45376	2.37649	6.02636	8.23983	5.78285	4.26885	4.66195	7.9423	8.52504	4.42343	5.38617	4.52486
TCGA-CV-5439	546	1	MALE	62	III-IV	T3	N2	A	7.80862	8.76242	3.46845	4.77858	4.37699	8.89984	6.65971	9.23859	3.67653	7.33328	9.88939	8.68276	5.95681	8.52953	3.87922	3.12064	2.21924	5.70373	7.70422	5.95373	4.43382	4.61902	8.16447	8.3815	4.28056	5.39805	4.48733
TCGA-CV-5440	3270	0	MALE	52	III-IV	T4	N2	A	8.99656	7.70559	4.80161	4.98886	3.17459	6.23786	6.49463	8.91305	3.71943	6.51504	9.41716	8.20369	5.10978	8.07342	4.948	4.23539	5.28955	5.51747	8.30158	5.4273	4.13945	4.88562	7.57241	8.93714	5.15696	5.91427	4.03668
TCGA-CV-5441	2886	0	MALE	58	III-IV	T4	N2	A	7.99111	8.00898	4.14021	4.90059	4.9247	8.30522	6.74607	8.79725	4.26729	7.89723	10.1117	9.1031	5.78445	8.42762	3.9201	3.62779	2.41011	5.69337	8.3479	3.63225	4.2573	4.54552	9.07844	8.71996	4.51947	5.52548	4.92967
TCGA-CV-5442	2327	0	FEMALE	76	III-IV	T4	N2	A	7.20018	6.81871	2.26813	4.58229	3.45448	9.50223	6.71268	9.05041	4.16352	7.16405	10.0142	8.15974	5.95851	8.22647	2.83806	3.13232	2.27499	5.28626	8.08675	4.36862	2.96363	5.09559	7.99712	8.09436	4.32791	5.23814	5.40196
TCGA-CV-5443	2784	0	MALE	63	III-IV	T3	N0	B	6.68435	6.58215	4.60655	5.24	5.99273	4.02865	5.93503	7.33305	3.45869	6.2525	9.69225	8.01838	6.35739	7.72676	8.04071	3.22094	2.68359	5.52876	10.1242	5.63047	5.33526	2.66432	7.99704	8.41308	4.0416	5.37039	5.28371
TCGA-CV-5444	2437	0	MALE	64	III-IV	T4	N1	B	7.40556	5.30427	6.42441	4.95977	5.94427	8.36241	6.63732	8.92929	3.95716	5.111	9.64013	8.31622	5.42895	7.54234	6.098	3.04903	4.69939	5.70915	7.60059	5.55688	5.5669	4.27349	7.69812	8.33045	4.378	5.08473	5.16768
TCGA-CV-5966	545	1	FEMALE	63	III-IV	T4	N1	A	8.25298	5.61669	3.47551	4.90827	5.85872	7.27884	6.54594	7.40419	3.49287	5.47924	10.5378	8.92829	6.98261	8.17144	4.12837	3.04903	2.38554	5.84466	8.24026	6.5637	4.20593	4.22478	8.90602	9.31521	3.98341	4.8875	5.54061
TCGA-CV-5970	406	1	MALE	59	III-IV	T4	N2	A	7.55628	7.86341	4.62091	4.13236	4.54138	8.08677	6.50273	9.63542	4.1088	6.70636	9.44156	8.30068	5.35687	7.96993	4.84427	3.114	2.27028	5.19258	7.44512	5.27434	4.52265	4.85809	7.2959	7.99202	4.1339	5.15818	4.80828
TCGA-CV-5971	701	0	MALE	60	III-IV	T4	N2	B	6.38915	5.57958	7.73561	5.02735	6.028	7.49459	5.90867	8.5356	3.6405	5.51582	9.3636	8.208	5.37822	8.12403	6.4902	3.15616	6.25322	5.81057	8.21608	5.61364	6.56893	4.90119	7.26207	8.45937	4.29676	5.12865	4.63284
TCGA-CV-5973	2641	0	FEMALE	62	III-IV	T3	N1	A	8.19422	9.20032	2.07154	4.19753	4.51842	8.04356	6.16254	7.49479	3.53828	7.97472	9.13529	7.63602	4.40769	8.35958	3.22941	3.21798	2.1562	3.92744	6.61379	5.03865	2.56477	3.068	7.97108	8.33965	2.95906	3.97735	2.97826
TCGA-CV-5976	1478	0	MALE	50	III-IV	T4	N2	A	7.8986	7.08372	4.38982	4.62732	3.95085	8.12329	7.01113	9.58293	3.75174	7.74019	10.2769	8.85263	5.59753	8.38552	3.99201	3.29727	3.138	5.40068	8.28032	6.67213	4.0327	4.93832	8.30616	8.83967	4.53384	5.61351	4.8459
TCGA-CV-5977	1840	0	MALE	66	III-IV	T3	N2	A	8.52182	6.74531	3.16997	4.74657	3.98215	5.9528	6.84723	7.38327	3.75052	6.21478	10.0768	9.02509	5.54127	7.70404	3.43974	3.12792	2.26679	5.2388	8.34209	5.87938	3.12532	4.70672	8.41056	8.83553	5.04072	5.55707	4.05395
TCGA-CV-5978	215	1	FEMALE	53	III-IV	T4	N3	B	8.37177	7.88268	5.97738	5.78464	5.53881	4.47182	5.92368	9.01866	4.5573	7.28557	9.73437	8.6162	5.83188	9.13473	7.60575	5.44007	2.50149	5.81714	8.2676	5.28459	5.71596	4.86918	8.12518	8.95927	5.4179	5.68494	4.76363
TCGA-CV-5979	1315	0	MALE	26	III-IV	T2	N2	A	7.66224	7.37038	2.63899	4.83089	3.8955	5.47972	6.76676	8.84464	3.92416	4.84667	10.2869	8.92425	5.95695	7.88063	5.54763	3.04903	2.54773	5.70576	7.40792	6.33471	3.55411	4.10223	7.92027	8.41275	4.52941	5.19419	5.02941
TCGA-CV-6003	1665	0	FEMALE	50	III-IV	T2	N1	A	8.22344	7.22443	2.78566	4.93369	4.03835	4.88503	6.54865	7.80775	3.48345	6.50436	10.4458	9.05306	5.87479	7.90859	4.3794	3.18213	2.35092	5.50326	9.74352	6.05416	2.88976	4.33892	9.09158	9.13287	5.15089	5.07598	4.99143
TCGA-CV-6433	641	0	MALE	57	I-II	T2	N0	B	7.24764	5.734	4.41016	5.88402	6.60368	4.71802	6.60104	7.46541	4.13725	6.2186	10.0355	8.55133	7.01073	8.59959	6.99339	3.04903	2.30474	6.47732	8.97566	4.79174	6.7177	3.82362	8.86283	9.22829	3.77717	5.45083	4.62894
TCGA-CV-6436	1899	0	MALE	62	III-IV	T4	N0	A	7.41725	8.6033	2.95842	3.73424	5.64103	6.55703	5.14856	6.51782	2.93353	7.36366	9.33988	7.59762	4.25244	8.66752	2.78211	3.04903	2.14142	4.06198	7.2772	5.10528	3.70913	3.04287	7.99108	8.01961	3.17277	3.88089	3.72359
TCGA-CV-6441	292	1	MALE	60	III-IV	T3	N0	A	7.46361	6.99144	3.55485	5.67642	3.4828	4.52909	6.01807	7.8312	3.68704	4.39541	9.70321	8.81724	5.45616	8.34946	4.83779	3.04903	3.07333	5.954	8.70487	4.80648	3.57303	5.01935	7.51856	8.36583	3.90928	5.03918	5.34629
TCGA-CV-6933	2741	1	MALE	53	III-IV	T3	N1	A	7.78596	8.63913	5.25755	4.75392	4.64806	5.06609	6.64368	8.78261	3.95397	7.61342	10.046	8.54202	5.99526	9.23732	7.56823	3.66395	2.31426	5.52905	8.13904	5.50453	3.65377	4.60729	7.37011	8.84255	4.96882	5.524	4.56494
TCGA-CV-6934	65	1	FEMALE	66	III-IV	T3	N2	B	7.87515	7.73326	7.2086	5.15605	5.56837	7.1666	6.84167	9.05801	4.50686	7.69536	9.83777	8.41118	5.43919	7.79105	6.54294	3.76728	2.81653	5.47738	7.59248	5.63288	6.6956	4.68867	7.27909	8.07151	4.06052	5.29581	4.88234
TCGA-CV-6935	295	1	MALE	67	III-IV	T3	N2	A	6.8947	6.04288	4.03564	4.29671	4.23933	7.81112	6.38968	9.50398	3.87039	7.31166	10.12	7.65893	4.91109	8.4668	4.2792	3.89354	2.41111	4.73843	8.41275	5.0743	4.11005	4.97628	7.90159	8.54527	4.32035	5.27782	3.71208
TCGA-CV-6936	166	1	MALE	68	III-IV	T4	N2	A	7.09039	8.62198	4.48014	5.05611	4.81308	6.01412	6.61361	7.91723	3.99574	5.79443	9.6384	8.55406	5.77753	8.01109	3.85821	3.0991	2.48769	5.63309	8.90115	5.21831	4.29803	5.04736	7.81959	7.71831	4.78039	5.30704	4.45069
TCGA-CV-6937	624	1	MALE	71	I-II	T2	N0	A	8.09056	8.44583	4.4932	4.94472	4.60136	6.88739	7.06366	7.32053	3.82318	8.48763	9.65424	8.16634	4.74413	9.6922	4.72903	3.33198	2.59331	4.73369	8.85984	6.18794	2.93523	4.79042	7.91718	8.97275	4.44326	4.93202	4.05182
TCGA-CV-6938	144	1	MALE	87	I-II	T2	unknow	B	7.66648	8.31029	3.86426	4.57402	5.41783	5.72626	6.25185	8.10257	3.89948	7.22858	10.0029	8.92717	5.21779	8.66669	5.38205	3.04903	2.46332	5.70231	7.91094	7.01413	5.18821	4.70403	8.00907	8.43459	4.03991	5.09429	4.95197
TCGA-CV-6939	666	1	MALE	60	III-IV	T4	N2	B	7.1831	7.23589	6.10646	5.86307	5.71841	9.50133	6.69717	8.34114	4.83255	6.28511	9.85373	8.51697	6.79138	8.24275	7.27706	3.04903	3.28546	6.27901	8.53295	5.60753	5.66796	5.02914	8.22851	8.28423	4.62497	5.84493	5.44682
TCGA-CV-6940	804	1	FEMALE	80	III-IV	T2	N1	A	7.5833	8.2856	5.30972	5.17994	4.18496	7.462	6.19365	8.50127	4.41303	7.73323	9.94567	8.95032	5.92042	8.48556	4.90885	3.71561	3.19356	5.73072	8.25515	6.14293	3.94349	4.42915	8.22244	8.85369	4.84535	5.87718	4.72056
TCGA-CV-6941	342	1	MALE	51	III-IV	T3	N0	A	8.04609	8.78875	5.78569	5.30363	4.80278	6.5289	6.57849	8.72316	4.17503	7.86602	9.6554	8.56865	5.61031	8.46597	5.01333	3.26036	2.42683	5.64765	7.73594	5.77352	4.70428	5.28093	7.88993	8.70871	5.11991	5.51316	4.61185
TCGA-CV-6942	4282	0	FEMALE	73	I-II	T2	unknow	B	6.57608	6.48839	5.68159	4.70018	5.8294	7.17852	6.00878	7.62676	4.00418	5.17267	9.75292	8.52835	5.29296	7.68818	4.7013	3.2014	3.13191	5.15658	6.79835	5.77187	6.13664	3.87646	7.90149	8.65736	3.9701	4.79946	5.00621
TCGA-CV-6943	602	1	MALE	74	III-IV	T3	unknow	B	7.00082	8.53028	6.22524	4.39483	5.94522	6.82449	6.37971	8.93811	3.96684	8.11738	9.37581	8.00132	4.98048	7.75695	5.55671	3.04903	2.53863	5.02679	7.17974	5.69923	6.45273	4.26919	7.23133	8.0026	3.97733	5.23261	4.39842
TCGA-CV-6945	366	1	MALE	41	III-IV	T4	N2	A	7.98776	7.53729	2.65988	4.46075	3.48957	7.2026	6.40628	8.97705	3.80082	7.31091	10.0571	8.36222	5.1726	7.97966	3.15606	3.3229	2.23065	4.87378	7.54442	6.24768	2.5714	4.72685	7.86555	8.77037	3.9184	5.00845	4.23185
TCGA-CV-6948	1289	1	FEMALE	79	III-IV	T4	N3	B	7.49824	5.25117	4.39552	4.70082	4.7393	4.98353	6.69121	7.88007	4.71531	5.53913	9.48301	8.14793	5.88516	9.16942	5.77042	4.124	2.60932	5.33514	9.18474	7.01583	4.79451	4.07505	7.97507	8.87236	4.79119	5.37348	4.64851
TCGA-CV-6950	459	1	MALE	64	III-IV	T3	N2	A	7.48975	6.99348	5.47459	5.03371	4.37068	6.05918	6.26633	9.28118	4.09814	5.2611	10.0108	9.03636	6.16434	7.84613	4.71078	3.10222	3.18315	5.95619	7.66986	6.7611	4.71032	4.12498	7.90686	8.3172	5.33414	5.88929	5.60591
TCGA-CV-6951	915	1	MALE	57	III-IV	T4	N2	A	8.07685	7.31834	4.13213	4.62036	3.68166	7.57463	6.57445	9.43763	4.42214	8.36039	9.60689	8.80512	5.19937	8.32224	4.06982	3.84323	2.59828	5.52968	8.1139	5.99492	3.96634	4.64499	7.37809	8.72429	4.72835	5.88105	4.20509
TCGA-CV-6952	185	1	FEMALE	65	III-IV	T3	N2	A	7.36244	8.33483	3.45011	4.20248	4.61478	8.98969	6.43874	8.50981	4.10267	6.50379	9.79669	8.45076	5.51464	8.29956	2.98101	3.04903	2.53528	5.27618	7.24111	5.42969	4.2554	4.63323	7.44296	8.24765	4.10896	5.03246	4.82335
TCGA-CV-6953	1641	1	FEMALE	80	III-IV	T3	N0	A	7.49254	8.70488	3.17069	3.98894	4.29854	8.16395	6.05663	8.92298	3.89449	7.91284	9.52569	8.09978	4.92514	8.38415	3.02408	3.04903	2.19226	4.76393	7.8486	4.82369	4.13455	4.90931	6.04528	8.03712	3.81171	4.61586	4.12387
TCGA-CV-6954	2002	1	MALE	59	III-IV	T4	unknow	A	7.13992	6.95663	4.30133	5.18485	4.84934	6.24583	7.22314	7.85238	3.87631	6.22719	10.3816	8.72891	5.62784	9.14769	3.94766	3.04903	2.43782	5.62244	8.59092	6.47459	4.73697	4.64683	7.63375	8.77981	4.11862	5.64278	4.6524
TCGA-CV-6955	334	1	FEMALE	74	I-II	T2	unknow	A	6.87686	9.15231	4.31906	4.05619	4.16287	8.18133	5.95208	8.84079	3.75822	8.02982	9.13779	7.80065	4.34488	9.82446	2.76697	3.15964	2.43005	4.49745	7.14408	4.74177	4.44435	4.33197	6.94428	7.86509	3.99824	4.58594	4.21599
TCGA-CV-6956	217	1	MALE	67	III-IV	T3	N1	A	7.47066	9.07987	4.11182	5.06118	2.16315	6.76983	6.91278	9.30007	3.7548	5.64952	10.2766	8.6121	5.72565	8.35254	3.88116	3.12417	2.89004	5.91953	8.36927	6.48148	3.79679	4.17504	7.95364	8.67374	4.41294	5.26666	4.95936
TCGA-CV-6959	256	1	MALE	48	III-IV	T3	N0	A	7.98121	7.9233	5.86427	4.85019	4.81883	7.05985	6.84627	9.62567	4.02709	5.63823	10.4413	9.20353	6.26428	8.03327	4.85118	3.04903	4.55813	5.90171	10.1861	6.15329	5.24866	4.72494	8.1762	8.53379	4.41331	5.23786	5.22681
TCGA-CV-6960	862	1	MALE	49	III-IV	T3	N0	A	8.19238	9.26653	3.03024	5.50971	3.96448	5.57175	5.77285	8.71625	4.92513	6.69107	9.15981	9.0035	5.39912	8.6514	4.04289	3.4724	2.35827	5.75242	8.87004	6.84252	2.82191	4.33741	8.39805	8.62869	5.31603	5.54569	4.721
TCGA-CV-6961	76	1	MALE	61	I-II	T2	N0	A	8.23108	7.90677	5.83722	4.6321	4.01585	8.22793	6.80178	8.93268	4.60846	5.33719	10.2364	9.03285	6.4955	8.32117	5.25239	3.10334	3.2238	6.09473	7.90142	6.65121	4.29957	5.98905	7.74424	8.6459	4.83654	5.40595	5.06246
TCGA-CV-6962	126	1	MALE	65	III-IV	T4	unknow	A	8.0626	7.34822	4.85518	5.46061	3.37758	6.96762	5.67126	7.63878	3.39905	7.33609	9.30759	9.12431	5.6895	9.7301	3.64072	3.45796	2.38517	6.223	9.37539	6.57215	4.32659	4.65115	8.14651	8.71366	5.98581	5.87806	4.46354
TCGA-CV-7089	1972	1	MALE	74	III-IV	T4	N2	A	7.58065	10.1011	3.32596	4.51648	4.69955	6.21988	6.17678	8.93708	4.14778	8.02088	10.2525	8.64508	6.043	8.48634	3.52742	3.1089	2.24488	5.37501	7.73631	5.41115	4.42123	4.25781	7.89222	8.36438	4.27904	5.04042	4.96707
TCGA-CV-7090	5252	0	MALE	39	I-II	T2	unknow	B	6.98371	7.45303	5.28982	4.7747	5.18736	7.69236	6.5884	8.9387	4.13825	4.60431	10.2162	8.50759	5.50936	7.53954	6.00232	3.04903	2.46541	5.2261	7.75908	5.55889	4.56429	4.65188	7.6993	7.92374	4.70957	5.29837	5.22278
TCGA-CV-7091	3381	0	MALE	54	I-II	T1	N0	A	8.08876	8.79268	4.8715	4.71874	4.48757	7.00942	6.60515	8.58305	3.90125	8.20609	9.93575	8.42988	5.83214	7.59388	4.36195	3.04903	2.54425	5.10008	7.97714	5.53183	4.63113	5.01282	7.54016	8.82899	4.31402	4.95574	4.88489
TCGA-CV-7095	572	1	FEMALE	87	I-II	T2	unknow	A	7.30915	8.72319	3.54705	4.69891	4.35697	6.55016	6.20278	8.57312	3.85417	6.70737	9.81482	9.04893	5.51006	8.32231	3.49151	3.13122	2.98403	5.61906	8.10395	6.77608	3.86544	4.23031	7.39905	8.46153	3.87042	4.84973	4.84029
TCGA-CV-7097	385	1	MALE	53	I-II	T2	unknow	A	7.39665	8.37401	6.41592	5.01658	5.07018	6.02326	6.556	8.59474	3.86737	5.06903	10.0863	9.1072	5.94927	8.26123	5.19943	3.11821	2.66469	5.78163	8.41089	7.16534	4.73913	4.90285	8.16136	8.34582	4.60129	5.32397	5.04483
TCGA-CV-7099	243	1	FEMALE	85	I-II	T2	unknow	A	7.95075	8.99768	3.71272	4.7291	5.28869	9.99977	6.25648	8.56737	4.15001	6.47756	9.89174	8.86449	5.7538	8.28131	5.1424	3.24911	2.55532	5.40295	7.92819	6.52213	4.77227	4.8198	7.83274	8.58989	4.52036	5.10828	4.83049
TCGA-CV-7100	274	1	MALE	66	III-IV	T2	N1	A	7.25649	6.00936	5.37544	5.33827	5.04446	6.4975	7.12499	8.79678	4.51022	6.89766	10.5207	9.16934	6.89584	7.55818	4.56159	3.04903	2.43541	6.49501	8.54741	7.68799	5.25071	4.49859	8.77308	8.2288	4.78161	5.90367	5.75368
TCGA-CV-7101	160	1	MALE	80	I-II	T2	unknow	B	7.01676	7.96035	5.27446	4.67439	4.96886	7.5588	5.94162	9.11094	3.90801	5.58519	9.51418	7.76218	5.25901	8.02028	5.88374	3.41155	2.47052	4.93923	7.67296	5.27119	4.86414	4.58039	6.90668	7.9199	4.67175	5.38599	4.13071
TCGA-CV-7102	56	1	FEMALE	76	III-IV	T3	N2	B	7.42962	6.44916	6.08981	4.81334	4.63178	4.14242	6.84552	9.40138	4.52301	5.9705	10.0934	8.58533	6.18854	7.98367	5.22709	3.19028	2.86256	6.02303	7.723	6.02706	5.51597	5.43342	7.22878	9.00855	4.66411	5.33346	5.01111
TCGA-CV-7103	1591	1	MALE	49	III-IV	T2	N2	A	8.53538	6.26716	5.25289	5.45075	4.90264	7.0839	5.94023	8.7609	3.74729	8.30213	9.36713	8.40192	5.328	9.69054	5.92425	3.18019	2.93832	5.64975	7.72635	6.27758	4.8286	4.36681	7.9511	9.45337	5.08955	5.49904	4.36858
TCGA-CV-7104	393	1	FEMALE	61	III-IV	T2	N2	A	7.35505	7.41287	5.44857	4.36881	5.3787	8.76812	6.89665	8.79791	3.95451	7.16567	9.9801	8.4985	5.31915	7.5629	4.75164	3.04903	3.58198	5.52094	7.44146	6.4093	5.06969	4.53851	7.82794	8.1414	4.64147	5.13046	5.0202
TCGA-CV-7177	663	1	FEMALE	82	I-II	T2	unknow	A	8.04023	7.68326	4.60406	5.26596	4.14061	8.2074	5.98379	9.29029	4.48423	8.27858	9.41706	8.39342	4.91743	8.3008	4.84673	3.515	2.17671	5.40811	8.84305	6.15472	4.64123	4.58612	7.98166	9.11557	4.95864	5.36604	4.65006
TCGA-CV-7178	2166	1	FEMALE	64	III-IV	T4	N2	B	8.2351	7.70028	6.43758	4.9579	5.5706	7.50812	7.2464	9.06913	4.292	4.84729	10.0432	8.68646	5.29115	8.30876	5.40084	3.17242	2.67272	5.66744	8.43047	6.20062	6.11294	5.26731	7.63706	8.45504	4.70765	5.31795	5.12662
TCGA-CV-7180	327	1	MALE	34	I-II	T2	unknow	A	7.43007	9.45125	2.36267	4.68103	3.68337	9.89426	6.02782	8.40703	3.58762	7.58085	9.78725	8.69088	5.61383	8.83726	3.42063	3.04903	2.21538	5.4298	7.6925	5.51387	4.59221	4.27186	7.86556	8.61585	4.18253	5.40122	3.62466
TCGA-CV-7183	3981	0	MALE	53	I-II	T2	N0	A	6.48747	9.7601	3.01559	3.63312	3.15074	4.32007	5.6857	8.49267	3.66673	7.99122	9.44025	7.98715	4.66527	8.96135	2.98546	3.04903	2.14176	4.62714	7.62728	4.54912	3.49123	4.49629	7.01352	7.84825	3.80024	4.43736	4.28663
TCGA-CV-7235	2347	0	MALE	67	I-II	T2	N0	B	7.77756	5.62987	6.69586	4.87945	5.17448	7.8113	6.1941	9.09579	3.69327	5.14042	10.2392	8.84362	5.67755	7.39262	5.39475	3.04903	2.27427	5.79544	7.77427	5.55976	6.04767	4.57723	7.06837	7.84754	4.86622	5.53817	5.09907
TCGA-CV-7236	144	1	FEMALE	77	III-IV	T3	N2	A	8.1892	6.44348	5.5944	4.75599	5.01656	8.39526	6.63404	9.40356	4.91889	6.67116	10.3232	8.78652	5.92849	7.51289	4.98596	3.04903	2.58557	5.77443	7.97112	6.92081	5.07733	4.31321	7.8897	8.36715	4.76995	5.3912	5.0446
TCGA-CV-7238	2727	0	FEMALE	69	I-II	T2	N0	B	7.32371	7.18942	5.7258	4.38497	5.52513	5.24908	6.33315	7.825	3.90658	7.1886	9.56532	8.28533	5.36418	7.53857	5.53301	3.20992	3.65749	5.15379	7.38863	5.97771	5.36041	3.89955	7.50427	8.17556	4.19684	4.97435	4.15046
TCGA-CV-7242	1095	0	FEMALE	60	I-II	T2	N0	B	7.40037	8.64254	4.05575	4.85148	6.08633	5.65563	6.41809	8.23656	4.56296	6.27487	9.55859	8.56303	5.4763	8.17023	4.89648	3.60163	3.1923	5.13858	7.76155	5.78811	5.50088	4.24579	7.46243	8.23737	4.74502	5.24105	3.58352
TCGA-CV-7243	954	0	MALE	50	III-IV	T2	N1	A	7.5919	6.3122	4.11435	4.89577	3.45723	8.23275	7.43778	8.90581	4.28285	7.3374	10.2356	8.88471	5.18271	8.57081	4.14242	3.04903	2.4434	5.27306	8.00312	5.58277	5.28977	4.45098	7.57838	8.56501	4.22955	5.27853	4.18331
TCGA-CV-7245	797	0	MALE	62	III-IV	T4	N0	A	7.08418	8.11521	3.08567	5.01994	4.91286	10.5731	6.31415	8.89992	4.58126	6.82364	9.67869	9.07491	6.1193	7.72044	3.98586	3.04903	2.24394	6.11569	8.03794	5.96179	3.45096	4.91554	7.80649	8.4559	4.61571	5.16695	4.69258
TCGA-CV-7247	577	1	MALE	55	III-IV	T3	N0	A	7.85748	8.08647	5.42159	5.31395	3.77893	5.01727	6.38159	8.91221	4.1356	5.26227	9.86929	9.14726	6.19792	8.2223	4.62512	3.22918	3.70752	6.19139	8.17476	5.97973	4.74112	5.33082	7.95285	9.39379	5.37631	6.12836	5.24803
TCGA-CV-7248	521	1	FEMALE	63	III-IV	T4	N2	B	7.59348	7.82007	5.7123	5.39716	4.99989	6.32299	6.19315	8.41345	4.08523	7.23487	9.53499	8.77681	5.75358	8.63441	5.34568	3.72071	2.92243	5.73908	8.24206	5.47163	6.31528	4.65501	7.83895	8.71146	5.08629	5.60335	4.81858
TCGA-CV-7250	2900	1	MALE	64	III-IV	T4	N0	A	7.7088	10.9749	4.39023	4.63518	5.07889	6.41156	6.92078	7.86733	4.25055	7.56931	10.1779	8.52575	5.50473	8.92372	4.65793	3.04903	3.08681	5.40164	8.30736	5.73533	4.25972	4.92797	7.9429	8.1391	5.03885	5.4293	4.79254
TCGA-CV-7252	151	1	FEMALE	62	III-IV	T4	N0	A	8.2638	8.42361	4.0891	4.58165	4.33951	8.06	6.65947	8.73069	4.40481	6.99013	10.2787	8.90485	5.735	8.02629	4.1894	3.04903	2.14747	5.76687	7.99238	5.94671	4.84668	5.17449	7.96548	8.38103	4.60571	5.23696	5.07
TCGA-CV-7253	361	1	MALE	58	III-IV	T4	N0	A	7.50883	8.65851	3.06554	4.78798	4.51487	8.47577	6.36789	9.61237	4.36722	7.49741	9.84845	8.97199	5.97154	7.68065	2.781	3.25099	2.35656	5.88764	8.04734	5.33334	2.96925	5.26609	6.7475	8.55835	4.50118	5.68637	4.74078
TCGA-CV-7254	1459	1	MALE	55	I-II	T2	unknow	B	8.09655	5.64705	5.92073	5.38891	5.93857	7.73851	5.90094	7.43329	3.96056	5.79755	9.60896	8.09772	5.35097	8.58206	6.16792	3.51109	3.08189	5.60071	8.94106	5.11498	6.95998	4.64264	7.60318	8.90933	4.6513	5.66696	4.52171
TCGA-CV-7255	64	1	FEMALE	32	III-IV	T4	N0	A	7.77154	8.26264	3.59334	4.23945	3.3122	5.72989	7.19126	9.41473	4.09141	5.67318	10.4746	8.74533	5.74272	7.46602	3.18959	3.04903	2.59448	5.14427	8.08995	6.04288	3.86839	4.73838	8.38842	8.24479	4.3927	5.15409	5.25702
TCGA-CV-7261	1512	0	MALE	57	III-IV	T4	N0	A	7.9465	7.44864	4.06667	5.66442	4.68333	7.48442	6.00059	8.93544	3.97816	8.00795	9.96294	8.77234	6.32522	9.3517	5.01918	3.73223	2.55532	5.86212	8.20946	5.73288	5.46225	4.38312	8.04252	8.66736	5.40791	5.58179	4.85377
TCGA-CV-7263	560	1	MALE	64	I-II	T2	unknow	B	7.47845	6.78597	5.75065	5.2209	5.30297	7.75196	6.16508	8.421	4.52384	6.95244	9.90046	8.50048	5.54274	8.57375	6.6479	3.10734	2.87775	5.40163	8.59036	4.42128	5.63185	4.21756	7.91593	8.48154	4.35462	5.46478	5.21344
TCGA-CV-7406	1748	1	MALE	49	I-II	T2	N0	A	9.05087	7.40258	6.61024	5.17781	4.48257	9.26891	6.67558	8.77112	4.3153	8.46445	9.63845	8.52951	6.44192	8.98536	4.81484	3.04903	4.61268	6.19304	8.19876	5.83442	4.96811	5.73098	7.78303	9.73203	5.27056	5.28884	5.74232
TCGA-CV-7407	1081	1	FEMALE	67	I-II	T2	unknow	A	8.0307	5.98015	5.49234	4.71628	4.82529	9.83094	6.97468	8.55862	3.86604	7.25742	10.1202	8.46654	5.57097	8.38084	3.77097	3.56937	2.35312	5.34623	7.29864	7.15178	4.86606	4.48042	7.70751	8.78675	4.37802	4.79718	3.80969
TCGA-CV-7410	6417	1	MALE	61	III-IV	T2	N1	B	6.21816	6.90195	6.12842	5.0071	6.89069	5.37097	6.85265	8.81979	3.84398	6.2159	9.93614	8.41153	5.55105	8.10101	5.14811	3.04903	3.63552	5.31416	7.41722	7.20043	7.00835	4.92127	8.0596	7.75053	4.77981	5.26007	5.08921
TCGA-CV-7411	2717	1	FEMALE	64	III-IV	T4	N0	A	7.1368	9.71379	4.44666	3.45697	4.05115	7.42648	6.1422	8.63021	3.78299	8.26666	9.1082	7.81696	4.63679	9.18067	4.04056	3.04903	2.14815	4.52825	7.17488	4.88831	4.17166	4.32267	6.5914	7.6018	3.5428	4.21342	3.88409
TCGA-CV-7413	294	1	FEMALE	74	I-II	T2	N0	A	7.6402	7.61185	5.13667	4.90869	5.34375	5.42209	6.43823	8.30845	3.75626	7.62994	9.78061	8.48464	5.24213	8.40806	4.84439	3.22285	2.31119	5.27394	7.59829	6.18122	4.20931	4.82918	7.84884	8.32804	4.21659	5.03735	4.69503
TCGA-CV-7414	14	1	MALE	78	III-IV	T4	N2	A	7.58064	7.63787	5.65379	5.15955	5.59956	6.38591	6.74154	9.03641	4.74758	7.92663	9.97815	8.79772	5.60187	9.62664	3.78064	3.04903	4.37249	5.64198	8.19269	7.73951	4.22172	4.60346	8.18576	8.6271	4.07668	4.8975	4.05399
TCGA-CV-7415	695	1	MALE	60	III-IV	T4	N2	A	7.30824	6.06218	4.16273	4.7215	5.09687	6.11081	7.02472	8.45584	4.51844	6.91324	10.1503	8.43637	5.75816	7.70848	4.81665	3.04903	2.37537	5.65188	6.63173	6.67061	4.81628	4.24435	7.75807	8.31257	4.19802	5.59707	4.76986
TCGA-CV-7416	763	1	FEMALE	29	III-IV	T4	unknow	A	7.83092	7.95856	5.78633	5.48611	4.63625	7.71725	6.90961	9.99502	4.65032	6.99514	9.84246	8.8015	5.94311	8.14792	4.65679	3.51871	2.33822	5.66744	8.12863	5.98514	4.2142	5.27631	7.13012	8.44981	4.71624	5.3923	4.7279
TCGA-CV-7418	789	1	MALE	62	III-IV	T4	N2	A	8.0171	6.25764	3.58039	5.53048	4.70257	8.55901	6.31848	7.29454	3.46089	7.0082	9.54433	9.00368	6.07203	8.81823	4.8503	4.73285	2.68034	6.38868	8.13916	6.08018	4.81821	3.98436	8.86717	9.16198	5.27772	5.41883	4.72493
TCGA-CV-7421	2	1	MALE	76	III-IV	T4	N0	A	8.14093	7.59849	5.79748	5.43109	4.26935	6.53039	6.34306	8.1662	3.91474	7.13811	9.63335	8.69998	5.86008	8.09855	5.74185	3.11976	2.81479	5.69775	9.17474	4.66733	5.36026	4.28494	8.26871	9.34704	5.17746	5.48365	4.46193
TCGA-CV-7422	1037	1	FEMALE	60	III-IV	T4	N1	A	8.01797	8.72232	5.68266	5.41617	4.90555	7.65549	6.39355	9.32198	3.96756	6.79796	10.1786	9.22974	6.56583	9.07931	5.63421	3.39946	2.57621	6.15627	8.02955	5.35266	4.93679	5.32224	8.12494	8.92681	4.86344	5.81595	4.8542
TCGA-CV-7423	3059	1	MALE	65	I-II	T2	unknow	A	7.67046	8.63638	3.77447	4.51724	3.34417	8.59096	6.39294	9.45513	4.66547	7.34965	10.0868	8.61697	5.55974	7.91182	3.41161	3.04903	2.37462	5.38288	7.57972	6.88545	3.19821	5.11304	7.55657	8.27351	4.40615	4.96449	5.56031
TCGA-CV-7424	453	1	MALE	67	III-IV	T3	N2	B	7.31969	6.48349	5.3119	5.4144	5.25214	5.4179	6.05399	7.35872	3.54962	6.13409	9.70891	8.07319	5.55269	8.78153	6.0079	4.48013	2.55965	5.40474	8.16156	6.11917	4.54643	3.83778	7.4934	8.32316	4.73351	5.61738	4.14362
TCGA-CV-7425	1718	1	FEMALE	77	III-IV	T3	unknow	A	6.90191	7.88658	5.01405	4.63685	4.70651	5.34206	6.09472	8.93469	3.64628	7.06566	9.493	8.50139	5.30108	9.08055	3.63092	3.04903	2.16274	4.96005	7.89772	4.88599	4.96263	4.95952	7.45251	8.16436	4.1496	5.1368	4.70313
TCGA-CV-7427	4760	1	FEMALE	73	I-II	T2	unknow	A	7.40923	8.37434	4.63175	4.75053	5.31535	9.48704	6.37506	9.04861	4.07161	7.61567	9.63176	8.47288	5.28407	8.13684	3.50068	3.10801	2.29654	5.33405	7.36009	6.66738	4.94754	4.96291	7.4103	8.13169	4.42689	5.15034	5.06272
TCGA-CV-7428	1671	1	MALE	47	III-IV	T4	N2	A	7.5141	7.68455	4.85299	5.01387	5.59189	8.13354	6.80465	9.12773	4.29896	6.3491	9.88973	8.8608	5.71384	8.28026	4.82577	3.04903	2.48735	5.47933	8.14774	6.16462	4.6359	5.00282	8.00358	8.45435	4.83477	5.33726	5.31544
TCGA-CV-7429	107	1	MALE	55	III-IV	T4	N2	A	7.89651	5.3468	5.84673	5.0994	4.93361	6.64563	5.94785	8.24157	4.3368	4.29778	10.5679	9.12714	6.07831	8.16005	5.02764	4.1691	2.80332	6.53427	8.83875	7.34457	5.11818	5.18445	8.40997	9.21697	4.55908	5.55019	5.05462
TCGA-CV-7430	495	1	MALE	56	III-IV	T4	N0	A	8.59728	9.57251	2.7804	4.67011	3.05998	7.8626	5.90452	9.3987	4.05322	7.98724	9.69872	8.96943	6.57956	8.64667	2.92754	3.10912	2.37733	5.56822	8.41822	4.26715	3.20716	4.9277	7.78491	8.87535	4.64633	5.54799	4.74001
TCGA-CV-7432	2570	1	MALE	79	I-II	T2	N0	A	7.80613	7.15436	3.87072	4.12896	3.44076	6.51165	6.49493	8.80383	4.42488	5.76317	10.3237	9.13797	5.78228	7.90662	2.84744	3.23801	2.17771	5.9546	8.33249	6.28802	2.89297	4.82069	8.14927	8.76315	4.55536	5.44429	4.92244
TCGA-CV-7433	601	1	MALE	49	III-IV	T4	N2	B	7.84456	7.42973	6.172	4.68115	6.6039	6.48951	6.68586	8.14129	4.04366	7.75709	10.1646	8.68481	5.42224	8.27029	5.98858	3.04903	2.34362	5.3251	7.94224	6.572	5.75655	4.18195	7.78554	8.26343	4.14071	5.12179	4.48545
TCGA-CV-7434	218	1	MALE	64	III-IV	T4	N1	A	8.42503	5.55997	4.43427	4.17362	4.0599	7.93521	6.74998	8.66749	3.9975	6.34842	9.95833	8.13507	6.0796	7.52725	3.26038	3.04903	2.27223	5.91348	7.57703	6.62855	3.8352	5.12951	8.38351	8.60125	4.42454	5.14496	5.31491
TCGA-CV-7435	4680	1	FEMALE	57	III-IV	T3	N2	B	8.0102	8.6959	6.9729	4.8654	5.40239	6.94959	6.42392	8.7879	4.63962	7.45848	10.3474	8.53097	5.44233	8.38218	5.60202	3.3616	2.41456	5.3276	7.65477	5.75137	5.4615	5.91731	7.67185	8.53899	4.93325	5.46105	4.44575
TCGA-CV-7437	506	1	MALE	77	I-II	T2	unknow	A	9.53995	6.70036	3.56624	4.96174	3.81108	6.60085	6.82294	8.73457	3.64284	4.55445	9.50108	8.94909	5.23247	8.54359	3.73433	3.45586	2.48564	5.6836	8.6143	5.74226	3.29639	5.07864	7.61933	9.34632	4.32965	5.0247	4.42461
TCGA-CV-7438	194	1	FEMALE	87	I-II	T1	unknow	A	7.64975	6.46904	5.76527	4.6921	5.20157	6.33299	6.67163	8.60632	3.78467	5.51156	10.0248	8.80273	5.67945	7.79856	5.65283	3.04903	4.05992	5.77811	7.75672	6.17851	4.26385	4.30977	8.10527	8.4896	4.4312	5.14865	5.05338
TCGA-CV-7440	675	1	MALE	38	I-II	T2	unknow	A	7.74559	6.6958	4.25512	5.20108	3.9237	8.90976	6.78727	9.56145	3.74791	5.94167	10.5082	9.42965	6.16264	7.83381	4.20263	3.04903	2.526	6.13269	8.66121	6.57472	4.54776	5.74563	7.04	8.75487	4.7696	5.22338	5.4312
TCGA-CV-7446	1093	1	MALE	66	III-IV	T2	N2	A	8.10949	7.09565	5.92481	6.22753	3.77438	9.15712	6.40116	9.35514	5.0591	6.02123	9.48626	9.00874	6.22651	8.75028	5.2577	3.63115	2.5811	6.38904	8.56739	5.46783	5.29373	5.95561	7.66717	8.30107	5.17032	5.83713	4.66202
TCGA-CV-7568	927	1	FEMALE	48	III-IV	T4	unknow	A	7.32746	6.7529	4.84779	5.56613	3.87109	7.14337	6.43087	9.70343	4.34947	7.10356	9.20382	9.15279	6.33468	8.15202	4.33014	3.11067	2.52839	6.37915	7.20055	4.49866	4.94816	5.59293	7.31969	8.34168	4.33668	5.71867	4.95968
TCGA-CV-A45O	851	0	MALE	57	unknow	unknow	unknow	A	6.4024	8.635	2.58063	3.43796	3.6796	6.68384	5.60887	7.31441	3.53406	7.82045	8.45901	6.9612	4.11119	8.15771	3.1068	3.10111	2.20328	3.6107	6.07813	4.20905	2.89719	4.03923	6.06833	6.81868	3.07391	3.75357	3.31152
TCGA-CV-A45P	639	0	FEMALE	82	I-II	T1	N0	A	7.65694	9.57407	2.95571	4.15865	3.99231	8.90126	5.86368	7.99477	3.96881	7.85253	9.43816	8.25469	4.94546	8.46608	3.22299	3.04903	2.26122	4.81869	7.7166	5.21253	3.8444	4.44097	7.43892	7.93582	3.81166	4.69518	4.19354
TCGA-CV-A45Q	5152	1	FEMALE	69	unknow	unknow	unknow	A	6.40793	7.35416	2.35417	3.19941	3.55103	5.32036	3.68101	6.21622	2.3561	6.53137	9.91731	8.28572	4.08423	8.24069	3.34193	3.04903	2.17058	3.6865	6.94688	5.44568	2.26552	3.15168	6.46062	8.68353	3.10133	3.54704	2.97687
TCGA-CV-A45R	5480	0	MALE	46	III-IV	T2	N1	A	7.4095	9.20526	4.09543	4.83201	5.15588	6.38895	6.53156	8.40543	4.05849	7.58906	9.23104	8.78244	5.1333	7.74049	4.85285	3.18234	2.62094	5.49606	7.45052	6.18369	5.08648	4.57314	7.64386	7.96319	4.30334	5.24709	4.71664
TCGA-CV-A45T	4856	1	FEMALE	64	unknow	T1	N0	B	6.97805	8.29948	5.54627	4.5782	6.20636	7.53152	6.29992	7.49561	3.33388	7.31774	9.96157	8.31717	5.24724	8.44893	4.96436	3.04903	2.91836	5.14397	7.29372	5.46813	6.22041	3.86951	7.37024	8.61407	3.899	5.08703	3.6744
TCGA-CV-A45U	1079	1	MALE	59	III-IV	T4	N2	A	8.24114	6.58803	3.30332	5.84219	5.10774	9.96711	7.17617	7.75894	4.29062	6.21711	9.89983	8.50746	6.08732	8.99986	4.03713	3.21798	2.5103	5.89448	8.60553	6.62485	4.87756	4.70325	7.73841	8.83882	4.98934	5.68871	4.45427
TCGA-CV-A45V	32	1	FEMALE	87	III-IV	T4	N0	A	7.37736	9.80016	5.88986	4.52613	4.67755	9.48638	5.94187	8.38677	4.10151	7.80432	9.20909	8.27594	4.50148	8.90375	4.53487	3.04903	2.18633	4.91957	7.64267	5.77305	4.34677	4.51881	7.4848	7.89602	4.20465	4.75652	4.2616
TCGA-CV-A45W	1398	1	MALE	75	I-II	T2	N0	B	7.29031	5.78796	5.85766	4.84086	5.30846	5.05328	6.08251	7.15071	3.75966	4.83251	9.00115	7.8959	5.41787	8.6328	5.7363	4.9445	2.37687	5.1764	7.91448	5.94465	5.24833	3.4992	7.33227	8.24776	4.78612	5.4893	3.92478
TCGA-CV-A45X	198	1	MALE	47	III-IV	T2	N2	A	7.50319	9.23456	2.60299	4.29091	3.69856	8.4812	6.46464	7.55599	4.74187	5.62556	9.44935	8.05302	4.84401	7.69477	3.40382	3.04903	2.29825	4.84639	7.67898	5.30602	3.14677	4.05135	7.07238	7.58179	3.78557	4.8414	4.65502
TCGA-CV-A45Y	2703	1	MALE	61	III-IV	T4	N0	B	7.76952	7.81093	4.47479	4.98168	6.13583	5.5551	5.98004	7.57061	3.70992	7.07016	9.66538	8.08585	5.14364	7.72662	6.26198	3.25995	2.91765	5.20082	6.98905	6.47654	5.10905	4.94646	7.41717	8.63164	4.2292	5.24274	4.03554
TCGA-CV-A45Z	1466	1	MALE	75	unknow	T1	N0	A	7.96597	8.59608	5.62509	5.44271	5.74431	5.40138	6.05669	7.7431	3.87258	6.83563	10.0048	8.90915	6.0902	8.81514	5.58241	3.20886	3.27309	6.1794	9.21001	7.5931	4.43468	4.08036	8.0518	8.8941	4.72104	5.69118	4.26305
TCGA-CV-A460	1838	1	MALE	72	unknow	T1	N2	B	7.80391	8.4883	3.90745	5.15257	6.13275	6.44234	6.45353	8.14498	3.46368	5.98596	9.79107	8.50238	5.99335	8.34496	8.07242	3.27631	2.53765	5.61881	8.08936	5.24506	4.92297	3.21278	8.28302	8.94971	4.5786	5.52783	5.19164
TCGA-CV-A461	2064	1	MALE	65	unknow	unknow	unknow	B	7.32788	7.13158	4.94917	5.23918	7.5012	6.46798	6.49813	8.11731	3.97378	7.31007	10.0086	8.64992	5.55343	8.41534	6.16648	3.33882	2.70793	5.40876	7.53597	5.62371	5.64834	3.56831	8.31238	8.67538	4.30344	5.59346	4.16997
TCGA-CV-A463	23	1	FEMALE	82	III-IV	T4	N0	A	7.04961	8.2393	2.53999	4.15278	3.42667	6.26327	6.24171	8.60266	3.76291	5.75825	9.27969	8.41257	5.40581	8.3089	2.9134	3.04903	2.13073	5.51472	7.10203	5.66924	3.98506	5.21344	7.49263	8.07677	3.62295	4.81623	4.35454
TCGA-CV-A464	1722	0	MALE	48	III-IV	T3	N0	B	7.55569	5.02635	6.39699	5.0493	5.09985	8.50239	6.94729	8.0476	4.50418	7.60435	9.93117	8.78442	5.53094	7.84745	5.45875	3.12704	3.28144	5.4884	7.86948	6.44437	5.25265	4.55188	8.00212	8.62781	4.58538	5.59166	4.38511
TCGA-CV-A465	215	1	MALE	24	III-IV	T3	N0	A	7.603	8.70943	3.04295	4.55666	3.30254	7.15648	5.94837	7.93053	4.12134	7.16521	9.12544	8.62671	5.34782	8.84547	3.77475	3.04903	2.46114	5.43329	7.54575	4.53127	4.13497	3.92851	8.26327	8.38041	4.33846	5.38383	4.21584
TCGA-CV-A468	464	1	MALE	42	III-IV	T4	N2	B	7.31184	9.32851	5.72325	4.74848	6.08698	8.10998	6.06555	7.95063	3.56462	7.4878	9.77937	8.19143	5.56193	8.57456	5.96891	3.25891	3.53654	5.01857	7.33417	6.00066	6.35835	4.13684	7.47389	8.1138	4.11017	5.58036	4.14179
TCGA-CV-A6JD	182	1	FEMALE	82	unknow	unknow	unknow	A	7.982	6.4628	3.61076	4.8	6.11059	9.76701	6.84992	7.77406	3.43922	5.06438	10.4459	8.7003	5.35149	7.7286	4.77527	3.04903	2.32106	5.82866	7.82568	5.74052	4.72305	3.7017	7.84516	8.99693	3.76941	5.29184	4.21834
TCGA-CV-A6JE	1075	0	MALE	78	unknow	unknow	unknow	A	7.66588	6.19044	5.40985	4.29169	6.435	6.93728	5.85084	7.02549	2.81075	7.17319	10.3528	8.34172	4.63654	8.19753	4.67829	3.04903	2.25926	5.04702	8.0791	6.56309	3.93518	3.41235	7.74753	9.13819	3.71596	5.02695	4.03012
TCGA-CV-A6JM	194	1	MALE	85	unknow	unknow	unknow	A	7.544	6.55113	2.85115	3.95434	5.25929	6.80501	4.36185	6.6925	2.74097	7.95716	10.3778	7.96907	4.07668	8.3841	4.92785	3.11953	2.71833	4.80088	7.9659	5.79894	2.86896	3.54414	5.90422	10.151	3.26758	4.43131	3.73498
TCGA-CV-A6JN	906	0	MALE	53	unknow	unknow	unknow	A	7.36116	8.63836	2.96102	3.94713	5.32586	8.70489	5.45701	6.92541	2.96243	8.2008	10.0897	8.74502	4.41652	8.32171	3.18981	3.04903	2.28839	4.93481	7.95277	6.32724	3.33075	3.35153	7.57873	9.1588	3.31487	4.62507	3.90449
TCGA-CV-A6JO	197	1	MALE	69	III-IV	T3	N2	A	8.09077	8.50688	3.32537	4.52522	4.84117	9.07549	6.60996	7.92009	3.38735	7.68391	9.74024	8.51344	5.30023	8.20823	3.09851	3.18771	2.21742	5.22573	7.85392	6.67549	4.39649	4.54707	7.65019	8.45789	4.15914	4.88763	4.43326
TCGA-CV-A6JT	852	0	MALE	65	I-II	T2	N0	A	7.37356	7.44757	6.74208	3.8966	5.21459	7.01563	4.95937	7.3375	2.78987	8.26889	9.19696	8.46875	4.14533	8.12946	4.20928	3.1789	2.55185	4.47312	6.5365	5.55694	3.40865	3.62629	6.87237	8.6796	3.23815	4.91104	2.94025
TCGA-CV-A6JU	110	0	FEMALE	61	III-IV	T4	N0	A	7.84661	6.82171	4.73864	4.78291	7.49705	4.70327	6.06045	6.782	3.28506	8.56872	10.7254	9.07161	4.74975	8.57241	5.47701	3.63997	4.05748	5.27549	8.78445	3.9925	4.14265	3.60026	7.68366	9.54848	4.15357	5.62823	3.89185
TCGA-CV-A6JY	646	0	MALE	69	III-IV	T4	N0	A	7.14377	8.32339	3.32124	4.21686	3.93255	7.63711	6.25001	8.4083	3.93204	7.08657	9.46607	8.3398	4.67871	8.927	3.56552	3.12814	2.23022	4.80563	8.00628	4.49593	3.83719	5.00556	7.41541	7.91536	4.15761	4.91991	4.63379
TCGA-CV-A6JZ	714	0	MALE	68	I-II	T2	N0	B	7.85049	5.20856	6.03036	5.25744	6.22006	6.89864	6.66676	8.40701	3.9492	6.6651	9.81882	8.70084	5.87702	8.11319	4.93423	3.04903	2.81176	5.75229	8.03841	6.699	5.97996	4.09187	8.50751	8.54265	4.46762	5.68492	5.18219
TCGA-CV-A6K0	606	0	MALE	58	I-II	T1	N0	B	7.28336	8.43473	6.09227	5.10242	5.74174	8.63458	6.62274	9.04339	4.26202	7.73993	9.60912	8.48955	5.82251	9.04622	6.08975	3.45987	3.33642	5.47734	7.64412	5.29925	6.45967	4.47845	7.84574	8.52508	4.58761	5.52768	4.86896
TCGA-CV-A6K1	685	0	MALE	65	III-IV	T4	N0	A	8.02263	8.46186	3.18829	4.72824	5.3486	6.60016	5.34131	6.15327	3.3046	3.01434	10.4141	9.03023	5.15	8.23459	4.35559	3.04903	2.3321	5.29455	8.20797	5.63873	3.55476	3.30277	8.03735	9.32201	3.6482	5.30578	3.83083
TCGA-CV-A6K2	317	1	MALE	79	III-IV	T4	N0	A	7.67322	9.28621	4.84107	4.66328	4.55251	5.94834	5.94395	8.15686	3.95404	6.75651	9.59606	8.38143	5.74514	8.16867	4.07102	3.12946	2.25084	5.48285	7.58284	6.33914	3.87737	4.48125	7.50574	8.30245	3.96422	5.18042	4.52788
TCGA-CX-7082	11	1	MALE	82	III-IV	T2	N2	A	8.25824	6.63161	5.04397	5.51258	4.71202	9.13254	7.04981	8.45544	4.85822	8.24262	10.1701	8.85058	6.13523	8.58848	4.78999	3.11666	3.31816	6.18077	8.39595	5.82985	4.66406	4.20823	8.19749	9.11041	5.11306	6.08154	4.6407
TCGA-CX-7085	321	0	FEMALE	77	I-II	T1	N0	B	6.93152	9.77216	7.33464	4.05461	5.78699	7.8156	5.84077	8.72775	3.94963	6.71481	9.35801	7.71916	5.00579	7.59934	5.34562	3.04903	3.67311	4.68562	6.99552	5.38899	6.18221	4.82612	6.6859	7.3114	3.97268	4.76858	4.27563
TCGA-CX-7086	573	0	MALE	53	III-IV	T3	N1	A	8.50477	8.98696	3.68219	4.9194	3.96622	9.50092	6.38501	7.86662	4.58078	7.16805	9.3808	8.70807	5.72246	8.33772	3.16551	3.04903	2.43282	5.60357	8.33109	5.65461	4.22814	4.72954	7.79894	8.77062	4.91493	5.41577	5.03679
TCGA-CX-7219	1045	0	MALE	47	III-IV	T4	N2	B	8.16515	8.76467	5.60958	4.49385	5.39623	10.4202	6.49346	9.05709	4.23657	3.22277	10.0154	8.26026	5.36655	8.12849	5.62194	3.22981	2.56262	5.21427	8.16121	6.66047	5.49785	5.43213	8.3201	8.56762	4.82341	5.53476	4.82412
TCGA-CX-A4AQ	1555	0	MALE	56	III-IV	T2	N2	B	7.52237	5.1912	5.80497	5.37945	7.14977	6.12108	6.41793	6.78262	3.51856	6.30385	9.76948	8.47847	6.02927	8.68012	8.44056	3.37607	2.41038	5.76055	7.76282	6.32007	5.78897	2.93982	8.469	8.97005	4.95745	6.02929	4.30759
TCGA-D6-6515	403	1	FEMALE	82	I-II	T2	N0	B	7.52979	7.51785	5.43396	5.28145	5.98066	4.38005	6.56253	8.70787	4.29012	6.63194	9.82984	9.02668	5.98341	8.34687	5.78786	3.12285	2.30723	5.7574	7.42433	6.3556	5.92699	4.94922	7.67138	8.70054	4.25212	5.15646	5.31062
TCGA-D6-6516	773	0	MALE	69	I-II	T1	N0	A	6.7241	7.5035	3.31056	4.93276	4.67275	6.65181	5.89159	9.3106	3.64855	8.29399	9.52502	8.50856	5.19792	8.61164	3.61241	3.04903	3.15891	4.94599	8.10807	5.00062	4.63911	4.91165	7.47183	8.3915	4.19168	4.7427	4.29071
TCGA-D6-6517	292	0	MALE	59	III-IV	T3	N0	A	7.70783	7.26121	4.22878	4.52028	5.33143	3.35266	7.13869	8.81047	4.35905	3.78232	9.93047	8.72346	5.66112	8.13394	3.94235	3.04903	2.49821	5.67945	8.01119	7.11087	5.09072	5.0611	8.08924	8.58846	4.28641	4.92345	5.24259
TCGA-D6-6823	701	0	MALE	50	I-II	T2	N0	A	8.82485	8.37267	4.57507	5.47371	4.48784	5.03737	6.59662	8.78839	4.53025	4.01378	9.94844	9.48382	6.16603	8.06181	4.4898	3.10311	2.50393	6.15926	8.64862	6.45805	3.97537	4.83358	8.03064	9.35324	4.55154	5.35746	5.61542
TCGA-D6-6824	77	0	MALE	61	III-IV	T4	N0	B	7.32399	6.78572	6.84041	5.13643	5.79617	4.31864	6.61984	8.7725	4.78609	4.55755	9.88597	8.06424	5.36995	7.66572	6.17424	3.11732	3.74416	5.65957	7.75837	5.13956	6.48536	4.75592	7.52991	8.14944	4.54197	5.32363	4.82096
TCGA-D6-6825	491	0	MALE	73	I-II	T1	N0	B	7.4313	8.13213	5.66843	4.76198	6.07217	6.73253	6.68611	9.52306	4.47337	8.16997	9.60071	8.7683	5.59486	8.05549	4.6459	3.192	2.88937	5.54398	7.13987	6.51672	5.93874	4.76997	7.61344	8.4317	4.46054	5.48466	5.29394
TCGA-D6-6826	348	1	FEMALE	64	III-IV	T4	N2	B	7.06536	9.0025	5.18168	5.46055	5.30629	5.11201	6.49516	10.1438	5.00446	3.57665	9.8191	9.01831	6.40486	7.47292	5.47239	3.10467	2.64949	6.09284	7.02472	5.86233	5.29596	5.40941	7.60688	8.0598	4.48397	5.25379	5.29679
TCGA-D6-6827	568	0	FEMALE	55	I-II	T1	N0	B	6.94053	8.17017	5.85747	5.8441	5.15477	4.59255	6.43993	7.82191	3.99538	6.43017	8.7534	8.6306	6.16784	8.19743	7.79215	3.11998	3.34104	5.59238	9.1825	4.99642	5.74437	5.12631	8.00681	8.79286	5.20074	6.3221	5.46344
TCGA-D6-8568	759	0	MALE	62	I-II	T2	N0	A	8.18573	7.96457	5.98841	4.87773	4.91522	11.5738	6.87627	8.42109	4.60024	5.25126	10.0324	8.73668	6.10061	7.7405	4.90742	3.38317	2.95635	5.68514	7.97744	6.35842	4.97289	4.30316	8.00595	8.56478	4.62652	5.50341	5.1702
TCGA-D6-8569	770	0	MALE	52	I-II	T2	N0	A	7.97867	9.06017	4.73105	5.15025	5.07351	6.32166	6.9068	8.82259	4.30484	7.31999	10.1729	8.87858	6.21601	8.01298	3.60222	3.28866	2.39922	5.99099	8.35399	7.4048	4.61663	4.96928	8.25897	8.4793	4.7108	5.5583	5.3834
TCGA-D6-A4Z9	539	0	MALE	59	III-IV	T2	N2	A	7.71569	8.25196	4.94136	5.01163	4.63175	5.57368	6.97269	8.44589	4.4325	5.85879	9.98045	8.24092	6.3269	8.25799	4.25425	3.13166	2.46523	5.9439	8.03628	6.44228	4.36408	4.7621	8.46567	8.67321	4.37881	5.47506	5.48511
TCGA-D6-A4ZB	376	0	MALE	61	III-IV	T3	N0	A	7.43666	8.1257	3.66247	4.89497	4.6849	7.65933	6.14506	8.04265	3.79751	5.20482	9.7604	8.20405	5.35436	8.86582	4.30018	3.8308	2.43461	5.2352	7.59242	5.9827	4.00979	3.70363	7.37725	8.36936	4.16707	5.28579	3.9821
TCGA-D6-A6EK	875	0	MALE	67	III-IV	T2	N1	A	6.25312	8.05252	2.92725	3.97653	6.27998	3.89268	4.78612	6.53502	2.68057	6.78255	9.7475	8.0801	4.17142	8.90476	3.5967	3.04903	2.24068	4.50676	7.3434	5.21117	4.3188	3.20002	6.81536	8.66547	3.15101	4.24856	3.17153
TCGA-D6-A6EM	232	0	FEMALE	65	III-IV	T2	N1	B	7.11435	6.40812	5.6964	5.04751	6.69471	5.06545	6.07796	6.56282	2.73741	6.04127	11.1641	9.13907	5.6734	8.30708	5.04728	3.04903	5.03893	6.01624	8.10515	5.17657	4.96678	3.43002	8.41319	9.72873	3.79251	5.13023	4.25801
TCGA-D6-A6EN	687	0	MALE	71	III-IV	T2	N1	A	7.72542	5.47939	3.48764	4.55762	6.65863	6.40433	5.31843	6.59327	2.95661	5.56118	10.7364	8.97069	5.15116	8.02658	3.26857	3.04903	2.21613	5.53921	8.37022	7.95481	4.27254	2.99085	8.03407	9.33365	3.53093	4.91582	4.34742
TCGA-D6-A6EO	759	0	MALE	44	III-IV	T4	N0	A	7.89571	9.01394	3.85336	5.18159	4.63301	7.36155	6.71923	7.75893	5.03683	5.92082	9.94837	9.24956	5.87861	8.33028	5.37595	3.34804	2.42763	6.01011	8.43098	7.10518	4.52238	3.98689	9.36838	8.6607	5.05266	5.28861	4.11381
TCGA-D6-A6EP	424	0	MALE	62	III-IV	T3	N0	B	6.38533	3.2031	3.82006	5.04266	4.54166	8.09169	6.09311	6.72281	2.88444	6.51614	9.82363	8.02453	5.07834	8.13962	7.28715	3.04903	2.55161	5.14569	8.31176	5.62073	4.89456	3.10774	7.84696	9.61148	4.98078	5.49889	3.64625
TCGA-D6-A6EQ	368	0	MALE	57	III-IV	T4	N1	A	7.78498	7.3403	4.35442	4.32977	5.61545	7.92451	5.06248	7.55338	3.13563	8.30569	9.54906	8.60681	4.84375	8.53607	4.22074	3.04903	2.4933	4.75091	7.37216	6.95484	4.26882	3.27506	8.23951	9.14874	3.55337	4.80158	3.74538
TCGA-D6-A6ES	389	0	MALE	50	III-IV	T4	N0	A	7.77888	7.48371	2.49572	3.47405	4.79631	6.76716	4.74187	6.37378	2.31205	7.9296	9.86779	8.08406	3.17625	8.18613	4.19106	3.04903	3.46194	4.58273	7.08885	5.63602	2.1364	3.06957	6.66882	10.0082	3.18745	4.86681	2.99556
TCGA-D6-A74Q	710	0	MALE	67	III-IV	T4	N0	B	7.51737	9.06819	3.97889	5.41387	6.21173	9.21597	5.61423	7.78494	3.82679	5.70194	9.53323	8.87696	5.97883	8.17861	5.34412	3.04903	2.53405	5.82245	8.08412	5.06934	4.60904	3.54625	8.04891	9.02014	4.46784	5.71272	4.30277
TCGA-DQ-5624	1778	0	FEMALE	43	unknow	unknow	unknow	A	8.07544	8.56119	3.762	4.8493	5.35082	9.73675	6.13734	8.56647	4.16835	6.15502	9.40817	8.25805	6.33965	7.45475	4.73411	3.04903	2.50006	5.31745	7.95057	6.33625	4.66445	4.42001	7.02582	8.61058	4.73819	5.96881	4.20976
TCGA-DQ-5625	1133	1	FEMALE	52	unknow	unknow	unknow	B	7.20624	6.06261	4.25338	4.29414	5.69876	7.69961	7.11722	8.22315	3.6545	5.10795	10.0847	8.3581	5.00315	8.32246	4.61814	3.04903	5.62388	5.22328	7.2311	5.50739	5.62084	5.02303	7.81699	8.13946	3.91218	5.25408	4.68415
TCGA-DQ-5629	941	1	MALE	64	unknow	unknow	unknow	A	8.34637	6.79722	3.94627	4.94534	4.00838	4.66831	6.56078	8.70137	4.03101	5.93948	10.3346	8.43012	6.19793	8.95016	4.02556	3.93474	2.255	5.92155	8.86166	6.54475	4.10195	4.99942	8.20919	9.02312	5.47179	5.66891	4.50871
TCGA-DQ-5630	1030	0	MALE	73	unknow	unknow	unknow	B	7.57524	8.38524	5.17546	4.83421	5.64338	7.03219	6.50886	7.17042	4.1584	7.2423	10.0349	8.82721	5.48134	8.2176	5.25766	3.04903	2.61308	5.66699	7.54574	7.88966	5.18942	4.2289	7.88266	8.49009	4.30439	5.36666	4.55695
TCGA-DQ-5631	548	1	MALE	52	unknow	unknow	unknow	A	7.7179	6.11784	4.13858	4.97902	4.35825	5.48292	8.03439	10.1724	4.70164	6.63683	10.365	8.76684	6.29797	7.76112	4.12598	3.04903	2.48239	6.02319	8.39082	5.30502	4.27671	4.61205	7.60376	8.18168	4.80319	5.47486	5.4219
TCGA-DQ-7588	427	1	MALE	66	unknow	unknow	unknow	A	7.79889	8.35298	2.66479	4.99462	2.31406	4.11775	6.31686	8.05146	4.27556	4.7211	10.3475	9.50938	6.39964	8.10994	2.26514	3.33319	2.13119	6.40888	8.58332	7.63601	2.47319	4.31226	7.70181	9.0683	4.50479	4.99617	5.59047
TCGA-DQ-7591	622	0	MALE	62	unknow	unknow	unknow	B	9.74507	6.33221	4.28717	5.57476	6.31091	6.85398	6.10345	7.57573	4.47171	7.46743	9.55452	8.68254	6.26177	8.90905	8.96769	3.53167	3.53458	5.98653	8.6288	6.66424	5.85303	4.58404	8.73483	11.5892	6.22586	7.55403	5.86161
TCGA-DQ-7592	1143	0	MALE	57	unknow	unknow	unknow	A	9.17433	6.99776	4.77706	4.81666	5.07934	7.69612	6.89684	8.89301	3.92047	6.45957	10.1824	8.66405	5.7601	8.86672	4.368	3.22348	2.48291	5.51563	7.36294	6.78155	4.36797	5.29207	7.64388	9.36069	4.70212	5.59492	5.12648
TCGA-F7-7848	1131	0	MALE	47	III-IV	T4	N1	B	8.03419	8.89795	6.13272	4.98314	5.39858	6.22601	7.02754	8.41597	4.97141	8.33734	9.45985	8.08508	5.11289	8.2638	5.10135	3.37528	2.53266	5.14861	8.15907	5.67095	5.5548	4.17716	8.14928	9.14171	5.03688	5.84805	4.96009
TCGA-F7-8298	995	0	MALE	58	I-II	T1	N0	A	7.78272	5.63558	4.84116	5.00163	4.70406	5.254	7.1093	8.73604	4.33834	5.58049	10.0345	8.86756	6.36787	7.92366	4.73999	3.04903	2.33308	6.07979	10.1042	6.34478	4.50439	4.85158	8.19042	8.61173	5.18461	6.00423	5.60429
TCGA-F7-8489	658	0	MALE	48	I-II	T2	N0	B	7.66364	8.81282	4.07949	4.50878	5.53259	11.7906	7.24512	9.31343	4.06967	7.16455	10.2631	8.52784	5.39499	7.75536	5.17667	3.25328	2.48598	5.53576	7.65587	7.01557	5.81393	4.77134	7.54333	8.27267	3.9334	5.08956	4.41
TCGA-F7-A50G	616	0	MALE	66	III-IV	T3	N1	B	6.30028	8.41552	5.01417	4.66108	4.87253	6.41008	6.18652	8.43496	3.68428	6.97717	9.39337	8.21293	5.50931	9.01318	5.00362	3.74168	2.48162	5.05904	6.64271	5.41247	5.38662	5.13921	6.92999	7.69464	3.54205	4.89352	4.61095
TCGA-F7-A50I	92	0	MALE	72	III-IV	T4	N0	A	7.85539	9.25691	3.08933	5.00576	4.67702	8.36166	6.00862	8.11514	3.45275	5.35483	9.55233	8.65808	5.40378	8.211	3.96442	3.50363	2.92196	5.46715	7.90067	6.55779	4.34673	4.13623	8.23975	8.38349	4.69599	5.37089	3.09658
TCGA-F7-A50J	947	0	FEMALE	67	III-IV	T3	N0	A	7.35327	8.91525	3.12127	4.72697	4.3912	8.24914	6.28575	8.15644	3.86621	7.18085	9.61098	8.61044	5.40267	8.90323	3.12788	3.19863	2.34584	5.23559	7.093	6.06966	4.17339	4.87939	7.62117	8.56224	3.81848	4.94358	4.12541
TCGA-F7-A61S	576	0	MALE	62	III-IV	T3	N0	A	8.04438	8.22979	3.66635	4.99765	5.50568	5.23666	6.38465	7.04588	3.60335	7.37092	10.308	9.0753	6.1379	8.33969	3.72954	3.2399	2.38526	5.73793	8.10011	6.75292	4.81056	4.39889	8.13588	9.0543	3.88912	5.04547	4.68787
TCGA-F7-A61V	759	0	MALE	54	I-II	T2	N0	B	7.38764	8.08595	3.8436	5.18051	4.15724	8.37314	6.63773	8.06682	4.00253	6.91202	9.75986	8.96325	5.53392	9.7556	4.40953	3.04903	3.07219	5.38731	8.10784	4.41415	6.84775	3.06201	7.81205	8.80709	4.32612	5.332	4.41635
TCGA-F7-A61W	14	0	MALE	51	III-IV	T2	N2	A	8.2959	6.55051	3.8624	5.21355	3.08067	7.60303	6.84627	8.29135	4.22062	7.49453	10.6074	9.64407	5.47884	8.49807	2.90133	3.22897	2.4988	6.09593	7.95886	6.75381	3.40935	3.47942	8.49991	9.39604	4.32533	4.91992	5.25713
TCGA-F7-A620	543	0	MALE	47	III-IV	T3	N1	A	7.39855	8.42337	5.07775	5.05862	5.76503	7.70067	6.74497	7.34838	3.44548	6.41996	10.1496	8.749	5.64442	8.02151	3.50147	3.04903	2.71307	5.44261	7.52856	5.94145	5.43397	3.7573	7.93364	8.97752	3.65967	4.74963	4.55954
TCGA-F7-A622	359	1	MALE	75	III-IV	T3	unknow	A	7.67581	9.02832	2.7793	4.42283	3.31997	3.959	5.71314	7.42402	3.61031	6.91402	9.64946	8.60195	5.18221	8.24791	3.15611	3.16745	2.36444	4.8156	7.67751	6.55237	2.92725	3.19717	7.74499	8.94741	3.77311	4.84865	4.28604
TCGA-F7-A623	616	0	MALE	70	III-IV	T1	N2	A	6.91584	6.44066	4.68269	5.775	4.18946	7.79178	6.38757	7.63177	4.03241	8.67785	9.07938	8.35759	5.80598	8.88585	3.37104	3.24514	2.32096	5.86267	7.70363	4.60039	4.23995	5.15468	7.61076	7.82416	4.74253	5.37783	4.47823
TCGA-F7-A624	378	0	MALE	73	I-II	T2	unknow	B	7.58519	4.4142	3.93319	5.31038	6.48933	3.50287	5.58748	6.74377	3.29026	2.76782	10.7522	9.49413	6.84722	8.9544	4.18515	3.04903	2.30384	6.25814	7.96174	5.06025	6.34525	2.30195	8.37143	9.42699	3.98821	5.57092	4.90649
TCGA-H7-7774	407	0	FEMALE	75	III-IV	T4	N0	A	7.32493	9.63598	3.44794	4.19763	4.82245	6.65968	5.87146	8.8232	4.00557	7.2941	9.12225	8.36769	4.10774	9.31825	3.55132	3.52279	2.26215	4.87949	7.24642	4.19208	4.44854	4.41369	6.83455	8.2851	4.14387	4.34033	3.80767
TCGA-H7-8501	461	0	MALE	54	III-IV	T4	N1	B	8.50453	6.6623	5.03283	5.16324	6.13805	8.31661	6.54235	7.05992	4.25504	6.75924	10.7385	9.60747	6.2913	8.18642	3.93561	3.04903	2.19926	6.37736	9.1787	6.35664	6.45767	5.12811	8.56903	9.20996	4.38878	5.1955	5.36434
TCGA-H7-8502	458	0	MALE	50	III-IV	T4	N2	A	8.15995	6.94553	5.27825	4.80311	4.03993	5.97157	7.21589	9.59681	4.52208	5.95468	10.2556	9.11319	6.15908	8.0788	4.07855	3.04903	2.29514	6.17754	8.2745	7.00783	4.82265	4.91859	8.46731	8.48648	4.64657	5.35516	5.41512
TCGA-H7-A6C4	414	0	FEMALE	35	III-IV	T2	N2	A	7.57226	8.97525	3.40112	4.02571	4.59297	8.50086	6.49602	7.77844	3.45826	7.1422	9.90931	8.33748	5.30369	8.26002	4.06947	3.10423	4.0601	4.90001	7.33766	5.1675	4.75564	4.84219	7.13943	8.26075	3.69785	4.9576	4.2624
TCGA-H7-A76A	637	0	MALE	57	unknow	unknow	N2	B	6.91566	8.94668	6.73188	4.95226	6.80165	4.55581	6.01209	7.03953	3.65215	7.12798	9.50511	7.62796	5.46705	8.37948	6.50889	3.04903	2.43238	5.16068	6.98308	5.62473	5.39857	3.18764	6.9999	8.33496	3.65562	5.2019	4.45786
TCGA-HD-7229	1027	0	MALE	60	III-IV	T4	N0	A	8.02673	7.079	2.45675	4.58085	4.87285	6.89541	6.91873	9.94016	4.46029	7.23036	10.1449	8.5524	6.06695	7.25685	3.90815	3.04903	2.48624	5.60799	6.99427	5.46112	4.42678	4.78386	7.08927	7.97848	4.22209	5.12991	5.09759
TCGA-HD-7753	866	0	MALE	62	I-II	T1	N0	A	7.7744	8.02069	4.84962	5.22727	4.89546	6.30854	6.48183	9.38582	4.52647	8.11518	10.1454	9.25981	6.19853	7.50527	4.21513	3.04903	2.41447	5.83182	7.93488	5.81295	5.72767	4.83031	7.13793	8.90582	4.81168	5.66037	4.69323
TCGA-HD-7754	783	0	MALE	69	III-IV	T2	N2	A	8.55443	7.84629	6.4479	5.67056	4.1583	8.18008	7.23071	8.97172	4.7508	8.34017	9.77898	8.51028	6.45544	9.82249	5.83641	3.1748	2.82564	5.96784	7.88883	4.35745	4.29606	6.05431	7.80831	9.40931	5.08561	5.55985	5.43093
TCGA-HD-7831	667	0	MALE	74	III-IV	T2	N2	A	7.64345	6.67559	7.56998	5.22412	3.99031	7.11628	6.82956	8.98281	3.95657	6.08561	9.89415	8.16841	5.5058	7.62728	5.63593	3.04903	2.46896	5.40597	7.45671	5.70469	4.81615	5.04539	7.64349	8.76595	4.41051	5.37066	4.35331
TCGA-HD-7832	836	0	MALE	52	III-IV	T4	N0	A	7.62093	7.59418	3.77731	4.41373	4.80429	5.45714	6.50697	8.74965	4.32457	6.40258	10.123	9.14627	6.56937	7.72214	3.10902	3.04903	2.21269	6.08437	8.42122	7.06381	3.70428	4.94421	8.15969	8.37283	4.20802	5.13054	5.77077
TCGA-HD-8224	446	1	MALE	63	III-IV	T3	N2	B	6.91858	8.47816	6.06702	4.95257	4.26619	7.00379	7.35124	9.25555	4.50167	8.53601	9.66217	8.29808	5.83626	8.19454	5.97399	3.04903	5.05798	5.82747	7.85796	3.97841	6.10534	4.15436	7.73261	7.74692	4.83107	5.42408	5.00677
TCGA-HD-8314	670	0	MALE	58	III-IV	T1	N1	B	7.356	6.63893	6.14483	5.60679	5.51948	4.91604	6.31333	8.8772	4.71635	7.71552	9.14485	8.24406	6.43812	9.72496	7.12154	3.35143	5.63814	5.99926	8.03315	4.51485	6.23906	4.47571	7.84561	8.76272	4.41423	5.49758	4.79307
TCGA-HD-8634	385	1	FEMALE	51	I-II	T1	N0	A	7.71447	9.77543	3.47982	4.34811	3.61676	6.4462	6.16998	8.51622	4.08065	7.37435	9.77998	8.3544	5.31482	8.13776	3.45993	3.42706	2.34208	4.90492	7.84014	5.54096	4.26186	5.04543	7.34922	8.16876	4.06738	4.82778	4.37103
TCGA-HD-8635	695	0	FEMALE	61	III-IV	T1	N1	A	7.09735	7.09262	5.29814	4.90131	4.45869	7.56929	6.92726	9.61756	4.608	5.73883	10.1641	8.73819	5.42612	7.87801	4.97573	3.04903	5.39628	5.56961	7.73173	5.44106	5.09501	4.85585	7.84095	7.98877	3.89888	5.02726	4.69087
TCGA-HD-A4C1	11	0	FEMALE	41	III-IV	T4	N2	A	8.12073	8.80709	4.17047	4.80413	3.51485	9.31379	6.39674	8.62326	4.54832	6.31504	9.61304	8.85143	5.67826	8.61595	3.08097	3.04903	2.27744	5.42835	8.16023	6.25116	4.68683	5.34059	7.52061	8.29527	4.49426	5.10399	4.96429
TCGA-HD-A633	421	0	MALE	74	III-IV	T4	N0	A	8.22213	9.66761	4.05363	5.29337	3.31689	6.83834	7.00414	8.38437	4.33606	4.39749	10.5688	9.12789	6.2637	8.42996	3.96895	3.04903	2.31298	6.08678	8.40823	6.56043	3.53333	4.36661	7.38432	9.30254	4.52965	5.47597	5.1501
TCGA-HD-A634	130	1	MALE	56	III-IV	T3	N2	A	7.26637	4.26939	7.34606	6.52684	3.88088	5.69383	6.59033	3.82989	3.24431	2.87887	9.91088	9.25019	7.03752	8.57116	3.65012	3.04903	3.26354	7.04591	10.3009	5.99671	3.92184	4.6303	8.26318	9.80108	4.73367	5.83644	4.88674
TCGA-HD-A6HZ	111	0	FEMALE	79	III-IV	T2	N1	B	7.9934	8.41657	6.54311	5.28846	5.46793	6.82358	6.03845	8.51067	3.78607	7.85028	9.30481	8.3655	6.16453	9.62962	5.44083	3.69972	3.79739	5.37619	7.45971	5.5465	5.59872	4.55138	7.06685	9.5242	4.23865	5.20471	4.54172
TCGA-HD-A6I0	210	0	MALE	56	III-IV	T4	N1	A	6.51159	7.99742	4.08032	3.56711	5.58486	7.23224	4.76984	6.29624	2.66142	8.15255	10.9004	8.42926	4.69165	8.91284	3.35066	3.04903	2.30762	4.48057	7.15817	5.82598	3.47838	3.14882	7.56565	9.33189	3.18508	4.23279	3.65724
TCGA-HL-7533	1057	0	MALE	65	unknow	unknow	unknow	A	7.75716	8.4222	3.61126	5.15454	5.11852	4.67041	6.72878	8.02464	3.99454	7.41974	10.4037	9.15342	6.54135	8.59177	3.99984	3.04903	2.48205	6.08447	8.27198	5.7894	5.36647	4.83404	8.39909	8.66745	4.20607	5.71452	5.37875
TCGA-IQ-7630	485	0	MALE	49	I-II	T2	N0	A	8.08863	7.03606	4.33175	4.77859	4.6762	8.32559	6.78278	8.63706	4.17299	5.9034	10.0242	9.08654	5.95031	8.11838	3.98763	3.04903	2.30792	5.61783	7.70746	6.65193	4.26496	5.00688	7.85715	8.5185	4.08643	4.94216	5.14805
TCGA-IQ-7631	1172	0	FEMALE	60	I-II	T2	N0	B	6.71382	5.30152	5.24977	4.24817	4.14617	6.01509	5.63793	7.29302	3.26686	6.6769	8.77099	6.76403	4.16688	6.66012	4.45624	3.14854	2.5274	4.45108	7.37278	4.20304	5.06611	3.50109	7.16778	7.6435	3.64503	4.08795	3.24037
TCGA-IQ-7632	441	0	FEMALE	68	III-IV	T4	N0	A	6.92378	10.1678	3.88536	4.2876	3.44489	8.4182	5.67366	8.17151	3.83725	7.20919	9.38981	8.48602	5.09696	8.19233	3.53692	3.04903	2.25853	5.0671	7.62143	5.99938	3.79258	4.69623	7.26301	7.83421	4.18554	4.84795	4.60721
TCGA-IQ-A61E	1147	0	FEMALE	55	III-IV	T3	N0	A	7.4495	7.66683	3.07917	5.02658	5.09919	8.12059	7.05539	7.92426	4.00332	7.79043	10.6339	9.30019	6.54296	8.2381	4.09769	3.12814	2.17248	6.05406	7.78546	5.83456	4.47222	4.69038	8.31055	8.13372	4.27982	5.27119	5.44586
TCGA-IQ-A61G	360	0	MALE	57	III-IV	T4	N2	A	8.06444	6.88231	2.32847	5.3471	3.95212	10.8706	6.42912	7.61225	4.1307	4.48744	10.5182	8.86308	5.81784	9.41504	4.06416	3.04903	2.30882	5.78813	8.32155	6.32487	2.77978	4.72953	7.72095	9.51805	4.05145	5.59709	5.20868
TCGA-IQ-A61H	1138	0	MALE	76	I-II	T2	N0	A	7.65123	7.43771	6.06233	5.85392	4.02515	5.72034	6.01021	7.96857	4.06314	6.3113	9.91461	8.9941	6.18585	9.7509	5.27783	5.5032	2.54425	6.36655	8.20698	5.86786	5.06726	4.61656	8.23798	8.88419	4.953	5.69164	4.41211
TCGA-IQ-A61I	2	1	MALE	63	III-IV	T1	N2	B	6.85949	7.68108	4.20083	5.00248	6.22186	4.24266	5.73984	6.23698	3.61078	7.81934	9.25368	7.9722	6.25265	9.37076	9.33612	3.1089	2.3513	5.88028	8.46827	4.62936	4.657	2.8022	7.61948	9.40508	3.93137	5.57199	4.83764
TCGA-IQ-A61J	1021	0	MALE	54	III-IV	T2	N2	A	7.14768	8.82276	5.68282	4.93017	4.81941	7.24994	6.54558	8.46144	3.7523	7.07984	9.48076	8.30757	5.24711	8.83794	5.00515	3.04903	2.84692	5.32609	7.1368	5.84208	5.09916	4.23503	7.52582	8.31458	4.27154	5.31657	4.49232
TCGA-IQ-A61O	421	1	MALE	43	III-IV	T2	N2	B	7.10821	4.27212	7.08901	5.65447	5.06995	8.3477	6.26829	7.62825	4.22642	3.25828	10.069	8.03677	5.82855	8.34375	6.60686	3.04903	2.21924	5.40962	7.37154	5.89821	4.76991	3.75809	7.65616	8.83241	4.60604	5.45473	4.79968
TCGA-IQ-A6SG	579	0	FEMALE	61	III-IV	T3	N0	A	8.73302	9.12075	3.39812	4.85572	3.83109	7.05919	6.02261	8.50944	4.21493	7.59366	9.83355	8.5389	6.08284	8.98702	4.71716	4.04846	2.21043	5.68032	8.25294	6.66195	3.15716	4.84396	6.95003	9.23631	5.42927	5.69149	4.92136
TCGA-IQ-A6SH	471	0	MALE	55	III-IV	T2	N1	A	7.97661	7.84233	3.05784	4.28464	5.51508	4.73394	5.91064	7.42554	3.7954	7.3017	10.4758	8.53644	5.77917	8.40621	3.67232	3.12197	2.47112	5.06153	7.94581	7.00435	3.94503	3.89784	8.27104	9.48083	3.48893	5.11405	3.6221
TCGA-KU-A66S	406	1	FEMALE	69	III-IV	T1	N1	B	7.08859	6.50127	4.09998	5.63495	4.93425	8.21239	6.78672	5.91928	3.63289	6.74868	10.8312	8.97757	5.71298	8.47525	7.74913	10.2706	3.02921	5.98224	8.64889	5.24735	4.76105	4.32136	8.3604	9.05236	4.84778	5.9583	4.72823
TCGA-KU-A66T	552	0	FEMALE	53	III-IV	T4	N0	A	8.65429	7.39248	2.63639	5.00641	2.77943	7.28246	7.32586	7.81318	4.0411	6.38809	10.1419	8.60192	5.84145	8.95435	3.10453	3.24577	2.58502	5.4748	7.11791	6.40542	2.75529	5.10606	8.67626	9.77197	4.55548	5.51918	4.50779
TCGA-KU-A6H7	586	0	FEMALE	55	III-IV	T2	N2	B	6.64881	7.69902	3.43697	5.12112	6.55713	6.20319	6.37609	7.22288	3.20283	7.45275	10.6953	8.61657	5.92688	9.43492	7.83115	3.08028	2.43158	6.06536	8.45495	6.15575	4.68758	3.49537	8.41901	9.6305	3.93824	5.32712	4.91502
TCGA-KU-A6H8	327	1	MALE	41	III-IV	T2	N2	B	6.43061	8.43498	7.48874	4.85189	4.0254	10.0763	5.97139	8.42217	3.42893	6.98655	8.89705	8.1063	4.9495	9.27846	6.44829	3.04903	7.22071	5.66945	7.36238	4.89547	6.37925	4.18084	7.44416	8.42304	4.10044	5.39479	3.70424
TCGA-MT-A51W	437	0	FEMALE	52	I-II	T1	N0	A	7.34632	9.14704	3.51591	4.35485	4.15515	9.44617	6.08353	7.87904	3.81333	7.76905	9.7548	8.55765	5.49007	8.66692	3.64258	3.04903	2.25832	5.19707	7.20789	6.06665	3.9587	4.25211	7.63906	8.24204	3.86112	4.98462	4.30097
TCGA-MT-A51X	242	0	MALE	30	III-IV	T1	N2	A	7.71484	8.85927	4.14149	4.55304	4.06888	8.55215	7.02909	8.72578	4.25009	6.62458	9.9322	8.81641	4.89046	8.20663	4.16515	3.45662	2.32194	5.31954	7.54905	5.30325	4.2637	4.50401	7.80423	8.83458	3.7221	5.40977	4.44541
TCGA-MT-A67A	914	0	FEMALE	85	I-II	T1	N0	A	7.25822	7.50595	3.22456	4.90804	3.96248	5.80641	5.53506	6.80812	3.39419	6.77044	9.11193	8.24649	4.79589	8.55982	3.47229	3.42552	2.47233	4.68748	7.7923	5.03825	4.05017	3.451	7.61144	8.74187	3.75289	4.20043	3.69067
TCGA-MT-A67D	56	0	MALE	55	I-II	T2	N0	B	7.78814	8.80747	5.8473	4.88875	5.07591	9.52335	6.1694	7.7612	4.22953	6.12063	9.96489	8.85207	4.98527	8.60595	5.65337	3.10712	2.82781	5.40699	7.62113	5.26976	5.52125	3.60051	7.85358	8.82114	4.47028	5.47491	4.17115
TCGA-MT-A67F	384	0	FEMALE	60	III-IV	T4	N0	B	7.58509	9.00514	3.93768	4.69196	6.24584	7.9275	5.89187	7.27194	3.77868	6.10175	10.0634	8.41725	5.54516	8.08393	3.95773	3.04903	2.1998	5.30154	7.50121	6.95827	6.55149	4.3041	7.21732	7.75094	3.72644	4.94467	4.57663
TCGA-MT-A7BN	469	0	MALE	74	III-IV	unknow	unknow	B	7.2775	6.23794	4.13177	4.3086	6.9521	8.59596	5.61147	6.02389	3.32553	3.81588	9.86715	7.88692	5.0846	9.16854	7.19341	3.15399	2.96137	4.79262	8.36186	6.29779	4.08483	3.19379	6.91705	9.52216	3.64445	4.63569	3.75302
TCGA-MZ-A5BI	217	1	MALE	53	unknow	unknow	unknow	B	6.20913	8.60901	6.16528	4.86186	6.8796	8.65337	6.1509	6.56277	3.49007	7.03724	9.59831	8.27585	5.61471	8.83956	5.30806	3.11732	2.51614	5.26001	8.04649	6.89428	4.94781	3.62236	7.9052	8.8699	4.45193	5.49321	4.60239
TCGA-MZ-A6I9	489	1	MALE	68	unknow	unknow	unknow	A	6.82855	9.08544	4.7402	5.30535	5.01724	6.14072	6.42784	7.64307	3.4407	7.46891	10.6098	8.66667	6.23367	9.38489	5.30332	3.18621	2.72274	6.13095	8.34353	4.54959	5.14168	4.03617	8.18842	9.07207	4.17051	5.56313	4.9117
TCGA-MZ-A7D7	547	0	MALE	51	III-IV	T3	N2	A	6.43103	8.90368	4.78417	5.00176	2.86172	7.81913	5.71539	7.06059	4.09267	7.01412	10.0586	9.59095	5.16856	8.90054	3.24073	4.39845	2.31998	6.06305	9.66648	5.51508	3.18734	4.36511	8.10445	8.94508	4.0891	5.28453	4.32161
TCGA-P3-A5Q5	910	0	MALE	54	III-IV	T2	N2	B	6.91694	6.68189	4.95523	5.6345	7.08516	4.50493	6.6638	7.54421	3.75588	7.17326	9.84597	8.31092	5.64603	10.8337	8.14312	3.23381	2.74717	5.7546	7.67582	4.95416	6.55748	3.58337	7.87837	8.74544	4.01153	5.35746	4.80351
TCGA-P3-A5Q6	480	1	MALE	49	III-IV	T4	N2	A	7.73831	7.01178	5.78805	4.88434	4.49043	6.46751	6.06972	7.93234	3.23809	8.09188	10.0542	8.73078	5.90979	9.63786	4.84352	3.04903	2.48453	5.5804	8.3104	6.24259	3.27135	4.43761	8.12862	9.5166	3.71411	5.03597	4.18044
TCGA-P3-A5QA	2182	0	MALE	41	I-II	T1	unknow	A	7.80404	5.94983	6.69299	5.24276	3.41116	10.0122	6.40787	8.50769	4.29776	5.89938	10.0417	8.83646	6.16398	8.39546	4.84456	3.19585	2.613	5.8139	8.50822	6.11919	3.59848	4.29957	7.83956	8.86913	4.41033	5.30782	5.18155
TCGA-P3-A5QE	1559	0	MALE	49	III-IV	T2	N1	B	6.89077	8.64428	3.87614	6.11655	6.1823	8.48677	6.79666	8.74901	4.53224	5.83782	9.87517	8.56503	7.08618	8.76986	8.08755	3.13342	3.91954	6.10379	7.76923	5.90899	6.09518	4.53738	8.37148	8.53918	4.16731	5.73618	5.0092
TCGA-P3-A5QF	330	1	MALE	49	III-IV	T4	N2	A	7.07151	9.33594	3.66885	5.53985	5.30798	7.9129	6.29901	7.49751	4.36158	8.17517	10.1502	9.08276	6.4981	10.4313	4.77759	3.12263	2.41583	6.10967	8.01424	5.64015	4.0371	3.83466	8.58571	8.92238	3.96969	5.76737	4.98151
TCGA-P3-A6SW	1120	0	MALE	50	III-IV	T3	N3	A	6.95498	6.9849	5.49727	5.33496	5.43325	4.07692	6.90889	6.96491	3.99587	6.52102	9.81507	8.58613	6.29087	7.93517	4.98942	3.20396	2.35379	6.0287	7.59078	6.38214	4.83678	3.41824	6.98376	8.52683	3.80024	6.02063	4.99159
TCGA-P3-A6SX	1430	1	MALE	67	III-IV	T2	N1	A	8.03244	7.11674	5.10098	4.93858	3.34046	6.18213	6.60262	8.65894	3.94621	5.36419	10.2128	9.06162	5.99759	7.99083	4.83808	3.11267	2.72134	5.86614	7.4911	6.70386	3.71773	4.49989	8.05291	9.18883	3.83965	5.51054	5.74364
TCGA-P3-A6T0	578	0	FEMALE	47	III-IV	T4	N0	A	7.70393	7.01445	5.29483	4.80548	3.05508	5.69722	6.30843	9.17639	4.40254	6.3664	10.1028	9.10557	6.06287	8.15121	3.29205	4.5395	2.27998	5.59954	8.32034	5.66716	4.15904	5.09223	7.51075	8.55709	4.44107	5.3819	5.22333
TCGA-P3-A6T2	2298	0	MALE	45	III-IV	T3	N2	A	8.49001	7.91829	3.50339	4.88215	4.37795	8.04864	6.70512	8.91776	4.28162	5.15738	10.6161	9.33438	6.18245	8.59176	3.40789	3.20162	2.29935	6.18418	8.60997	7.05919	4.20687	4.82292	8.57468	9.38672	4.08119	5.3882	5.51262
TCGA-P3-A6T3	577	1	MALE	49	III-IV	T3	N2	A	7.77411	7.68701	3.12499	4.53782	3.21748	7.13599	7.0832	8.46408	3.63693	6.10998	10.5005	8.95649	5.2213	7.89613	2.79028	3.04903	2.19566	5.35203	7.70641	6.25798	2.93963	4.44679	7.49991	8.46824	4.36104	5.16184	4.7081
TCGA-P3-A6T4	62	1	MALE	54	III-IV	T4	N1	A	7.23761	7.45209	2.80337	4.84698	4.06222	8.75434	6.80796	8.38166	4.59292	8.13303	9.7871	8.84253	5.31716	9.15495	4.38453	3.34804	2.4648	5.57447	7.89083	5.61246	4.12316	4.67662	7.44591	7.86928	4.68905	5.55748	4.52883
TCGA-P3-A6T5	882	1	FEMALE	79	III-IV	T4	N0	A	6.62051	7.16153	3.89551	4.28681	4.4591	6.87084	6.52447	8.13526	3.54216	6.67581	9.98482	8.24609	5.04771	8.93533	4.89438	3.10779	2.22863	4.77423	7.56526	4.99162	3.76957	3.30539	7.74549	8.30951	4.07494	5.47259	3.78616
TCGA-P3-A6T6	395	1	MALE	53	III-IV	T4	unknow	A	7.03932	8.25615	3.6887	5.59245	4.62303	6.5341	6.3616	7.39177	4.11635	7.01393	9.57196	8.89827	6.46044	9.01658	4.75084	3.40395	2.59245	5.69918	8.3766	3.25536	3.57393	3.15342	7.5184	9.37603	4.18185	5.67441	4.9747
TCGA-P3-A6T7	487	1	MALE	55	III-IV	T3	N2	A	7.19599	7.67512	3.72806	4.42687	3.68287	8.13959	6.30351	9.19268	3.74885	5.92901	9.56556	8.69062	5.49813	8.67842	3.52527	3.22496	2.41492	5.24034	7.35521	6.6811	3.85703	4.32845	7.97263	8.53398	4.22788	5.72527	4.62176
TCGA-P3-A6T8	400	0	MALE	54	III-IV	T4	N2	A	8.13049	7.77608	5.24342	5.33603	4.94549	6.32132	5.73492	8.44696	4.25287	5.63701	9.56639	8.85446	5.77389	7.9009	5.0097	3.76062	2.52995	5.68114	8.2906	6.22803	5.46161	4.41946	7.99622	8.70285	3.86551	4.96704	4.32412
TCGA-QK-A64Z	641	1	FEMALE	79	III-IV	T4	unknow	A	8.69641	6.77825	4.67617	5.33617	3.92544	6.1765	7.08351	8.49061	4.28386	6.18536	9.80111	8.82058	5.67216	7.84096	3.65817	3.04903	2.74039	5.72654	7.64218	7.42271	3.65558	4.98615	8.27995	9.19359	4.06007	5.16781	5.00495
TCGA-QK-A652	645	0	MALE	60	III-IV	T1	N1	B	7.45235	8.61057	5.28524	4.96881	5.09748	6.83689	6.69515	8.03925	3.94904	8.04565	9.70746	8.62452	5.41639	8.68837	5.13575	3.10956	3.86569	5.16495	7.71662	5.64408	5.34405	4.0154	7.70554	8.44311	4.05621	5.52414	3.82907
TCGA-QK-A6IF	704	0	MALE	61	unknow	unknow	unknow	B	6.52482	6.71515	5.88734	6.02844	6.27024	9.37424	6.36979	7.83891	3.66332	4.85324	8.86398	8.46939	7.05689	8.19809	8.3551	3.50288	3.35129	6.04066	8.28833	5.41946	6.35732	3.9197	7.85817	8.54119	4.50126	6.08138	5.21187
TCGA-QK-A6IG	222	1	MALE	69	III-IV	T2	N1	A	8.16451	5.21237	4.47006	5.14604	5.35479	8.40291	6.56854	6.99226	3.2731	6.23817	10.4145	8.92357	6.07848	8.39361	3.91109	3.04903	2.38294	5.88195	9.20087	5.83394	4.01692	3.67157	8.50479	9.55205	4.72904	5.40768	5.02937
TCGA-QK-A6IH	653	0	FEMALE	65	III-IV	T4	N2	A	7.69949	7.23859	3.23956	4.68678	3.96886	7.75314	5.6126	7.53254	2.86971	6.43717	10.0898	9.14462	5.04852	8.17938	4.64288	3.04903	2.28799	5.44716	7.70026	6.43594	2.55588	3.63901	7.5794	9.42534	3.98259	5.67507	3.92509
TCGA-QK-A6II	284	1	MALE	52	III-IV	T4	N2	A	7.03086	8.27146	2.09331	3.77569	3.65849	6.08847	5.40311	6.7659	2.69384	5.98541	9.73529	7.84253	4.17484	7.7623	2.78001	3.04903	2.16499	4.2963	7.82525	6.08642	2.94509	3.40221	6.45058	8.28196	3.07913	4.10505	3.37215
TCGA-QK-A6IJ	387	0	MALE	71	III-IV	T2	N1	A	7.47322	8.56604	2.81991	3.88921	6.23201	5.69651	5.45629	7.13357	2.8425	8.47217	9.80344	7.80624	4.34474	9.01018	2.7976	3.04903	2.43523	4.5581	9.09815	5.87258	3.44275	2.95736	7.47059	8.96197	3.20271	4.34386	3.59557
TCGA-QK-A6V9	833	0	MALE	56	I-II	T2	unknow	B	7.07892	7.77591	3.74617	6.23925	6.37245	9.83345	6.67559	8.35476	4.829	6.55618	9.53346	8.45357	6.88007	9.18023	6.33133	3.12506	3.02209	6.03272	8.83688	6.17258	5.15261	4.51509	8.52849	8.83525	4.81734	6.19362	5.61475
TCGA-QK-A6VB	641	0	MALE	66	III-IV	T4	N0	A	7.54199	7.24336	4.65347	5.29889	3.26242	8.83181	7.06217	7.83853	4.21225	9.2476	10.261	9.38341	6.50753	9.72114	4.06329	7.22119	3.19473	6.28995	8.49018	6.27979	3.53589	4.82751	8.67284	9.19826	5.53125	6.18017	5.09035
TCGA-QK-A6VC	600	0	FEMALE	62	III-IV	T4	N1	B	7.12524	9.59016	4.297	4.98951	6.3935	7.83647	6.18644	7.89236	4.13152	5.99497	9.55702	8.17336	5.73656	8.77217	4.48017	3.12175	2.65142	5.06575	7.51801	5.68401	5.18847	3.90274	8.03791	8.15931	4.24309	4.952	3.80924
TCGA-QK-A8Z7	392	0	MALE	59	III-IV	T4	N2	A	7.78728	7.44015	4.70446	5.73863	4.17646	6.58936	6.57475	7.48382	3.3656	5.4532	10.1511	8.68549	6.64712	10.3781	5.29346	7.25336	2.67527	5.98494	8.35518	7.51452	4.78339	3.88185	8.77956	8.79186	5.41604	5.85215	5.3868
TCGA-QK-A8Z8	171	1	FEMALE	60	III-IV	T3	N1	A	7.51626	8.81895	4.11925	5.28405	5.79623	5.83764	7.01117	7.98743	4.77243	6.92346	9.83522	8.67352	5.62887	8.59211	4.37915	10.3014	3.09186	5.76478	8.33472	5.44735	4.36075	4.58712	8.36258	8.58924	5.26494	5.55475	4.32973
TCGA-QK-A8Z9	449	1	MALE	56	III-IV	T4	N2	B	7.81255	5.74801	5.43175	4.93797	4.97124	7.19886	7.28097	8.46431	4.31197	7.17105	10.0144	8.706	5.63713	8.25207	5.39966	3.23149	2.58808	5.35446	7.93636	5.77234	5.38558	3.96837	7.76864	8.65601	4.42491	5.70458	4.45172
TCGA-QK-A8ZA	371	1	MALE	60	unknow	T2	N2	A	7.32965	8.09326	4.34092	5.16408	4.59774	7.65495	7.10384	7.89587	3.73011	5.82522	10.2235	8.85705	5.75009	9.34704	4.05879	6.0603	2.85872	6.27481	8.75786	5.36512	3.27753	3.87394	7.17244	8.9428	4.21515	4.81529	5.08726
TCGA-QK-A8ZB	542	0	MALE	68	III-IV	T4	N0	B	7.43802	8.26615	3.53213	4.66824	4.51667	8.00516	6.49066	8.51176	4.29931	6.97925	9.54564	9.08728	5.48867	8.74295	4.73976	3.04903	2.55008	5.31327	7.79502	5.51776	5.82278	4.5261	7.72153	8.3771	4.30677	5.3133	3.44641
TCGA-QK-AA3J	466	0	MALE	69	I-II	T1	N0	A	7.31001	7.19191	5.72285	5.76096	6.12504	8.21145	6.97148	8.59649	4.72678	7.37135	10.3481	8.61026	6.16642	9.48431	3.83735	3.1776	3.37401	5.9706	7.95828	5.01877	5.01485	3.97876	7.96486	8.802	4.84373	6.05114	5.37825
TCGA-QK-AA3K	253	0	MALE	60	III-IV	T3	N2	B	6.82035	4.56645	5.67097	4.63515	5.64471	10.3683	6.25458	7.49576	4.10103	5.18025	9.87665	8.44224	6.09393	7.89986	6.23836	3.04903	2.5062	5.76343	7.92674	6.1304	4.95958	4.1914	7.79772	8.92932	4.48606	5.8196	4.88337
TCGA-RS-A6TO	387	1	FEMALE	82	III-IV	T4	N2	A	8.13402	5.91427	3.88445	5.11496	5.41611	7.15659	6.64766	7.77016	3.69204	6.2359	10.4086	8.77231	6.02777	8.00768	5.15036	3.04903	2.81492	5.94173	7.46597	6.12978	4.13957	4.97478	8.25187	8.80095	5.08194	5.77447	4.74877
TCGA-RS-A6TP	516	0	MALE	58	I-II	T2	N0	A	7.39371	8.48339	3.4279	5.96199	5.18531	7.01156	7.01126	8.7576	4.61886	5.47045	10.2012	8.85267	7.00228	8.52504	3.49632	3.04903	2.682	6.224	10.1694	4.85694	3.50917	4.7518	7.23929	8.33656	4.14283	5.93209	6.21417
TCGA-T2-A6WX	209	1	FEMALE	73	unknow	unknow	unknow	A	7.66215	7.14891	3.66345	4.82758	6.26103	5.57387	6.41601	7.62607	3.45331	7.74971	10.4421	8.93676	5.8457	8.36821	3.39825	3.04903	2.76129	5.87021	8.26992	7.65658	6.06839	4.08365	8.12879	8.91524	3.98642	5.245	4.70566
TCGA-T2-A6WZ	484	1	MALE	53	unknow	T3	N2	A	6.23558	7.46469	3.8185	4.3593	5.0972	8.77666	5.23412	6.38201	2.95909	7.58561	10.1257	8.35592	5.15878	9.40646	4.05443	3.1642	2.51905	4.83619	7.99352	5.70857	4.02899	3.61869	7.36709	9.08875	3.4254	4.39534	3.31839
TCGA-T2-A6X0	216	0	MALE	49	unknow	unknow	unknow	B	6.87085	5.75476	5.51712	5.61577	5.31984	6.57498	6.80385	8.22526	4.70228	7.1955	9.7603	8.95132	7.05744	9.40927	5.07649	3.23023	2.38508	6.55873	8.08427	7.48017	5.48468	4.61925	8.16503	7.90349	4.65764	5.85683	5.47517
TCGA-T2-A6X2	987	0	MALE	82	III-IV	T3	N0	A	7.95004	6.10776	3.60617	4.81264	4.97087	5.48138	6.76262	8.77442	3.9169	7.35039	9.7062	8.65737	5.46473	7.89035	3.87792	3.17264	2.26514	5.06534	7.6216	6.1943	3.87725	5.41295	7.48426	8.36012	4.29717	5.17136	4.87084
TCGA-T3-A92M	417	0	MALE	52	III-IV	T4	N2	B	7.54913	6.0163	5.17228	5.60413	5.57222	6.63262	7.09777	7.3232	3.94203	6.80944	10.3636	8.57073	5.99695	8.70208	5.25184	3.04903	2.50603	6.32915	8.06264	6.40164	6.32667	5.19632	8.15102	8.9308	4.78514	5.62088	5.11709
TCGA-T3-A92N	95	1	MALE	79	III-IV	T2	N2	A	8.34611	7.4704	3.89186	5.49275	4.91957	6.85294	6.17698	8.28593	3.59039	5.99666	9.67706	9.41634	6.6023	8.73014	3.39936	3.68147	2.458	6.29181	8.39962	8.44815	4.39681	4.99484	7.66191	9.47014	4.92169	5.89659	4.66598
TCGA-TN-A7HI	412	0	MALE	56	III-IV	T2	N2	B	6.33388	4.80011	4.15792	5.04271	6.36106	6.75238	5.49603	5.04196	3.1139	3.27004	9.58323	8.23313	6.16912	9.87927	5.38277	3.60414	2.64264	5.66179	8.65728	6.01733	4.30251	2.92488	7.51386	9.72579	3.58481	4.90658	3.78855
TCGA-TN-A7HJ	403	0	MALE	51	III-IV	T4	N2	A	7.40933	8.94435	3.72533	4.71324	4.19581	5.41738	6.49668	8.85929	3.9421	7.22623	10.0049	8.47663	4.89312	8.97383	3.96247	3.12439	2.61797	5.1788	7.95747	5.94904	4.5003	4.15397	7.47677	8.78741	3.94408	5.12802	4.21251
TCGA-TN-A7HL	619	0	MALE	59	III-IV	T3	N2	B	7.6114	7.54008	3.93192	5.11282	7.17602	5.9816	5.53887	6.68575	3.34778	6.44159	10.4714	8.52505	6.03091	9.16366	5.69963	3.16918	2.47767	5.47763	8.01063	6.39187	5.41623	3.27399	7.85145	8.8532	3.89221	5.66845	4.53733
TCGA-UF-A718	1971	0	MALE	62	III-IV	T4	N0	B	7.77502	6.76622	4.33727	4.66586	5.29231	5.7961	6.85708	8.27057	4.56463	5.94237	9.40675	8.41772	5.08401	8.41057	4.76728	3.11223	2.67737	5.57393	7.53774	5.46342	5.95717	4.3015	7.79845	8.65386	4.67842	5.26912	3.87398
TCGA-UF-A719	1663	0	MALE	54	I-II	T2	N0	A	7.64312	9.59039	3.5866	4.73173	6.66984	7.05753	6.72203	7.40597	4.0274	5.50112	10.541	8.09178	5.93232	9.20447	3.52936	3.32633	2.78653	5.72521	7.55087	6.60416	3.97885	3.24266	8.1206	8.66122	4.41539	5.31862	5.03041
TCGA-UF-A71A	86	1	MALE	67	III-IV	T4	N2	A	8.15725	7.94925	4.89161	5.98006	3.22559	7.02116	6.74277	7.87699	4.42038	7.48645	9.78943	8.94415	6.48912	10.1478	4.77727	4.62718	3.40714	6.56593	9.37754	5.7671	3.91538	4.48255	7.63248	9.57743	5.59079	6.13523	4.25337
TCGA-UF-A71B	1506	0	MALE	50	III-IV	T4	N0	A	8.51103	7.51552	4.83614	5.10033	5.06095	6.80946	6.44789	7.2999	4.32252	6.27009	9.90894	8.96392	5.34407	8.8142	5.27512	4.63214	2.13718	5.91432	8.23898	6.13647	4.30545	3.99459	8.46966	9.56118	4.72318	5.61283	4.92309
TCGA-UF-A71D	1461	0	FEMALE	54	III-IV	T4	N0	A	7.60438	9.26016	3.35063	5.43187	4.45587	5.21137	6.10084	8.58738	4.61075	6.40602	9.34297	8.62814	5.55232	8.84935	3.40263	3.04903	2.35226	5.45057	8.22019	4.45642	4.28355	3.61918	8.32265	8.91192	4.72798	5.88998	4.23746
TCGA-UF-A71E	1504	1	MALE	63	III-IV	T4	N0	A	7.51413	7.0128	4.50321	5.59326	3.62025	8.08611	5.97788	7.74396	3.8935	8.25607	9.63687	8.63219	5.88595	9.38327	4.06198	5.17868	2.34622	5.72748	8.49938	5.57302	3.23316	3.95363	7.7891	8.93022	4.89215	5.98996	4.2444
TCGA-UF-A7J9	1358	0	MALE	75	III-IV	T4	N0	A	6.96382	7.12297	6.33277	5.8329	5.12167	6.28107	6.27883	8.86396	4.53252	7.94629	9.94383	8.46125	6.53545	9.45365	5.50933	3.5473	2.63312	6.23028	7.96102	5.11083	3.90804	4.38953	7.8371	8.18268	5.14445	5.7999	4.59487
TCGA-UF-A7JA	2265	0	FEMALE	66	III-IV	T4	N1	A	7.6577	7.18359	3.85009	5.42977	3.67151	7.20116	6.23412	7.87881	3.97355	5.18702	9.59429	8.76296	5.90854	8.73303	4.38386	3.04903	2.62223	5.52147	8.38581	6.51349	4.76063	4.89224	8.36632	8.65264	4.64646	5.77308	4.92284
TCGA-UF-A7JC	546	1	MALE	42	III-IV	T3	N2	A	8.10251	8.67151	3.01432	4.53111	2.56558	8.40199	6.09214	8.99992	4.10173	7.06707	9.64548	8.91588	5.48972	9.26062	3.01795	3.04903	2.24394	5.01971	7.74594	5.74675	3.53702	4.38127	7.89133	8.61364	4.76324	5.44222	4.51871
TCGA-UF-A7JD	739	1	MALE	71	III-IV	T4	N2	B	7.65936	6.1801	6.95673	5.44945	5.99962	9.69118	6.6218	7.71626	4.02174	3.5434	10.343	8.78852	6.41187	8.18296	5.66665	4.85414	3.04192	5.90994	8.08914	5.19894	5.55522	4.1075	7.82182	9.26611	5.04385	5.88573	5.025
TCGA-UF-A7JF	1686	0	MALE	80	III-IV	T4	N2	A	7.44025	8.80021	4.12518	4.9038	5.60665	9.88802	6.35825	7.31921	3.14439	7.42655	10.1981	7.73252	4.82279	9.03186	5.34502	3.55279	2.61132	5.04634	8.164	6.93948	3.65326	3.51267	7.48672	9.51276	4.07239	4.9759	3.48752
TCGA-UF-A7JH	896	0	MALE	59	III-IV	T4	N0	A	8.00878	7.53838	5.64101	5.0405	5.11913	8.07317	6.42282	7.18341	3.53642	7.38245	9.75574	8.95556	5.31644	8.71126	5.1932	3.11776	2.66161	4.94697	7.40535	5.39196	5.22296	4.52384	7.58517	8.80072	4.16267	5.70679	4.73489
TCGA-UF-A7JJ	549	0	MALE	68	III-IV	T4	N0	B	6.95366	7.38592	6.06889	4.7384	5.85877	5.38143	6.3452	7.83162	4.05477	5.11302	9.5547	7.96088	5.24868	8.04455	6.07173	3.14066	2.80241	5.0209	7.28751	6.03731	5.71577	3.89235	7.30774	7.85837	3.9045	5.19745	4.11662
TCGA-UF-A7JK	424	1	MALE	59	III-IV	T4	N2	A	8.35422	7.04859	4.2688	5.12122	2.81569	4.7329	7.2568	8.58207	3.76909	7.26348	10.0537	8.97661	5.58775	8.83984	3.78009	3.04903	2.37668	5.44825	8.22374	6.29362	2.92764	4.43056	7.59372	9.31441	4.37643	5.18502	4.21025
TCGA-UF-A7JO	631	1	FEMALE	79	III-IV	T4	N0	B	7.60136	7.17576	4.61567	4.75394	6.35695	7.53974	6.47841	7.81946	3.69513	7.27414	10.1175	8.83872	5.71884	9.39875	5.99572	5.69523	2.68012	5.44319	8.58428	6.50947	5.11331	4.55358	8.1087	9.02932	4.93403	5.80345	4.64526
TCGA-UF-A7JS	680	1	MALE	59	III-IV	T4	N2	A	6.87704	5.92916	2.62513	3.39872	6.30629	7.02553	4.45294	5.96851	2.73981	5.37527	10.2318	7.59301	4.03547	7.53315	4.23609	3.1566	2.87702	4.94194	7.23415	7.16592	2.85037	2.64514	7.38101	9.44313	3.13529	3.94361	3.70226
TCGA-UF-A7JT	993	1	FEMALE	72	III-IV	T4	N0	A	7.7985	6.84927	5.46903	4.85553	6.09917	5.68485	6.36069	7.61289	3.79167	7.03301	10.2673	8.98116	5.85837	8.74286	4.1809	3.04903	2.26493	5.60831	7.69757	6.19832	5.00001	3.62505	8.11903	8.95638	4.14815	5.35037	4.66074
TCGA-UF-A7JV	90	1	FEMALE	62	III-IV	T4	N2	A	8.39899	7.92991	3.48148	5.03884	5.35534	7.0007	6.67792	8.32662	3.9947	6.34353	10.5865	8.90147	6.25485	8.52018	5.25664	3.04903	2.35646	5.85755	8.36082	7.43692	4.07321	4.21951	8.50086	8.73991	4.49765	5.32433	5.86838
TCGA-UP-A6WW	518	0	MALE	58	unknow	unknow	unknow	B	6.81283	7.97294	3.97673	5.33211	5.87508	4.43466	5.83158	7.81705	3.64205	8.1043	9.62096	8.70706	6.44269	9.64382	8.34178	3.16225	3.21929	6.14337	8.57312	5.33286	4.6496	3.26961	7.78028	9.5672	4.31665	5.62673	4.99954
TCGA-WA-A7GZ	625	1	MALE	58	unknow	T2	N0	A	8.16086	8.02548	3.54545	5.29067	3.77352	6.11489	7.18678	8.45008	3.89744	5.8997	9.828	8.84305	5.963	8.75468	3.90638	3.04903	2.65001	5.60855	8.75509	7.21857	3.74593	4.56515	7.82641	8.72302	5.32378	5.67949	5.20569
TCGA-WA-A7H4	443	0	MALE	69	I-II	T2	N0	B	6.99606	5.46631	6.00253	5.11128	5.21475	4.13833	7.05127	8.43742	4.0838	5.70401	10.1063	8.67716	5.82853	7.95131	5.91891	3.18513	4.18163	5.5505	7.66015	5.03118	5.37296	4.70516	8.10015	8.63868	4.56492	5.59088	4.82278
