# Supplementary figures and images for: T cell proliferation-related subtypes, prognosis model and characterization of tumor microenvironment in head and neck squamous cell carcinoma
Source: Research Square preprint supplement (doi:10.21203/rs.3.rs-2684988/v1), 2023-03-17

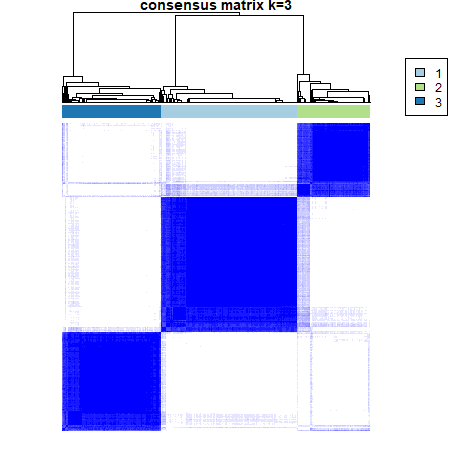

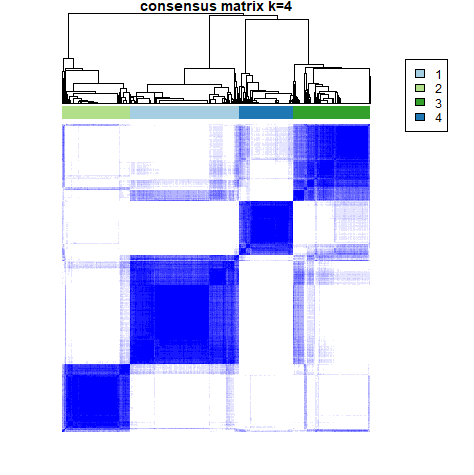

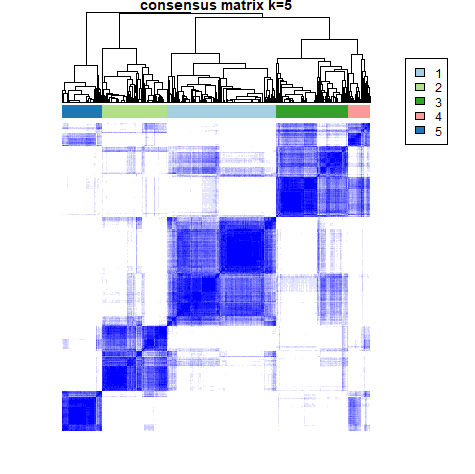

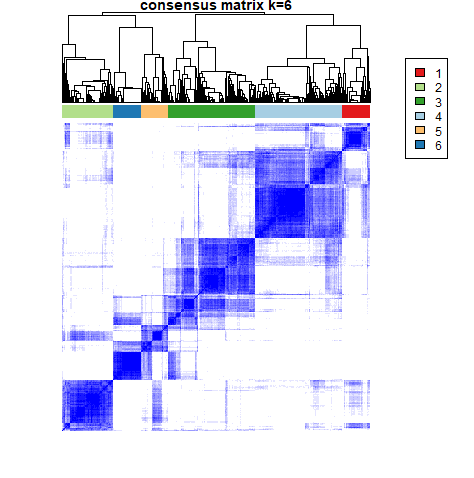

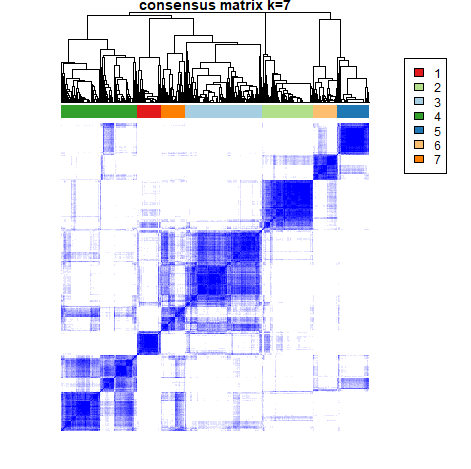

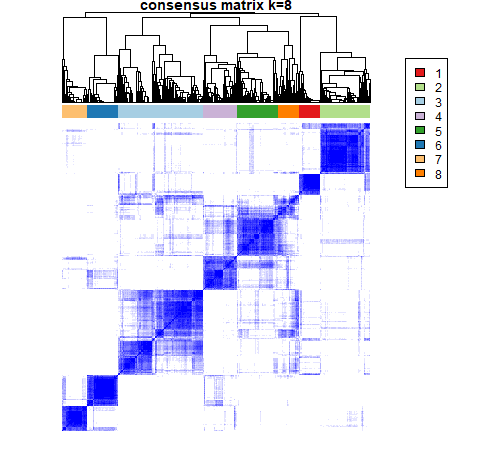

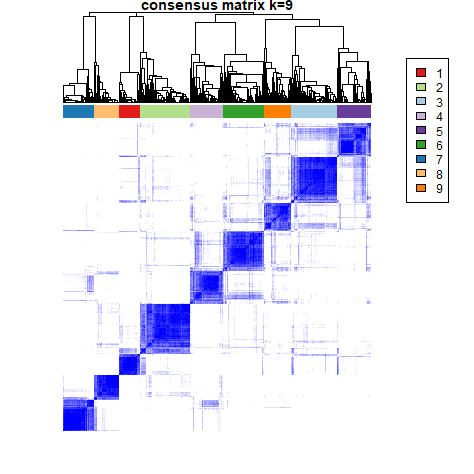


**Fig. S3** Unsupervised clustering of TRGs and Consensus matrix heatmaps for k=3-9.

Supplement: Supplementary file 2 [file 548a809ef6e7b9eee8fde358.docx]
